# Supplementary material for: Identifying Euglena Gracilis Metabolic and Transcriptomic Adaptations in Response to Mercury Stress
Source: Frontiers journal article supplement (doi:10.3389/fenvs.2022.836732), 2022-03-15
Supplement: Data_Sheet_1.xlsx [file Data_Sheet_1.xlsx]

## Sheet: Table_S1
Table S1 : Average relative abundance of metabolites observed in released exudates (left) and cellular biomolecules (right) in control and Hg treated culture of E. gracilis based on biological triplicates.
Released Exudates	Relative Abundance (%)						Cellular Biomolecules	Relative Abundance (%)
	Control (n=3)	St Dev	Hg Treated (n=3)	St Dev				Control (n=3)	St Dev	Hg Treated (n=3)	St Dev
Acetotacetate (-H2O)	1.1689	0.208	0.5034	0.1209			Acetotacetate (-H2O)	0.201843	0.20121	0.406256	0.0401947
Acetyl CoA + H2O (-CoASH)	1.5179	0.8418	0.8174	0.3087			Acetyl CoA + H2O (-CoASH)	0.875712	0.764301	3.58951	0.0622119
Acetylation (-H)	0.6192	0.1538	0.4119	0.096			Acetylation (-H)	1.9209	1.66874	2.84044	1.14827
Acetylation (-H2O), ketol group (-H2O)	2.8569	0.6857	1.2562	0.4628			Acetylation (-H2O), ketol group (-H2O)	1.52723	1.32383	1.59827	0.301062
Adenine (-H)	0.9342	0.9542	0.3669	0.1322			Adenine (-H)	0.247191	0.216988	0.244088	0.16708
Adenosine (-H2O)	0.4822	0.2608	0.2391	0.0662			Adenosine (-H2O)	0.157766	0.217773	0.406256	0.0401947
Adenosine 5'-diphosphate (-H2O)	0.2728	0.1706	0.1466	0.0474			Adenosine 5'-diphosphate (-H2O)	0.0898493	0.0778143	1.10322	0.399043
Adenosine 5'monophosphate (-H2O), adenylate (-H20)	0.36	0.2826	0.161	0.0701			Adenosine 5'monophosphate (-H2O), adenylate (-H20)	0.427314	0.407867	0.596845	0.487842
Alanine	2.622	0.4093	1.3278	0.3678			Alanine	0.5721	0.540074	0.846134	0.306052
Aminotransferase	1.545	0.3743	1.0803	0.1905			Aminotransferase	0.785863	0.687248	1.77512	0.0168177
Arg>Orn	1.2233	0.6672	0.7946	0.1145			Arg>Orn	1.1674	1.02943	1.61035	0.318138
Arginine	0.6938	0.0938	0.2894	0.0272			Arginine	0.111994	0.139514	0.181116	0.256136
Asparagine	1.1366	0.8868	0.6013	0.3654			Asparagine	0.426466	0.382127	0.749539	0.169446
Aspartic Acid	1.2189	0.3627	0.439	0.1729			Aspartic Acid	0.359609	0.319185	0.367432	0.163402
Biotinyl (-H)	0.2422	0.0748	0.2239	0.1039			Biotinyl (-H)	0.224411	0.205182	0.425204	0.423216
C2H2	3.111	0.5978	1.8493	0.1938			C2H2	2.7902	2.88142	3.60391	2.74025
C6H10O6	0.5451	0.0143	0.2681	0.0306			C6H10O6	0.202267	0.178655	0.292385	0.235383
Carbamoyl P transfer (-H2PO4)	0.2821	0.0724	0.6792	0.3746			Carbamoyl P transfer (-H2PO4)	0.830364	0.754994	0.969478	0.302374
Carboxylation	1.8886	0.1233	0.9533	0.2829			Carboxylation	1.06818	1.00588	1.28861	0.397474
CHO2	0.3151	0.104	0.5667	0.1639			CHO2	0.53846	0.50675	0.665018	0.0499154
Choline (-H2O)	0.4346	0.0998	0.2566	0.0391			Choline (-H2O)	0.325757	0.282763	0.824586	0.0974651
CO2H2	2.029	0.0673	1.0369	0.0554			CO2H2	1.44887	1.25505	1.23511	0.678041
CoASH (-glycince)	0.1604	0.0691	0.2558	0.0279			CoASH (-glycince)	0.167991	0.209271	0.301859	0.426894
CoASH (-H2CO2)	0.1129	0.1097	0.187	0.046			CoASH (-H2CO2)	0.291057	0.392736	0.403655	0.21463
CoASH (-h2o -C4H4O5)	0.3139	0.2376	0.2426	0.0362			CoASH (-h2o -C4H4O5)	0.10071	0.146101	0.592572	0.0525391
Co-enzyme A (-H)	0.2092	0.014	0.1849	0.0583			Co-enzyme A (-H)	0.134562	0.13414	0.183716	0.0817012
Condensation/dehydration	4.6049	0.9865	2.6904	0.6046			Condensation/dehydration	1.05562	0.914572	1.6423	0.171016
Cysteine	0.4513	0.2388	0.431	0.2869			Cysteine	0.751587	0.708987	1.0514	0.596339
Cytidine 5' diphosphate (-H2O)	0.3574	0.1375	0.1879	0.0377			Cytidine 5' diphosphate (-H2O)	0.313837	0.337408	0.512325	0.368311
Cytidine 5' monophsophate (-H2O)	0.3041	0.0343	0.2002	0.074			Cytidine 5' monophsophate (-H2O)	0.280408	0.269098	0.352757	0.320762
Cytosine (-H)	1.1372	0.6402	0.3816	0.2113			Cytosine (-H)	1.02219	0.887129	1.42236	0.303944
Deoxythymidine 5' diphosphate (-H2O)	0.365	0.0608	0.1932	0.0154			Deoxythymidine 5' diphosphate (-H2O)	0.179275	0.204762	0.413129	0.40614
Diphosphate	0.6121	0.3612	0.1775	0.093			Diphosphate	0.145634	0.171963	0.442479	0.0914219
Disaccharide (-H2O)	0.2433	0.1692	0.1437	0.0682			Disaccharide (-H2O)	0.35784	0.309898	1.51753	0.0194414
D-Ribose (-H2O) (ribosylation)	0.7229	0.2444	0.3995	0.1129			D-Ribose (-H2O) (ribosylation)	0.168414	0.146689	0.691768	0.0903681
Erythose (-H2O)	0.8656	0.4454	0.6259	0.1242			Erythose (-H2O)	1.19103	1.04652	1.60347	0.0478078
Ethanolamine (-H2O)	0.6239	0.2539	0.5141	0.181			Ethanolamine (-H2O)	3.01631	3.31618	3.68063	2.09741
Glucose-N-Phosphate (-H2O)	0.2368	0.1141	0.3222	0.1388			Glucose-N-Phosphate (-H2O)	1.06733	0.932813	1.07555	0.630491
Glucuronic Acid (-H2O)	0.3393	0.1854	0.2985	0.0615			Glucuronic Acid (-H2O)	0.944053	0.843824	1.95456	0.441862
Glutamic Acid	1.092	0.4413	0.4226	0.1917			Glutamic Acid	0.17991	0.170264	0.406256	0.0401947
Glutamine	1.7563	0.0912	0.3475	0.0618			Glutamine	0.134562	0.13414	0.328609	0.28661
Glutathione (-H2O)	0.4886	0.2517	0.1686	0.0995			Glutathione (-H2O)	0.269548	0.233443	0.539074	0.228028
Glycine	2.9715	0.0815	1.1801	0.5318			Glycine	0.291692	0.271325	0.665018	0.0499154
Glyoxylate (-H2O)	1.4521	0.4752	0.7542	0.239			Glyoxylate (-H2O)	0.381965	0.332788	2.77629	0.0291621
Guanine (-H)	0.8437	0.3238	0.4899	0.0979			Guanine (-H)	0.796935	0.705435	1.09022	0.473132
Guanosine (-H2O)	0.7228	0.0856	0.2779	0.0711			Guanosine (-H2O)	0.583384	0.542649	1.13165	0.175489
Guanosine 5- diphosphate (-H2O)	0.3655	0.257	0.1029	0.068			Guanosine 5- diphosphate (-H2O)	0.156706	0.215465	0.331209	0.112175
Guanosine 5- monophosphate (-H2O)	0.5151	0.2059	0.2813	0.1779			Guanosine 5- monophosphate (-H2O)	0.157342	0.140637	0.367432	0.163402
Histidine	0.9938	0.1162	0.4565	0.096			Histidine	0.258052	0.238189	0.512325	0.368311
HMG-CoA reductase	0.1146	0.0071418	0.1771	0.0424			HMG-CoA reductase	0.0896374	0.102381	0.679693	0.107444
Hydrogenation/dehydrogenation	3.9095	0.6971	2.5003	0.5519			Hydrogenation/dehydrogenation	0.314896	0.305186	0.241488	0.341515
Hydroxylation (-H)	3.7557	0.9546	3.1539	0.5453			Hydroxylation (-H)	0.190559	0.202051	0.120744	0.170757
Inorganic Phosphate	1.1812	0.4308	0.6822	0.0020434			Inorganic Phosphate	6.43699	5.60012	9.16238	5.92236
Isoleucine, Leucine	1.8904	0.3566	1.3916	0.3712			Isoleucine, Leucine	1.43886	1.31322	1.47753	0.130305
Isoprene addition (-H)	0.6975	0.7932	0.6111	0.2079			Isoprene addition (-H)	1.16698	1.06274	1.60942	1.20739
Lysine	1.7691	0.5586	0.5024	0.363			Lysine	0.549956	0.489737	0.803037	0.111121
Malonyl group (-H2O)	0.9017	0.2536	0.4849	0.0954			Malonyl group (-H2O)	0.493323	0.503298	0.533873	0.576898
Methionine	0.4424	0.1135	0.607	0.08			Methionine	0.224411	0.205182	0.476102	0.317084
Mevalonate-5-pyrophosphate decarboxylase	0.9352	0.2158	0.3008	0.0161			Mevalonate-5-pyrophosphate decarboxylase	0.583173	0.570538	0.72279	0.309729
Monosaccharide (-H2O)	0.5938	0.0451	0.4745	0.1769			Monosaccharide (-H2O)	2.8694	3.0425	2.18397	0.117423
Ornithine (-H2O)	1.0054	0.4186	0.1752	0.0196			Ornithine (-H2O)	0.224835	0.206569	0.64087	0.0157639
Palmitoylation (-H2O)	0.4158	0.0761	0.2679	0.0601			Palmitoylation (-H2O)	0.773519	0.806654	1.29809	0.588984
Phenylalanine	0.8911	0.136	0.4005	0.1538			Phenylalanine	0.358761	0.369296	0.478702	0.142649
Phosphate	0.5762	0.2738	0.8269	0.3074			Phosphate	0.696014	0.610387	0.94793	0.0937876
Polyamine Synthase	1.5534	0.3813	0.6675	0.1941			Polyamine Synthase	0.314049	0.302554	0.495977	0.189145
PolyamineReactionA	1.2736	0.3635	0.2491	0.0924			PolyamineReactionA	0.224835	0.206569	0.367432	0.163402
PolyamineReactionB	0.5494	0.112	0.2704	0.215			PolyamineReactionB	0.325968	0.295263	0.388981	0.371989
PolyamineReactionC	0.2278	0.0336	0.3647	0.0851			PolyamineReactionC	0.684094	0.671092	1.44131	0.0790775
Primary amine	0.4787	0.1043	0.7895	0.21			Primary amine	0.246768	0.235664	1.29121	0.223039
Proline	1.3667	0.8397	0.1679	0.0238			Proline	0.179275	0.204762	0.454553	0.108498
Pyridoxal phosphate (-H2O)	0.2676	0.05	0.4013	0.021			Pyridoxal phosphate (-H2O)	0.179699	0.155629	0.628795	0.00131186
Pyrophosphate	0.2215	0.0952	1.9273	0.6571			Pyrophosphate	1.09011	0.970905	1.28861	0.397474
Secondary amine	3.0952	1.0216	1.3108	0.4809			Secondary amine	1.37905	1.40937	1.6579	1.21763
Serine	2.1357	0.6524	0.1008	0.0593			Serine	0.134986	0.135412	0.256162	0.184156
Sphingosine (-H2O)	0.1649	0.1351	0.1891	0.0905			Sphingosine (-H2O)	0.786287	0.682075	1.5966	0.413754
Succinyl-CoA synthetase	0.3309	0.1207	0.2406	0.1509			Succinyl-CoA synthetase	0.751375	0.738137	0.976352	0.66832
Sulfate (-H2O)	0.6428	0.4307	0.3177	0.0813			Sulfate (-H2O)	0.471815	0.410278	0.49765	0.525671
Tertiary amine	0.6132	0.1516	0.4859	0.1251			Tertiary amine	0.246556	0.270901	0.41573	0.231705
Threonine	1.6682	0.6166	0.2416	0.0472			Threonine	0.12349	0.108131	0.229413	0.324439
Thymidine (-H2O)	0.5342	0.2024	0.1423	0.0051854			Thymidine (-H2O)	0.47245	0.473941	1.04713	0.0559586
Thymidine 5' monophosphate (-H2O)	0.4236	0.2974	0.3023	0.0405			Thymidine 5' monophosphate (-H2O)	0.965562	0.841495	1.66645	0.136864
Thymine (-H)	0.6492	0.1917	0.1588	0.0431			Thymine (-H)	1.22319	1.10414	1.23772	0.503606
Thyroxine (-H2O)	0.1128	0.0659	0.2117	0.0487			Thyroxine (-H2O)	0.258052	0.238189	0.403655	0.21463
Trisaccharide (-H2O)	0.2323	0.0417	0.2927	0.1103			Trisaccharide (-H2O)	0.314472	0.27235	0.384707	0.168392
Trypanothione (-H2O)	0.3341	0.2993	0.2473	0.1259			Trypanothione (-H2O)	0.40411	0.355868	0.64347	0.158671
Tryptophan	0.4771	0.0701	0.2644	0.0195			Tryptophan	0.0894254	0.154889	0.144893	0.204909
Tyrosine	0.3471	0.1227	0.3102	0.1357			Tyrosine	0.216453	0.187757	1.64446	0.125921
Iracil (-H)	0.2453	0.1214	0.4488	0.118			Iracil (-H)	0.0559969	0.069757	0.30446	0.252459
Urea addition (-H)	0.7559	0.0387	0.2776	0.0666			Urea addition (-H)	0.24698	0.216263	0.483903	0.206221
Uridine (-H2O)	0.6899	0.039	0.1472	0.0572			Uridine (-H2O)	0.191195	0.18639	0.292385	0.235383
Uridine 5' diphosphate (-H2O)	0.1692	0.0517	1.1178	0.4192			Uridine 5' diphosphate (-H2O)	0.966621	0.871588	1.27487	0.334418
Valine	2.4142	0.1449	0.3412	0.124			Valine	2.29052	1.99235	2.73865	0.936005
							uridine (-H2O)	0.29148	0.302341	0.437278	0.440292
							uridine 5' diphosphate (-H2O)	0.224835	0.206569	0.727991	0.0391409
							Valine	1.85213	1.63311	2.92589	1.91799

## Sheet: Table_S2
Table S1. RNA-sequencing library read/alignment summary
Library	Raw Read Pairs	Trimmed Read Pairs	Aligned Read Pairs
CT_1	23606388	22088193	17040006
CT_2	22927764	21208714	16201504
CT_4	24082744	22203813	17114555
CT_6	26742076	24639799	18969606
CT_7	25139079	23254594	17962581
CT_8	23660617	21788100	16771698
Hg_1	22281795	20505656	15825601
Hg_2	25080190		18249492
Hg_3	24516422	22953400	17808997
Hg_4	24745399	23046539	17852708
Hg_5	25090200	22935329	17726355
Hg_7	26427571	24696233	19111024

## Sheet: Table_S3
Table S3:	List of gene identifications and the statistical relationship based on expression in control and Hg treated E. gracilis cultures
Gene_id	DESeq2_norm_Ct	DESeq2_norm_Hg	DESeq2_foldchange	DESeq2_padj	edgeR_norm_Ct	edgeR_norm_Hg	edgeR_foldchange	edgeR_padj	Significant	NR_isoform_query	NR_sseqid	NR_evalue	NR_description	SWISS_isoform_query	SWISS_sseqid	SWISS_evalue	SWISS_description	Athaliana_isoform_query	Athaliana_sseqid	Athaliana_evalue	Athaliana_Description	Creinhardtii_isoform_query	Creinhardtii_sseqid	Creinhardtii_evalue	Creinhardtii_Description	Synechocutis_isoform_query	Synechocytis_sseqid	Synechocytis_evalue	Synechocytis_Description	Hsapiens_isoform_query	Hsapians_sseqid	Hsapians_evalue	Hsapians_Description	Trypanosoma_isoform_query	Trypanosoma_sseqid	Trypanosoma_evalue	Trypanosoma_Description	VM_comment
TRINITY_DN113382_c0_g1	16	133	8.346	5.69895e-43	16	134	8.268	5.84733e-43	B	TRINITY_DN113382_c0_g1_i1	KWU46501.1	6.77e-73	13 kDa ribonucleo protein-associated protein [Rhodotorula sp. JG-1b]	TRINITY_DN113382_c0_g1_i1	Q4P0K3.1	6.3e-65	RecName: Full=13 kDa ribonucleoprotein-associated protein	TRINITY_DN113382_c0_g1_i1	AT4G12600.1	5.1e-55	Ribosomal protein L7Ae/L30e/S12e/Gadd45 family protein [Source:UniProtKB/TrEMBL;Acc:F4JRD3]	TRINITY_DN113382_c0_g1_i1	EDO98882	2.18e-10	Nucleolar protein, small subunit of H/ACA snoRNPs [Source:UniProtKB/TrEMBL;Acc:A8JB67]					TRINITY_DN113382_c0_g1_i1	ENSP00000383989.1	1.19e-49	SNU13 homolog, small nuclear ribonucleoprotein (U4/U6.U5) [Source:HGNC Symbol;Acc:HGNC:7819]	TRINITY_DN113382_c0_g1_i1	EAN76582	1.35e-40	ribosomal protein S6, putative
TRINITY_DN113423_c0_g1	5	109	22.866	1.8502e-42	5	110	22.256	1.45465e-60	B	TRINITY_DN113423_c0_g1_i1	XP_016276006.1	8.31e-32	hypothetical protein RHTO_05067 [Rhodotorula toruloides NP11]
TRINITY_DN115020_c0_g1	107	765	7.122	6.24665e-86	108	772	7.089	2.10914e-137	B	TRINITY_DN115020_c0_g1_i1	KWU45966.1	1.74e-33	ribosomal protein S14 [Rhodotorula sp. JG-1b]	TRINITY_DN115020_c0_g1_i1	Q9C2P2.1	5.88e-26	RecName: Full=40S ribosomal protein S29	TRINITY_DN115020_c0_g1_i1	AT4G33865.1	1.05e-19	40S ribosomal protein S29 [Source:UniProtKB/Swiss-Prot;Acc:Q680P8]	TRINITY_DN115020_c0_g1_i1	EDO96363	3.73e-21	Ribosomal protein S29 [Source:UniProtKB/TrEMBL;Acc:A8JIE5]					TRINITY_DN115020_c0_g1_i1	ENSP00000479892.1	1e-19	ribosomal protein S29 [Source:HGNC Symbol;Acc:HGNC:10419]
TRINITY_DN127489_c0_g1	39	448	11.441	2.27252e-47	39	452	11.352	5.63536e-96	B	TRINITY_DN127489_c0_g1_i1	KWU42073.1	1.17e-24	hypothetical protein RHOSPDRAFT_36412 [Rhodotorula sp. JG-1b]	TRINITY_DN127489_c0_g1_i1	O13931.1	5.42e-10	RecName: Full=ATP synthase subunit J, mitochondrial
TRINITY_DN12926_c0_g1	24	246	9.999	5.72787e-25	25	248	9.917	7.93585e-54	B	TRINITY_DN12926_c0_g1_i1	KWU41812.1	6.67e-52	hypothetical protein RHOSPDRAFT_22291, partial [Rhodotorula sp. JG-1b]	TRINITY_DN12926_c0_g1_i1	Q06405.1	2.87e-21	RecName: Full=ATP synthase subunit f, mitochondrial; Flags: Precursor
TRINITY_DN1519_c0_g1	13	155	12.127	5.50487e-60	13	156	11.984	1.6381e-70	B	TRINITY_DN1519_c0_g1_i1	KWU42536.1	4.16e-64	cytochrome b-c1 complex subunit 8 [Rhodotorula sp. JG-1b]	TRINITY_DN1519_c0_g1_i1	P50523.1	1.31e-21	RecName: Full=Cytochrome b-c1 complex subunit 8; AltName: Full=Complex III subunit 8; AltName: Full=Ubiquinol-cytochrome c reductase complex 11 kDa protein; AltName: Full=Ubiquinol-cytochrome c reductase complex ubiquinone-binding protein QP-C
TRINITY_DN1530_c0_g1	28	265	9.483	1.26105e-39	28	268	9.399	1.98173e-87	B	TRINITY_DN1530_c0_g1_i2	KWU47037.1	1.22e-83	mitochondrial ATP synthase [Rhodotorula sp. JG-1b]	TRINITY_DN1530_c0_g1_i2	O13350.4	1.02e-37	RecName: Full=ATP synthase subunit d, mitochondrial
TRINITY_DN153056_c0_g1	16	212	13.298	1.27818e-82	16	214	13.163	1.95926e-102	B	TRINITY_DN153056_c0_g1_i1	KWU44899.1	4.09e-87	putative chloride channel protein k [Rhodotorula sp. JG-1b]																									Chloride and Zinc channels may likely shuttle HgCl2 complexes
TRINITY_DN15439_c0_g1	19	269	14.032	3.12225e-13	19	272	13.906	1.78379e-22	B	TRINITY_DN15439_c0_g1_i1	YP_008474936.1	8.06e-23	ATP synthase F0 subunit 9 (mitochondrion) [Pichia kluyveri]	TRINITY_DN15439_c0_g1_i1	P48881.1	1.59e-23	RecName: Full=ATP synthase subunit 9, mitochondrial; AltName: Full=Lipid-binding protein	TRINITY_DN15439_c0_g1_i1	AT2G07671.1	1.58e-06	ATP synthase subunit 9, mitochondrial [Source:UniProtKB/TrEMBL;Acc:Q304C3]	TRINITY_DN15439_c0_g1_i1	EDO97408	1.29e-06	F1F0 ATP synthase subunit 9, isoform A [Source:UniProtKB/TrEMBL;Acc:A8JFE2]					TRINITY_DN15439_c0_g1_i1	ENSP00000422950.1	8.97e-12	ATP synthase, H+ transporting, mitochondrial Fo complex subunit C1 (subunit 9) [Source:HGNC Symbol;Acc:HGNC:841]	TRINITY_DN15439_c0_g1_i1	EAN79491	2.37e-08	ATPase subunit 9, putative	Increased ATPase to cope with ion gradient and flux of Hg+ in the periplasm
TRINITY_DN166492_c0_g1	18	202	11.535	3.32113e-27	18	203	11.403	8.35944e-54	B	TRINITY_DN166492_c0_g1_i1	KWU41838.1	1.08e-41	hypothetical protein RHOSPDRAFT_36606 [Rhodotorula sp. JG-1b]
TRINITY_DN167310_c0_g1	7	192	27.81	3.96529e-70	7	193	27.254	2.33089e-98	B	TRINITY_DN167310_c0_g1_i1	KWU42886.1	8.04e-52	hypothetical protein RHOSPDRAFT_26704 [Rhodotorula sp. JG-1b]
TRINITY_DN17303_c0_g1	15	100	6.521	6.08344e-26	16	101	6.45	8.64749e-25	B	TRINITY_DN17303_c0_g1_i1	XP_016271770.1	2.46e-44	ubiquitin-like protein 5 [Rhodotorula toruloides NP11]	TRINITY_DN17303_c0_g1_i1	Q9FGZ9.1	4.14e-34	RecName: Full=Ubiquitin-like protein 5	TRINITY_DN17303_c0_g1_i1	AT5G42300.1	4.9e-35	Ubiquitin-like protein 5 [Source:UniProtKB/Swiss-Prot;Acc:Q9FGZ9]	TRINITY_DN17303_c0_g1_i1	EDP00494	2.1e-35	Predicted protein [Source:UniProtKB/TrEMBL;Acc:A8J6M2]					TRINITY_DN17303_c0_g1_i1	ENSP00000466910.1	1.29e-34	ubiquitin like 5 [Source:HGNC Symbol;Acc:HGNC:13736]
TRINITY_DN173084_c0_g1	38	315	8.182	4.61703e-22	39	318	8.126	9.25447e-45	B	TRINITY_DN173084_c0_g1_i1	KWU45200.1	1.2e-50	putative COX12-cytochrome-c oxidase, subunit VIB [Rhodotorula sp. JG-1b]	TRINITY_DN173084_c0_g1_i1	O94581.2	3.09e-32	RecName: Full=Cytochrome c oxidase subunit 6B; AltName: Full=Cytochrome c oxidase polypeptide VIb	TRINITY_DN173084_c0_g1_i1	AT1G22450.1	9.44e-26	COX6B [Source:UniProtKB/TrEMBL;Acc:A0A178WPQ4]	TRINITY_DN173084_c0_g1_i1	EDP05132	2.86e-21	Mitochondrial cytochrome c oxidase subunit [Source:UniProtKB/TrEMBL;Acc:A8IN92]					TRINITY_DN173084_c0_g1_i1	ENSP00000376037.2	4.72e-24	cytochrome c oxidase subunit 6B1 [Source:HGNC Symbol;Acc:HGNC:2280]					Cytochrome C upregulation largely caused by mitochriondrial oxidative stress
TRINITY_DN18689_c0_g1	19	186	9.852	3.27579e-63	19	187	9.771	2.24223e-68	B	TRINITY_DN18689_c0_g1_i1	KWU41132.1	4.25e-94	cytochrome c oxidase polypeptide IV [Rhodotorula sp. JG-1b]	TRINITY_DN18689_c0_g1_i1	P79010.1	1.97e-39	RecName: Full=Cytochrome c oxidase subunit 4, mitochondrial; AltName: Full=Cytochrome c oxidase polypeptide IV; Flags: Precursor	TRINITY_DN18689_c0_g1_i1	AT1G80230.1	2.63e-06	Cytochrome c oxidase subunit 5b-2, mitochondrial [Source:UniProtKB/Swiss-Prot;Acc:Q9SSB8]									TRINITY_DN18689_c0_g1_i1	ENSP00000258424.2	3.9e-14	cytochrome c oxidase subunit 5B [Source:HGNC Symbol;Acc:HGNC:2269]					Cytochrome C upregulation largely caused by mitochriondrial oxidative stress
TRINITY_DN20603_c0_g1	8	219	27.743	2.41118e-74	8	221	27.261	2.27396e-91	B	TRINITY_DN20603_c0_g1_i1	KWU44003.1	3.53e-27	hypothetical protein RHOSPDRAFT_34432 [Rhodotorula sp. JG-1b]
TRINITY_DN21836_c0_g1	17	196	11.452	1.75915e-78	17	198	11.34	2.7247e-101	B	TRINITY_DN21836_c0_g1_i1	XP_016271240.1	1.68e-06	mitochondrial ATPase inhibitor, IATP [Rhodotorula toruloides NP11]																									Increased ATPase to cope with ion gradient and flux of Hg+ in the periplasm
TRINITY_DN22019_c0_g1	20	114	5.736	3.79105e-29	20	114	5.685	5.79282e-28	B	TRINITY_DN22019_c0_g1_i1	KWU47498.1	1.19e-41	DUF1754-domain-containing protein [Rhodotorula sp. JG-1b]	TRINITY_DN22019_c0_g1_i1	Q92363.1	5.89e-15	RecName: Full=Uncharacterized protein C31G5.21	TRINITY_DN22019_c0_g1_i1	AT1G16810.1	5.65e-14	At1g16810/F17F16.8 [Source:UniProtKB/TrEMBL;Acc:Q9FZ43]	TRINITY_DN22019_c0_g1_i1	EDP04440	2.62e-13	Predicted protein [Source:UniProtKB/TrEMBL;Acc:A8ISD8]					TRINITY_DN22019_c0_g1_i1	ENSP00000465969.1	1.27e-10	family with sequence similarity 32 member A [Source:HGNC Symbol;Acc:HGNC:24563]
TRINITY_DN23090_c0_g1	58	364	6.31	1.04181e-99	58	367	6.28	9.40908e-105	B	TRINITY_DN23090_c0_g1_i1	KWU41536.1	1.4e-62	L30e-like protein [Rhodotorula sp. JG-1b]	TRINITY_DN23090_c0_g1_i1	P52808.2	2.19e-46	RecName: Full=60S ribosomal protein L30-1; AltName: Full=L32	TRINITY_DN23090_c0_g1_i1	AT3G18740.1	7.28e-42	60S ribosomal protein L30-3 [Source:UniProtKB/Swiss-Prot;Acc:Q9LSA3]	TRINITY_DN23090_c0_g1_i1	EDP06387	1.63e-42	Ribosomal protein L30 [Source:UniProtKB/TrEMBL;Acc:A8ICT1]					TRINITY_DN23090_c0_g1_i1	ENSP00000429483.1	8.02e-37	ribosomal protein L30 [Source:HGNC Symbol;Acc:HGNC:10333]	TRINITY_DN23090_c0_g1_i1	EAN77832	3.94e-38	60S ribosomal protein L30
TRINITY_DN2380_c0_g1	42	200	4.791	2.77833e-43	42	202	4.766	2.88213e-43	B	TRINITY_DN2380_c0_g1_i1	KWU42881.1	0	hypothetical protein RHOSPDRAFT_35610 [Rhodotorula sp. JG-1b]	TRINITY_DN2380_c0_g1_i1	Q9P784.1	9.68e-154	RecName: Full=60S ribosomal protein L4-B	TRINITY_DN2380_c0_g1_i1	AT3G09630.2	5.93e-129	60S ribosomal protein L4-1 [Source:UniProtKB/Swiss-Prot;Acc:Q9SF40]	TRINITY_DN2380_c0_g1_i1	EDP02388	6.59e-127	Ribosomal protein L4 [Source:UniProtKB/TrEMBL;Acc:A8J0I0]					TRINITY_DN2380_c0_g1_i1	ENSP00000311430.6	1.03e-134	ribosomal protein L4 [Source:HGNC Symbol;Acc:HGNC:10353]	TRINITY_DN2380_c0_g1_i1	AAZ10536	1.43e-113	60S ribosomal protein L4
TRINITY_DN24201_c0_g1	18	151	8.421	6.92944e-52	18	152	8.344	2.5775e-55	B	TRINITY_DN24201_c0_g1_i2	KWU44364.1	2.54e-66	cytochrome c oxidase, partial [Rhodotorula sp. JG-1b]	TRINITY_DN24201_c0_g1_i2	Q9UTF6.1	3.23e-41	RecName: Full=Cytochrome c oxidase subunit 6, mitochondrial; AltName: Full=Cytochrome c oxidase polypeptide VI; Flags: Precursor													TRINITY_DN24201_c0_g1_i2	ENSP00000456386.1	1.55e-21	cytochrome c oxidase subunit 5A [Source:HGNC Symbol;Acc:HGNC:2267]					Cytochrome C upregulation largely caused by mitochriondrial oxidative stress
TRINITY_DN31596_c0_g1	32	341	10.643	5.89762e-44	32	344	10.551	2.27396e-91	B	TRINITY_DN31596_c0_g1_i1	KWU42722.1	6.87e-30	hypothetical protein RHOSPDRAFT_35780 [Rhodotorula sp. JG-1b]
TRINITY_DN33219_c0_g1	15	154	10.188	1.76366e-60	15	155	10.081	5.32545e-73	B	TRINITY_DN33219_c0_g1_i1	KWU43783.1	0	glyceraldehyde-3-phosphate dehydrogenase, partial [Rhodotorula sp. JG-1b]	TRINITY_DN33219_c0_g1_i1	P09317.2	2.73e-172	RecName: Full=Glyceraldehyde-3-phosphate dehydrogenase; Short=GAPDH	TRINITY_DN33219_c0_g1_i1	AT1G79530.1	3.98e-147	Glyceraldehyde-3-phosphate dehydrogenase GAPCP1, chloroplastic [Source:UniProtKB/Swiss-Prot;Acc:Q9SAJ6]	TRINITY_DN33219_c0_g1_i1	EDO96575	7.4e-137	Glyceraldehyde-3-phosphate dehydrogenase [Source:UniProtKB/TrEMBL;Acc:A8JHR9]	TRINITY_DN33219_c0_g1_i1	BAA17609	1.36e-121	glyceraldehyde 3-phosphate dehydrogenase	TRINITY_DN33219_c0_g1_i1	ENSP00000380068.1	5.21e-151	glyceraldehyde-3-phosphate dehydrogenase [Source:HGNC Symbol;Acc:HGNC:4141]	TRINITY_DN33219_c0_g1_i1	EAN78101	6.69e-133	glyceraldehyde 3-phosphate dehydrogenase, cytosolic
TRINITY_DN33380_c0_g1	10	108	10.214	3.6909e-40	11	108	10.075	4.91975e-48	B	TRINITY_DN33380_c0_g1_i2	KWU42330.1	0	ATP synthase F1 gamma [Rhodotorula sp. JG-1b]	TRINITY_DN33380_c0_g1_i2	P49377.1	9.31e-76	RecName: Full=ATP synthase subunit gamma, mitochondrial; AltName: Full=F-ATPase gamma subunit; Flags: Precursor	TRINITY_DN33380_c0_g1_i2	AT2G33040.1	1.43e-44	ATP synthase subunit gamma, mitochondrial [Source:UniProtKB/Swiss-Prot;Acc:Q96250]	TRINITY_DN33380_c0_g1_i2	EDO97956	1.33e-42	F1F0 ATP synthase gamma subunit [Source:UniProtKB/TrEMBL;Acc:A8JDV9]	TRINITY_DN33380_c0_g1_i2	BAA16734	7.03e-31	ATP synthase g subunit	TRINITY_DN33380_c0_g1_i2	ENSP00000338568.4	2.6e-66	ATP synthase, H+ transporting, mitochondrial F1 complex, gamma polypeptide 1 [Source:HGNC Symbol;Acc:HGNC:833]					Increased ATPase to cope with ion gradient and flux of Hg+ in the periplasm
TRINITY_DN33915_c0_g1	28	103	3.721	6.94426e-22	28	104	3.697	7.0073e-24	B	TRINITY_DN33915_c0_g1_i2	KWU41262.1	3.55e-44	hypothetical protein RHOSPDRAFT_6649, partial [Rhodotorula sp. JG-1b]
TRINITY_DN34148_c0_g1	152	1118	7.37	3.97634e-49	153	1128	7.341	4.17176e-88	B	TRINITY_DN34148_c0_g1_i1	KWU47060.1	2.22e-54	ribosomal protein S21e [Rhodotorula sp. JG-1b]	TRINITY_DN34148_c0_g1_i1	Q9P844.1	1.22e-37	RecName: Full=40S ribosomal protein S21	TRINITY_DN34148_c0_g1_i1	AT5G27700.1	1.38e-28	40S ribosomal protein S21 [Source:UniProtKB/TrEMBL;Acc:A0A178UBS9]	TRINITY_DN34148_c0_g1_i1	EDP03372	1.27e-25	40S ribosomal protein S21 [Source:UniProtKB/TrEMBL;Acc:A8IXG3]					TRINITY_DN34148_c0_g1_i1	ENSP00000345957.3	2.55e-30	ribosomal protein S21 [Source:HGNC Symbol;Acc:HGNC:10409]	TRINITY_DN34148_c0_g1_i1	EAN79612	6.67e-20	40S ribosomal protein S21, putative
TRINITY_DN34654_c0_g1	95	716	7.502	5.30102e-67	96	722	7.466	1.66925e-117	B	TRINITY_DN34654_c0_g1_i1	KWU42847.1	1.05e-79	40S ribosomal protein S20 [Rhodotorula sp. JG-1b]	TRINITY_DN34654_c0_g1_i1	O74893.1	2.71e-53	RecName: Full=40S ribosomal protein S20	TRINITY_DN34654_c0_g1_i1	AT3G47370.3	1.35e-45	40S ribosomal protein S20-2 [Source:UniProtKB/Swiss-Prot;Acc:Q9STY6]	TRINITY_DN34654_c0_g1_i1	EDO99813	5.82e-47	Ribosomal protein S20 [Source:UniProtKB/TrEMBL;Acc:A8J8M9]	TRINITY_DN34654_c0_g1_i1	BAA18320	5.59e-10	30S ribosomal protein S10	TRINITY_DN34654_c0_g1_i1	ENSP00000427788.1	1.77e-50	ribosomal protein S20 [Source:HGNC Symbol;Acc:HGNC:10405]
TRINITY_DN34915_c0_g1	16	165	10.507	8.97417e-59	16	167	10.411	1.52495e-62	B	TRINITY_DN34915_c0_g1_i2	KWU46920.1	1.72e-23	hypothetical protein RHOSPDRAFT_31743 [Rhodotorula sp. JG-1b]
TRINITY_DN35324_c0_g1	21	180	8.594	1.03116e-65	21	181	8.521	7.13017e-79	B	TRINITY_DN35324_c0_g1_i1	KWU46036.1	2.51e-88	hypothetical protein RHOSPDRAFT_32516 [Rhodotorula sp. JG-1b]
TRINITY_DN36080_c0_g1	20	209	10.441	1.46792e-75	20	211	10.352	6.43554e-87	B	TRINITY_DN36080_c0_g1_i2	KWU46596.1	3.1e-22	ubiquinol-cytochrome C reductase [Rhodotorula sp. JG-1b]																									Cytochrome C upregulation largely caused by mitochriondrial oxidative stress
TRINITY_DN36194_c0_g1	69	520	7.541	3.61767e-57	70	525	7.497	2.22597e-105	B	TRINITY_DN36194_c0_g1_i1	KWU45651.1	4.37e-89	translationally controlled tumor-associated [Rhodotorula sp. JG-1b]	TRINITY_DN36194_c0_g1_i1	Q6BP09.1	9.02e-67	RecName: Full=Translationally-controlled tumor protein homolog; Short=TCTP	TRINITY_DN36194_c0_g1_i1	AT3G16640.1	3.43e-20	Translationally-controlled tumor protein 1 [Source:UniProtKB/Swiss-Prot;Acc:P31265]									TRINITY_DN36194_c0_g1_i1	ENSP00000431872.1	6.37e-36	tumor protein, translationally-controlled 1 [Source:HGNC Symbol;Acc:HGNC:12022]	TRINITY_DN36194_c0_g1_i1	AAZ13439	4.23e-17	translationally controlled tumor protein (TCTP), putative
TRINITY_DN36555_c0_g1	81	422	5.195	5.84902e-36	82	426	5.17	4.28071e-63	B	TRINITY_DN36555_c0_g1_i1	KWU43514.1	7.56e-174	L30e-like protein [Rhodotorula sp. JG-1b]	TRINITY_DN36555_c0_g1_i1	P29453.3	4.36e-101	RecName: Full=60S ribosomal protein L8-B; AltName: Full=L4; AltName: Full=L4-1; AltName: Full=Large ribosomal subunit protein eL8-B; AltName: Full=RP6; AltName: Full=YL5	TRINITY_DN36555_c0_g1_i1	AT2G47610.1	1.74e-89	60S ribosomal protein L7a-1 [Source:UniProtKB/Swiss-Prot;Acc:P49692]	TRINITY_DN36555_c0_g1_i1	EDP00656	1.57e-78	Ribosomal protein L7a [Source:UniProtKB/TrEMBL;Acc:A8J567]					TRINITY_DN36555_c0_g1_i1	ENSP00000361076.3	8.66e-99	ribosomal protein L7a [Source:HGNC Symbol;Acc:HGNC:10364]	TRINITY_DN36555_c0_g1_i1	AAZ12904	1.41e-62	60S ribosomal protein L7a, putative
TRINITY_DN36815_c0_g1	35	194	5.582	2.08542e-49	35	196	5.549	1.85922e-50	B	TRINITY_DN36815_c0_g1_i2	XP_018268353.1	2.21e-40	hypothetical protein RHOBADRAFT_66920 [Rhodotorula graminis WP1]	TRINITY_DN36815_c0_g1_i2	P0CR97.1	1.3e-30	RecName: Full=Mitochondrial import inner membrane translocase subunit TIM9	TRINITY_DN36815_c0_g1_i2	AT3G46560.1	6.45e-21	Mitochondrial import inner membrane translocase subunit TIM9 [Source:UniProtKB/Swiss-Prot;Acc:Q9XGX9]	TRINITY_DN36815_c0_g1_i2	EDP09353	9.64e-17	Mitochondrial inner membrane translocase [Source:UniProtKB/TrEMBL;Acc:A8HQS2]					TRINITY_DN36815_c0_g1_i2	ENSP00000451198.1	7.73e-15	translocase of inner mitochondrial membrane 9 [Source:HGNC Symbol;Acc:HGNC:11819]
TRINITY_DN37115_c0_g1	14	129	8.848	1.25704e-17	15	130	8.747	8.0263e-30	B	TRINITY_DN37115_c0_g1_i2	KWU47023.1	3.69e-70	NAC-domain-containing protein [Rhodotorula sp. JG-1b]	TRINITY_DN37115_c0_g1_i2	Q9M612.1	1.03e-27	RecName: Full=Nascent polypeptide-associated complex subunit alpha-like protein; Short=NAC-alpha-like protein; AltName: Full=Alpha-NAC-like protein	TRINITY_DN37115_c0_g1_i2	AT3G49470.1	3.04e-24	Nascent polypeptide-associated complex subunit alpha-like protein 2 [Source:UniProtKB/TrEMBL;Acc:A0A1I9LR04]	TRINITY_DN37115_c0_g1_i2	EDO97954	8.71e-30	Predicted protein [Source:UniProtKB/TrEMBL;Acc:A8JDV2]					TRINITY_DN37115_c0_g1_i2	ENSP00000446801.1	3.05e-27	nascent polypeptide-associated complex alpha subunit [Source:HGNC Symbol;Acc:HGNC:7629]	TRINITY_DN37115_c0_g1_i2	EAN76821	1.62e-08	nascent polypeptide associated complex subunit, putative
TRINITY_DN37549_c0_g1	72	413	5.753	5.84902e-36	73	417	5.724	1.09418e-64	B	TRINITY_DN37549_c0_g1_i2	KWU45248.1	1.25e-142	ribosomal protein S6e [Rhodotorula sp. JG-1b]	TRINITY_DN37549_c0_g1_i2	Q9C0Z7.1	2.72e-103	RecName: Full=40S ribosomal protein S6-B	TRINITY_DN37549_c0_g1_i2	AT4G31700.1	6.7e-80	40S ribosomal protein S6-1 [Source:UniProtKB/Swiss-Prot;Acc:O48549]	TRINITY_DN37549_c0_g1_i2	EDP01810	7.67e-65	40S ribosomal protein S6 [Source:UniProtKB/TrEMBL;Acc:A8J1G8]					TRINITY_DN37549_c0_g1_i2	ENSP00000369757.4	1.97e-99	ribosomal protein S6 [Source:HGNC Symbol;Acc:HGNC:10429]	TRINITY_DN37549_c0_g1_i2	EAN77451	7.1e-55	40S ribosomal protein S6, putative
TRINITY_DN37617_c0_g1	28	171	6.225	2.70134e-43	28	173	6.174	4.73741e-42	B	TRINITY_DN37617_c0_g1_i1	PAK71809.1	4.92e-16	hypothetical protein B8W95_12900, partial [Staphylococcus pasteuri]
TRINITY_DN38754_c0_g1	106	418	3.958	6.00523e-68	106	422	3.944	1.32247e-62	B	TRINITY_DN38754_c0_g1_i2	KWU45793.1	7.56e-68	hypothetical protein RHOSPDRAFT_32724 [Rhodotorula sp. JG-1b]
TRINITY_DN39610_c0_g1	1367	1600	1.169	0.00451195	1384	1614	1.165	0.0102106	B	TRINITY_DN39610_c0_g1_i2	CEF63157.1	1.75e-29	Protein transport protein Sec61 subunit gamma [Strongyloides ratti]	TRINITY_DN39610_c0_g1_i2	Q19967.1	4.35e-28	RecName: Full=Protein transport protein Sec61 subunit gamma	TRINITY_DN39610_c0_g1_i2	AT5G50460.1	5.11e-27	Protein transport protein Sec61 subunit gamma-1 [Source:UniProtKB/Swiss-Prot;Acc:P0DI74]	TRINITY_DN39610_c0_g1_i2	EDO99221	5.81e-25	Putative uncharacterized protein EZY23 [Source:UniProtKB/TrEMBL;Acc:A2PZD3]					TRINITY_DN39610_c0_g1_i2	ENSP00000341538.4	7.86e-28	Sec61 translocon gamma subunit [Source:HGNC Symbol;Acc:HGNC:18277]	TRINITY_DN39610_c0_g1_i2	AAZ10133	3.35e-24	protein transport protein Sec61 gamma subunit, putative
TRINITY_DN40051_c0_g1	107	708	6.597	1.03749e-33	108	714	6.571	6.13634e-62	B	TRINITY_DN40051_c0_g1_i2	KWU47008.1	1.55e-82	putative 60S ribosomal protein L35 [Rhodotorula sp. JG-1b]	TRINITY_DN40051_c0_g1_i2	Q8L805.1	5.09e-41	RecName: Full=60S ribosomal protein L35	TRINITY_DN40051_c0_g1_i1	AT3G55170.5	5.36e-37	60S ribosomal protein L35-3 [Source:UniProtKB/Swiss-Prot;Acc:Q9M3D2]	TRINITY_DN40051_c0_g1_i2	EDP09570	8.94e-25	Ribosomal protein L35 [Source:UniProtKB/TrEMBL;Acc:A8HNX3]					TRINITY_DN40051_c0_g1_i2	ENSP00000259469.4	2.59e-39	ribosomal protein L35 [Source:HGNC Symbol;Acc:HGNC:10344]	TRINITY_DN40051_c0_g1_i2	EAN76301	1.27e-21	60S ribosomal protein L35, putative
TRINITY_DN40268_c0_g1	151	1035	6.844	9.95618e-32	153	1044	6.819	8.53733e-57	B	TRINITY_DN40268_c0_g1_i3	KWU46813.1	2.49e-63	hypothetical protein RHOSPDRAFT_24425 [Rhodotorula sp. JG-1b]
TRINITY_DN41364_c0_g1	14	118	8.328	2.15764e-42	14	119	8.233	1.40353e-48	B	TRINITY_DN41364_c0_g1_i1	KWU42742.1	9.23e-33	hypothetical protein RHOSPDRAFT_35690 [Rhodotorula sp. JG-1b]
TRINITY_DN41778_c0_g1	140	894	6.403	2.2942e-110	141	902	6.376	5.82897e-153	B
TRINITY_DN42149_c0_g1	38	250	6.511	3.3701e-82	39	253	6.472	8.34406e-98	B	TRINITY_DN42149_c0_g1_i2	XP_016271755.1	1.8e-19	60S ribosomal protein l29 [Rhodotorula toruloides NP11]	TRINITY_DN42149_c0_g1_i2	P05747.3	6e-17	RecName: Full=60S ribosomal protein L29; AltName: Full=Large ribosomal subunit protein eL29; AltName: Full=YL43	TRINITY_DN42149_c0_g1_i2	AT3G06680.1	1.34e-17	Ribosomal L29e protein family [Source:UniProtKB/TrEMBL;Acc:F4JC32]	TRINITY_DN42149_c0_g1_i2	EDP03201	1.02e-15	60S ribosomal protein L29 [Source:UniProtKB/TrEMBL;Acc:A8IX67]					TRINITY_DN42149_c0_g1_i2	ENSP00000418346.1	2.47e-15	ribosomal protein L29 [Source:HGNC Symbol;Acc:HGNC:10331]	TRINITY_DN42149_c0_g1_i2	EAN79955	2.56e-06	60S ribosomal protein L29, putative
TRINITY_DN43042_c0_g1	89	595	6.692	1.25108e-142	90	600	6.666	1.2864e-127	B	TRINITY_DN43042_c0_g1_i1	KWU43509.1	1.39e-49	60S ribosomal protein l36 [Rhodotorula sp. JG-1b]	TRINITY_DN43042_c0_g1_i2	O94658.1	4.76e-21	RecName: Full=60S ribosomal protein L36-B	TRINITY_DN43042_c0_g1_i1	AT2G37600.1	5.19e-15	60S ribosomal protein L36-1 [Source:UniProtKB/Swiss-Prot;Acc:O80929]	TRINITY_DN43042_c0_g1_i1	EDO96564	6.98e-17	60S ribosomal protein L36 [Source:UniProtKB/TrEMBL;Acc:A8JHU2]					TRINITY_DN43042_c0_g1_i2	ENSP00000378081.2	3.8e-13	ribosomal protein L36 [Source:HGNC Symbol;Acc:HGNC:13631]	TRINITY_DN43042_c0_g1_i1	EAN77588	2.23e-10	ribosomal proteins L36, putative
TRINITY_DN43084_c0_g1	20	234	11.49	4.74793e-83	20	236	11.394	1.68718e-94	B	TRINITY_DN43084_c0_g1_i3	KWU45394.1	6.24e-75	DUF1960-domain-containing protein [Rhodotorula sp. JG-1b]	TRINITY_DN43084_c0_g1_i3	Q9P7K6.1	6.01e-11	RecName: Full=SDO1-like protein C21C3.19
TRINITY_DN43435_c0_g1	12	120	10.173	1.07007e-48	12	121	10.045	3.89462e-64	B	TRINITY_DN43435_c0_g1_i1	KWU42479.1	0	citrate synthase [Rhodotorula sp. JG-1b]	TRINITY_DN43435_c0_g1_i1	P34085.2	9.15e-176	RecName: Full=Citrate synthase, mitochondrial; Flags: Precursor	TRINITY_DN43435_c0_g1_i1	AT2G44350.3	5.9e-154	Citrate synthase 4, mitochondrial [Source:UniProtKB/Swiss-Prot;Acc:P20115]	TRINITY_DN43435_c0_g1_i1	EDO96721	2.03e-143	Citrate synthase [Source:UniProtKB/TrEMBL;Acc:A8JHC9]	TRINITY_DN43435_c0_g1_i1	BAA10262	1.62e-18	citrate synthase	TRINITY_DN43435_c0_g1_i1	ENSP00000440543.2	4.04e-164	citrate synthase [Source:HGNC Symbol;Acc:HGNC:2422]	TRINITY_DN43435_c0_g1_i1	EAN78715	8.23e-112	citrate synthase, putative	LeuA subunit of citrate synthase enzyme can bind to Zn ie Hg can also bind
TRINITY_DN43487_c0_g1	100	891	8.897	4.85333e-108	101	898	8.855	3.75753e-177	B	TRINITY_DN43487_c0_g1_i3	KWU46846.1	0	putative ADP/ATP carrier of the mitochondrial inner membrane [Rhodotorula sp. JG-1b]	TRINITY_DN43487_c0_g1_i4	P02723.1	9e-150	RecName: Full=ADP,ATP carrier protein; AltName: Full=ADP/ATP translocase; AltName: Full=Adenine nucleotide translocator; Short=ANT	TRINITY_DN43487_c0_g1_i4	AT4G28390.1	5.53e-150	ADP,ATP carrier protein 3, mitochondrial [Source:UniProtKB/Swiss-Prot;Acc:O49447]	TRINITY_DN43487_c0_g1_i4	EDP01885	1.48e-139	Adenine nucleotide translocator [Source:UniProtKB/TrEMBL;Acc:A8J1B6]					TRINITY_DN43487_c0_g1_i4	ENSP00000281154.4	3.33e-82	solute carrier family 25 member 31 [Source:HGNC Symbol;Acc:HGNC:25319]	TRINITY_DN43487_c0_g1_i4	EAN78848	2.17e-121	mitochondrial carrier protein, putative	Cytochrome C upregulation largely caused by mitochriondrial oxidative stress
TRINITY_DN43534_c0_g1	48	203	4.212	4.25807e-44	49	206	4.19	6.86231e-46	B	TRINITY_DN43534_c0_g1_i1	XP_016270477.1	1.82e-13	hypothetical protein RHTO_04550 [Rhodotorula toruloides NP11]
TRINITY_DN43818_c0_g2	61	360	5.884	1.5738e-111	62	363	5.855	6.22809e-134	B	TRINITY_DN43818_c0_g2_i1	KWU41317.1	1.18e-99	ribosomal protein S19e [Rhodotorula sp. JG-1b]	TRINITY_DN43818_c0_g2_i1	P58234.1	4.73e-67	RecName: Full=40S ribosomal protein S19-A; AltName: Full=S16-A	TRINITY_DN43818_c0_g2_i1	AT5G15520.1	2.42e-51	40S ribosomal protein S19-2 [Source:UniProtKB/Swiss-Prot;Acc:Q9LF30]	TRINITY_DN43818_c0_g2_i1	EDP07442	6.63e-43	Ribosomal protein S19 [Source:UniProtKB/TrEMBL;Acc:A8I403]					TRINITY_DN43818_c0_g2_i1	ENSP00000470004.1	3.57e-45	ribosomal protein S19 [Source:HGNC Symbol;Acc:HGNC:10402]	TRINITY_DN43818_c0_g2_i1	AAZ10777	9.07e-25	ribosomal protein S19, putative
TRINITY_DN44331_c0_g1	83	444	5.368	1.90368e-28	84	448	5.344	1.12824e-53	B	TRINITY_DN44331_c0_g1_i2	KWU44838.1	4.54e-66	ribosomal protein L35Ae, partial [Rhodotorula sp. JG-1b]	TRINITY_DN44331_c0_g1_i2	P41056.2	4.96e-43	RecName: Full=60S ribosomal protein L33-B; AltName: Full=L37; AltName: Full=Large ribosomal subunit protein eL33-B; AltName: Full=RP47; AltName: Full=YL37	TRINITY_DN44331_c0_g1_i2	AT1G74270.1	1.56e-36	60S ribosomal protein L35a-3 [Source:UniProtKB/Swiss-Prot;Acc:Q9C912]	TRINITY_DN44331_c0_g1_i2	EDP08075	9.13e-35	Ribosomal protein L35a [Source:UniProtKB/TrEMBL;Acc:A8I0Y2]					TRINITY_DN44331_c0_g1_i2	ENSP00000393393.1	3.62e-35	ribosomal protein L35a [Source:HGNC Symbol;Acc:HGNC:10345]	TRINITY_DN44331_c0_g1_i2	AAZ10809	2.67e-23	60S ribosomal protein L35A, putative
TRINITY_DN45011_c0_g1	77	522	6.814	8.57576e-58	77	526	6.779	2.22458e-104	B	TRINITY_DN45011_c0_g1_i1	KWU43404.1	9.19e-66	ribosomal protein L24, isoform CRA_c [Rhodotorula sp. JG-1b]	TRINITY_DN45011_c0_g1_i1	Q92354.1	2.43e-45	RecName: Full=60S ribosomal protein L24-A	TRINITY_DN45011_c0_g1_i1	AT3G53020.1	8.33e-25	60S ribosomal protein L24-2 [Source:UniProtKB/Swiss-Prot;Acc:P38666]	TRINITY_DN45011_c0_g1_i1	EDP02103	6.61e-24	Ribosomal protein L24 [Source:UniProtKB/TrEMBL;Acc:A8J1A3]					TRINITY_DN45011_c0_g1_i1	ENSP00000419179.1	1.83e-39	ribosomal protein L24 [Source:HGNC Symbol;Acc:HGNC:10325]	TRINITY_DN45011_c0_g1_i1	EAN79598	1.36e-15	60S ribosomal protein L24, putative
TRINITY_DN45066_c0_g1	9	109	12.529	1.89336e-44	9	110	12.33	6.41196e-59	B	TRINITY_DN45066_c0_g1_i1	KWU45215.1	0	putative MDH1-malate dehydrogenase precursor, mitochondrial [Rhodotorula sp. JG-1b]	TRINITY_DN45066_c0_g1_i3	Q9Y7R8.1	6.54e-118	RecName: Full=Malate dehydrogenase, mitochondrial; Flags: Precursor	TRINITY_DN45066_c0_g1_i3	AT1G53240.1	3.92e-94	Malate dehydrogenase 1, mitochondrial [Source:UniProtKB/Swiss-Prot;Acc:Q9ZP06]	TRINITY_DN45066_c0_g1_i3	EDP03144	3.23e-88	Malate dehydrogenase [Source:UniProtKB/TrEMBL;Acc:P93106]	TRINITY_DN45066_c0_g1_i1	BAA10470	9.81e-14	2-ketoacid dehydrogenase; malate dehydrogenase; lactate dehydrogenase	TRINITY_DN45066_c0_g1_i3	ENSP00000327070.5	2e-91	malate dehydrogenase 2 [Source:HGNC Symbol;Acc:HGNC:6971]	TRINITY_DN45066_c0_g1_i3	EAN77681	4.12e-93	mitochondrial malate dehydrogenase	Cytochrome C upregulation largely caused by mitochriondrial oxidative stress
TRINITY_DN45115_c0_g1	18	125	7.045	5.71169e-37	18	126	6.99	4.70911e-37	B	TRINITY_DN45115_c0_g1_i2	KWU43326.1	1.99e-107	hypothetical protein RHOSPDRAFT_35074 [Rhodotorula sp. JG-1b]
TRINITY_DN45193_c0_g1	340	1421	4.182	2.6015e-40	344	1434	4.168	2.29057e-72	B	TRINITY_DN45193_c0_g1_i1	KWU41773.1	4.97e-60	hypothetical protein RHOSPDRAFT_36661 [Rhodotorula sp. JG-1b]
TRINITY_DN45275_c0_g1	138	858	6.195	6.40617e-45	140	865	6.171	8.09527e-79	B	TRINITY_DN45275_c0_g1_i1	KWU41950.1	6.55e-175	40S ribosomal protein S1 [Rhodotorula sp. JG-1b]	TRINITY_DN45275_c0_g1_i1	A8NX92.1	4.56e-143	RecName: Full=40S ribosomal protein S1	TRINITY_DN45275_c0_g1_i1	AT4G34670.1	2.81e-114	40S ribosomal protein S3a [Source:UniProtKB/TrEMBL;Acc:A0A178UZT1]	TRINITY_DN45275_c0_g1_i1	EDP08964	1.25e-117	40S ribosomal protein S3a [Source:UniProtKB/Swiss-Prot;Acc:A8HS48]					TRINITY_DN45275_c0_g1_i1	ENSP00000346050.3	3.08e-107	ribosomal protein S3A [Source:HGNC Symbol;Acc:HGNC:10421]	TRINITY_DN45275_c0_g1_i1	EAN77813	3.32e-58	40S ribosomal protein S3a, putative
TRINITY_DN45277_c0_g1	61	360	5.912	1.50159e-84	61	363	5.886	3.76235e-81	B	TRINITY_DN45277_c0_g1_i2	KWU42579.1	8.97e-126	hypothetical protein RHOSPDRAFT_35838 [Rhodotorula sp. JG-1b]	TRINITY_DN45277_c0_g1_i2	O74175.1	4.38e-49	RecName: Full=60S ribosomal protein L13	TRINITY_DN45277_c0_g1_i2	AT5G23900.1	5.29e-39	60S ribosomal protein L13 [Source:UniProtKB/TrEMBL;Acc:A0A178UBD6]	TRINITY_DN45277_c0_g1_i2	EDP03689	7.97e-39	60S ribosomal protein L13 [Source:UniProtKB/TrEMBL;Acc:A8IUV7]					TRINITY_DN45277_c0_g1_i2	ENSP00000376811.3	4.36e-41	ribosomal protein L13 [Source:HGNC Symbol;Acc:HGNC:10303]	TRINITY_DN45277_c0_g1_i2	AAZ10365	1.06e-30	60S ribosomal protein L13, putative
TRINITY_DN45319_c0_g1	6436	6875	1.068	0.0130121	6515	6936	1.064	0.0489791	B
TRINITY_DN45806_c0_g1	72	463	6.432	2.75773e-52	72	467	6.398	1.05789e-93	B	TRINITY_DN45806_c0_g1_i1	KWU44549.1	3.91e-79	hypothetical protein RHOSPDRAFT_33876 [Rhodotorula sp. JG-1b]	TRINITY_DN45806_c0_g1_i1	P0CU28.1	1.33e-54	RecName: Full=40S ribosomal protein S24	TRINITY_DN45806_c0_g1_i1	AT5G28060.1	1.36e-42	40S ribosomal protein S24-2 [Source:UniProtKB/Swiss-Prot;Acc:Q8LC83]	TRINITY_DN45806_c0_g1_i1	EDP07861	2.84e-45	40S ribosomal protein S24 [Source:UniProtKB/TrEMBL;Acc:A8I0I1]					TRINITY_DN45806_c0_g1_i1	ENSP00000478869.1	8.01e-39	ribosomal protein S24 [Source:HGNC Symbol;Acc:HGNC:10411]	TRINITY_DN45806_c0_g1_i2	EAN78141	1.92e-16	40S ribosomal protein S24E, putative
TRINITY_DN45840_c0_g2	95	475	5.02	1.60685e-31	96	479	4.998	4.13523e-59	B	TRINITY_DN45840_c0_g2_i1	KWU41074.1	9.14e-123	60S ribosomal protein L20A [Rhodotorula sp. JG-1b]	TRINITY_DN45840_c0_g2_i1	P0CX23.1	1.61e-87	RecName: Full=60S ribosomal protein L20-A; AltName: Full=L18a; AltName: Full=Large ribosomal subunit protein eL20-A	TRINITY_DN45840_c0_g2_i1	AT2G34480.1	9e-60	Ribosomal protein L18ae/LX family protein [Source:TAIR;Acc:AT2G34480]	TRINITY_DN45840_c0_g2_i1	EDP09481	1.45e-56	60S ribosomal protein L18a [Source:UniProtKB/TrEMBL;Acc:A8HN50]					TRINITY_DN45840_c0_g2_i1	ENSP00000222247.4	2.93e-71	ribosomal protein L18a [Source:HGNC Symbol;Acc:HGNC:10311]	TRINITY_DN45840_c0_g2_i1	EAN77804	1.59e-39	60S ribosomal protein L18a, putative
TRINITY_DN45959_c0_g1	38	210	5.546	9.04882e-52	38	212	5.519	2.18954e-53	B	TRINITY_DN45959_c0_g1_i1	KWU42192.1	4.59e-158	hypothetical protein RHOSPDRAFT_9410, partial [Rhodotorula sp. JG-1b]	TRINITY_DN45959_c0_g1_i1	Q9C3Z6.1	4.05e-117	RecName: Full=60S acidic ribosomal protein P0	TRINITY_DN45959_c0_g1_i1	AT2G40010.1	8.89e-78	60S acidic ribosomal protein P0-1 [Source:UniProtKB/Swiss-Prot;Acc:O04204]	TRINITY_DN45959_c0_g1_i1	EDP00752	5.43e-75	60S acidic ribosomal protein P0 [Source:UniProtKB/TrEMBL;Acc:A8J5Z0]					TRINITY_DN45959_c0_g1_i1	ENSP00000339027.3	7.68e-97	ribosomal protein lateral stalk subunit P0 [Source:HGNC Symbol;Acc:HGNC:10371]	TRINITY_DN45959_c0_g1_i1	EAN79177	2.5e-51	60S acidic ribosomal subunit protein, putative
TRINITY_DN45970_c0_g1	98	642	6.577	3.41707e-76	99	648	6.546	2.72576e-121	B	TRINITY_DN45970_c0_g1_i1	KWU43512.1	6.84e-128	60S ribosomal protein L7 [Rhodotorula sp. JG-1b]	TRINITY_DN45970_c0_g1_i1	Q6C603.1	2.05e-81	RecName: Full=60S ribosomal protein L7	TRINITY_DN45970_c0_g1_i1	AT2G44120.1	2.13e-69	60S ribosomal protein L7-3 [Source:UniProtKB/TrEMBL;Acc:F4IT48]	TRINITY_DN45970_c0_g1_i1	EDP03542	1.62e-63	Ribosomal protein L7 [Source:UniProtKB/TrEMBL;Acc:A8IVE2]					TRINITY_DN45970_c0_g1_i1	ENSP00000379729.1	1.69e-62	ribosomal protein L7 [Source:HGNC Symbol;Acc:HGNC:10363]	TRINITY_DN45970_c0_g1_i1	AAZ12238	4.05e-42	60S ribosomal protein L7, putative
TRINITY_DN46044_c0_g1	37	258	6.894	1.38486e-76	38	260	6.855	1.24353e-83	B	TRINITY_DN46044_c0_g1_i2	KWU47047.1	9.31e-36	ribosomal protein S25 [Rhodotorula sp. JG-1b]	TRINITY_DN46044_c0_g1_i2	P0C0T4.1	1.2e-18	RecName: Full=40S ribosomal protein S25-B; AltName: Full=RP45; AltName: Full=S31; AltName: Full=Small ribosomal subunit protein eS25-B; AltName: Full=YS23	TRINITY_DN46044_c0_g1_i2	AT2G21580.2	4.59e-14	40S ribosomal protein S25-2 [Source:UniProtKB/Swiss-Prot;Acc:Q9SIK2]	TRINITY_DN46044_c0_g1_i2	EDP02658	2.08e-19	Ribosomal protein S25 [Source:UniProtKB/TrEMBL;Acc:A8IZ36]					TRINITY_DN46044_c0_g1_i2	ENSP00000435096.1	1.37e-16	ribosomal protein S25 [Source:HGNC Symbol;Acc:HGNC:10413]	TRINITY_DN46044_c0_g1_i2	EAN77709	2.06e-11	ribosomal protein S25, putative
TRINITY_DN46247_c0_g2	73	519	7.052	3.82803e-153	74	524	7.022	5.03549e-150	B	TRINITY_DN46247_c0_g2_i3	CEQ39478.1	2.51e-68	SPOSA6832_01009, partial [Sporidiobolus salmonicolor]	TRINITY_DN46247_c0_g2_i1	P27074.2	3.14e-59	RecName: Full=60S ribosomal protein L44 Q; AltName: Full=L41; AltName: Full=L41 Q-type	TRINITY_DN46247_c0_g2_i3	AT4G14320.1	9.29e-53	60S ribosomal protein L36a [Source:UniProtKB/TrEMBL;Acc:F4JUQ4]	TRINITY_DN46247_c0_g2_i3	EDP05070	8.82e-50	60S ribosomal protein L44 [Source:UniProtKB/Swiss-Prot;Acc:P49213]					TRINITY_DN46247_c0_g2_i1	ENSP00000483017.1	1.31e-51	ribosomal protein L36a [Source:HGNC Symbol;Acc:HGNC:10359]	TRINITY_DN46247_c0_g2_i3	AAQ16066	1.3e-40	60S ribosomal protein L44
TRINITY_DN46293_c0_g1	15	169	11.337	7.66117e-65	15	171	11.22	2.98739e-76	B	TRINITY_DN46293_c0_g1_i1	KWU41028.1	0	2-methylcitrate dehydratase [Rhodotorula sp. JG-1b]	TRINITY_DN46293_c0_g1_i1	Q6C354.1	0	RecName: Full=2-methylcitrate dehydratase, mitochondrial; Flags: Precursor													TRINITY_DN46293_c0_g1_i1	ENSP00000401584.1	4.54e-10	aconitate decarboxylase 1 [Source:HGNC Symbol;Acc:HGNC:33904]					LeuA subunit of citrate synthase enzyme can bind to Zn ie Hg can also bind
TRINITY_DN46301_c0_g1	44	264	5.999	1.18199e-68	44	267	5.967	2.80759e-70	B	TRINITY_DN46301_c0_g1_i1	KWU44587.1	3.77e-99	60S ribosomal protein L18 [Rhodotorula sp. JG-1b]	TRINITY_DN46301_c0_g1_i1	Q10192.1	8.27e-59	RecName: Full=60S ribosomal protein L18-A	TRINITY_DN46301_c0_g1_i1	AT3G05590.1	1.15e-46	RPL18 [Source:UniProtKB/TrEMBL;Acc:A0A178V8M9]	TRINITY_DN46301_c0_g1_i1	EDP05331	8.3e-45	Ribosomal protein L18 [Source:UniProtKB/TrEMBL;Acc:A8IKZ2]					TRINITY_DN46301_c0_g1_i2	ENSP00000447001.1	2.57e-37	ribosomal protein L18 [Source:HGNC Symbol;Acc:HGNC:10310]	TRINITY_DN46301_c0_g1_i2	EAN78382	1.24e-31	60S ribosomal protein L18, putative
TRINITY_DN46322_c0_g1	69	452	6.575	2.64775e-40	69	456	6.538	6.60826e-76	B	TRINITY_DN46322_c0_g1_i1	KWU42594.1	2.22e-88	ribosomal protein L32e [Rhodotorula sp. JG-1b]	TRINITY_DN46322_c0_g1_i1	O42935.1	5.91e-55	RecName: Full=60S ribosomal protein L32-B	TRINITY_DN46322_c0_g1_i1	AT4G18100.1	1.21e-43	60S ribosomal protein L32-1 [Source:UniProtKB/Swiss-Prot;Acc:P49211]	TRINITY_DN46322_c0_g1_i1	EDP01775	3.09e-49	Ribosomal protein L32 [Source:UniProtKB/TrEMBL;Acc:A8J2G4]					TRINITY_DN46322_c0_g1_i1	ENSP00000412393.1	1.24e-51	ribosomal protein L32 [Source:HGNC Symbol;Acc:HGNC:10336]	TRINITY_DN46322_c0_g1_i1	EAN77351	4.52e-33	60S ribosomal protein L32
TRINITY_DN46886_c0_g2	191	1266	6.617	9.07389e-97	193	1277	6.59	1.20896e-159	B	TRINITY_DN46886_c0_g2_i1	XP_018268948.1	4.55e-27	hypothetical protein RHOBADRAFT_65549 [Rhodotorula graminis WP1]	TRINITY_DN46886_c0_g2_i1	Q96W55.1	8.8e-23	RecName: Full=60S ribosomal protein L39; AltName: Full=L46	TRINITY_DN46886_c0_g2_i1	AT3G02190.1	1.45e-19	60S ribosomal protein L39-2 [Source:UniProtKB/Swiss-Prot;Acc:Q8L8W6]	TRINITY_DN46886_c0_g2_i1	EDP01854	4.23e-17	Ribosomal protein L39 [Source:UniProtKB/TrEMBL;Acc:A8J1Q3]					TRINITY_DN46886_c0_g2_i1	ENSP00000355315.3	6.91e-20	ribosomal protein L39 [Source:HGNC Symbol;Acc:HGNC:10350]	TRINITY_DN46886_c0_g2_i1	AAZ13290	8.16e-10	60S ribosomal protein L39, putative
TRINITY_DN46945_c0_g1	223	1026	4.606	1.77576e-25	226	1035	4.586	1.53128e-44	B	TRINITY_DN46945_c0_g1_i1	KWU42460.1	2.01e-34	hypothetical protein RHOSPDRAFT_26957 [Rhodotorula sp. JG-1b]	TRINITY_DN46945_c0_g1_i1	P22151.1	2.26e-13	RecName: Full=Glucose-repressible gene protein
TRINITY_DN46945_c0_g2	136	1019	7.492	5.18045e-31	138	1028	7.461	1.28421e-57	B	TRINITY_DN46945_c0_g2_i1	KWU42461.1	2.66e-40	hypothetical protein RHOSPDRAFT_35986 [Rhodotorula sp. JG-1b]	TRINITY_DN46945_c0_g2_i1	P22151.1	2.92e-20	RecName: Full=Glucose-repressible gene protein
TRINITY_DN47249_c0_g2	45	233	5.194	1.06855e-49	45	236	5.171	5.77464e-48	B	TRINITY_DN47249_c0_g2_i2	KWU46851.1	1.39e-134	hypothetical protein RHOSPDRAFT_31672 [Rhodotorula sp. JG-1b]	TRINITY_DN47249_c0_g2_i2	Q10101.2	2.1e-83	RecName: Full=40S ribosomal protein S7	TRINITY_DN47249_c0_g2_i2	AT5G16130.1	1.66e-58	40S ribosomal protein S7-3 [Source:UniProtKB/Swiss-Prot;Acc:Q8LD03]	TRINITY_DN47249_c0_g2_i2	EDO96962	8.18e-62	Ribosomal protein S7 [Source:UniProtKB/TrEMBL;Acc:A8JGI9]					TRINITY_DN47249_c0_g2_i2	ENSP00000385286.1	3.17e-71	ribosomal protein S7 [Source:HGNC Symbol;Acc:HGNC:10440]	TRINITY_DN47249_c0_g2_i2	EAN76481	2.05e-27	ribosomal protein S7, putative
TRINITY_DN47272_c0_g2	14	105	7.377	6.00022e-29	14	106	7.311	6.56378e-28	B	TRINITY_DN47272_c0_g2_i1	KWU43091.1	8.91e-116	hypothetical protein RHOSPDRAFT_11021, partial [Rhodotorula sp. JG-1b]
TRINITY_DN47369_c0_g1	168	952	5.656	1.59509e-52	170	961	5.635	3.38388e-90	B	TRINITY_DN47369_c0_g1_i2	KWU45888.1	3.24e-50	40S ribosomal protein S26E, partial [Rhodotorula sp. JG-1b]	TRINITY_DN47369_c0_g1_i2	P21772.2	6.57e-40	RecName: Full=40S ribosomal protein S26E; AltName: Full=13.6 kDa ribosomal protein; AltName: Full=CRP5	TRINITY_DN47369_c0_g1_i2	AT2G40590.1	7.59e-29	40S ribosomal protein S26 [Source:UniProtKB/TrEMBL;Acc:A0A178VPZ6]	TRINITY_DN47369_c0_g1_i2	EDP04391	7.25e-19	40S ribosomal protein S26 [Source:UniProtKB/TrEMBL;Acc:A8IS22]					TRINITY_DN47369_c0_g1_i2	ENSP00000450339.1	3.66e-27	ribosomal protein S26 [Source:HGNC Symbol;Acc:HGNC:10414]	TRINITY_DN47369_c0_g1_i2	EAN79782	1.54e-17	ribosomal protein S26, putative
TRINITY_DN47378_c0_g1	28	178	6.418	2.72784e-42	28	180	6.384	1.74718e-39	B	TRINITY_DN47378_c0_g1_i1	KWU45868.1	4.8e-46	proteinase inhibitor, propeptide [Rhodotorula sp. JG-1b]	TRINITY_DN47378_c0_g1_i1	O74989.1	1.08e-06	RecName: Full=Uncharacterized protein C338.12
TRINITY_DN47459_c0_g1	104	844	8.116	1.71403e-71	105	852	8.077	1.89002e-124	B	TRINITY_DN47459_c0_g1_i1	KWU41238.1	3.67e-92	60S ribosomal protein L27 [Rhodotorula sp. JG-1b]	TRINITY_DN47459_c0_g1_i1	O74538.1	1.5e-63	RecName: Full=60S ribosomal protein L27-B	TRINITY_DN47459_c0_g1_i1	AT2G32220.1	4.93e-43	60S ribosomal protein L27-1 [Source:UniProtKB/Swiss-Prot;Acc:Q9SKX8]	TRINITY_DN47459_c0_g1_i1	EDP04870	1.07e-48	60S ribosomal protein L27 [Source:UniProtKB/TrEMBL;Acc:A8IQC1]					TRINITY_DN47459_c0_g1_i1	ENSP00000464813.1	9.95e-54	ribosomal protein L27 [Source:HGNC Symbol;Acc:HGNC:10328]	TRINITY_DN47459_c0_g1_i1	EAN80535	3.56e-42	60S ribosomal protein L27, putative
TRINITY_DN47574_c0_g2	142	1006	7.076	5.52932e-45	144	1015	7.048	1.49175e-80	B	TRINITY_DN47574_c0_g2_i1	AEH50080.1	1.76e-115	putative translation initiation factor 5A [Rhodotorula mucilaginosa]	TRINITY_DN47574_c0_g2_i1	O94083.2	2.2e-81	RecName: Full=Eukaryotic translation initiation factor 5A; Short=eIF-5A; AltName: Full=eIF-4D	TRINITY_DN47574_c0_g2_i1	AT1G13950.1	1.98e-58	Eukaryotic translation initiation factor 5A [Source:UniProtKB/TrEMBL;Acc:A0A178WBN7]	TRINITY_DN47574_c0_g2_i1	EDP07536	9.34e-50	Eukaryotic translation initiation factor 5A [Source:UniProtKB/TrEMBL;Acc:A8I297]					TRINITY_DN47574_c0_g2_i1	ENSP00000295822.2	4.31e-67	eukaryotic translation initiation factor 5A2 [Source:HGNC Symbol;Acc:HGNC:3301]	TRINITY_DN47574_c0_g2_i1	EAN79055	2.63e-44	eukaryotic translation initiation factor 5a, putative
TRINITY_DN47920_c0_g1	38	219	5.715	7.76628e-66	38	221	5.681	4.47667e-76	B	TRINITY_DN47920_c0_g1_i1	KWU44455.1	3.54e-83	ribosomal protein S17e [Rhodotorula sp. JG-1b]	TRINITY_DN47920_c0_g1_i1	P27770.1	2.27e-61	RecName: Full=40S ribosomal protein S17; AltName: Full=CRP3	TRINITY_DN47920_c0_g1_i1	AT2G04390.1	1.81e-53	40S ribosomal protein S17-1 [Source:UniProtKB/Swiss-Prot;Acc:P49205]	TRINITY_DN47920_c0_g1_i1	EDO96968	1.66e-54	Ribosomal protein S17 [Source:UniProtKB/TrEMBL;Acc:A8JGK1]					TRINITY_DN47920_c0_g1_i1	ENSP00000346046.5	6.11e-56	ribosomal protein S17 [Source:HGNC Symbol;Acc:HGNC:10397]	TRINITY_DN47920_c0_g1_i1	EAN80133	1.14e-37	40S ribosomal protein S17, putative
TRINITY_DN48267_c0_g1	6532	7102	1.087	0.0133766	6612	7165	1.083	0.030886	B
TRINITY_DN48388_c0_g1	50	306	6.166	5.62551e-85	50	308	6.134	2.96514e-89	B	TRINITY_DN48388_c0_g1_i1	KWU43045.1	3.85e-90	40S ribosomal protein S15 [Rhodotorula sp. JG-1b]	TRINITY_DN48388_c0_g1_i1	P34737.1	4.3e-71	RecName: Full=40S ribosomal protein S15; AltName: Full=S12	TRINITY_DN48388_c0_g1_i1	AT5G09500.1	1.43e-65	40S ribosomal protein S15-3 [Source:UniProtKB/Swiss-Prot;Acc:Q9FY65]	TRINITY_DN48388_c0_g1_i1	EDP01033	1.52e-56	Ribosomal protein S15 [Source:UniProtKB/TrEMBL;Acc:A8J493]	TRINITY_DN48388_c0_g1_i1	BAA17345	4.95e-09	30S ribosomal protein S19	TRINITY_DN48388_c0_g1_i1	ENSP00000467466.3	1.87e-59	ribosomal protein S15 [Source:HGNC Symbol;Acc:HGNC:10388]	TRINITY_DN48388_c0_g1_i1	AAZ12298	3.36e-59	40S ribosomal protein S15, putative
TRINITY_DN48603_c0_g1	149	981	6.594	5.33819e-27	150	990	6.572	6.47713e-48	B	TRINITY_DN48603_c0_g1_i4	KWU42080.1	1.85e-38	60S ribosomal protein L37a [Rhodotorula sp. JG-1b]	TRINITY_DN48603_c0_g1_i4	Q54UG4.1	4.84e-28	RecName: Full=60S ribosomal protein L37a	TRINITY_DN48603_c0_g1_i4	AT3G10950.1	1.92e-24	Putative 60S ribosomal protein L37a-1 [Source:UniProtKB/Swiss-Prot;Acc:Q9SRK6]	TRINITY_DN48603_c0_g1_i4	EDP08593	2.93e-26	Ribosomal protein L37a [Source:UniProtKB/TrEMBL;Acc:A8HY08]					TRINITY_DN48603_c0_g1_i4	ENSP00000418082.1	1.19e-25	ribosomal protein L37a [Source:HGNC Symbol;Acc:HGNC:10348]	TRINITY_DN48603_c0_g1_i4	EAN77454	1.2e-20	60S ribosomal protein L37a, putative
TRINITY_DN48610_c0_g2	38	216	5.705	1.09522e-55	38	218	5.673	8.98629e-58	B	TRINITY_DN48610_c0_g2_i1	KWU41198.1	3.18e-152	40S ribosomal protein S2 [Rhodotorula sp. JG-1b]	TRINITY_DN48610_c0_g2_i1	O74892.1	2.04e-117	RecName: Full=40S ribosomal protein S2	TRINITY_DN48610_c0_g2_i1	AT3G57490.1	3.56e-109	40S ribosomal protein S2-4 [Source:UniProtKB/Swiss-Prot;Acc:Q9SCM3]	TRINITY_DN48610_c0_g2_i1	EDP09408	6.78e-109	Ribosomal protein S2 [Source:UniProtKB/TrEMBL;Acc:A8HME4]	TRINITY_DN48610_c0_g2_i1	BAA17333	1.87e-12	30S ribosomal protein S5	TRINITY_DN48610_c0_g2_i1	ENSP00000341885.4	3.86e-114	ribosomal protein S2 [Source:HGNC Symbol;Acc:HGNC:10404]	TRINITY_DN48610_c0_g2_i1	EAN78827	3.13e-96	40S ribosomal protein S2, putative
TRINITY_DN48711_c0_g1	40	399	9.985	5.73585e-133	40	403	9.931	4.25615e-144	B	TRINITY_DN48711_c0_g1_i1	KWU41481.1	6.61e-115	putative cyclophilin [Rhodotorula sp. JG-1b]	TRINITY_DN48711_c0_g1_i2	P18253.1	7.62e-88	RecName: Full=Peptidyl-prolyl cis-trans isomerase; Short=PPIase; AltName: Full=Cyclophilin; Short=CPH; AltName: Full=Cyclosporin A-binding protein; AltName: Full=Rotamase	TRINITY_DN48711_c0_g1_i2	AT5G58710.1	7.05e-74	Peptidyl-prolyl cis-trans isomerase [Source:UniProtKB/TrEMBL;Acc:A0A178UBF4]	TRINITY_DN48711_c0_g1_i2	EDO98214	1.77e-78	Peptidyl-prolyl cis-trans isomerase [Source:UniProtKB/TrEMBL;Acc:A8JD64]	TRINITY_DN48711_c0_g1_i2	BAA17841	2.05e-75	peptidyl-prolyl cis-trans isomerase	TRINITY_DN48711_c0_g1_i2	ENSP00000419425.1	1.4e-80	peptidylprolyl isomerase A [Source:HGNC Symbol;Acc:HGNC:9253]	TRINITY_DN48711_c0_g1_i2	EAN79069	2.18e-71	cyclophilin a
TRINITY_DN48760_c0_g1	14	170	12.058	9.2317e-06	14	171	11.91	4.00177e-15	B
TRINITY_DN48804_c0_g1	59	316	5.328	7.38466e-69	60	320	5.305	4.77219e-66	B	TRINITY_DN48804_c0_g1_i2	KWU46766.1	8.77e-175	ribosomal protein S3 [Rhodotorula sp. JG-1b]	TRINITY_DN48804_c0_g1_i2	Q9SIP7.1	8.87e-122	RecName: Full=40S ribosomal protein S3-1	TRINITY_DN48804_c0_g1_i2	AT2G31610.1	1.05e-122	40S ribosomal protein S3-1 [Source:UniProtKB/Swiss-Prot;Acc:Q9SIP7]	TRINITY_DN48804_c0_g1_i2	EDP07493	7.96e-117	Ribosomal protein S3 [Source:UniProtKB/TrEMBL;Acc:A8I4P5]					TRINITY_DN48804_c0_g1_i2	ENSP00000433821.1	4.67e-119	ribosomal protein S3 [Source:HGNC Symbol;Acc:HGNC:10420]	TRINITY_DN48804_c0_g1_i2	EAN78533	3.51e-84	40S ribosomal protein S3, putative
TRINITY_DN48859_c0_g1	4392	5086	1.158	5.20263e-07	4446	5131	1.154	1.37738e-05	B	TRINITY_DN48859_c0_g1_i1	CUG86074.1	7.8e-35	small ubiquitin protein, putative [Bodo saltans]	TRINITY_DN48859_c0_g1_i1	P55857.1	1.15e-24	RecName: Full=Small ubiquitin-related modifier 1; Short=OsSUMO1; AltName: Full=Ubiquitin-like protein SMT3	TRINITY_DN48859_c0_g1_i1	AT5G55160.1	1.65e-25	Small ubiquitin-related modifier [Source:UniProtKB/TrEMBL;Acc:F4K3D6]	TRINITY_DN48859_c0_g1_i1	EDP01119	2.97e-22	Small ubiquitin-related modifier [Source:UniProtKB/TrEMBL;Acc:A8J3A7]					TRINITY_DN48859_c0_g1_i1	ENSP00000330343.6	1.66e-23	small ubiquitin-like modifier 3 [Source:HGNC Symbol;Acc:HGNC:11124]	TRINITY_DN48859_c0_g1_i1	AAZ11434	6.91e-33	small ubiquitin protein, putative
TRINITY_DN49268_c0_g1	14	129	8.933	1.69219e-44	14	130	8.846	2.45683e-47	B	TRINITY_DN49268_c0_g1_i1	KWU41822.1	3.46e-48	CipC protein [Rhodotorula sp. JG-1b]
TRINITY_DN49384_c0_g1	38	212	5.643	5.3812e-61	38	214	5.611	4.68973e-69	B	TRINITY_DN49384_c0_g1_i1	KWU42965.1	0	60S ribosomal protein L3 [Rhodotorula sp. JG-1b]	TRINITY_DN49384_c0_g1_i2	Q8NKF4.2	0	RecName: Full=60S ribosomal protein L3; AltName: Allergen=Asp f 23	TRINITY_DN49384_c0_g1_i2	AT1G61580.1	2.22e-161	60S ribosomal protein L3-2 [Source:UniProtKB/Swiss-Prot;Acc:P22738]	TRINITY_DN49384_c0_g1_i2	EDP06420	8.97e-171	Ribosomal protein L3 [Source:UniProtKB/TrEMBL;Acc:A8ID84]					TRINITY_DN49384_c0_g1_i2	ENSP00000346001.3	1.4e-165	ribosomal protein L3 [Source:HGNC Symbol;Acc:HGNC:10332]	TRINITY_DN49384_c0_g1_i2	AAZ10770	6.86e-147	ribosomal protein L3, putative
TRINITY_DN49584_c0_g1	24	245	10.178	4.38954e-22	24	248	10.075	1.49575e-51	B	TRINITY_DN49584_c0_g1_i2	KWU46180.1	1.43e-44	hypothetical protein RHOSPDRAFT_32175 [Rhodotorula sp. JG-1b]	TRINITY_DN49584_c0_g1_i1	O94705.3	8.3e-07	RecName: Full=Cytochrome c oxidase subunit 7A; AltName: Full=Cytochrome c oxidase polypeptide VIIA; Flags: Precursor
TRINITY_DN49938_c0_g1	92	540	5.878	2.10886e-126	93	545	5.856	2.20869e-114	B	TRINITY_DN49938_c0_g1_i2	KWU46495.1	3.68e-24	hypothetical protein RHOSPDRAFT_31952 [Rhodotorula sp. JG-1b]	TRINITY_DN49938_c0_g1_i3	P0CT62.1	1.43e-13	RecName: Full=40S ribosomal protein S30-A	TRINITY_DN49938_c0_g1_i3	AT4G29390.1	2.07e-08	40S ribosomal protein S30 [Source:UniProtKB/Swiss-Prot;Acc:P49689]	TRINITY_DN49938_c0_g1_i3	EDO97461	2.6e-11	40S ribosomal protein S30 [Source:UniProtKB/TrEMBL;Acc:A8JF66]					TRINITY_DN49938_c0_g1_i3	ENSP00000436110.1	3.84e-08	FAU, ubiquitin like and ribosomal protein S30 fusion [Source:HGNC Symbol;Acc:HGNC:3597]	TRINITY_DN49938_c0_g1_i2	AAZ11772	6.7e-14	40S ribosomal protein S30, putative
TRINITY_DN49997_c0_g1	114	739	6.505	6.19855e-45	115	746	6.477	2.61472e-81	B	TRINITY_DN49997_c0_g1_i3	OBS27359.1	7.89e-32	hypothetical protein FPOA_01302 [Fusarium poae]	TRINITY_DN49997_c0_g1_i3	Q7S6W5.1	8.87e-29	RecName: Full=40S ribosomal protein S28	TRINITY_DN49997_c0_g1_i1	AT3G10090.1	5.44e-13	40S ribosomal protein S28-1 [Source:UniProtKB/Swiss-Prot;Acc:Q9SR73]	TRINITY_DN49997_c0_g1_i1	EDP05500	2.59e-18	Ribosomal protein S28 [Source:UniProtKB/TrEMBL;Acc:A8IKP1]					TRINITY_DN49997_c0_g1_i3	ENSP00000472469.1	7.06e-21	ribosomal protein S28 [Source:HGNC Symbol;Acc:HGNC:10418]	TRINITY_DN49997_c0_g1_i1	AAZ12089	4.06e-11	40S ribosomal protein S33, putative
TRINITY_DN50032_c0_g1	136	850	6.251	7.97565e-42	137	857	6.227	1.04987e-74	B	TRINITY_DN50032_c0_g1_i1	KWU44805.1	1.11e-58	hypothetical protein RHOSPDRAFT_29056 [Rhodotorula sp. JG-1b]	TRINITY_DN50032_c0_g1_i1	P49166.2	1.11e-41	RecName: Full=60S ribosomal protein L37-A; AltName: Full=L43; AltName: Full=Large ribosomal subunit protein eL37-A; AltName: Full=YL35; AltName: Full=YP55	TRINITY_DN50032_c0_g1_i1	AT1G52300.1	2.34e-35	60S ribosomal protein L37-2 [Source:UniProtKB/Swiss-Prot;Acc:Q43292]	TRINITY_DN50032_c0_g1_i1	EDP06293	3.38e-35	Ribosomal protein L37 [Source:UniProtKB/TrEMBL;Acc:A8IBG1]					TRINITY_DN50032_c0_g1_i1	ENSP00000274242.5	2.41e-32	ribosomal protein L37 [Source:HGNC Symbol;Acc:HGNC:10347]	TRINITY_DN50032_c0_g1_i1	EAN76901	1.52e-21	60S ribosomal protein L37, putative
TRINITY_DN50226_c0_g1	219	1369	6.241	5.05749e-43	222	1382	6.221	8.41686e-78	B	TRINITY_DN50226_c0_g1_i1	KWU47139.1	1.91e-54	hypothetical protein RHOSPDRAFT_28164 [Rhodotorula sp. JG-1b]	TRINITY_DN50226_c0_g1_i1	O74330.1	4.67e-44	RecName: Full=40S ribosomal protein S27	TRINITY_DN50226_c0_g1_i1	AT3G61110.1	3.6e-42	40S ribosomal protein S27 [Source:UniProtKB/TrEMBL;Acc:A0A178VC05]	TRINITY_DN50226_c0_g1_i1	EDP00546	8.27e-43	40S ribosomal protein S27 [Source:UniProtKB/TrEMBL;Acc:A8J576]					TRINITY_DN50226_c0_g1_i1	ENSP00000357555.4	3.67e-40	ribosomal protein S27 [Source:HGNC Symbol;Acc:HGNC:10416]	TRINITY_DN50226_c0_g1_i1	EAN79924	4.62e-29	40S ribosomal protein S27, putative
TRINITY_DN50324_c0_g1	5774	6317	1.094	0.00731265	5846	6373	1.09	0.0250609	B
TRINITY_DN50350_c0_g1	59	394	6.639	3.17055e-45	60	398	6.6	2.57659e-82	B	TRINITY_DN50350_c0_g1_i3	KWU47400.1	2.48e-176	ribosomal protein L2 [Rhodotorula sp. JG-1b]	TRINITY_DN50350_c0_g1_i3	Q75AP7.1	2.22e-127	RecName: Full=60S ribosomal protein L2	TRINITY_DN50350_c0_g1_i3	AT2G18020.1	4.68e-119	EMB2296 [Source:UniProtKB/TrEMBL;Acc:A0A178VSS0]	TRINITY_DN50350_c0_g1_i3	EDP03554	4.93e-119	Ribosomal protein L8 [Source:UniProtKB/TrEMBL;Acc:A8IVK1]	TRINITY_DN50350_c0_g1_i3	BAA17346	2.06e-23	50S ribosomal protein L2	TRINITY_DN50350_c0_g1_i3	ENSP00000433464.2	6.29e-117	ribosomal protein L8 [Source:HGNC Symbol;Acc:HGNC:10368]	TRINITY_DN50350_c0_g1_i3	AAZ11226	8.53e-107	60S ribosomal protein L2, putative
TRINITY_DN50365_c0_g1	133	797	5.978	2.30972e-52	135	804	5.953	4.23605e-88	B	TRINITY_DN50365_c0_g1_i4	KWU44769.1	3.05e-178	ribosomal protein S4e [Rhodotorula sp. JG-1b]	TRINITY_DN50365_c0_g1_i4	P87158.2	9.32e-140	RecName: Full=40S ribosomal protein S4-A	TRINITY_DN50365_c0_g1_i4	AT5G07090.1	1.92e-122	40S ribosomal protein S4-2 [Source:UniProtKB/Swiss-Prot;Acc:P49204]	TRINITY_DN50365_c0_g1_i4	EDP04951	5.4e-119	40S ribosomal protein S4 [Source:UniProtKB/TrEMBL;Acc:A8IMP6]					TRINITY_DN50365_c0_g1_i4	ENSP00000250784.7	3.84e-128	ribosomal protein S4, Y-linked 1 [Source:HGNC Symbol;Acc:HGNC:10425]	TRINITY_DN50365_c0_g1_i4	EAN79329	8.48e-92	40S ribosomal protein S4, putative
TRINITY_DN50370_c0_g1	36	149	4.191	6.02512e-31	36	151	4.168	2.14281e-30	B	TRINITY_DN50370_c0_g1_i2	KWU44557.1	2.9e-67	eukaryotic translation initiation factor eIF-1A [Rhodotorula sp. JG-1b]	TRINITY_DN50370_c0_g1_i2	P55877.2	1.01e-54	RecName: Full=Eukaryotic translation initiation factor 1A; Short=eIF-1A; AltName: Full=Eukaryotic translation initiation factor 4C; Short=eIF-4C	TRINITY_DN50370_c0_g1_i2	AT2G04520.1	4.08e-47	OB-fold nucleic acid binding domain-containing protein [Source:UniProtKB/TrEMBL;Acc:Q9SJB9]	TRINITY_DN50370_c0_g1_i2	EDP07477	9.89e-49	Eukaryotic initiation factor [Source:UniProtKB/TrEMBL;Acc:A8I4H4]					TRINITY_DN50370_c0_g1_i2	ENSP00000368927.5	9.07e-55	eukaryotic translation initiation factor 1A, X-linked [Source:HGNC Symbol;Acc:HGNC:3250]	TRINITY_DN50370_c0_g1_i2	AAZ13352	9.99e-20	eukaryotic translation initiation factor 1A, putative
TRINITY_DN50421_c0_g1	66	492	7.456	2.78652e-42	67	496	7.416	1.27112e-82	B	TRINITY_DN50421_c0_g1_i2	KWU42862.1	7.58e-75	hypothetical protein RHOSPDRAFT_20413, partial [Rhodotorula sp. JG-1b]	TRINITY_DN50421_c0_g1_i3	P51997.2	9.24e-58	RecName: Full=60S ribosomal protein L25	TRINITY_DN50421_c0_g1_i3	AT3G55280.3	9.16e-41	60S ribosomal protein L23a-2 [Source:UniProtKB/Swiss-Prot;Acc:Q9M3C3]	TRINITY_DN50421_c0_g1_i3	EDP01709	7.24e-45	Ribosomal protein L23a [Source:UniProtKB/TrEMBL;Acc:A8J239]					TRINITY_DN50421_c0_g1_i3	ENSP00000468402.1	8.88e-47	ribosomal protein L23a [Source:HGNC Symbol;Acc:HGNC:10317]	TRINITY_DN50421_c0_g1_i3	AAZ12581	4.65e-35	60S ribosomal protein L23a
TRINITY_DN50426_c0_g1	29	141	4.881	3.68822e-35	29	142	4.85	2.138e-35	B	TRINITY_DN50426_c0_g1_i2	KWU41934.1	0	S-adenosyl-L-methionine-dependent methyltransferase [Rhodotorula sp. JG-1b]	TRINITY_DN50426_c0_g1_i2	O36033.2	2.37e-27	RecName: Full=TPR repeat-containing protein C19B12.01	TRINITY_DN50426_c0_g1_i2	AT2G41380.1	7.83e-06	At2g41380 [Source:UniProtKB/TrEMBL;Acc:Q9ZVC3]									TRINITY_DN50426_c0_g1_i2	ENSP00000313953.4	7.82e-09	tetratricopeptide repeat domain 27 [Source:HGNC Symbol;Acc:HGNC:25986]
TRINITY_DN50733_c0_g1	73	286	3.908	3.37475e-61	74	289	3.89	4.64772e-68	B	TRINITY_DN50733_c0_g1_i1	KWU45467.1	0	hypothetical protein RHOSPDRAFT_33087 [Rhodotorula sp. JG-1b]	TRINITY_DN50733_c0_g1_i3	P51508.3	3.45e-07	RecName: Full=Zinc finger protein 81; AltName: Full=HFZ20													TRINITY_DN50733_c0_g1_i3	ENSP00000341151.7	7.54e-08	zinc finger protein 81 [Source:HGNC Symbol;Acc:HGNC:13156]
TRINITY_DN50880_c0_g1	55	346	6.279	2.19766e-39	55	348	6.242	3.03519e-69	B	TRINITY_DN50880_c0_g1_i2	KWU42744.1	0	hypothetical protein RHOSPDRAFT_35692 [Rhodotorula sp. JG-1b]	TRINITY_DN50880_c0_g1_i2	P52822.2	8.14e-126	RecName: Full=60S ribosomal protein L5-A	TRINITY_DN50880_c0_g1_i2	AT5G39740.2	1.54e-98	RPL5B [Source:UniProtKB/TrEMBL;Acc:A0A178UJU5]	TRINITY_DN50880_c0_g1_i2	EDP09597	6.77e-102	Ribosomal protein L5 [Source:UniProtKB/TrEMBL;Acc:A8HP55]					TRINITY_DN50880_c0_g1_i2	ENSP00000359345.2	5.59e-99	ribosomal protein L5 [Source:HGNC Symbol;Acc:HGNC:10360]	TRINITY_DN50880_c0_g1_i2	EAN77331	2.75e-93	60S ribosomal protein L5, putative
TRINITY_DN50924_c0_g2	110	707	6.399	9.78133e-48	112	714	6.371	8.10636e-86	B	TRINITY_DN50924_c0_g2_i1	XP_016275125.1	1.95e-81	40S ribosomal protein s23 [Rhodotorula toruloides NP11]	TRINITY_DN50924_c0_g2_i1	Q9HE74.1	3.58e-76	RecName: Full=40S ribosomal protein S23; AltName: Full=Cytoplasmic ribosomal protein 28	TRINITY_DN50924_c0_g2_i1	AT5G02960.1	5.61e-62	40S ribosomal protein S23-2 [Source:UniProtKB/Swiss-Prot;Acc:P49201]	TRINITY_DN50924_c0_g2_i1	EDP05439	4.85e-59	Ribosomal protein S23 [Source:UniProtKB/TrEMBL;Acc:A8IJQ4]	TRINITY_DN50924_c0_g2_i1	BAA18324	2.41e-07	30S ribosomal protein S12	TRINITY_DN50924_c0_g2_i1	ENSP00000296674.8	7.82e-65	ribosomal protein S23 [Source:HGNC Symbol;Acc:HGNC:10410]	TRINITY_DN50924_c0_g2_i1	EAN77538	1.12e-57	40S ribosomal protein S23, putative
TRINITY_DN51126_c0_g1	81	574	7.044	8.78511e-54	82	579	7.009	7.09987e-95	B	TRINITY_DN51126_c0_g1_i3	KWU41858.1	2.26e-52	ribosomal protein L38e, partial [Rhodotorula sp. JG-1b]	TRINITY_DN51126_c0_g1_i3	Q7Q0U1.2	8.68e-21	RecName: Full=60S ribosomal protein L38	TRINITY_DN51126_c0_g1_i3	AT3G59540.1	2.86e-21	60S ribosomal protein L38 [Source:UniProtKB/Swiss-Prot;Acc:O22860]	TRINITY_DN51126_c0_g1_i3	EDO96835	3.26e-24	60S ribosomal protein L38 [Source:UniProtKB/TrEMBL;Acc:Q8GUQ9]					TRINITY_DN51126_c0_g1_i3	ENSP00000434243.1	4.89e-18	ribosomal protein L38 [Source:HGNC Symbol;Acc:HGNC:10349]	TRINITY_DN51126_c0_g1_i3	EAN77751	4.25e-15	60S ribosomal proteins L38, putative
TRINITY_DN51158_c0_g2	73	393	5.352	1.2951e-28	74	396	5.327	4.24004e-54	B	TRINITY_DN51158_c0_g2_i1	KWU44373.1	7.96e-100	hypothetical protein RHOSPDRAFT_34164 [Rhodotorula sp. JG-1b]	TRINITY_DN51158_c0_g2_i1	Q9UUC1.1	2.81e-70	RecName: Full=60S ribosomal protein L21-A	TRINITY_DN51158_c0_g2_i1	AT1G09690.1	1.8e-45	60S ribosomal protein L21-1 [Source:UniProtKB/Swiss-Prot;Acc:Q43291]	TRINITY_DN51158_c0_g2_i1	EDO99609	8.03e-45	Ribosomal protein L21 [Source:UniProtKB/TrEMBL;Acc:A8J951]					TRINITY_DN51158_c0_g2_i1	ENSP00000370569.1	1.45e-48	ribosomal protein L21 [Source:HGNC Symbol;Acc:HGNC:10313]	TRINITY_DN51158_c0_g2_i1	EAN79048	2.19e-35	ribosomal protein L21E (60S), putative
TRINITY_DN51425_c1_g1	145	858	5.922	2.7853e-48	146	866	5.9	2.39642e-84	B	TRINITY_DN51425_c1_g1_i2	KWU46739.1	3.68e-97	ribosomal protein S13 [Rhodotorula sp. JG-1b]	TRINITY_DN51425_c1_g1_i5	Q8ISP0.1	7.56e-73	RecName: Full=40S ribosomal protein S18	TRINITY_DN51425_c1_g1_i5	AT1G22780.1	1.39e-67	40S ribosomal protein S18 [Source:UniProtKB/Swiss-Prot;Acc:P34788]	TRINITY_DN51425_c1_g1_i5	EDP08449	2.55e-64	Ribosomal protein S18 [Source:UniProtKB/TrEMBL;Acc:A8HVP2]					TRINITY_DN51425_c1_g1_i2	ENSP00000393241.2	4.83e-70	ribosomal protein S18 [Source:HGNC Symbol;Acc:HGNC:10401]	TRINITY_DN51425_c1_g1_i5	EAN77950	4.87e-57	40S ribosomal protein S18, putative
TRINITY_DN51553_c0_g1	135	693	5.129	5.69172e-59	136	699	5.107	5.24548e-93	B	TRINITY_DN51553_c0_g1_i4	XP_016275779.1	3.87e-110	60S ribosomal protein l15 [Rhodotorula toruloides NP11]	TRINITY_DN51553_c0_g1_i4	Q8X034.1	1.02e-99	RecName: Full=60S ribosomal protein L15	TRINITY_DN51553_c0_g1_i4	AT4G16720.1	8.18e-85	Ribosomal protein L15 [Source:UniProtKB/TrEMBL;Acc:A0A178V5T1]	TRINITY_DN51553_c0_g1_i4	EDP06755	8.52e-84	Ribosomal protein L15 [Source:UniProtKB/TrEMBL;Acc:A8I982]					TRINITY_DN51553_c0_g1_i4	ENSP00000483260.1	9.45e-82	ribosomal protein L15 [Source:HGNC Symbol;Acc:HGNC:10306]	TRINITY_DN51553_c0_g1_i4	EAN77333	1.06e-61	ribosomal protein L15, putative
TRINITY_DN51722_c0_g1	71	485	6.777	3.75366e-53	72	489	6.74	2.05409e-91	B	TRINITY_DN51722_c0_g1_i1	KWU41776.1	2.1e-88	hypothetical protein RHOSPDRAFT_36664 [Rhodotorula sp. JG-1b]	TRINITY_DN51722_c0_g1_i1	P02406.3	4.88e-66	RecName: Full=60S ribosomal protein L28; AltName: Full=L27a; AltName: Full=L29; AltName: Full=Large ribosomal subunit protein uL15; AltName: Full=RP44; AltName: Full=RP62; AltName: Full=YL24	TRINITY_DN51722_c0_g1_i1	AT1G70600.1	8.18e-49	60S ribosomal protein L27a-3 [Source:UniProtKB/Swiss-Prot;Acc:P49637]	TRINITY_DN51722_c0_g1_i1	EDP07350	9.87e-54	Ribosomal protein L27a [Source:UniProtKB/TrEMBL;Acc:A8I2T0]					TRINITY_DN51722_c0_g1_i1	ENSP00000346015.5	9.61e-54	ribosomal protein L27a [Source:HGNC Symbol;Acc:HGNC:10329]	TRINITY_DN51722_c0_g1_i1	EAN77081	1.63e-45	60S ribosomal protein L27a
TRINITY_DN51797_c0_g1	23	187	8.017	1.54448e-65	23	189	7.955	1.9287e-76	B	TRINITY_DN51797_c0_g1_i1	XP_018271163.1	0	hypothetical protein RHOBADRAFT_64911 [Rhodotorula graminis WP1]	TRINITY_DN51797_c0_g1_i1	P37211.1	0	RecName: Full=ATP synthase subunit alpha, mitochondrial; Flags: Precursor	TRINITY_DN51797_c0_g1_i1	ATMG01190.1	0	ATP synthase subunit alpha [Source:UniProtKB/TrEMBL;Acc:G1C2Z0]	TRINITY_DN51797_c0_g1_i1	EDP07337	0	ATP synthase subunit alpha [Source:UniProtKB/TrEMBL;Acc:Q96550]	TRINITY_DN51797_c0_g1_i1	BAA16735	0	ATP synthase a subunit	TRINITY_DN51797_c0_g1_i1	ENSP00000381736.5	0	ATP synthase, H+ transporting, mitochondrial F1 complex, alpha subunit 1, cardiac muscle [Source:HGNC Symbol;Acc:HGNC:823]	TRINITY_DN51797_c0_g1_i1	AAZ12803	2.46e-128	ATP synthase alpha chain, mitochondrial precursor
TRINITY_DN51900_c0_g1	26	212	8.112	3.01255e-71	26	214	8.051	9.24839e-80	B	TRINITY_DN51900_c0_g1_i1	XP_016273595.1	2.62e-22	cytochrome c oxidase, subunit VIIa [Rhodotorula toruloides NP11]	TRINITY_DN51900_c0_g1_i1	Q757F0.3	7.51e-09	RecName: Full=Cytochrome c oxidase subunit 7A; AltName: Full=Cytochrome c oxidase polypeptide VIIA; Flags: Precursor
TRINITY_DN51902_c0_g1	134	70	-1.90476	2.91319e-05	135	71	-1.91205	5.46782e-05	B
TRINITY_DN51903_c0_g1	143	82	-1.74825	0.000548292	145	82	-1.75439	0.000905926	B
TRINITY_DN52200_c0_g1	114	733	6.406	2.67881e-44	116	740	6.38	1.14043e-80	B	TRINITY_DN52200_c0_g1_i2	KWU46386.1	1.6e-78	ribosomal protein L22e, partial [Rhodotorula sp. JG-1b]	TRINITY_DN52200_c0_g1_i4	Q09668.3	7.59e-37	RecName: Full=60S ribosomal protein L22	TRINITY_DN52200_c0_g1_i2	AT3G05560.1	3.17e-22	60S ribosomal protein L22-2 [Source:UniProtKB/Swiss-Prot;Acc:Q9M9W1]	TRINITY_DN52200_c0_g1_i4	EDO96428	2.33e-23	Ribosomal protein L22 [Source:UniProtKB/TrEMBL;Acc:A8JI94]					TRINITY_DN52200_c0_g1_i4	ENSP00000346088.3	1.34e-21	ribosomal protein L22 [Source:HGNC Symbol;Acc:HGNC:10315]	TRINITY_DN52200_c0_g1_i4	EAN79968	2.4e-23	60S ribosomal protein L22, putative
TRINITY_DN52214_c0_g1	7283	7970	1.094	0.00109275	7373	8040	1.09	0.00772438	B	TRINITY_DN52214_c0_g1_i1	XP_021339481.1	1.1e-33	60S ribosomal protein L44 [Mizuhopecten yessoensis]	TRINITY_DN52214_c0_g1_i1	P0CX28.1	1.21e-33	RecName: Full=60S ribosomal protein L42-B; AltName: Full=L41; AltName: Full=Large ribosomal subunit protein eL42-B; AltName: Full=Maintenance of killer protein 18; AltName: Full=YL27; AltName: Full=YP44	TRINITY_DN52214_c0_g1_i1	AT4G14320.1	2.11e-32	60S ribosomal protein L36a [Source:UniProtKB/TrEMBL;Acc:F4JUQ4]	TRINITY_DN52214_c0_g1_i1	EDP05070	1.4e-28	60S ribosomal protein L44 [Source:UniProtKB/Swiss-Prot;Acc:P49213]					TRINITY_DN52214_c0_g1_i1	ENSP00000483017.1	5.92e-27	ribosomal protein L36a [Source:HGNC Symbol;Acc:HGNC:10359]	TRINITY_DN52214_c0_g1_i1	AAQ16066	4.16e-32	60S ribosomal protein L44
TRINITY_DN52216_c0_g1	3138	3485	1.111	0.00186371	3176	3516	1.107	0.0078972	B	TRINITY_DN52216_c0_g1_i1	ABK21356.1	8.72e-48	unknown [Picea sitchensis]	TRINITY_DN52216_c0_g1_i1	P40978.1	3.75e-49	RecName: Full=40S ribosomal protein S19	TRINITY_DN52216_c0_g1_i1	AT5G15520.1	3.57e-48	40S ribosomal protein S19-2 [Source:UniProtKB/Swiss-Prot;Acc:Q9LF30]	TRINITY_DN52216_c0_g1_i3	EDP07442	4.24e-43	Ribosomal protein S19 [Source:UniProtKB/TrEMBL;Acc:A8I403]					TRINITY_DN52216_c0_g1_i1	ENSP00000470004.1	4.77e-40	ribosomal protein S19 [Source:HGNC Symbol;Acc:HGNC:10402]	TRINITY_DN52216_c0_g1_i1	AAZ10777	1.68e-29	ribosomal protein S19, putative
TRINITY_DN52345_c0_g1	74	478	6.503	1.11758e-117	74	483	6.475	1.00803e-109	B	TRINITY_DN52345_c0_g1_i1	KWU42171.1	0	guanine nucleotide binding protein beta subunit [Rhodotorula sp. JG-1b]	TRINITY_DN52345_c0_g1_i3	Q01369.1	1.18e-172	RecName: Full=Guanine nucleotide-binding protein subunit beta-like protein; AltName: Full=Cross-pathway control WD-repeat protein cpc-2	TRINITY_DN52345_c0_g1_i3	AT1G18080.1	2.13e-143	RACK1A_AT [Source:UniProtKB/TrEMBL;Acc:A0A178WHX3]	TRINITY_DN52345_c0_g1_i3	EDO99650	2.6e-149	Receptor of activated protein kinase C 1 [Source:UniProtKB/TrEMBL;Acc:A8J8Y1]	TRINITY_DN52345_c0_g1_i3	BAA10064	2.56e-26	beta transducin-like protein	TRINITY_DN52345_c0_g1_i3	ENSP00000426909.1	4.37e-165	receptor for activated C kinase 1 [Source:HGNC Symbol;Acc:HGNC:4399]	TRINITY_DN52345_c0_g1_i3	EAN80090	2.25e-116	guanine nucleotide-binding protein beta subunit-like protein
TRINITY_DN52355_c0_g2	146	960	6.588	9.43521e-107	147	969	6.561	6.16028e-158	B	TRINITY_DN52355_c0_g2_i1	KWU46165.1	2.05e-157	ribosomal protein L10e, partial [Rhodotorula sp. JG-1b]	TRINITY_DN52355_c0_g2_i1	Q09127.2	1.47e-117	RecName: Full=60S ribosomal protein L10-A; AltName: Full=QM protein homolog; AltName: Full=SpQM	TRINITY_DN52355_c0_g2_i1	AT1G66580.1	1.43e-106	60S ribosomal protein L10-3 [Source:UniProtKB/Swiss-Prot;Acc:Q93W22]	TRINITY_DN52355_c0_g2_i1	EDP02423	9.01e-100	Ribosomal protein L10 [Source:UniProtKB/TrEMBL;Acc:A8IZK3]					TRINITY_DN52355_c0_g2_i1	ENSP00000413436.2	5.13e-111	ribosomal protein L10 [Source:HGNC Symbol;Acc:HGNC:10298]	TRINITY_DN52355_c0_g2_i1	EAN76820	1.43e-100	60S ribosomal protein L10, putative
TRINITY_DN52609_c0_g1	62	348	5.588	5.93551e-32	63	351	5.558	2.94184e-59	B	TRINITY_DN52609_c0_g1_i1	KWU46525.1	1.22e-144	ribosomal protein L16a [Rhodotorula sp. JG-1b]	TRINITY_DN52609_c0_g1_i1	Q9P720.1	2.21e-96	RecName: Full=60S ribosomal protein L16; AltName: Full=Cytoplasmic ribosomal protein 46	TRINITY_DN52609_c0_g1_i1	AT3G24830.1	1.23e-68	60S ribosomal protein L13a-2 [Source:UniProtKB/Swiss-Prot;Acc:Q9LRX8]	TRINITY_DN52609_c0_g1_i1	EDP03478	1.74e-68	Ribosomal protein L13a [Source:UniProtKB/TrEMBL;Acc:A8IVU0]	TRINITY_DN52609_c0_g1_i1	BAA17322	8.58e-06	50S ribosomal protein L13	TRINITY_DN52609_c0_g1_i1	ENSP00000375730.4	2.55e-74	ribosomal protein L13a [Source:HGNC Symbol;Acc:HGNC:10304]	TRINITY_DN52609_c0_g1_i1	AAZ11276	8.5e-41	60S ribosomal protein L13a, putative
TRINITY_DN52683_c0_g2	36	207	5.761	1.24935e-59	36	210	5.726	1.00902e-65	B	TRINITY_DN52683_c0_g2_i2	KWU42584.1	1.47e-144	peroxiredoxin [Rhodotorula sp. JG-1b]	TRINITY_DN52683_c0_g2_i2	Q9BGI3.1	1.58e-91	RecName: Full=Peroxiredoxin-2	TRINITY_DN52683_c0_g2_i2	AT3G11630.1	6.56e-67	2-Cys peroxiredoxin BAS1, chloroplastic [Source:UniProtKB/Swiss-Prot;Acc:Q96291]	TRINITY_DN52683_c0_g2_i2	EDP07356	2.42e-87	2-cys peroxiredoxin [Source:UniProtKB/TrEMBL;Acc:A8I2V3]	TRINITY_DN52683_c0_g2_i2	BAA10136	2.32e-72	thiol-specific antioxidant protein	TRINITY_DN52683_c0_g2_i2	ENSP00000301522.2	2.12e-91	peroxiredoxin 2 [Source:HGNC Symbol;Acc:HGNC:9353]	TRINITY_DN52683_c0_g2_i2	EAN76639	2.37e-82	tryparedoxin peroxidase
TRINITY_DN52778_c0_g1	105	627	5.977	1.46505e-38	106	633	5.952	4.62026e-71	B	TRINITY_DN52778_c0_g1_i1	KWU44129.1	4.36e-73	60s ribosomal protein l34-b [Rhodotorula sp. JG-1b]	TRINITY_DN52778_c0_g1_i1	P40525.1	1.07e-45	RecName: Full=60S ribosomal protein L34-B; AltName: Full=Large ribosomal subunit protein eL34-B	TRINITY_DN52778_c0_g1_i1	AT1G69620.1	1.55e-34	60S ribosomal protein L34-2 [Source:UniProtKB/Swiss-Prot;Acc:Q9FE65]	TRINITY_DN52778_c0_g1_i1	EDO99823	1.89e-25	Ribosomal protein L34 [Source:UniProtKB/TrEMBL;Acc:A8J8P4]					TRINITY_DN52778_c0_g1_i1	ENSP00000378163.2	4.17e-31	ribosomal protein L34 [Source:HGNC Symbol;Acc:HGNC:10340]	TRINITY_DN52778_c0_g1_i1	EAN78645	8.66e-14	60S ribosomal protein L34, putative
TRINITY_DN52814_c0_g2	24	163	6.756	4.18739e-17	24	164	6.699	4.43816e-30	B
TRINITY_DN52845_c0_g1	120	781	6.493	9.15415e-220	121	787	6.468	3.54419e-194	B	TRINITY_DN52845_c0_g1_i2	KWU47217.1	2.44e-87	ribosomal protein L24 [Rhodotorula sp. JG-1b]	TRINITY_DN52845_c0_g1_i2	Q9FJX2.1	4.39e-49	RecName: Full=60S ribosomal protein L26-2	TRINITY_DN52845_c0_g1_i2	AT5G67510.1	5.2e-50	60S ribosomal protein L26-2 [Source:UniProtKB/Swiss-Prot;Acc:Q9FJX2]	TRINITY_DN52845_c0_g1_i2	EDP09413	1.26e-45	Ribosomal protein L26 [Source:UniProtKB/TrEMBL;Acc:A8HMG7]					TRINITY_DN52845_c0_g1_i2	ENSP00000430673.1	7.68e-42	ribosomal protein L26 like 1 [Source:HGNC Symbol;Acc:HGNC:17050]	TRINITY_DN52845_c0_g1_i2	EAN77295	5.94e-47	60S ribosomal protein L26, putative
TRINITY_DN52891_c0_g1	50	814	16.322	7.877e-27	50	821	16.246	8.35307e-51	B	TRINITY_DN52891_c0_g1_i3	WP_011065171.1	3.37e-12	hypothetical protein [Oceanobacillus iheyensis]	TRINITY_DN52891_c0_g1_i3	P08021.3	1.35e-14	RecName: Full=FMRF-amide neuropeptides; Contains: RecName: Full=FLRF-amide; Contains: RecName: Full=FMRF-amide; Flags: Precursor
TRINITY_DN52891_c0_g2	26	332	12.706	1.11083e-06	26	334	12.603	1.18351e-15	B
TRINITY_DN53015_c0_g1	3435	3728	1.085	0.00286312	3478	3761	1.081	0.0221332	B
TRINITY_DN53058_c0_g1	920	1081	1.175	0.0013938	932	1091	1.171	0.00362565	B	TRINITY_DN53058_c0_g1_i3	XP_643968.1	2.64e-36	enhancer of rudimentary family protein [Dictyostelium discoideum AX4]	TRINITY_DN53058_c0_g1_i3	Q86A92.1	9.32e-39	RecName: Full=Enhancer of rudimentary homolog	TRINITY_DN53058_c0_g1_i3	AT5G10810.1	3.2e-36	Enhancer of rudimentary homolog [Source:UniProtKB/Swiss-Prot;Acc:Q96319]									TRINITY_DN53058_c0_g1_i3	ENSP00000451080.1	2.83e-38	enhancer of rudimentary homolog (Drosophila) [Source:HGNC Symbol;Acc:HGNC:3447]
TRINITY_DN53166_c0_g1	18	137	7.448	6.87104e-47	18	138	7.386	3.77538e-52	B	TRINITY_DN53166_c0_g1_i1	KWU46352.1	0	ATP synthase subunit beta [Rhodotorula sp. JG-1b]	TRINITY_DN53166_c0_g1_i1	P22068.1	0	RecName: Full=ATP synthase subunit beta, mitochondrial; Flags: Precursor	TRINITY_DN53166_c0_g1_i1	AT5G08680.1	0	ATP synthase subunit beta-3, mitochondrial [Source:UniProtKB/Swiss-Prot;Acc:Q9C5A9]	TRINITY_DN53166_c0_g1_i1	EDP04740	0	ATP synthase subunit beta [Source:UniProtKB/TrEMBL;Acc:A8IQU3]	TRINITY_DN53166_c0_g1_i1	BAA18087	0	ATP synthase b subunit	TRINITY_DN53166_c0_g1_i1	ENSP00000262030.3	0	ATP synthase, H+ transporting, mitochondrial F1 complex, beta polypeptide [Source:HGNC Symbol;Acc:HGNC:830]	TRINITY_DN53166_c0_g1_i1	AAZ10173	0	ATP synthase beta chain, mitochondrial precursor	Increased ATPase to cope with ion gradient and flux of Hg+ in the periplasm
TRINITY_DN53224_c0_g1	1297	1470	1.133	0.000247833	1312	1483	1.129	0.00109063	B	TRINITY_DN53224_c0_g1_i1	CUG85692.1	9e-91	calcineurin B subunit, putative [Bodo saltans]	TRINITY_DN53224_c0_g1_i1	P42322.1	7.79e-67	RecName: Full=Calcineurin subunit B; AltName: Full=Calcineurin regulatory subunit; AltName: Full=Protein phosphatase 2B regulatory subunit	TRINITY_DN53224_c0_g1_i1	AT3G18430.2	1.62e-24	Calcineurin b subunit (Protein phosphatase 2b regulatory subunit)-like protein [Source:UniProtKB/TrEMBL;Acc:Q9LS47]	TRINITY_DN53224_c0_g1_i1	EDP01056	3.03e-30	Predicted protein [Source:UniProtKB/TrEMBL;Acc:A8J3W4]					TRINITY_DN53224_c0_g1_i1	ENSP00000234310.3	2.01e-56	protein phosphatase 3 regulatory subunit B, alpha [Source:HGNC Symbol;Acc:HGNC:9317]	TRINITY_DN53224_c0_g1_i1	EAN77469	4.78e-54	calcineurin B subunit, putative
TRINITY_DN53264_c0_g1	9151	9826	1.074	0.0210679	9264	9913	1.07	0.0495012	B	TRINITY_DN53264_c0_g1_i1	NP_849729.1	6.26e-53	Ribosomal protein L18ae/LX family protein [Arabidopsis thaliana]	TRINITY_DN53264_c0_g1_i1	Q8L7K0.1	2.21e-55	RecName: Full=60S ribosomal protein L18a-1	TRINITY_DN53264_c0_g1_i1	AT1G29965.1	2.62e-56	60S ribosomal protein L18a-1 [Source:UniProtKB/Swiss-Prot;Acc:Q8L7K0]	TRINITY_DN53264_c0_g1_i1	EDP09481	7.38e-45	60S ribosomal protein L18a [Source:UniProtKB/TrEMBL;Acc:A8HN50]					TRINITY_DN53264_c0_g1_i1	ENSP00000222247.4	1.75e-47	ribosomal protein L18a [Source:HGNC Symbol;Acc:HGNC:10311]	TRINITY_DN53264_c0_g1_i1	EAN77804	2.93e-41	60S ribosomal protein L18a, putative
TRINITY_DN53287_c0_g1	13759	14989	1.089	0.00230789	13929	15122	1.086	0.0105407	B	TRINITY_DN53287_c0_g1_i1	ABW90362.1	1.86e-54	putative ribosomal protein L30 [Sipunculus nudus]	TRINITY_DN53287_c0_g1_i1	P67883.2	8.25e-54	RecName: Full=60S ribosomal protein L30	TRINITY_DN53287_c0_g1_i1	AT1G77940.1	1.48e-50	60S ribosomal protein L30-2 [Source:UniProtKB/Swiss-Prot;Acc:Q8VZ19]	TRINITY_DN53287_c0_g1_i1	EDP06387	1.48e-51	Ribosomal protein L30 [Source:UniProtKB/TrEMBL;Acc:A8ICT1]					TRINITY_DN53287_c0_g1_i1	ENSP00000287038.3	2.43e-54	ribosomal protein L30 [Source:HGNC Symbol;Acc:HGNC:10333]	TRINITY_DN53287_c0_g1_i1	EAN77832	3.3e-47	60S ribosomal protein L30
TRINITY_DN53324_c0_g1	149	1167	7.823	7.40444e-65	151	1178	7.791	2.22463e-112	B	TRINITY_DN53324_c0_g1_i2	KWU46898.1	6.26e-66	hypothetical protein RHOSPDRAFT_31720 [Rhodotorula sp. JG-1b]	TRINITY_DN53324_c0_g1_i2	Q01321.1	4.85e-09	RecName: Full=Cytochrome c oxidase subunit NDUFA4; AltName: Full=Complex I-MLRQ; Short=CI-MLRQ; AltName: Full=NADH-ubiquinone oxidoreductase MLRQ subunit													TRINITY_DN53324_c0_g1_i2	ENSP00000339720.5	6.58e-09	NDUFA4, mitochondrial complex associated [Source:HGNC Symbol;Acc:HGNC:7687]
TRINITY_DN53439_c0_g1	50	346	6.942	3.11432e-99	50	350	6.907	1.31029e-104	B	TRINITY_DN53439_c0_g1_i1	KWU43558.1	1.93e-82	hypothetical protein RHOSPDRAFT_19409 [Rhodotorula sp. JG-1b]	TRINITY_DN53439_c0_g1_i1	O13614.1	8.64e-39	RecName: Full=40S ribosomal protein S10-B	TRINITY_DN53439_c0_g1_i1	AT5G41520.1	6.11e-27	40S ribosomal protein S10-2 [Source:UniProtKB/Swiss-Prot;Acc:Q9FFS8]	TRINITY_DN53439_c0_g1_i1	EDP00807	2.58e-32	Ribosomal protein S10 [Source:UniProtKB/TrEMBL;Acc:A8J4Q3]					TRINITY_DN53439_c0_g1_i1	ENSP00000481646.1	6.4e-32	ribosomal protein S10 [Source:HGNC Symbol;Acc:HGNC:10383]	TRINITY_DN53439_c0_g1_i1	EAN77954	3.84e-14	40S ribosomal protein S10, putative
TRINITY_DN53444_c0_g1	3672	3954	1.077	0.00750002	3718	3989	1.073	0.0459505	B	TRINITY_DN53444_c0_g1_i1	GAW80667.1	4.4e-07	hypothetical protein PGO_082330 [Plasmodium gonderi]
TRINITY_DN53481_c0_g3	72	438	6.037	2.74179e-122	73	442	6.011	2.31787e-130	B	TRINITY_DN53481_c0_g3_i1	KWU42406.1	7.75e-69	ribosomal protein S14, partial [Rhodotorula sp. JG-1b]	TRINITY_DN53481_c0_g3_i1	Q08699.1	5.08e-65	RecName: Full=40S ribosomal protein S14	TRINITY_DN53481_c0_g3_i1	AT3G11510.1	1.67e-63	At3g11510 [Source:UniProtKB/TrEMBL;Acc:Q1H555]	TRINITY_DN53481_c0_g3_i1	EDP00328	4.42e-66	40S ribosomal protein S14 [Source:UniProtKB/Swiss-Prot;Acc:P46295]	TRINITY_DN53481_c0_g3_i1	BAA17326	3.5e-08	30S ribosomal protein S11	TRINITY_DN53481_c0_g3_i1	ENSP00000385425.1	8.1e-64	ribosomal protein S14 [Source:HGNC Symbol;Acc:HGNC:10387]	TRINITY_DN53481_c0_g3_i1	AAZ12056	4.38e-49	40S ribosomal protein S14
TRINITY_DN53516_c0_g1	82	480	5.83	7.34385e-42	83	484	5.801	1.88721e-76	B	TRINITY_DN53516_c0_g1_i2	KWU45741.1	1.27e-141	60S ribosomal protein L10A [Rhodotorula sp. JG-1b]	TRINITY_DN53516_c0_g1_i2	Q7RZS0.1	2.1e-102	RecName: Full=60S ribosomal protein L10a; AltName: Full=Cytoplasmic ribosomal protein 74	TRINITY_DN53516_c0_g1_i2	AT1G08360.1	2.36e-89	60S ribosomal protein L10a-1 [Source:UniProtKB/Swiss-Prot;Acc:Q8VZB9]	TRINITY_DN53516_c0_g1_i2	EDP07503	2.76e-77	Ribosomal protein [Source:UniProtKB/TrEMBL;Acc:A8I4T2]					TRINITY_DN53516_c0_g1_i2	ENSP00000363018.3	7.55e-85	ribosomal protein L10a [Source:HGNC Symbol;Acc:HGNC:10299]	TRINITY_DN53516_c0_g1_i2	EAN78722	8.68e-73	60S ribosomal protein L10a
TRINITY_DN53806_c0_g1	80	466	5.801	3.20614e-38	81	470	5.772	5.6037e-69	B	TRINITY_DN53806_c0_g1_i3	KWU45247.1	1.85e-103	hypothetical protein RHOSPDRAFT_28875 [Rhodotorula sp. JG-1b]	TRINITY_DN53806_c0_g1_i3	P78571.1	1.2e-81	RecName: Full=40S ribosomal protein S13	TRINITY_DN53806_c0_g1_i3	AT3G60770.1	3.22e-81	40S ribosomal protein S13-1 [Source:UniProtKB/Swiss-Prot;Acc:P59223]	TRINITY_DN53806_c0_g1_i3	EDP05683	3.45e-75	Ribosomal protein S13 [Source:UniProtKB/TrEMBL;Acc:A8IGY1]					TRINITY_DN53806_c0_g1_i3	ENSP00000435777.1	9.79e-82	ribosomal protein S13 [Source:HGNC Symbol;Acc:HGNC:10386]	TRINITY_DN53806_c0_g1_i3	AAQ16048	5.63e-73	40S ribosomal protein S13, putative
TRINITY_DN53818_c0_g1	36	356	9.884	2.09527e-109	36	359	9.824	7.37185e-110	B	TRINITY_DN53818_c0_g1_i3	XP_016270380.1	1.69e-67	cytochrome c [Rhodotorula toruloides NP11]	TRINITY_DN53818_c0_g1_i6	P00047.1	1.18e-57	RecName: Full=Cytochrome c	TRINITY_DN53818_c0_g1_i6	AT1G22840.1	2.44e-46	CYTC-1 [Source:UniProtKB/TrEMBL;Acc:A0A178W284]	TRINITY_DN53818_c0_g1_i6	EDP00604	1.09e-43	Cytochrome c [Source:UniProtKB/Swiss-Prot;Acc:P15451]					TRINITY_DN53818_c0_g1_i6	ENSP00000387279.1	5.61e-42	cytochrome c, somatic [Source:HGNC Symbol;Acc:HGNC:19986]	TRINITY_DN53818_c0_g1_i6	AAZ13276	2.25e-38	cytochrome c	Cytochrome C upregulation largely caused by mitochriondrial oxidative stress
TRINITY_DN53868_c0_g1	3164	4186	1.322	3.07149e-37	3204	4223	1.318	9.53484e-28	B	TRINITY_DN53868_c0_g1_i2	XP_006827315.2	1.02e-30	protein translation factor SUI1 homolog 2 [Amborella trichopoda]	TRINITY_DN53868_c0_g1_i2	Q94JV4.1	1.3e-31	RecName: Full=Protein translation factor SUI1 homolog 2	TRINITY_DN53868_c0_g1_i2	AT1G54290.1	1.54e-32	Protein translation factor SUI1 homolog 2 [Source:UniProtKB/Swiss-Prot;Acc:Q94JV4]	TRINITY_DN53868_c0_g1_i2	EDP05192	1.07e-31	Translation initiation protein [Source:UniProtKB/TrEMBL;Acc:A8IP53]					TRINITY_DN53868_c0_g1_i2	ENSP00000232905.3	3.45e-26	eukaryotic translation initiation factor 1B [Source:HGNC Symbol;Acc:HGNC:30792]	TRINITY_DN53868_c0_g1_i2	EAN79547	1.34e-17	protein translation factor SUI1 homolog, putative
TRINITY_DN54067_c1_g1	114	74	-1.5625	0.0165799	116	74	-1.56495	0.0185981	B
TRINITY_DN54384_c0_g1	104	70	-1.47275	0.0139482	105	71	-1.4771	0.00939044	B
TRINITY_DN54408_c0_g2	20	116	5.603	6.88809e-34	21	117	5.56	5.82652e-37	B	TRINITY_DN54408_c0_g2_i1	KWU47518.1	0	elongation factor 2 [Rhodotorula sp. JG-1b]	TRINITY_DN54408_c0_g2_i1	Q6FYA7.1	0	RecName: Full=Elongation factor 2; Short=EF-2	TRINITY_DN54408_c0_g2_i1	AT1G56070.1	0	Elongation factor 2 [Source:UniProtKB/Swiss-Prot;Acc:Q9ASR1]	TRINITY_DN54408_c0_g2_i1	EDO96511	0	Elongation factor 2 [Source:UniProtKB/TrEMBL;Acc:A8JHX9]	TRINITY_DN54408_c0_g2_i2	BAA18322	3.99e-42	elongation factor EF-G	TRINITY_DN54408_c0_g2_i1	ENSP00000307940.5	0	eukaryotic translation elongation factor 2 [Source:HGNC Symbol;Acc:HGNC:3214]	TRINITY_DN54408_c0_g2_i1	EAN77875	0	elongation factor 2
TRINITY_DN54457_c0_g1	4528	5079	1.122	6.09942e-07	4584	5124	1.118	6.62755e-05	B	TRINITY_DN54457_c0_g1_i2	ODV89535.1	3.47e-108	hypothetical protein CANCADRAFT_4151 [Tortispora caseinolytica NRRL Y-17796]	TRINITY_DN54457_c0_g1_i2	P42643.3	2.42e-105	RecName: Full=14-3-3-like protein GF14 chi; AltName: Full=General regulatory factor 1	TRINITY_DN54457_c0_g1_i2	AT4G09000.1	2.87e-106	14-3-3-like protein GF14 chi [Source:UniProtKB/TrEMBL;Acc:F4JJ94]	TRINITY_DN54457_c0_g1_i1	EDO96857	4.69e-101	14-3-3 protein [Source:UniProtKB/TrEMBL;Acc:A8JGV6]					TRINITY_DN54457_c0_g1_i2	ENSP00000487356.1	2.7e-103	tyrosine 3-monooxygenase/tryptophan 5-monooxygenase activation protein epsilon [Source:HGNC Symbol;Acc:HGNC:12851]	TRINITY_DN54457_c0_g1_i2	EAN79905	1.09e-94	14-3-3-like protein, putative
TRINITY_DN54584_c0_g1	9851	10635	1.079	0.00431073	9972	10729	1.076	0.0182901	B	TRINITY_DN54584_c0_g1_i3	XP_002978735.1	9.43e-76	hypothetical protein SELMODRAFT_109549 [Selaginella moellendorffii]	TRINITY_DN54584_c0_g1_i3	Q58DT1.1	3.05e-76	RecName: Full=60S ribosomal protein L7	TRINITY_DN54584_c0_g1_i3	AT2G44120.1	4.35e-74	60S ribosomal protein L7-3 [Source:UniProtKB/TrEMBL;Acc:F4IT48]	TRINITY_DN54584_c0_g1_i3	EDP03542	3.72e-67	Ribosomal protein L7 [Source:UniProtKB/TrEMBL;Acc:A8IVE2]					TRINITY_DN54584_c0_g1_i3	ENSP00000379729.1	5.44e-77	ribosomal protein L7 [Source:HGNC Symbol;Acc:HGNC:10363]	TRINITY_DN54584_c0_g1_i3	AAZ12238	5.89e-64	60S ribosomal protein L7, putative
TRINITY_DN54655_c1_g1	1751	2398	1.369	1.09005e-21	1773	2419	1.364	1.82053e-16	B	TRINITY_DN54655_c1_g1_i1	ABD46572.1	1.68e-55	phosphate transporter, partial [Euglena gracilis]	TRINITY_DN54655_c1_g1_i1	Q8H074.1	3.79e-32	RecName: Full=Probable inorganic phosphate transporter 1-12; Short=OsPT12; Short=OsPht1;12; AltName: Full=H(+)/Pi cotransporter	TRINITY_DN54655_c1_g1_i1	AT5G43360.1	7.16e-32	Probable inorganic phosphate transporter 1-3 [Source:UniProtKB/Swiss-Prot;Acc:O48639]	TRINITY_DN54655_c1_g1_i1	EDP04438	8.33e-12	Proton/phosphate symporter, splice variant b [Source:UniProtKB/TrEMBL;Acc:A8ISD6]
TRINITY_DN54728_c0_g1	2444	2819	1.154	3.91986e-07	2474	2844	1.149	1.38791e-05	B	TRINITY_DN54728_c0_g1_i1	XP_011399690.1	4.21e-49	Ubiquitin-conjugating enzyme E2 variant 1C [Auxenochlorella protothecoides]	TRINITY_DN54728_c0_g1_i1	Q9SJ44.1	1.32e-42	RecName: Full=Ubiquitin-conjugating enzyme E2 variant 1C; Short=Ubc enzyme variant 1C; AltName: Full=Protein MMS ZWEI HOMOLOG 3	TRINITY_DN54728_c0_g1_i1	AT2G36060.3	2.6e-44	UEV1C [Source:UniProtKB/TrEMBL;Acc:A0A178VRN9]	TRINITY_DN54728_c0_g1_i1	EDP07019	2.49e-44	Ubiquitin-conjugating enzyme E2 [Source:UniProtKB/TrEMBL;Acc:Q8VZX3]					TRINITY_DN54728_c0_g1_i1	ENSP00000360742.3	6.97e-39	ubiquitin conjugating enzyme E2 V1 [Source:HGNC Symbol;Acc:HGNC:12494]	TRINITY_DN54728_c0_g1_i1	EAN79301	3.3e-47	ubiquitin-conjugating enzyme, putative
TRINITY_DN55026_c0_g1	22	121	5.344	2.51935e-27	22	122	5.312	7.69042e-26	B	TRINITY_DN55026_c0_g1_i1	KWU46249.1	2.62e-103	ubiquitin-conjugating enzyme E2 [Rhodotorula sp. JG-1b]	TRINITY_DN55026_c0_g1_i1	Q9UVR2.2	2.6e-96	RecName: Full=Ubiquitin-conjugating enzyme E2-16 kDa; AltName: Full=E2 ubiquitin-conjugating enzyme 1; AltName: Full=Ubiquitin carrier protein; AltName: Full=Ubiquitin-protein ligase	TRINITY_DN55026_c0_g1_i1	AT1G64230.1	6.31e-90	Ubiquitin-conjugating enzyme E2 28 [Source:UniProtKB/TrEMBL;Acc:F4I5B8]	TRINITY_DN55026_c0_g1_i1	EDO98738	8.8e-93	Ubiquitin conjugating enzyme [Source:UniProtKB/TrEMBL;Acc:A8JBJ3]					TRINITY_DN55026_c0_g1_i1	ENSP00000345285.5	2.67e-91	ubiquitin conjugating enzyme E2 D3 [Source:HGNC Symbol;Acc:HGNC:12476]	TRINITY_DN55026_c0_g1_i1	AAZ11215	2.49e-80	ubiquitin-conjugating enzyme E2, putative
TRINITY_DN55083_c0_g1	2421	2923	1.207	5.15016e-14	2451	2949	1.203	1.0056e-10	B	TRINITY_DN55083_c0_g1_i3	XP_013756858.1	3.12e-10	hypothetical protein AMSG_06792 [Thecamonas trahens ATCC 50062]	TRINITY_DN55083_c0_g1_i3	Q9XV46.1	2.18e-10	RecName: Full=CCCH-type zinc finger protein moe-3; AltName: Full=Maturation oocyte expansion protein 3	TRINITY_DN55083_c0_g1_i3	AT1G68200.2	7.73e-06	Zinc finger CCCH domain-containing protein 15 [Source:UniProtKB/Swiss-Prot;Acc:Q9C9F5]													TRINITY_DN55083_c0_g1_i3	AAZ11273	4.53e-08	hypothetical protein, conserved
TRINITY_DN55150_c0_g2	93	592	6.367	3.63324e-162	94	596	6.341	4.10351e-156	B	TRINITY_DN55150_c0_g2_i3	KWU45413.1	5.8e-128	ribosomal protein L5 [Rhodotorula sp. JG-1b]	TRINITY_DN55150_c0_g2_i1	P0CT77.1	1.05e-97	RecName: Full=60S ribosomal protein L11-A	TRINITY_DN55150_c0_g2_i1	AT5G45775.2	6.9e-88	60S ribosomal protein L11-2 [Source:UniProtKB/Swiss-Prot;Acc:P42794]	TRINITY_DN55150_c0_g2_i1	EDP09751	1.02e-69	Ribosomal protein L11 [Source:UniProtKB/TrEMBL;Acc:A8HQ81]	TRINITY_DN55150_c0_g2_i1	BAA17337	4.75e-08	50S ribosomal protein L5	TRINITY_DN55150_c0_g2_i3	ENSP00000363676.3	8.97e-89	ribosomal protein L11 [Source:HGNC Symbol;Acc:HGNC:10301]	TRINITY_DN55150_c0_g2_i1	EAN76781	2.88e-85	60S ribosomal protein L11, putative
TRINITY_DN55336_c0_g1	192	237	1.234	0.0251335	194	240	1.229	0.00940151	B
TRINITY_DN55378_c0_g1	26	170	6.566	2.55858e-53	26	171	6.518	1.66284e-59	B	TRINITY_DN55378_c0_g1_i4	KWU46270.1	2.72e-59	histone H2A [Rhodotorula sp. JG-1b]	TRINITY_DN55378_c0_g1_i1	Q6BKW8.3	6.12e-53	RecName: Full=Histone H2A.1	TRINITY_DN55378_c0_g1_i3	AT1G08880.1	5.97e-43	Histone H2A [Source:UniProtKB/TrEMBL;Acc:A0A178W8H7]	TRINITY_DN55378_c0_g1_i1	EDP08438	4.31e-44	Histone H2A [Source:UniProtKB/TrEMBL;Acc:Q42680]					TRINITY_DN55378_c0_g1_i1	ENSP00000332194.2	3.84e-45	histone cluster 2, H2ac [Source:HGNC Symbol;Acc:HGNC:4738]	TRINITY_DN55378_c0_g1_i4	AAZ12357	1.08e-20	histone H2A, putative
TRINITY_DN55649_c1_g1	11852	12801	1.08	0.000326306	12000	12914	1.076	0.00545133	B	TRINITY_DN55649_c1_g1_i3	XP_021877702.1	5.42e-86	60S ribosomal protein L12 [Lobosporangium transversale]	TRINITY_DN55649_c1_g1_i3	P23358.1	3.81e-83	RecName: Full=60S ribosomal protein L12	TRINITY_DN55649_c1_g1_i3	AT5G60670.1	6.66e-77	60S ribosomal protein L12-3 [Source:UniProtKB/Swiss-Prot;Acc:Q9FF52]	TRINITY_DN55649_c1_g1_i1	EDP00664	1.55e-71	Ribosomal protein L12 [Source:UniProtKB/TrEMBL;Acc:A8J597]					TRINITY_DN55649_c1_g1_i3	ENSP00000354739.5	1.74e-83	ribosomal protein L12 [Source:HGNC Symbol;Acc:HGNC:10302]	TRINITY_DN55649_c1_g1_i3	AAZ13367	2.9e-67	60S ribosomal protein L12, putative
TRINITY_DN55805_c0_g1	131	693	5.305	1.51589e-163	132	699	5.282	2.55537e-138	B	TRINITY_DN55805_c0_g1_i2	CEF85879.1	7.2e-59	unnamed protein product [Fusarium graminearum]	TRINITY_DN55805_c0_g1_i6	P23750.2	1.05e-50	RecName: Full=Histone H4.1	TRINITY_DN55805_c0_g1_i3	AT5G59970.2	4.37e-48	Histone H4 [Source:UniProtKB/TrEMBL;Acc:A0A178VF54]	TRINITY_DN55805_c0_g1_i3	EDP08465	2.03e-47	Histone H4 [Source:UniProtKB/TrEMBL;Acc:A8HVA3]					TRINITY_DN55805_c0_g1_i3	ENSP00000481486.1	3.93e-48	histone cluster 1, H4i [Source:HGNC Symbol;Acc:HGNC:4793]	TRINITY_DN55805_c0_g1_i6	AAZ11532	2.16e-33	histone H4, putative
TRINITY_DN56068_c0_g3	749	3662	4.887	1.66089e-64	758	3695	4.871	2.00753e-112	B	TRINITY_DN56068_c0_g3_i3	KWU44806.1	2.15e-87	ubiquitin-domain-containing protein [Rhodotorula sp. JG-1b]	TRINITY_DN56068_c0_g3_i2	P0CG83.1	1.71e-77	RecName: Full=Polyubiquitin; Contains: RecName: Full=Ubiquitin; Flags: Precursor	TRINITY_DN56068_c0_g3_i2	AT4G05050.4	1.69e-78	Polyubiquitin [Source:UniProtKB/TrEMBL;Acc:Q8H0Y0]	TRINITY_DN56068_c0_g3_i2	EDO97495	7.09e-78	Bi-ubiquitin, major isoform [Source:UniProtKB/TrEMBL;Acc:A8JF17]					TRINITY_DN56068_c0_g3_i2	ENSP00000441238.1	7.42e-76	ubiquitin C [Source:HGNC Symbol;Acc:HGNC:12468]	TRINITY_DN56068_c0_g3_i2	EAN79944	8.16e-70	polyubiquitin, putative
TRINITY_DN56179_c0_g1	272	322	1.182	0.0448936	276	325	1.178	0.0220126	B	TRINITY_DN56179_c0_g1_i3	XP_001774143.1	1.7e-10	predicted protein [Physcomitrella patens]					TRINITY_DN56179_c0_g1_i3	AT5G57860.1	2.31e-08	At5g57860 [Source:UniProtKB/TrEMBL;Acc:Q8L8S0]	TRINITY_DN56179_c0_g1_i3	EDP03093	7.27e-11	Ubiquitin-like superfamily protein [Source:Projected from Arabidopsis thaliana (AT5G57860) TAIR;Acc:AT5G57860]					TRINITY_DN56179_c0_g1_i4	ENSP00000471464.1	4.48e-06	ubiquitin A-52 residue ribosomal protein fusion product 1 [Source:HGNC Symbol;Acc:HGNC:12458]
TRINITY_DN56180_c0_g1	288	221	-1.30378	0.0128549	292	223	-1.3089	0.0107971	B
TRINITY_DN56246_c0_g1	1081	1200	1.11	0.020912	1094	1211	1.106	0.0314706	B	TRINITY_DN56246_c0_g1_i2	CUG10477.1	3.11e-107	aminotransferase, putative [Bodo saltans]	TRINITY_DN56246_c0_g1_i2	Q9VU95.2	6.14e-69	RecName: Full=Alanine--glyoxylate aminotransferase 2-like	TRINITY_DN56246_c0_g1_i2	AT3G08860.2	1.07e-67	Alanine--glyoxylate aminotransferase 2 homolog 3, mitochondrial [Source:UniProtKB/Swiss-Prot;Acc:Q9SR86]	TRINITY_DN56246_c0_g1_i2	EDO96807	2.71e-66	Alanine-glyoxylate transaminase [Source:UniProtKB/TrEMBL;Acc:A8JH72]	TRINITY_DN56246_c0_g1_i2	BAA10185	2.86e-15	glutamate-1-semialdehyde 2,1-aminomutase	TRINITY_DN56246_c0_g1_i2	ENSP00000310978.5	1.5e-68	5-phosphohydroxy-L-lysine phospho-lyase [Source:HGNC Symbol;Acc:HGNC:28249]
TRINITY_DN56296_c1_g1	315	235	-1.34228	0.00427382	319	237	-1.34771	0.00520363	B
TRINITY_DN56299_c0_g1	7726	8262	1.069	0.00438613	7822	8336	1.066	0.0322381	B	TRINITY_DN56299_c0_g1_i2	XP_005703122.1	6.74e-71	60S ribosomal protein L15e isoform 2 [Galdieria sulphuraria]	TRINITY_DN56299_c0_g1_i2	O82528.1	1.18e-67	RecName: Full=60S ribosomal protein L15	TRINITY_DN56299_c0_g1_i2	AT4G17390.1	8.77e-65	60S ribosomal protein L15-2 [Source:UniProtKB/Swiss-Prot;Acc:Q8VYF1]	TRINITY_DN56299_c0_g1_i2	EDP06755	2.7e-68	Ribosomal protein L15 [Source:UniProtKB/TrEMBL;Acc:A8I982]					TRINITY_DN56299_c0_g1_i2	ENSP00000483260.1	8.37e-65	ribosomal protein L15 [Source:HGNC Symbol;Acc:HGNC:10306]	TRINITY_DN56299_c0_g1_i2	AAZ12062	5.51e-60	ribosomal protein L15, putative
TRINITY_DN56352_c0_g2	24825	27413	1.104	0.000775448	25129	27658	1.101	0.00223369	B																									TRINITY_DN56352_c0_g2_i2	EAN79491	2.65e-07	ATPase subunit 9, putative
TRINITY_DN56490_c0_g1	174	224	1.287	0.0157989	176	226	1.283	0.0090302	B	TRINITY_DN56490_c0_g1_i3	XP_004363455.1	2.27e-69	AP-3 complex subunit sigma-1 [Capsaspora owczarzaki ATCC 30864]	TRINITY_DN56490_c0_g1_i1	P59780.1	5.96e-70	RecName: Full=AP-3 complex subunit sigma-2; AltName: Full=AP-3 complex subunit sigma-3B; AltName: Full=Adaptor-related protein complex 3 subunit sigma-2; AltName: Full=Sigma-3B-adaptin; Short=Sigma3B-adaptin; AltName: Full=Sigma-adaptin 3b	TRINITY_DN56490_c0_g1_i1	AT3G50860.2	4.26e-55	AP-3 complex subunit sigma [Source:UniProtKB/Swiss-Prot;Acc:Q8VZ37]	TRINITY_DN56490_c0_g1_i1	EDP05692	5.45e-32	Sigma4-Adaptin [Source:UniProtKB/TrEMBL;Acc:A8IH35]					TRINITY_DN56490_c0_g1_i1	ENSP00000338777.4	1.3e-70	adaptor related protein complex 3 sigma 2 subunit [Source:HGNC Symbol;Acc:HGNC:571]	TRINITY_DN56490_c0_g1_i3	AAZ13432	9.29e-60	clathrin assembly sigma-adaptin protein 3, putative
TRINITY_DN56600_c0_g1	8759	9442	1.078	0.0109995	8867	9526	1.074	0.035812	B	TRINITY_DN56600_c0_g1_i1	ORX90006.1	4.24e-80	60S ribosomal protein L11 [Basidiobolus meristosporus CBS 931.73]	TRINITY_DN56600_c0_g1_i1	P42922.1	2.92e-80	RecName: Full=60S ribosomal protein L11	TRINITY_DN56600_c0_g1_i1	AT2G42740.1	1.13e-76	60S ribosomal protein L11-1 [Source:UniProtKB/Swiss-Prot;Acc:P42795]	TRINITY_DN56600_c0_g1_i1	EDP09751	2.04e-64	Ribosomal protein L11 [Source:UniProtKB/TrEMBL;Acc:A8HQ81]					TRINITY_DN56600_c0_g1_i1	ENSP00000363676.3	4.25e-80	ribosomal protein L11 [Source:HGNC Symbol;Acc:HGNC:10301]	TRINITY_DN56600_c0_g1_i1	EAN76781	6.14e-80	60S ribosomal protein L11, putative
TRINITY_DN56686_c0_g1	11484	12526	1.091	0.0020588	11626	12637	1.087	0.0112935	B	TRINITY_DN56686_c0_g1_i4	XP_001636645.1	1.31e-57	predicted protein [Nematostella vectensis]	TRINITY_DN56686_c0_g1_i4	O02414.1	4.69e-58	RecName: Full=Dynein light chain LC6, flagellar outer arm	TRINITY_DN56686_c0_g1_i4	AT4G15930.1	2.4e-42	At4g15930 [Source:UniProtKB/TrEMBL;Acc:Q84VW0]	TRINITY_DN56686_c0_g1_i4	EDO96760	1.54e-55	Outer dynein arm light chain 8 [Source:UniProtKB/TrEMBL;Acc:A8JH45]					TRINITY_DN56686_c0_g1_i4	ENSP00000477310.1	1.21e-58	dynein light chain LC8-type 2 [Source:HGNC Symbol;Acc:HGNC:24596]	TRINITY_DN56686_c0_g1_i4	EAN79052	8.38e-53	dynein light chain, putative
TRINITY_DN56742_c0_g1	1056	1174	1.112	0.0105914	1069	1184	1.108	0.0269805	B	TRINITY_DN56742_c0_g1_i2	EJK65565.1	2.68e-08	hypothetical protein THAOC_13560 [Thalassiosira oceanica]																					TRINITY_DN56742_c0_g1_i1	CAJ16065	4.07e-07	hypothetical protein, conserved
TRINITY_DN56752_c0_g1	368	429	1.164	0.0465252	372	433	1.16	0.0365581	B	TRINITY_DN56752_c0_g1_i3	CUG77071.1	3.99e-26	prefoldin-like protein, putative [Bodo saltans]	TRINITY_DN56752_c0_g1_i3	Q9M4B5.3	2.79e-14	RecName: Full=Probable prefoldin subunit 4; AltName: Full=ABI3-interacting protein 3	TRINITY_DN56752_c0_g1_i3	AT1G08780.1	3.3e-15	Probable prefoldin subunit 4 [Source:UniProtKB/Swiss-Prot;Acc:Q9M4B5]	TRINITY_DN56752_c0_g1_i3	EDP01136	9.65e-12	ABI3-interacting protein 3 [Source:Projected from Arabidopsis thaliana (AT1G08780) TAIR;Acc:AT1G08780]					TRINITY_DN56752_c0_g1_i1	ENSP00000360473.2	1.6e-14	prefoldin subunit 4 [Source:HGNC Symbol;Acc:HGNC:8868]	TRINITY_DN56752_c0_g1_i3	EAN79061	1.45e-17	hypothetical protein, conserved
TRINITY_DN5677_c0_g1	118	847	7.157	3.13607e-100	120	854	7.124	1.43415e-148	B	TRINITY_DN5677_c0_g1_i1	KWU44345.1	4.61e-114	40S ribosomal protein S9 [Rhodotorula sp. JG-1b]	TRINITY_DN5677_c0_g1_i1	Q09757.2	1.29e-101	RecName: Full=40S ribosomal protein S9-A	TRINITY_DN5677_c0_g1_i1	AT5G15200.1	8.36e-85	40S ribosomal protein S9-1 [Source:UniProtKB/Swiss-Prot;Acc:Q9LXG1]	TRINITY_DN5677_c0_g1_i1	EDO97033	3.92e-88	Ribosomal protein S9, component of cytosolic 80S ribosome and 40S small subunit [Source:UniProtKB/TrEMBL;Acc:A8JGF8]					TRINITY_DN5677_c0_g1_i1	ENSP00000482475.1	9.64e-90	ribosomal protein S9 [Source:HGNC Symbol;Acc:HGNC:10442]	TRINITY_DN5677_c0_g1_i1	AAZ12882	9.49e-64	40S ribosomal protein S9, putative
TRINITY_DN56785_c1_g1	305	230	-1.32626	2.31059e-05	309	232	-1.33156	7.72171e-07	B	TRINITY_DN56785_c1_g1_i1	XP_013096935.1	1.04e-27	PREDICTED: mesocentin-like [Biomphalaria glabrata]
TRINITY_DN56816_c0_g1	10107	10876	1.076	0.00783497	10232	10972	1.072	0.0266874	B	TRINITY_DN56816_c0_g1_i8	KIM92298.1	5.29e-46	hypothetical protein PILCRDRAFT_810341 [Piloderma croceum F 1598]	TRINITY_DN56816_c0_g1_i8	Q7ZUB2.3	4e-45	RecName: Full=40S ribosomal protein S17	TRINITY_DN56816_c0_g1_i8	AT3G10610.1	8.25e-44	40S ribosomal protein S17-3 [Source:UniProtKB/Swiss-Prot;Acc:Q9SQZ1]	TRINITY_DN56816_c0_g1_i8	EDO96968	4.7e-47	Ribosomal protein S17 [Source:UniProtKB/TrEMBL;Acc:A8JGK1]					TRINITY_DN56816_c0_g1_i8	ENSP00000453910.1	9.21e-46	ribosomal protein S17 [Source:HGNC Symbol;Acc:HGNC:10397]	TRINITY_DN56816_c0_g1_i8	EAN80133	7.71e-47	40S ribosomal protein S17, putative
TRINITY_DN57094_c0_g1	123	90	-1.37552	0.00956132	125	90	-1.37931	0.00168226	B
TRINITY_DN57144_c0_g1	1749	1984	1.134	0.000329741	1770	2001	1.13	0.00207134	B	TRINITY_DN57144_c0_g1_i1	XP_012531456.1	9.86e-08	PREDICTED: NADH dehydrogenase [ubiquinone] 1 beta subcomplex subunit 7 [Monomorium pharaonis]					TRINITY_DN57144_c0_g1_i1	AT2G02050.1	2.63e-06	NADH dehydrogenase [ubiquinone] 1 beta subcomplex subunit 7 [Source:UniProtKB/Swiss-Prot;Acc:Q9SKC9]	TRINITY_DN57144_c0_g1_i1	EDO99667	4.29e-11	NADH:ubiquinone oxidoreductase 10 kDa subunit [Source:UniProtKB/TrEMBL;Acc:Q6UKY7]
TRINITY_DN57266_c0_g1	1680	1974	1.174	1.5338e-07	1701	1991	1.17	3.86158e-06	B	TRINITY_DN57266_c0_g1_i6	ORY87940.1	9.6e-40	nuclear transport factor 2 [Protomyces lactucaedebilis]	TRINITY_DN57266_c0_g1_i6	Q6FRC6.1	1.47e-39	RecName: Full=Nuclear transport factor 2; Short=NTF-2	TRINITY_DN57266_c0_g1_i2	AT1G27310.1	7.75e-39	NTF2A [Source:UniProtKB/TrEMBL;Acc:A0A178WBG2]	TRINITY_DN57266_c0_g1_i6	EDP07056	1.1e-36	Predicted protein [Source:UniProtKB/TrEMBL;Acc:A8I6D1]					TRINITY_DN57266_c0_g1_i2	ENSP00000457022.1	8.68e-30	nuclear transport factor 2 [Source:HGNC Symbol;Acc:HGNC:13722]	TRINITY_DN57266_c0_g1_i6	AAZ13193	8.78e-33	nuclear transport factor 2, putative
TRINITY_DN57277_c0_g1	1944	2198	1.13	0.00123513	1967	2218	1.127	0.00495928	B
TRINITY_DN57287_c0_g1	3288	3000	-1.09529	0.00101688	3329	3027	-1.10011	0.0038483	B	TRINITY_DN57287_c0_g1_i1	XP_013754039.1	1.19e-80	proline dehydrogenase 1 [Thecamonas trahens ATCC 50062]	TRINITY_DN57287_c0_g1_i1	O43272.3	1.6e-54	RecName: Full=Proline dehydrogenase 1, mitochondrial; AltName: Full=Proline oxidase; AltName: Full=Proline oxidase 2; AltName: Full=p53-induced gene 6 protein; Flags: Precursor	TRINITY_DN57287_c0_g1_i1	AT3G30775.2	6.69e-07	Proline dehydrogenase 1, mitochondrial [Source:UniProtKB/Swiss-Prot;Acc:P92983]	TRINITY_DN57287_c0_g1_i1	EDP09384	1.08e-29	Proline oxidase [Source:UniProtKB/TrEMBL;Acc:A8HM76]					TRINITY_DN57287_c0_g1_i1	ENSP00000480347.1	5.81e-55	proline dehydrogenase 1 [Source:HGNC Symbol;Acc:HGNC:9453]	TRINITY_DN57287_c0_g1_i1	AAZ12086	6.3e-54	proline oxidase, putative
TRINITY_DN57308_c0_g2	34	185	5.429	2.43554e-45	34	187	5.398	1.35441e-45	B	TRINITY_DN57308_c0_g2_i1	KWU43629.1	0	heat shock protein 70 [Rhodotorula sp. JG-1b]	TRINITY_DN57308_c0_g2_i1	Q876N3.3	0	RecName: Full=Ribosome-associated molecular chaperone SSB; AltName: Full=Heat shock protein SSB; AltName: Full=Hsp70 chaperone Ssb	TRINITY_DN57308_c0_g2_i1	AT1G16030.1	0	Hsp70b [Source:UniProtKB/TrEMBL;Acc:A0A178W9N7]	TRINITY_DN57308_c0_g2_i1	EDO97621	0	Heat shock protein 70A [Source:UniProtKB/TrEMBL;Acc:A8JEU4]	TRINITY_DN57308_c0_g2_i1	BAA10059	1.4e-142	DnaK protein	TRINITY_DN57308_c0_g2_i1	ENSP00000227378.3	0	heat shock protein family A (Hsp70) member 8 [Source:HGNC Symbol;Acc:HGNC:5241]	TRINITY_DN57308_c0_g2_i1	EAN80086	0	heat shock protein 70
TRINITY_DN57308_c0_g3	30	115	3.805	7.21165e-26	30	116	3.782	1.49286e-28	B	TRINITY_DN57308_c0_g3_i2	KWU46076.1	0	heat shock protein 70 [Rhodotorula sp. JG-1b]	TRINITY_DN57308_c0_g3_i2	Q5B0C0.1	0	RecName: Full=Heat shock 70 kDa protein; Flags: Precursor	TRINITY_DN57308_c0_g3_i2	AT5G09590.1	0	Heat shock 70 kDa protein 10, mitochondrial [Source:UniProtKB/Swiss-Prot;Acc:Q9LDZ0]	TRINITY_DN57308_c0_g3_i2	EDP02463	0	Heat shock protein 70C [Source:UniProtKB/TrEMBL;Acc:A8IZU0]	TRINITY_DN57308_c0_g3_i2	BAA10059	0	DnaK protein	TRINITY_DN57308_c0_g3_i2	ENSP00000297185.3	0	heat shock protein family A (Hsp70) member 9 [Source:HGNC Symbol;Acc:HGNC:5244]	TRINITY_DN57308_c0_g3_i2	AAZ11933	0	heat shock 70 kDa protein, mitochondrial precursor, putative
TRINITY_DN57308_c0_g7	55	160	2.887	3.38771e-22	56	161	2.875	9.56646e-23	B	TRINITY_DN57308_c0_g7_i1	KWU41802.1	2.17e-108	heat shock cognate 70 [Rhodotorula sp. JG-1b]	TRINITY_DN57308_c0_g7_i1	Q5B2V1.1	6.49e-99	RecName: Full=Heat shock 70 kDa protein; AltName: Full=HSP70	TRINITY_DN57308_c0_g7_i1	AT5G02500.2	1.77e-89	Probable mediator of RNA polymerase II transcription subunit 37e [Source:UniProtKB/Swiss-Prot;Acc:P22953]	TRINITY_DN57308_c0_g7_i1	EDO97621	5.05e-80	Heat shock protein 70A [Source:UniProtKB/TrEMBL;Acc:A8JEU4]	TRINITY_DN57308_c0_g7_i1	BAA10059	4.92e-42	DnaK protein	TRINITY_DN57308_c0_g7_i1	ENSP00000434415.1	2.48e-96	heat shock protein family A (Hsp70) member 8 [Source:HGNC Symbol;Acc:HGNC:5241]	TRINITY_DN57308_c0_g7_i1	EAN80086	6.84e-92	heat shock protein 70
TRINITY_DN57364_c0_g1	4529	5031	1.111	0.000320305	4585	5076	1.107	0.00233141	B	TRINITY_DN57364_c0_g1_i3	XP_006679661.1	1.42e-113	hypothetical protein BATDEDRAFT_89133 [Batrachochytrium dendrobatidis JAM81]	TRINITY_DN57364_c0_g1_i3	P28748.1	9.25e-113	RecName: Full=GTP-binding nuclear protein spi1	TRINITY_DN57364_c0_g1_i3	AT5G20020.1	1.73e-104	GTP-binding nuclear protein [Source:UniProtKB/TrEMBL;Acc:A0A178UQ77]	TRINITY_DN57364_c0_g1_i3	EDP04368	2.46e-100	GTP-binding nuclear protein [Source:UniProtKB/TrEMBL;Acc:A8IRX5]					TRINITY_DN57364_c0_g1_i3	ENSP00000376176.2	1.58e-110	RAN, member RAS oncogene family [Source:HGNC Symbol;Acc:HGNC:9846]	TRINITY_DN57364_c0_g1_i3	AAZ10147	3.98e-114	GTP-binding nuclear protein rtb2, putative
TRINITY_DN57425_c0_g1	2627	2853	1.086	0.0162108	2659	2878	1.082	0.0483457	B	TRINITY_DN57425_c0_g1_i2	XP_016204278.1	1.02e-22	60S ribosomal protein L36-3 [Arachis ipaensis]	TRINITY_DN57425_c0_g1_i2	Q9LZ57.1	8.23e-21	RecName: Full=60S ribosomal protein L36-3	TRINITY_DN57425_c0_g1_i2	AT5G02450.1	9.73e-22	60S ribosomal protein L36-3 [Source:UniProtKB/Swiss-Prot;Acc:Q9LZ57]	TRINITY_DN57425_c0_g1_i2	EDO96564	3.42e-17	60S ribosomal protein L36 [Source:UniProtKB/TrEMBL;Acc:A8JHU2]					TRINITY_DN57425_c0_g1_i2	ENSP00000378081.2	8.14e-17	ribosomal protein L36 [Source:HGNC Symbol;Acc:HGNC:13631]	TRINITY_DN57425_c0_g1_i2	EAN77588	9.7e-19	ribosomal proteins L36, putative
TRINITY_DN57480_c0_g1	223	180	-1.23609	0.021097	225	182	-1.24069	0.00259243	B
TRINITY_DN57563_c1_g2	643	485	-1.3245	9.50715e-05	651	490	-1.32979	0.000511302	B
TRINITY_DN57601_c0_g1	32	206	6.514	5.66514e-59	32	208	6.474	2.01671e-63	B	TRINITY_DN57601_c0_g1_i4	KWU45618.1	1.31e-180	hypothetical protein RHOSPDRAFT_32926 [Rhodotorula sp. JG-1b]	TRINITY_DN57601_c0_g1_i4	Q7LKY2.1	1.9e-85	RecName: Full=Adducin-related protein C1289.14													TRINITY_DN57601_c0_g1_i4	ENSP00000399828.2	1.23e-37	adducin 1 [Source:HGNC Symbol;Acc:HGNC:243]
TRINITY_DN57751_c0_g2	185	249	1.35	0.0212288	187	252	1.344	0.0259834	B
TRINITY_DN57757_c1_g4	137	667	4.859	7.15514e-14	139	673	4.844	3.79317e-26	B	TRINITY_DN57757_c1_g4_i1	OBZ63473.1	2.89e-29	hypothetical protein A0H81_15005 [Grifola frondosa]	TRINITY_DN57757_c1_g4_i2	Q6CQE5.2	1.79e-15	RecName: Full=Protein TAR1
TRINITY_DN57772_c0_g1	330	195	-1.69205	3.17792e-11	334	196	-1.69779	2.23286e-10	B	TRINITY_DN57772_c0_g1_i4	XP_019350417.1	2.5e-09	PREDICTED: nuclear pore complex protein Nup153 isoform X3 [Alligator mississippiensis]	TRINITY_DN57772_c0_g1_i1	Q640Z6.1	1.6e-12	RecName: Full=Nuclear pore complex protein Nup153; AltName: Full=153 kDa nucleoporin; AltName: Full=Nucleoporin Nup153													TRINITY_DN57772_c0_g1_i1	ENSP00000444029.1	1.78e-09	nucleoporin 153 [Source:HGNC Symbol;Acc:HGNC:8062]
TRINITY_DN57879_c0_g1	562	473	-1.1919	0.00109509	570	477	-1.19474	0.00128522	B
TRINITY_DN57986_c0_g1	5653	6166	1.09	0.00320218	5722	6221	1.087	0.0129244	B	TRINITY_DN57986_c0_g1_i4	AAO72312.1	9.92e-81	L-3-hydroxyacyl-CoA dehydrogenase subunit precursor [Euglena gracilis]	TRINITY_DN57986_c0_g1_i4	P34439.1	1.79e-64	RecName: Full=Probable 3-hydroxyacyl-CoA dehydrogenase F54C8.1	TRINITY_DN57986_c0_g1_i4	AT3G15290.1	7.88e-50	3-hydroxyacyl-CoA dehydrogenase family protein [Source:UniProtKB/TrEMBL;Acc:Q9LDF5]	TRINITY_DN57986_c0_g1_i3	EDP03568	1.85e-42	3-hydroxyacyl-CoA dehydrogenase family protein [Source:Projected from Arabidopsis thaliana (AT3G15290) TAIR;Acc:AT3G15290]					TRINITY_DN57986_c0_g1_i4	ENSP00000312288.3	3.03e-59	hydroxyacyl-CoA dehydrogenase [Source:HGNC Symbol;Acc:HGNC:4799]
TRINITY_DN58348_c0_g1	6044	6674	1.104	5.29841e-05	6119	6734	1.1	0.00112189	B
TRINITY_DN58360_c10_g1	144	200	1.397	0.00421797	145	202	1.392	0.00324956	B	TRINITY_DN58360_c10_g1_i2	OHD11714.1	2.54e-19	hypothetical protein A2Y41_11415 [Spirochaetes bacterium GWB1_36_13]	TRINITY_DN58360_c10_g1_i2	P15710.1	3.89e-18	RecName: Full=Phosphate-repressible phosphate permease pho-4	TRINITY_DN58360_c10_g1_i2	AT3G26570.2	1.33e-11	phosphate transporter 2;1 [Source:TAIR;Acc:AT3G26570]	TRINITY_DN58360_c10_g1_i2	EDP05393	1.77e-21	Sodium/phosphate symporter [Source:UniProtKB/TrEMBL;Acc:A8ILT7]					TRINITY_DN58360_c10_g1_i2	ENSP00000429712.1	9.7e-17	solute carrier family 20 member 2 [Source:HGNC Symbol;Acc:HGNC:10947]	TRINITY_DN58360_c10_g1_i2	CAJ15956	2.35e-16	phosphate-repressible phosphate permease, putative
TRINITY_DN58423_c1_g3	208	155	-1.3459	0.0232629	211	156	-1.34953	0.0193799	B	TRINITY_DN58423_c1_g3_i4	GAX23913.1	2.64e-16	1,2-diacylglycerol 3-beta-galactosyltransferase [Fistulifera solaris]	TRINITY_DN58423_c1_g3_i3	Q9SI93.2	5.98e-10	RecName: Full=Monogalactosyldiacylglycerol synthase 3, chloroplastic; Short=AtMGD3; AltName: Full=MGDG synthase type C; Flags: Precursor	TRINITY_DN58423_c1_g3_i3	AT2G11810.1	7.07e-11	Monogalactosyldiacylglycerol synthase 3, chloroplastic [Source:UniProtKB/Swiss-Prot;Acc:Q9SI93]	TRINITY_DN58423_c1_g3_i4	EDP09106	7.1e-06	Predicted protein [Source:UniProtKB/TrEMBL;Acc:A8HUF1]
TRINITY_DN58452_c0_g1	106	66	-1.60514	0.000154791	107	67	-1.60772	2.6116e-05	B
TRINITY_DN58531_c2_g1	126	66	-1.93424	0.0459026	128	66	-1.93798	0.00259857	B	TRINITY_DN58531_c2_g1_i1	WP_052033484.1	2.66e-11	hypothetical protein [Rhodococcus wratislaviensis]
TRINITY_DN58579_c0_g2	130	61	-2.15517	8.89335e-09	132	61	-2.1645	2.3238e-08	B
TRINITY_DN58606_c1_g1	347	968	2.791	4.36968e-09	351	977	2.782	9.7126e-17	B	TRINITY_DN58606_c1_g1_i4	KRH17799.1	2.14e-115	hypothetical protein GLYMA_13G0171002, partial [Glycine max]	TRINITY_DN58606_c1_g1_i7	Q8TGM7.1	7.16e-31	RecName: Full=Putative uncharacterized protein ART2; AltName: Full=Antisense to ribosomal RNA transcript protein 2
TRINITY_DN58633_c0_g1	8376	9175	1.095	0.00106392	8479	9256	1.091	0.0050993	B	TRINITY_DN58633_c0_g1_i2	KVH99969.1	2.45e-92	60S ribosomal protein L4, C-terminal domain-containing protein [Cynara cardunculus var. scolymus]	TRINITY_DN58633_c0_g1_i2	Q9XF97.1	1.05e-90	RecName: Full=60S ribosomal protein L4; AltName: Full=L1	TRINITY_DN58633_c0_g1_i2	AT5G02870.1	9.47e-89	60S ribosomal protein L4-2 [Source:UniProtKB/Swiss-Prot;Acc:P49691]	TRINITY_DN58633_c0_g1_i2	EDP02388	2.06e-87	Ribosomal protein L4 [Source:UniProtKB/TrEMBL;Acc:A8J0I0]					TRINITY_DN58633_c0_g1_i2	ENSP00000311430.6	2.76e-81	ribosomal protein L4 [Source:HGNC Symbol;Acc:HGNC:10353]	TRINITY_DN58633_c0_g1_i2	AAZ10536	9.59e-86	60S ribosomal protein L4
TRINITY_DN58820_c1_g1	21754	23164	1.065	0.0252212	22022	23369	1.061	0.047353	B	TRINITY_DN58820_c1_g1_i3	BAM69086.1	1.13e-133	60S ribosomal protein L3, partial [Peranema trichophorum]	TRINITY_DN58820_c1_g1_i3	P35684.2	3.38e-125	RecName: Full=60S ribosomal protein L3	TRINITY_DN58820_c1_g1_i3	AT1G43170.4	1.72e-123	60S ribosomal protein L3-1 [Source:UniProtKB/Swiss-Prot;Acc:P17094]	TRINITY_DN58820_c1_g1_i3	EDP06420	2.34e-122	Ribosomal protein L3 [Source:UniProtKB/TrEMBL;Acc:A8ID84]					TRINITY_DN58820_c1_g1_i3	ENSP00000386101.1	3.13e-116	ribosomal protein L3 [Source:HGNC Symbol;Acc:HGNC:10332]	TRINITY_DN58820_c1_g1_i3	AAZ10771	5.86e-107	ribosomal protein L3, mitochondrial, putative
TRINITY_DN58836_c0_g1	558	472	-1.18064	0.00300905	565	476	-1.18483	0.00320635	B	TRINITY_DN58836_c0_g1_i18	XP_006293562.1	4.12e-47	hypothetical protein CARUB_v10022508mg [Capsella rubella]	TRINITY_DN58836_c0_g1_i18	Q7PC88.1	7.94e-48	RecName: Full=ABC transporter G family member 31; Short=ABC transporter ABCG.31; Short=AtABCG31; AltName: Full=Pleiotropic drug resistance protein 3	TRINITY_DN58836_c0_g1_i18	AT2G29940.1	9.39e-49	ABC transporter G family member 31 [Source:UniProtKB/Swiss-Prot;Acc:Q7PC88]	TRINITY_DN58836_c0_g1_i18	EDP02598	2.19e-43	Predicted protein [Source:UniProtKB/TrEMBL;Acc:A8IZY4]					TRINITY_DN58836_c0_g1_i18	ENSP00000237612.3	3.4e-11	ATP binding cassette subfamily G member 2 (Junior blood group) [Source:HGNC Symbol;Acc:HGNC:74]	TRINITY_DN58836_c0_g1_i18	EAN78143	4.43e-19	ATP-binding cassette protein, putative
TRINITY_DN58861_c0_g1	217	268	1.236	0.0371068	220	270	1.231	0.0286817	B	TRINITY_DN58861_c0_g1_i8	ETI55567.1	3.34e-74	hypothetical protein F443_01741 [Phytophthora parasitica P1569]	TRINITY_DN58861_c0_g1_i8	Q9JII1.1	1.95e-41	RecName: Full=72 kDa inositol polyphosphate 5-phosphatase; AltName: Full=Phosphatidylinositol 4,5-bisphosphate 5-phosphatase; AltName: Full=Phosphatidylinositol polyphosphate 5-phosphatase type IV; Flags: Precursor	TRINITY_DN58861_c0_g1_i8	AT1G47510.1	3.54e-35	Type IV inositol polyphosphate 5-phosphatase 11 [Source:UniProtKB/Swiss-Prot;Acc:Q5EAF2]	TRINITY_DN58861_c0_g1_i8	EDP08917	9.6e-24	Predicted protein [Source:UniProtKB/TrEMBL;Acc:A8HRB1]					TRINITY_DN58861_c0_g1_i8	ENSP00000360777.3	3.53e-41	inositol polyphosphate-5-phosphatase E [Source:HGNC Symbol;Acc:HGNC:21474]	TRINITY_DN58861_c0_g1_i8	EAN77967	6.98e-30	endonuclease/exonuclease/phosphatase, putative
TRINITY_DN58875_c2_g4	11256	10435	-1.07875	0.00563087	11397	10529	-1.08225	0.0171914	B
TRINITY_DN58879_c0_g1	294	1046	3.564	1.2662e-17	297	1056	3.553	1.28891e-30	B	TRINITY_DN58879_c0_g1_i14	GAO47202.1	3.58e-66	hypothetical protein G7K_1412-t1 [Saitoella complicata NRRL Y-17804]									TRINITY_DN58879_c0_g1_i13	EDO95983	1.03e-26	Predicted protein [Source:UniProtKB/TrEMBL;Acc:A8JJG4]
TRINITY_DN58885_c0_g1	82	244	2.997	2.45572e-09	82	247	2.984	9.47239e-16	B	TRINITY_DN58885_c0_g1_i1	KYG39732.1	4.79e-62	hypothetical protein M433DRAFT_79555, partial [Acidomyces richmondensis BFW]	TRINITY_DN58885_c0_g1_i8	Q8TGM5.1	2.72e-18	RecName: Full=Putative uncharacterized protein ART3; AltName: Full=Antisense to ribosomal RNA transcript protein 3
TRINITY_DN58889_c0_g1	152	104	-1.46843	0.000823125	154	104	-1.47275	0.000329725	B	TRINITY_DN58889_c0_g1_i5	XP_004340994.1	7.71e-14	Zn-finger in Ran binding protein and others domain containing protein [Acanthamoeba castellanii str. Neff]					TRINITY_DN58889_c0_g1_i5	AT1G48570.1	9.66e-11	Putative uncharacterized protein At1g48570 [Source:UniProtKB/TrEMBL;Acc:Q9LP67]													TRINITY_DN58889_c0_g1_i5	AAQ16064	1.57e-08	hypothetical protein, conserved	Chloride and Zinc channels may likely shuttle HgCl2 complexes
TRINITY_DN58924_c5_g2	4056	3785	-1.07181	0.0296319	4107	3819	-1.07527	0.0407375	B	TRINITY_DN58924_c5_g2_i5	OLP84158.1	6.63e-20	putative aldo-keto reductase 1 [Symbiodinium microadriaticum]	TRINITY_DN58924_c5_g2_i5	F4HPY8.1	1.72e-11	RecName: Full=Probable aldo-keto reductase 6	TRINITY_DN58924_c5_g2_i5	AT1G60750.1	2.03e-12	Probable aldo-keto reductase 6 [Source:UniProtKB/Swiss-Prot;Acc:F4HPY8]	TRINITY_DN58924_c5_g2_i3	EDO99318	4.92e-06	Predicted protein [Source:UniProtKB/TrEMBL;Acc:A8JA38]
TRINITY_DN58935_c2_g1	1927	2123	1.101	0.014811	1951	2142	1.098	0.0294653	B	TRINITY_DN58935_c2_g1_i3	XP_019850969.1	9.56e-10	PREDICTED: zinc metalloproteinase nas-14-like [Amphimedon queenslandica]	TRINITY_DN58935_c2_g1_i2	P35446.1	5.24e-09	RecName: Full=Spondin-1; AltName: Full=F-spondin; Flags: Precursor													TRINITY_DN58935_c2_g1_i2	ENSP00000381550.1	1.73e-09	adhesion G protein-coupled receptor B2 [Source:HGNC Symbol;Acc:HGNC:944]
TRINITY_DN58940_c5_g2	5038	5449	1.081	0.00351818	5101	5497	1.078	0.0187038	B	TRINITY_DN58940_c5_g2_i1	Q2PDF6.1	0	RecName: Full=Adenosylcobalamin-dependent ribonucleoside-triphosphate reductase; Short=RTPR	TRINITY_DN58940_c5_g2_i1	Q2PDF6.1	0	RecName: Full=Adenosylcobalamin-dependent ribonucleoside-triphosphate reductase; Short=RTPR					TRINITY_DN58940_c5_g2_i1	EDO96677	1.88e-35	Hypothetical nucleotide reductase [Source:UniProtKB/TrEMBL;Acc:A8JHG1]
TRINITY_DN58964_c2_g2	284	336	1.182	0.0329285	287	338	1.178	0.0144506	B	TRINITY_DN58964_c2_g2_i3	OMJ91632.1	1.41e-11	hypothetical protein SteCoe_5782 [Stentor coeruleus]
TRINITY_DN59039_c1_g1	172	116	-1.47275	0.000149795	174	117	-1.47929	4.45046e-05	B
TRINITY_DN59076_c0_g1	330	261	-1.26422	0.00434162	334	264	-1.26743	0.00267796	B	TRINITY_DN59076_c0_g1_i11	XP_013626053.1	2.7e-30	PREDICTED: ABC transporter G family member 34-like [Brassica oleracea var. oleracea]	TRINITY_DN59076_c0_g1_i11	Q7PC84.1	2.71e-30	RecName: Full=ABC transporter G family member 39; Short=ABC transporter ABCG.39; Short=AtABCG39; AltName: Full=Pleiotropic drug resistance protein 11	TRINITY_DN59076_c0_g1_i11	AT1G66950.1	3.21e-31	ABC transporter G family member 39 [Source:UniProtKB/Swiss-Prot;Acc:Q7PC84]	TRINITY_DN59076_c0_g1_i11	EDO99773	3.46e-24	ABC transporter [Source:UniProtKB/TrEMBL;Acc:A8J8F1]	TRINITY_DN59076_c0_g1_i1	BAA18655	2.47e-10	sulfate transport system permease protein	TRINITY_DN59076_c0_g1_i11	ENSP00000426917.1	1.39e-13	ATP binding cassette subfamily G member 2 (Junior blood group) [Source:HGNC Symbol;Acc:HGNC:74]	TRINITY_DN59076_c0_g1_i11	EAN76672	6.22e-13	ABC transporter, putative
TRINITY_DN59087_c0_g1	6887	7462	1.083	0.0123837	6972	7528	1.08	0.0350363	B	TRINITY_DN59087_c0_g1_i2	CCC96109.1	1.28e-64	unnamed protein product [Trypanosoma congolense IL3000]	TRINITY_DN59087_c0_g1_i2	P29766.1	9.07e-64	RecName: Full=60S ribosomal protein L8; AltName: Full=L2; AltName: Full=Ribosomal protein TL2	TRINITY_DN59087_c0_g1_i2	AT4G36130.1	1.12e-63	60S ribosomal protein L8-3 [Source:UniProtKB/Swiss-Prot;Acc:Q42064]	TRINITY_DN59087_c0_g1_i2	EDP03554	4.44e-63	Ribosomal protein L8 [Source:UniProtKB/TrEMBL;Acc:A8IVK1]	TRINITY_DN59087_c0_g1_i2	BAA17346	1.12e-07	50S ribosomal protein L2	TRINITY_DN59087_c0_g1_i2	ENSP00000433464.2	3.21e-54	ribosomal protein L8 [Source:HGNC Symbol;Acc:HGNC:10368]	TRINITY_DN59087_c0_g1_i2	AAZ11226	1.29e-68	60S ribosomal protein L2, putative
TRINITY_DN59146_c0_g1	1044	753	-1.38504	0.0319453	1059	760	-1.39276	0.000655207	B	TRINITY_DN59146_c0_g1_i1	XP_007247485.1	1.72e-11	E3 ubiquitin-protein ligase XIAP [Astyanax mexicanus]	TRINITY_DN59146_c0_g1_i11	Q9GLN5.1	9.72e-12	RecName: Full=Baculoviral IAP repeat-containing protein 5; AltName: Full=Apoptosis inhibitor survivin													TRINITY_DN59146_c0_g1_i11	ENSP00000393596.2	6.56e-12	baculoviral IAP repeat containing 6 [Source:HGNC Symbol;Acc:HGNC:13516]
TRINITY_DN59273_c6_g1	4922	5451	1.107	3.01072e-05	4983	5500	1.104	0.000854707	B	TRINITY_DN59273_c6_g1_i2	EJW85450.1	4.19e-30	elongation factor 2 [Wuchereria bancrofti]	TRINITY_DN59273_c6_g1_i2	Q3SYU2.3	5.71e-29	RecName: Full=Elongation factor 2; Short=EF-2	TRINITY_DN59273_c6_g1_i2	AT1G56070.1	1.28e-22	Elongation factor 2 [Source:UniProtKB/Swiss-Prot;Acc:Q9ASR1]	TRINITY_DN59273_c6_g1_i2	EDO96511	2.36e-21	Elongation factor 2 [Source:UniProtKB/TrEMBL;Acc:A8JHX9]					TRINITY_DN59273_c6_g1_i2	ENSP00000307940.5	3.53e-29	eukaryotic translation elongation factor 2 [Source:HGNC Symbol;Acc:HGNC:3214]	TRINITY_DN59273_c6_g1_i2	EAN77875	1.32e-29	elongation factor 2
TRINITY_DN59275_c0_g1	174	128	-1.37174	0.00583598	177	128	-1.37552	0.00275339	B
TRINITY_DN59275_c0_g2	492	408	-1.20482	0.00400078	498	412	-1.20919	0.00591587	B	TRINITY_DN59275_c0_g2_i6	WP_006098746.1	7.15e-15	hypothetical protein [Coleofasciculus chthonoplastes]	TRINITY_DN59275_c0_g2_i1	O86488.1	7.93e-13	RecName: Full=Serine-aspartate repeat-containing protein D; Flags: Precursor
TRINITY_DN59309_c0_g1	2787	3120	1.119	0.000275199	2821	3147	1.115	0.00188548	B	TRINITY_DN59309_c0_g1_i2	GAQ83942.1	1.74e-29	amino acid transporter protein [Klebsormidium nitens]	TRINITY_DN59309_c0_g1_i2	Q9ZU50.2	3.42e-23	RecName: Full=Amino-acid permease BAT1; AltName: Full=Bidirectional amino acid transporter 1; AltName: Full=GABA permease; Short=AtGABP	TRINITY_DN59309_c0_g1_i2	AT2G01170.1	4.04e-24	Amino-acid permease BAT1 [Source:UniProtKB/Swiss-Prot;Acc:Q9ZU50]
TRINITY_DN59530_c0_g1	119	80	-1.49925	0.00513307	120	80	-1.50376	0.00302341	B
TRINITY_DN59605_c0_g1	4833	4318	-1.11982	1.55413e-06	4894	4356	-1.1236	3.46953e-05	B	TRINITY_DN59605_c0_g1_i3	KXK52605.1	3.7e-148	pyridoxal biosynthesis lyase PdxS [Chloroflexi bacterium OLB13]	TRINITY_DN59605_c0_g1_i3	A9WFT9.1	7.49e-147	RecName: Full=Pyridoxal 5'-phosphate synthase subunit PdxS; Short=PLP synthase subunit PdxS; AltName: Full=Pdx1	TRINITY_DN59605_c0_g1_i3	AT5G01410.2	1.08e-147	RSR4 [Source:UniProtKB/TrEMBL;Acc:A0A178UIV6]
TRINITY_DN59636_c1_g1	1050	850	-1.23609	8.33209e-05	1063	857	-1.24069	0.000316594	B	TRINITY_DN59636_c1_g1_i7	WP_024334347.1	1.99e-55	propionyl-CoA synthetase [Desulfotignum balticum]	TRINITY_DN59636_c1_g1_i7	P28812.2	2.18e-46	RecName: Full=Uncharacterized protein PA3568	TRINITY_DN59636_c1_g1_i7	AT5G36880.4	5.45e-27	Acetyl-coenzyme A synthetase, chloroplastic/glyoxysomal [Source:UniProtKB/Swiss-Prot;Acc:B9DGD6]	TRINITY_DN59636_c1_g1_i7	EDO98345	5.2e-27	Acetyl CoA synthetase [Source:UniProtKB/TrEMBL;Acc:A8JCQ8]	TRINITY_DN59636_c1_g1_i7	BAA10498	1.42e-32	acetyl-coenzyme A synthetase	TRINITY_DN59636_c1_g1_i7	ENSP00000261206.3	1.03e-45	acyl-CoA synthetase short-chain family member 3 [Source:HGNC Symbol;Acc:HGNC:24723]	TRINITY_DN59636_c1_g1_i7	AAZ13019	3.41e-23	acetyl-CoA synthetase, putative
TRINITY_DN59777_c1_g1	346	408	1.177	0.0145934	350	411	1.173	0.0085481	B	TRINITY_DN59777_c1_g1_i4	XP_819694.1	2.92e-29	hypothetical protein [Trypanosoma cruzi strain CL Brener]	TRINITY_DN59777_c1_g1_i5	P0C6F1.1	1.71e-11	RecName: Full=Dynein heavy chain 2, axonemal; AltName: Full=Axonemal beta dynein heavy chain 2; AltName: Full=Ciliary dynein heavy chain 2					TRINITY_DN59777_c1_g1_i5	EDP02244	1.29e-11	Dynein heavy chain 2 [Source:UniProtKB/TrEMBL;Acc:A8J063]					TRINITY_DN59777_c1_g1_i5	ENSP00000373825.2	5.08e-12	dynein axonemal heavy chain 2 [Source:HGNC Symbol;Acc:HGNC:2948]	TRINITY_DN59777_c1_g1_i3	EAN77706	2.4e-25	hypothetical protein, conserved
TRINITY_DN59829_c1_g1	777	926	1.191	1.24532e-05	787	934	1.187	6.00077e-05	B
TRINITY_DN59862_c2_g1	267	204	-1.30719	0.0388499	270	206	-1.31234	0.0315976	B
TRINITY_DN59896_c7_g1	140	92	-1.51976	0.0018606	142	93	-1.52439	0.00142327	B
TRINITY_DN59899_c0_g1	606	689	1.137	0.0112003	614	695	1.133	0.0173833	B	TRINITY_DN59899_c0_g1_i6	GAX81834.1	5.52e-74	hypothetical protein CEUSTIGMA_g9262.t1 [Chlamydomonas eustigma]	TRINITY_DN59899_c0_g1_i4	Q6AUG0.1	1.95e-73	RecName: Full=Splicing factor U2af small subunit B; AltName: Full=U2 auxiliary factor 35 kDa subunit B; AltName: Full=U2 small nuclear ribonucleoprotein auxiliary factor small subunit B; Short=U2 snRNP auxiliary factor small subunit B; AltName: Full=Zinc	TRINITY_DN59899_c0_g1_i4	AT5G42820.2	1.83e-73	U2AF35B [Source:UniProtKB/TrEMBL;Acc:A0A178UM74]	TRINITY_DN59899_c0_g1_i4	EDP08396	9.03e-76	U2 snRNP auxiliary factor, small subunit [Source:UniProtKB/TrEMBL;Acc:A8HYQ9]					TRINITY_DN59899_c0_g1_i6	ENSP00000482964.1	6.75e-66	U2 small nuclear RNA auxiliary factor 1 like 5 [Source:HGNC Symbol;Acc:HGNC:51830]	TRINITY_DN59899_c0_g1_i6	EAN77744	8.24e-45	U2 splicing auxiliary factor, putative
TRINITY_DN59915_c6_g1	914	1063	1.163	0.0108587	926	1072	1.159	0.0262359	B
TRINITY_DN59962_c4_g1	3769	2267	-1.66113	0.000145111	3818	2289	-1.66667	1.43682e-08	B	TRINITY_DN59962_c4_g1_i2	ABW06956.1	2.15e-44	chloroplast light-harvesting complex II protein precursor, partial [Euglena gracilis]	TRINITY_DN59962_c4_g1_i2	P22686.1	8.63e-31	RecName: Full=Chlorophyll a-b binding protein of LHCII type I, chloroplastic; Short=CAB; Short=LHCP; Flags: Precursor	TRINITY_DN59962_c4_g1_i2	AT1G29910.1	5.49e-31	Chlorophyll a-b binding protein 3, chloroplastic [Source:UniProtKB/Swiss-Prot;Acc:Q8VZ87]	TRINITY_DN59962_c4_g1_i2	EDP00188	7.55e-35	Chlorophyll a-b binding protein, chloroplastic [Source:UniProtKB/TrEMBL;Acc:Q9ZSJ4]													Organelles, especially chloroplasts can act as a metal sink within the cell. An upregulation in these genes can account for more places for excess Hg to reside
TRINITY_DN59962_c4_g2	6626	4056	-1.63399	0.000124419	6712	4094	-1.63934	1.20904e-08	B	TRINITY_DN59962_c4_g2_i1	ABW06956.1	5.57e-63	chloroplast light-harvesting complex II protein precursor, partial [Euglena gracilis]	TRINITY_DN59962_c4_g2_i1	P27517.1	2.19e-45	RecName: Full=Chlorophyll a-b binding protein of LHCII type I, chloroplastic; Short=CAB; Short=LHCP; Flags: Precursor	TRINITY_DN59962_c4_g2_i1	AT1G29930.1	2.77e-44	Chlorophyll a-b binding protein 1, chloroplastic [Source:UniProtKB/Swiss-Prot;Acc:P04778]	TRINITY_DN59962_c4_g2_i1	EDO98358	7.15e-49	Chlorophyll a-b binding protein, chloroplastic [Source:UniProtKB/TrEMBL;Acc:A8JCU4]													Organelles, especially chloroplasts can act as a metal sink within the cell. An upregulation in these genes can account for more places for excess Hg to reside
TRINITY_DN59962_c5_g2	3912	3477	-1.12486	0.00167537	3962	3509	-1.12867	0.00654336	B	TRINITY_DN59962_c5_g2_i3	ABW06957.1	2.62e-96	chloroplast light-harvesting complex II protein precursor, partial [Euglena gracilis]	TRINITY_DN59962_c5_g2_i3	P08976.1	1.75e-35	RecName: Full=Light-harvesting complex I LH38 proteins; Contains: RecName: Full=LH38 protein 1; Contains: RecName: Full=LH38 protein 2; Contains: RecName: Full=LH38 protein 3; Flags: Precursor	TRINITY_DN59962_c5_g2_i3	AT2G05100.1	9.33e-29	photosystem II light harvesting complex gene 2.1 [Source:TAIR;Acc:AT2G05100]	TRINITY_DN59962_c5_g2_i3	EDO98358	2.52e-28	Chlorophyll a-b binding protein, chloroplastic [Source:UniProtKB/TrEMBL;Acc:A8JCU4]													Organelles, especially chloroplasts can act as a metal sink within the cell. An upregulation in these genes can account for more places for excess Hg to reside
TRINITY_DN59962_c7_g1	1670	1062	-1.57233	0.0114667	1693	1072	-1.57978	5.78901e-05	B	TRINITY_DN59962_c7_g1_i1	ABW06956.1	1.14e-24	chloroplast light-harvesting complex II protein precursor, partial [Euglena gracilis]	TRINITY_DN59962_c7_g1_i1	P04159.1	9.81e-17	RecName: Full=Chlorophyll a-b binding protein AB96; AltName: Full=LHCII type I CAB-AB96; Short=LHCP; AltName: Full=Major 15	TRINITY_DN59962_c7_g1_i1	AT1G29910.1	1.4e-16	Chlorophyll a-b binding protein 3, chloroplastic [Source:UniProtKB/Swiss-Prot;Acc:Q8VZ87]	TRINITY_DN59962_c7_g1_i1	EDO98358	2.99e-18	Chlorophyll a-b binding protein, chloroplastic [Source:UniProtKB/TrEMBL;Acc:A8JCU4]													Organelles, especially chloroplasts can act as a metal sink within the cell. An upregulation in these genes can account for more places for excess Hg to reside
TRINITY_DN59976_c1_g2	9011	9899	1.099	0.000256312	9123	9986	1.095	0.00267796	B	TRINITY_DN59976_c1_g2_i1	KNH05013.1	4.66e-87	60S acidic ribosomal subunit protein [Perkinsela sp. CCAP 1560/4]	TRINITY_DN59976_c1_g2_i1	P26796.2	7.86e-83	RecName: Full=60S acidic ribosomal protein P0	TRINITY_DN59976_c1_g2_i1	AT3G11250.1	1.42e-78	60S acidic ribosomal protein P0-3 [Source:UniProtKB/Swiss-Prot;Acc:P57691]	TRINITY_DN59976_c1_g2_i1	EDP00752	2.17e-80	60S acidic ribosomal protein P0 [Source:UniProtKB/TrEMBL;Acc:A8J5Z0]					TRINITY_DN59976_c1_g2_i1	ENSP00000339027.3	1.41e-71	ribosomal protein lateral stalk subunit P0 [Source:HGNC Symbol;Acc:HGNC:10371]	TRINITY_DN59976_c1_g2_i1	EAN79177	3.08e-85	60S acidic ribosomal subunit protein, putative	Organelles, especially chloroplasts can act as a metal sink within the cell. An upregulation in these genes can account for more places for excess Hg to reside
TRINITY_DN60113_c4_g2	124	87	-1.42653	0.0119338	126	88	-1.43266	0.00668803	B	TRINITY_DN60113_c4_g2_i3	1N0R_A	9.67e-26	Chain A, 4ank: A Designed Ankyrin Repeat Protein With Four Identical Consensus Repeats	TRINITY_DN60113_c4_g2_i4	Q9ULJ7.4	1.5e-20	RecName: Full=Ankyrin repeat domain-containing protein 50	TRINITY_DN60113_c4_g2_i4	AT2G03430.1	7.25e-14	Ankyrin repeat family protein [Source:UniProtKB/TrEMBL;Acc:Q8GZ22]	TRINITY_DN60113_c4_g2_i3	EDP07181	4.87e-22	Predicted protein [Source:UniProtKB/TrEMBL;Acc:A8I5J0]	TRINITY_DN60113_c4_g2_i3	BAA16778	2.94e-13	erythroid ankyrin	TRINITY_DN60113_c4_g2_i4	ENSP00000425355.1	2.57e-21	ankyrin repeat domain 50 [Source:HGNC Symbol;Acc:HGNC:29223]	TRINITY_DN60113_c4_g2_i2	AAZ10708	2.67e-12	ankyrin, putative
TRINITY_DN60114_c17_g1	3535	3813	1.078	0.00474499	3580	3847	1.075	0.0286627	B
TRINITY_DN60121_c8_g2	4532	5137	1.134	4.19952e-05	4587	5183	1.13	0.000535578	B
TRINITY_DN60122_c6_g1	1187	383	-3.10559	5.37939e-11	1204	386	-3.11526	6.19049e-19	B
TRINITY_DN60139_c4_g1	154	93	-1.65563	0.000270844	156	94	-1.66389	0.000335352	B
TRINITY_DN60148_c2_g1	136	192	1.41	0.0012911	138	194	1.405	0.000733238	B	TRINITY_DN60148_c2_g1_i1	XP_003058515.1	1.89e-07	predicted protein [Micromonas pusilla CCMP1545]	TRINITY_DN60148_c2_g1_i1	Q56V19.1	1.21e-07	RecName: Full=Muscleblind-like protein 3; AltName: Full=Tmbnl3													TRINITY_DN60148_c2_g1_i1	ENSP00000402128.1	3.2e-08	muscleblind like splicing regulator 3 [Source:HGNC Symbol;Acc:HGNC:20564]
TRINITY_DN60176_c1_g1	328	276	-1.18765	0.0436489	332	278	-1.1919	0.0237588	B
TRINITY_DN60178_c6_g1	5213	5658	1.085	0.00387095	5278	5708	1.081	0.018756	B	TRINITY_DN60178_c6_g1_i5	XP_008294212.1	3.21e-81	PREDICTED: ADP-ribosylation factor-like protein 3 [Stegastes partitus]	TRINITY_DN60178_c6_g1_i5	B5FYQ0.1	3.84e-81	RecName: Full=ADP-ribosylation factor-like protein 3	TRINITY_DN60178_c6_g1_i5	AT2G18390.1	3.29e-60	TTN5 [Source:UniProtKB/TrEMBL;Acc:A0A178VQD7]	TRINITY_DN60178_c6_g1_i5	EDP04202	1.32e-76						TRINITY_DN60178_c6_g1_i5	ENSP00000260746.4	7.89e-75	ADP ribosylation factor like GTPase 3 [Source:HGNC Symbol;Acc:HGNC:694]	TRINITY_DN60178_c6_g1_i5	AAZ10378	5.05e-79	ADP-ribosylation factor-like protein 3A, putative
TRINITY_DN60242_c0_g1	192	150	-1.28041	0.0183487	195	152	-1.2837	0.00476881	B	TRINITY_DN60242_c0_g1_i6	XP_004995011.1	1.77e-37	multidrug resistance associated protein 1 [Salpingoeca rosetta]	TRINITY_DN60242_c0_g1_i4	O15439.3	6.62e-32	RecName: Full=Multidrug resistance-associated protein 4; AltName: Full=ATP-binding cassette sub-family C member 4; AltName: Full=MRP/cMOAT-related ABC transporter; AltName: Full=Multi-specific organic anion transporter B; Short=MOAT-B	TRINITY_DN60242_c0_g1_i6	AT1G04120.2	1.14e-18	MRP5 [Source:UniProtKB/TrEMBL;Acc:A0A178WGC2]	TRINITY_DN60242_c0_g1_i3	EDO96832	8.62e-20	Predicted protein [Source:UniProtKB/TrEMBL;Acc:A8JGZ5]					TRINITY_DN60242_c0_g1_i4	ENSP00000487081.1	1.09e-32	ATP binding cassette subfamily C member 4 [Source:HGNC Symbol;Acc:HGNC:55]	TRINITY_DN60242_c0_g1_i2	AAZ11039	1.36e-12	multidrug resistance protein E
TRINITY_DN60415_c1_g3	18	113	6.24	4.78258e-32	18	114	6.191	1.31358e-32	B	TRINITY_DN60415_c1_g3_i1	KWU42166.1	2.46e-127	ADP-ribosylation factor 1 like-protein [Rhodotorula sp. JG-1b]	TRINITY_DN60415_c1_g3_i1	O48920.3	2.2e-121	RecName: Full=ADP-ribosylation factor	TRINITY_DN60415_c1_g3_i1	AT1G10630.1	1.29e-121	ADP-ribosylation factor A1F [Source:UniProtKB/TrEMBL;Acc:Q6ID97]	TRINITY_DN60415_c1_g3_i1	EDP05339	2.75e-117	Small ARF-related GTPase [Source:UniProtKB/TrEMBL;Acc:A8IL29]					TRINITY_DN60415_c1_g3_i1	ENSP00000440005.1	9.04e-120	ADP ribosylation factor 1 [Source:HGNC Symbol;Acc:HGNC:652]	TRINITY_DN60415_c1_g3_i1	EAN77256	6.89e-103	ADP-ribosylation factor, putative
TRINITY_DN60415_c1_g4	720	807	1.12	0.018943	729	814	1.116	0.0294708	B	TRINITY_DN60415_c1_g4_i1	XP_002508406.1	1.95e-68	peptidyl-prolyl cis-trans isomerase [Micromonas commoda]	TRINITY_DN60415_c1_g4_i1	P42693.1	1.35e-22	RecName: Full=Peptidyl-prolyl cis-trans isomerase; Short=PPIase; AltName: Full=Rotamase; Flags: Precursor	TRINITY_DN60415_c1_g4_i1	AT1G01940.1	8.56e-20	Peptidyl-prolyl cis-trans isomerase CYP18-1 [Source:UniProtKB/Swiss-Prot;Acc:Q9LPC7]	TRINITY_DN60415_c1_g4_i1	EDP07445	1.8e-22	Peptidyl-prolyl cis-trans isomerase [Source:UniProtKB/TrEMBL;Acc:A8I427]	TRINITY_DN60415_c1_g4_i1	BAA16711	1.29e-12	peptidyl-prolyl cis-trans isomerase B	TRINITY_DN60415_c1_g4_i1	ENSP00000362803.5	1e-19	peptidylprolyl isomerase like 1 [Source:HGNC Symbol;Acc:HGNC:9260]	TRINITY_DN60415_c1_g4_i1	AAZ12541	1.01e-15	cyclophilin-type peptidyl-prolyl cis-trans isomerase, putative
TRINITY_DN60455_c2_g3	5390	5831	1.082	0.00295633	5456	5882	1.078	0.0195082	B
TRINITY_DN60456_c0_g1	1622	1450	-1.11857	0.00921909	1642	1462	-1.12233	0.0138624	B	TRINITY_DN60456_c0_g1_i5	KPI87031.1	7.92e-24	putative kinesin [Leptomonas seymouri]	TRINITY_DN60456_c0_g1_i1	Q9FZ06.1	5.87e-23	RecName: Full=Kinesin-like protein KIN-UA; AltName: Full=AtKINUa; AltName: Full=Protein ARMADILLO REPEAT KINESIN3; AltName: Full=Protein ARMADILLO REPEAT-CONTAINING KINESIN 3; AltName: Full=kinesin-like protein PAK	TRINITY_DN60456_c0_g1_i1	AT1G12430.2	6.18e-24	Kinesin-like protein [Source:UniProtKB/TrEMBL;Acc:F4IC87]	TRINITY_DN60456_c0_g1_i1	EDP00849	8.38e-18	Kinesin-like protein [Source:UniProtKB/TrEMBL;Acc:A8J4Z2]					TRINITY_DN60456_c0_g1_i1	ENSP00000368020.3	7.56e-18	kinesin family member 3A [Source:HGNC Symbol;Acc:HGNC:6319]	TRINITY_DN60456_c0_g1_i5	AAZ11997	3.32e-21	kinesin, putative
TRINITY_DN60465_c2_g2	10670	11858	1.111	5.55516e-06	10802	11963	1.107	0.000172507	B	TRINITY_DN60465_c2_g2_i2	AAO72312.1	2.03e-176	L-3-hydroxyacyl-CoA dehydrogenase subunit precursor [Euglena gracilis]	TRINITY_DN60465_c2_g2_i2	Q9WVK7.1	2.74e-59	RecName: Full=Hydroxyacyl-coenzyme A dehydrogenase, mitochondrial; Short=HCDH; AltName: Full=Medium and short-chain L-3-hydroxyacyl-coenzyme A dehydrogenase; AltName: Full=Short-chain 3-hydroxyacyl-CoA dehydrogenase; Flags: Precursor	TRINITY_DN60465_c2_g2_i2	AT3G15290.1	3.18e-43	3-hydroxyacyl-CoA dehydrogenase family protein [Source:UniProtKB/TrEMBL;Acc:Q9LDF5]	TRINITY_DN60465_c2_g2_i2	EDP03568	2.37e-34	3-hydroxyacyl-CoA dehydrogenase family protein [Source:Projected from Arabidopsis thaliana (AT3G15290) TAIR;Acc:AT3G15290]					TRINITY_DN60465_c2_g2_i2	ENSP00000312288.3	5.1e-57	hydroxyacyl-CoA dehydrogenase [Source:HGNC Symbol;Acc:HGNC:4799]
TRINITY_DN60527_c1_g1	800	721	-1.10865	0.0451219	810	727	-1.11235	0.0386684	B	TRINITY_DN60527_c1_g1_i16	XP_002178319.1	3.69e-30	predicted protein [Phaeodactylum tricornutum CCAP 1055/1]	TRINITY_DN60527_c1_g1_i10	Q93ZN2.1	4.02e-19	RecName: Full=Probable aldo-keto reductase 4	TRINITY_DN60527_c1_g1_i10	AT1G60710.1	4.76e-20	Probable aldo-keto reductase 4 [Source:UniProtKB/Swiss-Prot;Acc:Q93ZN2]	TRINITY_DN60527_c1_g1_i12	EDO99318	6.87e-13	Predicted protein [Source:UniProtKB/TrEMBL;Acc:A8JA38]	TRINITY_DN60527_c1_g1_i12	BAA18005	5.53e-06
TRINITY_DN60535_c11_g1	444	318	-1.39276	5.87819e-05	450	321	-1.3986	0.000239053	B	TRINITY_DN60535_c11_g1_i1	AAA16605.1	2.21e-30	light harvesting chlorophyll a/b binding protein of PSII, partial [Euglena gracilis]	TRINITY_DN60535_c11_g1_i2	P09755.1	2.52e-22	RecName: Full=Chlorophyll a-b binding protein 2, chloroplastic; AltName: Full=LHCII type I CAB-2; Short=LHCP; Flags: Precursor	TRINITY_DN60535_c11_g1_i2	AT2G34420.1	1.01e-22	Chlorophyll a-b binding protein, chloroplastic [Source:UniProtKB/TrEMBL;Acc:Q39141]	TRINITY_DN60535_c11_g1_i2	EDP01724	6.95e-25	Chlorophyll a-b binding protein, chloroplastic [Source:UniProtKB/TrEMBL;Acc:Q8S3T9]
TRINITY_DN60636_c2_g1	5805	4700	-1.23457	3.10315e-11	5878	4741	-1.23916	5.9479e-09	B	TRINITY_DN60636_c2_g1_i1	OQS07123.1	6.94e-26	FMN-binding negative transcriptional regulator [Thraustotheca clavata]	TRINITY_DN60636_c2_g1_i1	P36087.1	3.29e-08	RecName: Full=Uncharacterized protein YKL070W
TRINITY_DN60673_c0_g1	620	376	-1.65017	3.91836e-06	628	379	-1.65563	3.52008e-09	B	TRINITY_DN60673_c0_g1_i4	KNC36057.1	3.56e-20	hypothetical protein PFLG_01221 [Plasmodium falciparum RAJ116]									TRINITY_DN60673_c0_g1_i1	EDP00487	7.15e-09	Flagellar associated protein [Source:UniProtKB/TrEMBL;Acc:A8J6L0]
TRINITY_DN60702_c5_g2	695	903	1.299	3.03511e-06	704	911	1.294	2.14675e-05	B
TRINITY_DN60710_c2_g1	3125	3385	1.083	0.0137553	3164	3415	1.079	0.0407375	B	TRINITY_DN60710_c2_g1_i2	CUG30453.1	0	69 kDa paraflagellar rod protein 2C, putative [Bodo saltans]	TRINITY_DN60710_c2_g1_i2	P22225.1	0	RecName: Full=69 kDa paraflagellar rod protein; Short=69 kDa PFR protein; AltName: Full=PFR-A/PFR-B																	TRINITY_DN60710_c2_g1_i2	AAZ13263	0	69 kDa paraflagellar rod protein
TRINITY_DN60780_c1_g1	796	586	-1.3587	3.73118e-12	806	591	-1.36426	2.99746e-10	B
TRINITY_DN60807_c2_g1	4160	4506	1.083	0.00132894	4212	4546	1.079	0.0144332	B	TRINITY_DN60807_c2_g1_i12	BAO53977.1	0	peroxiredoxin [Euglena gracilis]	TRINITY_DN60807_c2_g1_i12	Q6ER94.1	2.95e-103	RecName: Full=2-Cys peroxiredoxin BAS1, chloroplastic; AltName: Full=Thiol-specific antioxidant protein; Flags: Precursor	TRINITY_DN60807_c2_g1_i12	AT3G11630.1	1.29e-101	2-Cys peroxiredoxin BAS1, chloroplastic [Source:UniProtKB/Swiss-Prot;Acc:Q96291]	TRINITY_DN60807_c2_g1_i12	EDP08588	6.2e-110	2-cys peroxiredoxin, chloroplastic [Source:UniProtKB/TrEMBL;Acc:Q9FE86]	TRINITY_DN60807_c2_g1_i12	BAA10136	1.3e-94	thiol-specific antioxidant protein	TRINITY_DN60807_c2_g1_i12	ENSP00000361152.5	6.36e-77	peroxiredoxin 1 [Source:HGNC Symbol;Acc:HGNC:9352]	TRINITY_DN60807_c2_g1_i12	AAZ12966	9e-72	tryparedoxin peroxidase
TRINITY_DN60834_c1_g4	10318	11155	1.081	0.011795	10446	11254	1.077	0.032424	B	TRINITY_DN60834_c1_g4_i3	GAO45794.1	7.14e-11	hypothetical protein G7K_0045-t1 [Saitoella complicata NRRL Y-17804]	TRINITY_DN60834_c1_g4_i3	A3RCV9.1	3.44e-10	RecName: Full=Eukaryotic translation initiation factor NCBP; AltName: Full=Novel cap-binding protein; Short=nCBP; AltName: Full=mRNA cap-binding protein	TRINITY_DN60834_c1_g4_i3	AT5G18110.1	3.74e-08	Eukaryotic translation initiation factor NCBP [Source:UniProtKB/Swiss-Prot;Acc:Q9FK59]	TRINITY_DN60834_c1_g4_i3	EDP03261	3.33e-08	Eukaryotic initiation factor [Source:UniProtKB/TrEMBL;Acc:A8IXR5]					TRINITY_DN60834_c1_g4_i3	ENSP00000421287.1	1.46e-09	eukaryotic translation initiation factor 4E [Source:HGNC Symbol;Acc:HGNC:3287]
TRINITY_DN60881_c1_g1	1318	1466	1.111	0.00749574	1335	1479	1.108	0.0169502	B
TRINITY_DN60881_c1_g2	7726	8431	1.091	0.00345102	7821	8506	1.087	0.0116146	B	TRINITY_DN60881_c1_g2_i1	AAG38111.1	6.45e-145	porin-like protein [Euglena gracilis]
TRINITY_DN61006_c1_g1	2898	2692	-1.07643	0.0383139	2934	2716	-1.07991	0.0435313	B	TRINITY_DN61006_c1_g1_i3	CUI14431.1	3.6e-109	ADP-ribosylation factor, putative [Bodo saltans]	TRINITY_DN61006_c1_g1_i3	P61209.2	2.59e-106	RecName: Full=ADP-ribosylation factor 1	TRINITY_DN61006_c1_g1_i3	AT1G10630.1	1.02e-104	ADP-ribosylation factor A1F [Source:UniProtKB/TrEMBL;Acc:Q6ID97]	TRINITY_DN61006_c1_g1_i3	EDP05339	3.12e-105	Small ARF-related GTPase [Source:UniProtKB/TrEMBL;Acc:A8IL29]					TRINITY_DN61006_c1_g1_i3	ENSP00000440005.1	1.28e-105	ADP ribosylation factor 1 [Source:HGNC Symbol;Acc:HGNC:652]	TRINITY_DN61006_c1_g1_i3	EAN77256	5.7e-111	ADP-ribosylation factor, putative
TRINITY_DN61162_c5_g1	1052	1347	1.28	5.11889e-07	1065	1359	1.276	6.07323e-06	B
TRINITY_DN61173_c0_g1	212	262	1.24	0.00505941	214	265	1.235	0.000435608	B	TRINITY_DN61173_c0_g1_i4	XP_005648328.1	2.72e-14	galactose oxidase [Coccomyxa subellipsoidea C-169]	TRINITY_DN61173_c0_g1_i1	Q9MA55.1	1.11e-11	RecName: Full=Acyl-CoA-binding domain-containing protein 4; Short=Acyl-CoA binding protein 4	TRINITY_DN61173_c0_g1_i1	AT3G05420.1	1.32e-12	acyl-CoA binding protein 4 [Source:TAIR;Acc:AT3G05420]	TRINITY_DN61173_c0_g1_i4	EDP06806	3.14e-17	Predicted protein [Source:UniProtKB/TrEMBL;Acc:A8I9X5]					TRINITY_DN61173_c0_g1_i2	ENSP00000401591.2	4.65e-09	acyl-CoA binding domain containing 5 [Source:HGNC Symbol;Acc:HGNC:23338]	TRINITY_DN61173_c0_g1_i1	EAN79322	3.21e-16	hypothetical protein, conserved
TRINITY_DN61177_c0_g1	132	374	2.835	2.19313e-14	133	377	2.823	1.81571e-22	B	TRINITY_DN61177_c0_g1_i11	XP_002484510.1	7.88e-54	hypothetical protein TSTA_040370 [Talaromyces stipitatus ATCC 10500]	TRINITY_DN61177_c0_g1_i2	Q3E813.1	6.46e-09	RecName: Full=Uncharacterized protein YLR154C-G
TRINITY_DN61208_c0_g1	115	161	1.4	0.000970986	116	162	1.395	0.000103998	B
TRINITY_DN61214_c0_g2	1606	1845	1.149	2.17001e-05	1625	1861	1.145	0.000160552	B
TRINITY_DN61261_c1_g1	9079	10121	1.115	0.000431979	9189	10212	1.111	0.00201312	B	TRINITY_DN61261_c1_g1_i7	WP_076381377.1	5.13e-13	formate transporter [Filimonas lacunae]
TRINITY_DN61273_c0_g1	628	470	-1.3369	0.012129	636	475	-1.34048	0.000693249	B
TRINITY_DN61295_c1_g1	128	85	-1.50376	0.00173006	130	86	-1.51057	0.00105883	B
TRINITY_DN61304_c4_g1	3085	3767	1.221	7.36986e-22	3123	3800	1.217	4.17612e-15	B	TRINITY_DN61304_c4_g1_i3	OLP87259.1	2.83e-07	ELAV-like protein 1 [Symbiodinium microadriaticum]
TRINITY_DN61364_c1_g1	98	138	1.417	0.0281021	99	139	1.411	0.0259927	B
TRINITY_DN61386_c1_g2	276	342	1.242	0.017699	279	345	1.237	0.0194007	B	TRINITY_DN61386_c1_g2_i2	OLP78261.1	1.65e-10	putative ribosome biogenesis protein C8F11.04 [Symbiodinium microadriaticum]
TRINITY_DN61399_c1_g2	206	569	2.759	2.96841e-20	209	574	2.748	1.19762e-29	B	TRINITY_DN61399_c1_g2_i5	ELT94824.1	2.91e-46	hypothetical protein CAPTEDRAFT_122939, partial [Capitella teleta]									TRINITY_DN61399_c1_g2_i8	EDO95983	1.96e-10	Predicted protein [Source:UniProtKB/TrEMBL;Acc:A8JJG4]
TRINITY_DN61447_c1_g2	100	154	1.535	0.00438582	102	156	1.53	0.0049875	B
TRINITY_DN61465_c0_g1	6867	7503	1.093	0.00357182	6951	7570	1.089	0.0144332	B	TRINITY_DN61465_c0_g1_i1	AAR04016.1	0	cytosolic triosephosphate isomerase [Euglena gracilis]	TRINITY_DN61465_c0_g1_i7	P12863.3	1.27e-109	RecName: Full=Triosephosphate isomerase, cytosolic; Short=TIM; Short=Triose-phosphate isomerase	TRINITY_DN61465_c0_g1_i7	AT3G55440.1	5.38e-107	Triosephosphate isomerase, cytosolic [Source:UniProtKB/Swiss-Prot;Acc:P48491]	TRINITY_DN61465_c0_g1_i7	EDP09773	9.66e-87	Chloroplast triosephosphate isomerase [Source:UniProtKB/TrEMBL;Acc:Q5S7Y5]	TRINITY_DN61465_c0_g1_i5	BAA10145	2.72e-45	triosephosphate isomerase	TRINITY_DN61465_c0_g1_i7	ENSP00000484435.1	4.98e-98	triosephosphate isomerase 1 [Source:HGNC Symbol;Acc:HGNC:12009]	TRINITY_DN61465_c0_g1_i7	EAN79515	8.5e-77	triosephosphate isomerase
TRINITY_DN61537_c0_g3	1034	1280	1.238	1.06001e-10	1046	1291	1.233	4.50422e-09	B	TRINITY_DN61537_c0_g3_i2	XP_013897766.1	8.99e-139	Inorganic phosphate transporter 1-6 [Monoraphidium neglectum]	TRINITY_DN61537_c0_g3_i3	Q8GSD9.1	1.57e-106	RecName: Full=Inorganic phosphate transporter 1-2; Short=OsPT2; Short=OsPht1;2; AltName: Full=H(+)/Pi cotransporter; AltName: Full=OsPT1	TRINITY_DN61537_c0_g3_i2	AT5G43340.1	1.2e-102	Probable inorganic phosphate transporter 1-6 [Source:UniProtKB/Swiss-Prot;Acc:Q9ZWT3]	TRINITY_DN61537_c0_g3_i3	EDP04438	6.76e-41	Proton/phosphate symporter, splice variant b [Source:UniProtKB/TrEMBL;Acc:A8ISD6]	TRINITY_DN61537_c0_g3_i3	BAA10117	4.69e-07	glucose transport protein	TRINITY_DN61537_c0_g3_i2	ENSP00000479104.1	9.08e-15	SV2 related protein [Source:HGNC Symbol;Acc:HGNC:25417]
TRINITY_DN61537_c0_g4	5000	5799	1.16	1.73939e-10	5062	5850	1.156	6.39427e-08	B	TRINITY_DN61537_c0_g4_i2	XP_013897766.1	2.01e-86	Inorganic phosphate transporter 1-6 [Monoraphidium neglectum]	TRINITY_DN61537_c0_g4_i5	Q9ZWT3.1	3.58e-66	RecName: Full=Probable inorganic phosphate transporter 1-6; Short=AtPht1;6; AltName: Full=H(+)/Pi cotransporter	TRINITY_DN61537_c0_g4_i5	AT5G43340.1	4.23e-67	Probable inorganic phosphate transporter 1-6 [Source:UniProtKB/Swiss-Prot;Acc:Q9ZWT3]	TRINITY_DN61537_c0_g4_i5	EDP04438	4.07e-21	Proton/phosphate symporter, splice variant b [Source:UniProtKB/TrEMBL;Acc:A8ISD6]	TRINITY_DN61537_c0_g4_i2	BAA10117	3.46e-06	glucose transport protein	TRINITY_DN61537_c0_g4_i5	ENSP00000358141.1	3.99e-08	synaptic vesicle glycoprotein 2A [Source:HGNC Symbol;Acc:HGNC:20566]
TRINITY_DN61544_c0_g1	15	154	9.988	3.5585e-58	15	156	9.889	5.65405e-67	B	TRINITY_DN61544_c0_g1_i2	KWU42692.1	1.01e-66	mitochondrial cytochrome c oxidase subunit VIa [Rhodotorula sp. JG-1b]	TRINITY_DN61544_c0_g1_i2	P13182.3	2.85e-07	RecName: Full=Cytochrome c oxidase subunit 6A1, mitochondrial; AltName: Full=Cytochrome c oxidase polypeptide VIa-liver; AltName: Full=Cytochrome c oxidase subunit SSG; Flags: Precursor
TRINITY_DN61702_c7_g1	385	456	1.183	0.00474231	390	460	1.179	0.00462747	B
TRINITY_DN61719_c2_g4	2865	3170	1.106	5.01034e-05	2900	3198	1.103	0.00111829	B	TRINITY_DN61719_c2_g4_i7	XP_007515004.1	6.2e-28	F0F1 ATP synthase subunit delta [Bathycoccus prasinos]	TRINITY_DN61719_c2_g4_i4	P32980.1	1.02e-22	RecName: Full=ATP synthase delta chain, chloroplastic; AltName: Full=F-ATPase delta chain; Flags: Precursor	TRINITY_DN61719_c2_g4_i7	AT4G09650.1	3.76e-22	PDE332 [Source:UniProtKB/TrEMBL;Acc:A0A178V1L3]	TRINITY_DN61719_c2_g4_i3	EDP00272	4.65e-21	ATP synthase subunit b', chloroplastic [Source:UniProtKB/Swiss-Prot;Acc:A8J785]	TRINITY_DN61719_c2_g4_i3	BAA16738	5.01e-08	ATP synthase subunit b'
TRINITY_DN61732_c2_g1	10196	10957	1.075	0.00773609	10322	11054	1.071	0.0283576	B	TRINITY_DN61732_c2_g1_i3	BAQ25458.1	7.31e-124	malate dehydrogenase [Diplonema papillatum]	TRINITY_DN61732_c2_g1_i3	P37228.2	2.82e-110	RecName: Full=Malate dehydrogenase, glyoxysomal; Flags: Precursor	TRINITY_DN61732_c2_g1_i3	AT3G47520.1	4.78e-107	Malate dehydrogenase, chloroplastic [Source:UniProtKB/Swiss-Prot;Acc:Q9SN86]	TRINITY_DN61732_c2_g1_i3	EDP03144	1.98e-106	Malate dehydrogenase [Source:UniProtKB/TrEMBL;Acc:P93106]	TRINITY_DN61732_c2_g1_i3	BAA10470	1.63e-21	2-ketoacid dehydrogenase; malate dehydrogenase; lactate dehydrogenase	TRINITY_DN61732_c2_g1_i3	ENSP00000327070.5	4.44e-109	malate dehydrogenase 2 [Source:HGNC Symbol;Acc:HGNC:6971]	TRINITY_DN61732_c2_g1_i2	EAN77681	7.85e-99	mitochondrial malate dehydrogenase
TRINITY_DN61839_c3_g1	1383	1586	1.148	0.00044887	1400	1600	1.143	0.00288442	B
TRINITY_DN62005_c4_g1	427	514	1.202	0.00185227	432	518	1.198	0.00321573	B	TRINITY_DN62005_c4_g1_i13	XP_001031616.1	1.03e-27	MFS transporter [Tetrahymena thermophila SB210]	TRINITY_DN62005_c4_g1_i13	Q9UPI3.1	2.16e-22	RecName: Full=Feline leukemia virus subgroup C receptor-related protein 2; AltName: Full=Calcium-chelate transporter; Short=CCT													TRINITY_DN62005_c4_g1_i13	ENSP00000238667.4	4.73e-23	feline leukemia virus subgroup C cellular receptor family member 2 [Source:HGNC Symbol;Acc:HGNC:20105]
TRINITY_DN62034_c14_g1	175	226	1.293	0.00986984	177	228	1.288	0.00440135	B
TRINITY_DN62098_c3_g1	395	489	1.239	0.00238276	400	494	1.235	0.00503137	B
TRINITY_DN62123_c1_g2	332	392	1.177	0.0251515	336	395	1.173	0.0169473	B
TRINITY_DN62279_c3_g3	1618	1866	1.153	0.000238454	1638	1883	1.149	0.00158758	B
TRINITY_DN62321_c0_g1	1262	1430	1.133	0.000263449	1277	1443	1.13	0.00138297	B	TRINITY_DN62321_c0_g1_i2	KOO30748.1	0	glutamine catalytic domain protein [Chrysochromulina sp. CCMP291]	TRINITY_DN62321_c0_g1_i2	Q54WR9.1	8.41e-148	RecName: Full=Type-3 glutamine synthetase; AltName: Full=Type-3 glutamate--ammonia ligase; Short=Type-3 GS									TRINITY_DN62321_c0_g1_i2	BAA18510	3.58e-138	glutamate--ammonia ligase
TRINITY_DN62347_c2_g1	599	680	1.135	0.0158997	606	686	1.131	0.024109	B	TRINITY_DN62347_c2_g1_i7	XP_016979748.1	8.18e-08	PREDICTED: transformer-2 sex-determining protein isoform X6 [Drosophila rhopaloa]	TRINITY_DN62347_c2_g1_i7	P19018.1	1.46e-08	RecName: Full=Transformer-2 sex-determining protein	TRINITY_DN62347_c2_g1_i7	AT2G21440.1	9.64e-06	Expressed protein [Source:UniProtKB/TrEMBL;Acc:Q9SJT4]
TRINITY_DN62390_c0_g1	155	109	-1.42045	0.00177474	157	110	-1.4245	0.000604737	B
TRINITY_DN62392_c0_g1	499	2962	5.93	3.00635e-43	505	2988	5.915	1.79702e-78	B	TRINITY_DN62392_c0_g1_i5	XP_018246414.1	2.27e-33	50S ribosomal protein LP2 [Fusarium oxysporum f. sp. lycopersici 4287]	TRINITY_DN62392_c0_g1_i5	Q8TFM9.1	1.34e-29	RecName: Full=60S acidic ribosomal protein P2; AltName: Allergen=Fus c 1	TRINITY_DN62392_c0_g1_i1	AT5G24510.1	1.99e-17	60S acidic ribosomal family protein [Source:UniProtKB/TrEMBL;Acc:Q9FLV1]	TRINITY_DN62392_c0_g1_i1	EDO98531	1.58e-15	60S acidic ribosomal protein P1 [Source:UniProtKB/Swiss-Prot;Acc:P29763]					TRINITY_DN62392_c0_g1_i5	ENSP00000431240.1	7.16e-20	ribosomal protein lateral stalk subunit P2 [Source:HGNC Symbol;Acc:HGNC:10377]	TRINITY_DN62392_c0_g1_i5	AAZ12070	1.18e-12	60S acidic ribosomal protein P2, putative
TRINITY_DN62404_c3_g1	3558	4235	1.19	7.10595e-14	3602	4272	1.186	2.2677e-10	B	TRINITY_DN62404_c3_g1_i1	KZV34005.1	4.3e-37	heterogeneous nuclear ribonucleoprotein F [Dorcoceras hygrometricum]	TRINITY_DN62404_c3_g1_i1	Q8C5Q4.2	3.04e-33	RecName: Full=G-rich sequence factor 1; Short=GRSF-1; Flags: Precursor	TRINITY_DN62404_c3_g1_i1	AT5G66010.1	1.11e-26	RNA recognition motif-containing protein [Source:UniProtKB/TrEMBL;Acc:F4JZ11]	TRINITY_DN62404_c3_g1_i6	EDO98002	1.18e-26	RNA binding protein [Source:UniProtKB/TrEMBL;Acc:A8JDN6]					TRINITY_DN62404_c3_g1_i1	ENSP00000421789.1	5.6e-34	G-rich RNA sequence binding factor 1 [Source:HGNC Symbol;Acc:HGNC:4610]	TRINITY_DN62404_c3_g1_i1	AAQ15845	2.42e-20	heterogeneous nuclear ribonucleoprotein H/F, putative
TRINITY_DN62471_c0_g2	1599	1388	-1.1534	6.06708e-05	1619	1400	-1.15607	0.000177607	B
TRINITY_DN62471_c0_g4	694	584	-1.18906	9.91784e-05	703	589	-1.19332	0.000109812	B	TRINITY_DN62471_c0_g4_i1	OLB56480.1	6.07e-14	hypothetical protein AUI01_06465 [Ktedonobacter sp. 13_2_20CM_2_56_8]	TRINITY_DN62471_c0_g4_i2	Q0CLX3.1	7e-13	RecName: Full=Serine/threonine-protein kinase atg1; AltName: Full=Autophagy-related protein 1	TRINITY_DN62471_c0_g4_i2	AT5G18700.1	6.17e-09	Serine/threonine-protein kinase RUNKEL [Source:UniProtKB/Swiss-Prot;Acc:F4JY37]	TRINITY_DN62471_c0_g4_i1	EDP05715	1.7e-12	NimA-related protein kinase 8 [Source:UniProtKB/TrEMBL;Acc:A8IHF8]	TRINITY_DN62471_c0_g4_i1	BAA18552	1.98e-07	serine/threonine protein kinase	TRINITY_DN62471_c0_g4_i1	ENSP00000400312.2	1.72e-10	unc-51 like kinase 3 [Source:HGNC Symbol;Acc:HGNC:19703]	TRINITY_DN62471_c0_g4_i2	AAZ10363	1.91e-11	protein kinase, putative
TRINITY_DN62471_c1_g1	1096	964	-1.13766	0.0021143	1110	973	-1.14155	0.00306525	B	TRINITY_DN62471_c1_g1_i3	OLB56480.1	1.01e-08	hypothetical protein AUI01_06465 [Ktedonobacter sp. 13_2_20CM_2_56_8]	TRINITY_DN62471_c1_g1_i2	P51166.1	7.92e-07	RecName: Full=Cyclin-dependent-like kinase 5; AltName: Full=Cell division protein kinase 5; AltName: Full=Neuronal cyclin-dependent kinase 5	TRINITY_DN62471_c1_g1_i2	AT3G53930.2	1.39e-07	Protein kinase superfamily protein [Source:UniProtKB/TrEMBL;Acc:A8MR56]	TRINITY_DN62471_c1_g1_i9	EDP05715	1.1e-08	NimA-related protein kinase 8 [Source:UniProtKB/TrEMBL;Acc:A8IHF8]					TRINITY_DN62471_c1_g1_i2	ENSP00000419782.1	1.86e-07	cyclin dependent kinase 5 [Source:HGNC Symbol;Acc:HGNC:1774]	TRINITY_DN62471_c1_g1_i2	EAN78477	4.97e-06	protein kinase, putative
TRINITY_DN62471_c1_g2	409	343	-1.1919	0.048936	414	346	-1.19617	0.0448187	B
TRINITY_DN62502_c1_g1	283	356	1.257	0.000168144	287	360	1.253	1.49587e-05	B	TRINITY_DN62502_c1_g1_i4	XP_004356583.1	1.66e-24	gelation factor, putative [Acanthamoeba castellanii str. Neff]	TRINITY_DN62502_c1_g1_i4	P13466.1	2.67e-19	RecName: Full=Gelation factor; AltName: Full=Actin-binding protein 120; Short=ABP-120	TRINITY_DN62502_c1_g1_i7	AT2G37340.1	3.92e-09	Serine/arginine-rich splicing factor RS2Z33 [Source:UniProtKB/Swiss-Prot;Acc:Q8VYA5]	TRINITY_DN62502_c1_g1_i7	EDP09745	4.88e-09	SR protein factor [Source:UniProtKB/TrEMBL;Acc:A8HQ72]					TRINITY_DN62502_c1_g1_i4	ENSP00000327145.8	4.45e-15	filamin C [Source:HGNC Symbol;Acc:HGNC:3756]
TRINITY_DN62523_c1_g1	5224	5692	1.09	0.000325034	5289	5743	1.086	0.0047145	B	TRINITY_DN62523_c1_g1_i3	CAA65238.1	0	heat shock protein 60, partial [Euglena gracilis]	TRINITY_DN62523_c1_g1_i3	Q39727.1	0	RecName: Full=Chaperonin CPN60, mitochondrial; AltName: Full=HSP 60; Flags: Precursor	TRINITY_DN62523_c1_g1_i3	AT2G33210.1	0	Chaperonin CPN60-like 1, mitochondrial [Source:UniProtKB/Swiss-Prot;Acc:Q8L7B5]	TRINITY_DN62523_c1_g1_i4	EDP05086	0	Chaperonin 60C [Source:UniProtKB/TrEMBL;Acc:A8IMK1]	TRINITY_DN62523_c1_g1_i5	BAA17411	1.01e-165	60kD chaperonin 1	TRINITY_DN62523_c1_g1_i4	ENSP00000340019.2	0	heat shock protein family D (Hsp60) member 1 [Source:HGNC Symbol;Acc:HGNC:5261]	TRINITY_DN62523_c1_g1_i3	EAN78054	0	chaperonin Hsp60, mitochondrial precursor
TRINITY_DN62583_c3_g1	15011	9370	-1.60256	7.14911e-05	15207	9458	-1.60772	2.66287e-09	B	TRINITY_DN62583_c3_g1_i5	ABW06956.1	3.11e-71	chloroplast light-harvesting complex II protein precursor, partial [Euglena gracilis]	TRINITY_DN62583_c3_g1_i4	P14273.1	5.43e-34	RecName: Full=Chlorophyll a-b binding protein of LHCII type I, chloroplastic; Short=CAB; Short=LHCP; Flags: Precursor	TRINITY_DN62583_c3_g1_i5	AT1G29930.1	5e-30	Chlorophyll a-b binding protein 1, chloroplastic [Source:UniProtKB/Swiss-Prot;Acc:P04778]	TRINITY_DN62583_c3_g1_i4	EDP01602	2.61e-36	Chlorophyll a-b binding protein, chloroplastic [Source:UniProtKB/TrEMBL;Acc:A8J264]													Organelles, especially chloroplasts can act as a metal sink within the cell. An upregulation in these genes can account for more places for excess Hg to reside
TRINITY_DN62583_c3_g3	9591	6200	-1.5456	0.000987568	9716	6259	-1.5528	3.90505e-07	B	TRINITY_DN62583_c3_g3_i4	ABW06955.1	4.01e-106	chloroplast light-harvesting complex II protein precursor, partial [Euglena gracilis]	TRINITY_DN62583_c3_g3_i4	P12332.2	1.55e-59	RecName: Full=Chlorophyll a-b binding protein, chloroplastic; AltName: Full=LHCII type I CAB; Short=LHCP; Flags: Precursor	TRINITY_DN62583_c3_g3_i4	AT3G27690.2	2.63e-58	Photosystem II light harvesting complex protein 2.3 [Source:UniProtKB/TrEMBL;Acc:A0A1I9LMB4]	TRINITY_DN62583_c3_g3_i4	EDP02923	1.7e-62	Chlorophyll a-b binding protein, chloroplastic [Source:UniProtKB/TrEMBL;Acc:Q93WE0]
TRINITY_DN62583_c3_g4	1185	825	-1.43678	0.0133533	1200	833	-1.44092	0.000157831	B	TRINITY_DN62583_c3_g4_i1	ABW06955.1	4.42e-08	chloroplast light-harvesting complex II protein precursor, partial [Euglena gracilis]
TRINITY_DN62583_c5_g1	11677	6912	-1.68919	2.77973e-07	11834	6976	-1.69492	1.38619e-12	B	TRINITY_DN62583_c5_g1_i1	DAA05883.1	1.27e-25	TPA_inf: chloroplast light-harvesting complex II protein precursor Lhcbm4 [Euglena gracilis]	TRINITY_DN62583_c5_g1_i1	P09755.1	9.95e-13	RecName: Full=Chlorophyll a-b binding protein 2, chloroplastic; AltName: Full=LHCII type I CAB-2; Short=LHCP; Flags: Precursor	TRINITY_DN62583_c5_g1_i1	AT2G34430.1	3.02e-13	Chlorophyll a-b binding protein, chloroplastic [Source:UniProtKB/TrEMBL;Acc:Q39142]	TRINITY_DN62583_c5_g1_i1	EDP02923	2.35e-14	Chlorophyll a-b binding protein, chloroplastic [Source:UniProtKB/TrEMBL;Acc:Q93WE0]
TRINITY_DN62585_c0_g1	265	314	1.184	0.0335545	268	316	1.179	0.0108704	B	TRINITY_DN62585_c0_g1_i3	XP_009154865.1	4.49e-06	STIP1 and U-box containing protein 1 [Exophiala dermatitidis NIH/UT8656]
TRINITY_DN62617_c3_g1	214	165	-1.30378	0.00337185	217	166	-1.3089	0.000557368	B	TRINITY_DN62617_c3_g1_i1	CEG37587.1	5.24e-12	ste ste11 protein kinase [Plasmopara halstedii]	TRINITY_DN62617_c3_g1_i1	Q54B33.1	1.08e-09	RecName: Full=Serine/threonine-protein kinase pakE	TRINITY_DN62617_c3_g1_i1	AT3G15220.1	3.12e-09	MAP kinase [Source:UniProtKB/TrEMBL;Acc:Q9LDN6]	TRINITY_DN62617_c3_g1_i1	EDP07929	7.46e-09	Predicted protein [Source:UniProtKB/TrEMBL;Acc:A8I1H8]					TRINITY_DN62617_c3_g1_i1	ENSP00000345629.4	6.12e-10	mitogen-activated protein kinase kinase kinase 15 [Source:HGNC Symbol;Acc:HGNC:31689]	TRINITY_DN62617_c3_g1_i1	CAJ16132	4.27e-11	protein kinase, putative
TRINITY_DN62644_c8_g1	276	206	-1.34409	0.0108389	280	208	-1.34953	0.011541	B
TRINITY_DN62653_c2_g2	217	168	-1.29032	0.0149349	220	170	-1.29534	0.00644735	B
TRINITY_DN62682_c2_g1	595	523	-1.13766	0.0436764	602	527	-1.14155	0.0375885	B
TRINITY_DN62716_c2_g2	23345	25288	1.083	0.00133372	23633	25512	1.079	0.00500532	B	TRINITY_DN62716_c2_g2_i5	CAB51077.1	1.9e-84	cytochrome c6 precursor, partial [Euglena gracilis]	TRINITY_DN62716_c2_g2_i5	P00119.1	1.99e-58	RecName: Full=Cytochrome c6; AltName: Full=Cytochrome c-552; AltName: Full=Cytochrome c-553; AltName: Full=Cytochrome c553; AltName: Full=Soluble cytochrome f					TRINITY_DN62716_c2_g2_i5	EDO99527	8.27e-26	Cytochrome c6, chloroplastic [Source:UniProtKB/Swiss-Prot;Acc:P08197]	TRINITY_DN62716_c2_g2_i5	BAA17354	1.25e-11	cytochrome c553
TRINITY_DN62758_c11_g1	650	776	1.194	0.0203718	659	783	1.189	0.0415955	B
TRINITY_DN62770_c8_g1	2745	2960	1.078	0.0149527	2779	2986	1.074	0.0425044	B
TRINITY_DN62782_c4_g3	3382	3661	1.082	0.0165589	3423	3693	1.079	0.0424467	B
TRINITY_DN62858_c8_g1	14516	15617	1.076	0.00157915	14696	15756	1.072	0.0144332	B	TRINITY_DN62858_c8_g1_i2	P00076.1	2.16e-69	RecName: Full=Cytochrome c	TRINITY_DN62858_c8_g1_i2	P00076.1	7.63e-72	RecName: Full=Cytochrome c	TRINITY_DN62858_c8_g1_i2	AT4G10040.1	3.56e-36	CYTC-2 [Source:UniProtKB/TrEMBL;Acc:A0A178UZN3]	TRINITY_DN62858_c8_g1_i2	EDP00604	6.77e-36	Cytochrome c [Source:UniProtKB/Swiss-Prot;Acc:P15451]	TRINITY_DN62858_c8_g1_i2	BAA18172	5.66e-07	cytochrome; CytM	TRINITY_DN62858_c8_g1_i2	ENSP00000416479.1	8.7e-40	cytochrome c, somatic [Source:HGNC Symbol;Acc:HGNC:19986]	TRINITY_DN62858_c8_g1_i2	AAZ13276	8.02e-41	cytochrome c
TRINITY_DN62879_c6_g1	2477	2736	1.105	0.0215881	2508	2760	1.1	0.0497927	B
TRINITY_DN62893_c2_g2	3052	3403	1.115	0.000163809	3090	3433	1.111	0.00165352	B
TRINITY_DN62982_c0_g1	20089	21810	1.086	0.0016691	20336	22004	1.082	0.00530635	B	TRINITY_DN62982_c0_g1_i9	KXZ43843.1	7.69e-25	hypothetical protein GPECTOR_79g122 [Gonium pectorale]	TRINITY_DN62982_c0_g1_i9	Q41643.1	6.84e-27	RecName: Full=Oxygen-evolving enhancer protein 3, chloroplastic; Short=OEE3; Flags: Precursor	TRINITY_DN62982_c0_g1_i2	AT4G21280.1	1.01e-09	Oxygen-evolving enhancer protein 3-1, chloroplastic [Source:UniProtKB/Swiss-Prot;Acc:Q9XFT3]	TRINITY_DN62982_c0_g1_i9	EDO97626	1.24e-27	Oxygen-evolving enhancer protein 3, chloroplastic [Source:UniProtKB/Swiss-Prot;Acc:P12852]
TRINITY_DN63048_c1_g1	159	97	-1.65289	3.40589e-06	162	97	-1.65837	1.4757e-06	B	TRINITY_DN63048_c1_g1_i1	XP_005840195.1	3.19e-24	hypothetical protein GUITHDRAFT_100925 [Guillardia theta CCMP2712]	TRINITY_DN63048_c1_g1_i1	A6ZU08.1	8.94e-15	RecName: Full=Serine/threonine-protein kinase TOS3; AltName: Full=Target of SBF protein 3	TRINITY_DN63048_c1_g1_i1	AT5G60550.1	6.52e-13	Serine/threonine-protein kinase GRIK2 [Source:UniProtKB/Swiss-Prot;Acc:Q5HZ38]	TRINITY_DN63048_c1_g1_i4	EDO99748	2.34e-12	Mitogen-activated protein kinase 7 [Source:UniProtKB/TrEMBL;Acc:A8J8P5]	TRINITY_DN63048_c1_g1_i15	BAA18552	8.35e-08	serine/threonine protein kinase	TRINITY_DN63048_c1_g1_i4	ENSP00000388273.2	5.36e-14	calcium/calmodulin dependent protein kinase kinase 2 [Source:HGNC Symbol;Acc:HGNC:1470]	TRINITY_DN63048_c1_g1_i14	EAN78798	5.74e-12	protein kinase, putative
TRINITY_DN63058_c0_g1	9661	10427	1.079	0.013697	9781	10518	1.075	0.0371384	B	TRINITY_DN63058_c0_g1_i4	PBJ68315.1	1.08e-48	ribonucleoprotein p18, mitochondrial precursor [Trypanosoma cruzi cruzi]	TRINITY_DN63058_c0_g1_i4	Q25423.1	5.15e-50	RecName: Full=Protein P18, mitochondrial; Flags: Precursor																	TRINITY_DN63058_c0_g1_i4	AAZ11286	2.17e-48	ribonucleoprotein p18, mitochondrial precursor, putative
TRINITY_DN63072_c1_g1	2191	2390	1.091	0.00345028	2218	2411	1.087	0.0224504	B	TRINITY_DN63072_c1_g1_i4	CUG93165.1	6.78e-52	RNA-binding protein, putative [Bodo saltans]	TRINITY_DN63072_c1_g1_i8	Q6ICX4.1	2.11e-38	RecName: Full=Polypyrimidine tract-binding protein homolog 3	TRINITY_DN63072_c1_g1_i8	AT1G43190.2	2.49e-39	Polypyrimidine tract-binding protein homolog 3 [Source:UniProtKB/Swiss-Prot;Acc:Q6ICX4]									TRINITY_DN63072_c1_g1_i8	ENSP00000363375.1	4.98e-25	polypyrimidine tract binding protein 3 [Source:HGNC Symbol;Acc:HGNC:10253]	TRINITY_DN63072_c1_g1_i8	EAN76868	7.61e-53	RNA-binding protein, putative
TRINITY_DN63075_c1_g2	109	80	-1.35685	0.0301318	110	81	-1.36054	0.0099456	B	TRINITY_DN63075_c1_g2_i2	XP_002185290.1	2.63e-23	glutaredoxin [Phaeodactylum tricornutum CCAP 1055/1]	TRINITY_DN63075_c1_g2_i2	Q6H628.1	5.9e-20	RecName: Full=Monothiol glutaredoxin-S6	TRINITY_DN63075_c1_g2_i2	AT1G77370.1	8.72e-21	Glutaredoxin family protein [Source:TAIR;Acc:AT1G77370]	TRINITY_DN63075_c1_g2_i2	EDP02937	3.32e-13	Glutaredoxin, CPYC type [Source:UniProtKB/TrEMBL;Acc:A8IYH1]	TRINITY_DN63075_c1_g2_i2	BAA17532	6.9e-07	glutaredoxin 3	TRINITY_DN63075_c1_g2_i2	ENSP00000429584.2	2.17e-16	thioredoxin reductase 3 [Source:HGNC Symbol;Acc:HGNC:20667]	TRINITY_DN63075_c1_g2_i2	CAJ16191	2.06e-13	glutaredoxin, putative
TRINITY_DN63077_c0_g3	312	211	-1.48148	1.51634e-06	316	213	-1.4881	3.01315e-06	B
TRINITY_DN63087_c1_g1	419	314	-1.33333	0.00026694	424	317	-1.33869	0.000617763	B
TRINITY_DN63123_c1_g2	497	424	-1.17233	0.0368747	504	428	-1.17647	0.0429696	B
TRINITY_DN63130_c2_g2	196	156	-1.25156	0.0458923	198	158	-1.25471	0.0160346	B	TRINITY_DN63130_c2_g2_i7	WP_094576094.1	8.21e-57	sel1 repeat family protein [Kingella denitrificans]	TRINITY_DN63130_c2_g2_i7	A0A0H2VDN9.1	7.57e-31	RecName: Full=Secretory immunoglobulin A-binding protein EsiB; Flags: Precursor	TRINITY_DN63130_c2_g2_i12	AT1G70590.1	1.88e-18	F-box protein At1g70590 [Source:UniProtKB/Swiss-Prot;Acc:Q94C27]	TRINITY_DN63130_c2_g2_i7	EDP03170	1.58e-13	Sel-1 like protein [Source:UniProtKB/TrEMBL;Acc:A8IWV3]					TRINITY_DN63130_c2_g2_i12	ENSP00000337053.4	6.95e-15	SEL1L ERAD E3 ligase adaptor subunit [Source:HGNC Symbol;Acc:HGNC:10717]	TRINITY_DN63130_c2_g2_i12	AAZ12837	9.51e-12	hypothetical protein, conserved
TRINITY_DN63176_c4_g1	508	414	-1.22699	5.60052e-05	515	418	-1.23153	2.39195e-05	B	TRINITY_DN63176_c4_g1_i2	ETM02007.1	1.64e-33	hypothetical protein L917_01464 [Phytophthora parasitica]	TRINITY_DN63176_c4_g1_i2	Q7FMW4.1	7.34e-27	RecName: Full=ABC transporter G family member 38; Short=OsABCG38; AltName: Full=Pleiotropic drug resistance protein 15; Short=OsPDR15	TRINITY_DN63176_c4_g1_i3	AT3G30842.1	7.87e-27	ABC transporter G family member 38 [Source:UniProtKB/Swiss-Prot;Acc:Q7PC85]	TRINITY_DN63176_c4_g1_i4	EDP04257	3.45e-28	PDR-like ABC transporter [Source:UniProtKB/TrEMBL;Acc:A8IT38]	TRINITY_DN63176_c4_g1_i2	BAA10398	4.22e-11	high-affinity branched-chain amino acid transport ATP-binding protein	TRINITY_DN63176_c4_g1_i3	ENSP00000381467.3	1.53e-15	ATP binding cassette subfamily G member 1 [Source:HGNC Symbol;Acc:HGNC:73]	TRINITY_DN63176_c4_g1_i2	EAN78143	4.8e-11	ATP-binding cassette protein, putative
TRINITY_DN63181_c4_g1	692	384	-1.8018	0.000913884	702	388	-1.80832	5.89795e-07	B
TRINITY_DN63206_c1_g2	312	261	-1.19617	0.0386266	316	264	-1.20048	0.0153398	B					TRINITY_DN63206_c1_g2_i12	Q2QTY2.1	1.56e-06	RecName: Full=Zinc finger CCCH domain-containing protein 65; Short=OsC3H65	TRINITY_DN63206_c1_g2_i18	AT3G12680.1	1.26e-06	HUA1 [Source:UniProtKB/TrEMBL;Acc:A0A178VA41]
TRINITY_DN63226_c3_g1	157	207	1.317	0.0118015	159	209	1.313	0.00621567	B
TRINITY_DN63376_c7_g1	8736	9411	1.077	0.00353075	8843	9494	1.074	0.0162928	B	TRINITY_DN63376_c7_g1_i2	GAX85882.1	5.9e-23	hypothetical protein CEUSTIGMA_g13298.t1 [Chlamydomonas eustigma]	TRINITY_DN63376_c7_g1_i2	P53991.1	7.63e-23	RecName: Full=Ferredoxin--NADP reductase, chloroplastic; Short=FNR; Flags: Precursor	TRINITY_DN63376_c7_g1_i2	AT4G05390.1	3.01e-15	Ferredoxin--NADP reductase, root isozyme 1, chloroplastic [Source:UniProtKB/Swiss-Prot;Acc:Q9M0V6]	TRINITY_DN63376_c7_g1_i4	EDP00292	2.96e-24	Ferredoxin--NADP reductase [Source:UniProtKB/TrEMBL;Acc:A8J6Y8]
TRINITY_DN63376_c7_g3	14888	16281	1.094	0.000375206	15070	16425	1.09	0.00198922	B	TRINITY_DN63376_c7_g3_i2	DAA05880.1	4.17e-138	TPA_inf: chloroplast light-harvesting protein CP29 precursor Lhcb4 [Euglena gracilis]	TRINITY_DN63376_c7_g3_i2	Q9S7W1.1	3.7e-68	RecName: Full=Chlorophyll a-b binding protein CP29.3, chloroplastic; AltName: Full=LHCB4.3; AltName: Full=LHCII protein 4.3; Flags: Precursor	TRINITY_DN63376_c7_g3_i2	AT2G40100.1	4.38e-69	Chlorophyll a-b binding protein, chloroplastic [Source:UniProtKB/TrEMBL;Acc:A0A178VTY4]	TRINITY_DN63376_c7_g3_i2	EDP00448	8.21e-68	Chlorophyll a-b binding protein, chloroplastic [Source:UniProtKB/TrEMBL;Acc:A8J6D1]
TRINITY_DN63406_c0_g2	3891	4272	1.098	0.000344487	3939	4310	1.094	0.00410859	B	TRINITY_DN63406_c0_g2_i8	AMM43139.1	0	ribulose-1,5-bisphosphate carboxylase/oxygenase activase [Euglena longa]	TRINITY_DN63406_c0_g2_i8	P23489.1	9.15e-143	RecName: Full=Ribulose bisphosphate carboxylase/oxygenase activase, chloroplastic; Short=RA; Short=RuBisCO activase; Flags: Precursor	TRINITY_DN63406_c0_g2_i8	AT2G39730.3	9.74e-137	Ribulose bisphosphate carboxylase/oxygenase activase, chloroplastic [Source:UniProtKB/Swiss-Prot;Acc:P10896]	TRINITY_DN63406_c0_g2_i8	EDP04194	1.59e-144	Rubisco activase [Source:UniProtKB/TrEMBL;Acc:Q6SA05]
TRINITY_DN63470_c2_g5	3992	4388	1.099	0.000489557	4042	4427	1.095	0.00600161	B
TRINITY_DN63514_c4_g1	257	384	1.496	1.74032e-11	260	387	1.49	2.42211e-11	B
TRINITY_DN63584_c2_g1	10090	10972	1.087	0.00300219	10215	11070	1.084	0.0137976	B	TRINITY_DN63584_c2_g1_i1	XP_021363750.1	8.66e-47	peptidyl-prolyl cis-trans isomerase [Mizuhopecten yessoensis]	TRINITY_DN63584_c2_g1_i1	P25007.2	2.68e-46	RecName: Full=Peptidyl-prolyl cis-trans isomerase; Short=PPIase; AltName: Full=Cyclophilin; AltName: Full=Cyclosporin A-binding protein; AltName: Full=Rotamase	TRINITY_DN63584_c2_g1_i1	AT4G38740.1	3.24e-36	Peptidyl-prolyl cis-trans isomerase [Source:UniProtKB/TrEMBL;Acc:A0A178V2S8]	TRINITY_DN63584_c2_g1_i1	EDO98214	2.01e-40	Peptidyl-prolyl cis-trans isomerase [Source:UniProtKB/TrEMBL;Acc:A8JD64]	TRINITY_DN63584_c2_g1_i1	BAA17841	7.03e-33	peptidyl-prolyl cis-trans isomerase	TRINITY_DN63584_c2_g1_i1	ENSP00000396388.1	8.61e-43	peptidylprolyl isomerase F [Source:HGNC Symbol;Acc:HGNC:9259]	TRINITY_DN63584_c2_g1_i1	EAN79069	6.26e-41	cyclophilin a
TRINITY_DN63584_c2_g3	6691	7501	1.121	1.04891e-05	6774	7567	1.117	0.000196429	B	TRINITY_DN63584_c2_g3_i1	AAR11779.1	9.3e-42	cyclophilin A [Azumapecten farreri]	TRINITY_DN63584_c2_g3_i1	Q99KR7.1	3.73e-38	RecName: Full=Peptidyl-prolyl cis-trans isomerase F, mitochondrial; Short=PPIase F; AltName: Full=Cyclophilin D; Short=CyP-D; Short=CypD; AltName: Full=Cyclophilin F; AltName: Full=Rotamase F; Flags: Precursor	TRINITY_DN63584_c2_g3_i1	AT4G38740.1	6.71e-36	Peptidyl-prolyl cis-trans isomerase [Source:UniProtKB/TrEMBL;Acc:A0A178V2S8]	TRINITY_DN63584_c2_g3_i1	EDO98214	5.04e-39	Peptidyl-prolyl cis-trans isomerase [Source:UniProtKB/TrEMBL;Acc:A8JD64]	TRINITY_DN63584_c2_g3_i1	BAA17841	7.68e-31	peptidyl-prolyl cis-trans isomerase	TRINITY_DN63584_c2_g3_i1	ENSP00000225174.3	1.58e-38	peptidylprolyl isomerase F [Source:HGNC Symbol;Acc:HGNC:9259]	TRINITY_DN63584_c2_g3_i1	AAZ12967	1.32e-32	cyclophilin type peptidyl-prolyl cis-trans isomerase, putative
TRINITY_DN63616_c0_g1	32968	36502	1.107	0.00355095	33377	36824	1.103	0.00654336	B
TRINITY_DN63645_c2_g1	164	127	-1.28866	0.0235415	166	128	-1.29199	0.00466017	B	TRINITY_DN63645_c2_g1_i3	XP_005786304.1	8.07e-06	putative membrane protein [Emiliania huxleyi CCMP1516]
TRINITY_DN63647_c3_g2	16151	17374	1.076	0.00252832	16352	17528	1.072	0.014304	B	TRINITY_DN63647_c3_g2_i1	AAX48884.1	1.16e-22	S8 [Suberites domuncula]	TRINITY_DN63647_c3_g2_i1	O76756.2	1.99e-21	RecName: Full=40S ribosomal protein S8	TRINITY_DN63647_c3_g2_i1	AT5G20290.1	2.93e-22	40S ribosomal protein S8 [Source:UniProtKB/TrEMBL;Acc:A0A178UCD3]	TRINITY_DN63647_c3_g2_i1	EDP08178	1.69e-22	40S ribosomal protein S8 [Source:UniProtKB/TrEMBL;Acc:A8HVQ1]					TRINITY_DN63647_c3_g2_i1	ENSP00000379888.3	2.54e-20	ribosomal protein S8 [Source:HGNC Symbol;Acc:HGNC:10441]	TRINITY_DN63647_c3_g2_i1	AAZ13379	3.68e-20	40S ribosomal protein S8, putative
TRINITY_DN63666_c0_g1	363	213	-1.7094	2.826e-10	368	215	-1.71233	6.29109e-09	B	TRINITY_DN63666_c0_g1_i4	SCO66416.1	1.37e-29	subpellicular microtubule protein 1, putative [Plasmodium vivax]									TRINITY_DN63666_c0_g1_i10	EDP00487	8.53e-10	Flagellar associated protein [Source:UniProtKB/TrEMBL;Acc:A8J6L0]
TRINITY_DN63827_c0_g1	258	203	-1.26582	0.00572335	261	205	-1.27065	0.00139315	B	TRINITY_DN63827_c0_g1_i2	EWM26327.1	9.2e-56	multidrug resistance-associated protein 4 [Nannochloropsis gaditana]	TRINITY_DN63827_c0_g1_i2	O15439.3	4.02e-49	RecName: Full=Multidrug resistance-associated protein 4; AltName: Full=ATP-binding cassette sub-family C member 4; AltName: Full=MRP/cMOAT-related ABC transporter; AltName: Full=Multi-specific organic anion transporter B; Short=MOAT-B	TRINITY_DN63827_c0_g1_i2	AT2G47800.1	1.51e-30	ABC transporter C family member 4 [Source:UniProtKB/Swiss-Prot;Acc:Q7DM58]	TRINITY_DN63827_c0_g1_i3	EDP08676	1.8e-39	ABC transporter, multidrug resistance associated protein [Source:UniProtKB/TrEMBL;Acc:A8HRK2]					TRINITY_DN63827_c0_g1_i2	ENSP00000366084.4	8.8e-50	ATP binding cassette subfamily C member 4 [Source:HGNC Symbol;Acc:HGNC:55]	TRINITY_DN63827_c0_g1_i5	AAZ12983	1.6e-28	multidrug resistance protein A
TRINITY_DN63843_c12_g2	99	133	1.335	0.0137182	100	134	1.329	0.0021604	B
TRINITY_DN63851_c0_g1	689	593	-1.16279	0.00172065	698	598	-1.16686	0.00203674	B
TRINITY_DN63930_c0_g1	275	226	-1.21507	0.0341144	278	228	-1.21951	0.0158711	B	TRINITY_DN63930_c0_g1_i2	OWW21122.1	1.46e-15	hypothetical protein AYR66_18235 [Noviherbaspirillum denitrificans]
TRINITY_DN63931_c0_g1	116	73	-1.57729	0.000795209	117	74	-1.58479	0.000571919	B	TRINITY_DN63931_c0_g1_i2	SCY52880.1	1.3e-10	two-component system, NarL family, sensor histidine kinase EvgS [Desulfoluna spongiiphila]	TRINITY_DN63931_c0_g1_i2	P10955.2	8.66e-10	RecName: Full=Sensor protein FixL					TRINITY_DN63931_c0_g1_i2	EDP09119	1.28e-10	Predicted protein [Source:UniProtKB/TrEMBL;Acc:A8HUM2]
TRINITY_DN63988_c4_g1	82	117	1.429	0.0296808	83	118	1.424	0.0226796	B	TRINITY_DN63988_c4_g1_i5	KYQ60121.1	1.03e-11	Gag-Pro-Pol polyprotein, partial [Trachymyrmex zeteki]	TRINITY_DN63988_c4_g1_i10	P32542.1	9.57e-07	RecName: Full=Pol polyprotein; Contains: RecName: Full=Protease; AltName: Full=Retropepsin; Contains: RecName: Full=Reverse transcriptase/ribonuclease H; Short=RT; AltName: Full=Exoribonuclease H; Contains: RecName: Full=Integrase; Short=IN
TRINITY_DN64004_c11_g1	74	122	1.643	0.00986278	75	123	1.639	0.0123882	B
TRINITY_DN64126_c0_g2	97	64	-1.51515	0.00227204	98	64	-1.51976	0.000497992	B	TRINITY_DN64126_c0_g2_i6	ESL06236.1	3.43e-24	protein kinase [Trypanosoma rangeli SC58]	TRINITY_DN64126_c0_g2_i6	Q8BW96.2	2.38e-20	RecName: Full=Calcium/calmodulin-dependent protein kinase type 1D; AltName: Full=CaM kinase I delta; Short=CaM-KI delta; Short=CaMKI delta; AltName: Full=CaM kinase ID; AltName: Full=CaMKI-like protein kinase; Short=CKLiK; Short=mCKLiK	TRINITY_DN64126_c0_g2_i6	AT3G50530.2	1.16e-18	CDPK-related kinase [Source:TAIR;Acc:AT3G50530]	TRINITY_DN64126_c0_g2_i6	EDP04678	6.72e-20	Calcium-dependent protein kinase 1 [Source:UniProtKB/TrEMBL;Acc:A8IPQ9]	TRINITY_DN64126_c0_g2_i9	BAA10726	9.68e-06	eukaryotic protein kinase	TRINITY_DN64126_c0_g2_i6	ENSP00000478861.1	2.64e-21	calcium/calmodulin dependent protein kinase ID [Source:HGNC Symbol;Acc:HGNC:19341]	TRINITY_DN64126_c0_g2_i6	AAZ11554	1.15e-25	protein kinase, putative
TRINITY_DN64146_c5_g2	377	314	-1.20192	0.0298139	382	316	-1.20627	0.0221039	B
TRINITY_DN64164_c0_g1	733	468	-1.56495	0.0159269	743	472	-1.57233	0.000102541	B
TRINITY_DN64167_c2_g2	212	264	1.248	0.0267066	215	266	1.243	0.0207136	B
TRINITY_DN64182_c6_g1	11620	12611	1.085	0.0137445	11762	12723	1.082	0.0297188	B	TRINITY_DN64182_c6_g1_i5	AAC37245.1	9.9e-50	glyceraldehyde-3-phosphate dehydrogenase [Euglena gracilis]	TRINITY_DN64182_c6_g1_i5	O96423.3	2.88e-41	RecName: Full=Glyceraldehyde-3-phosphate dehydrogenase, glycosomal; Short=GAPDH	TRINITY_DN64182_c6_g1_i5	AT1G79530.1	2.93e-23	Glyceraldehyde-3-phosphate dehydrogenase GAPCP1, chloroplastic [Source:UniProtKB/Swiss-Prot;Acc:Q9SAJ6]	TRINITY_DN64182_c6_g1_i5	EDO97261	1.07e-18	Glyceraldehyde 3-phosphate dehydrogenase [Source:UniProtKB/TrEMBL;Acc:A8JFT3]	TRINITY_DN64182_c6_g1_i5	BAA17609	9.95e-21	glyceraldehyde 3-phosphate dehydrogenase	TRINITY_DN64182_c6_g1_i5	ENSP00000380065.1	1.44e-19	glyceraldehyde-3-phosphate dehydrogenase [Source:HGNC Symbol;Acc:HGNC:4141]	TRINITY_DN64182_c6_g1_i5	AAZ11988	4.4e-40	glyceraldehyde 3-phosphate dehydrogenase, glycosomal
TRINITY_DN64182_c6_g3	21848	23398	1.071	0.0293218	22116	23605	1.067	0.0464647	B	TRINITY_DN64182_c6_g3_i2	AMN16514.1	5.51e-90	glyceraldehyde-3-phosphate dehydrogenase, partial [Euglena agilis]	TRINITY_DN64182_c6_g3_i2	Q27890.3	1.19e-60	RecName: Full=Glyceraldehyde-3-phosphate dehydrogenase, glycosomal; Short=GAPDH	TRINITY_DN64182_c6_g3_i2	AT1G13440.1	2.88e-41	Glyceraldehyde-3-phosphate dehydrogenase GAPC2, cytosolic [Source:UniProtKB/Swiss-Prot;Acc:Q9FX54]	TRINITY_DN64182_c6_g3_i2	EDP09609	5.7e-33	Glyceraldehyde-3-phosphate dehydrogenase [Source:UniProtKB/TrEMBL;Acc:A8HP84]	TRINITY_DN64182_c6_g3_i2	BAA17609	5.58e-40	glyceraldehyde 3-phosphate dehydrogenase	TRINITY_DN64182_c6_g3_i2	ENSP00000478864.1	4.04e-38	glyceraldehyde-3-phosphate dehydrogenase [Source:HGNC Symbol;Acc:HGNC:4141]	TRINITY_DN64182_c6_g3_i2	AAZ11988	5.43e-61	glyceraldehyde 3-phosphate dehydrogenase, glycosomal
TRINITY_DN64182_c6_g5	9145	10171	1.112	0.000350315	9257	10262	1.108	0.00216011	B	TRINITY_DN64182_c6_g5_i1	AAC37245.1	4.52e-39	glyceraldehyde-3-phosphate dehydrogenase [Euglena gracilis]	TRINITY_DN64182_c6_g5_i1	P22512.3	2.91e-31	RecName: Full=Glyceraldehyde-3-phosphate dehydrogenase, glycosomal; Short=GAPDH	TRINITY_DN64182_c6_g5_i1	AT1G79530.1	8.32e-12	Glyceraldehyde-3-phosphate dehydrogenase GAPCP1, chloroplastic [Source:UniProtKB/Swiss-Prot;Acc:Q9SAJ6]	TRINITY_DN64182_c6_g5_i1	EDO96575	9.26e-12	Glyceraldehyde-3-phosphate dehydrogenase [Source:UniProtKB/TrEMBL;Acc:A8JHR9]	TRINITY_DN64182_c6_g5_i1	BAA17609	1.5e-08	glyceraldehyde 3-phosphate dehydrogenase	TRINITY_DN64182_c6_g5_i1	ENSP00000222286.3	2.79e-11	glyceraldehyde-3-phosphate dehydrogenase, spermatogenic [Source:HGNC Symbol;Acc:HGNC:24864]	TRINITY_DN64182_c6_g5_i1	AAZ11988	1.55e-32	glyceraldehyde 3-phosphate dehydrogenase, glycosomal
TRINITY_DN64191_c9_g1	8164	8785	1.076	0.00663083	8264	8863	1.072	0.0263086	B	TRINITY_DN64191_c9_g1_i3	XP_005534862.1	6.96e-78	40S ribosomal protein S9 [Cyanidioschyzon merolae strain 10D]	TRINITY_DN64191_c9_g1_i3	P17959.1	8.4e-77	RecName: Full=Probable 40S ribosomal protein S9	TRINITY_DN64191_c9_g1_i3	AT5G39850.1	1.6e-75	40S ribosomal protein S9-2 [Source:UniProtKB/Swiss-Prot;Acc:Q9FLF0]	TRINITY_DN64191_c9_g1_i3	EDO97033	1.56e-74	Ribosomal protein S9, component of cytosolic 80S ribosome and 40S small subunit [Source:UniProtKB/TrEMBL;Acc:A8JGF8]					TRINITY_DN64191_c9_g1_i3	ENSP00000482475.1	6.31e-69	ribosomal protein S9 [Source:HGNC Symbol;Acc:HGNC:10442]	TRINITY_DN64191_c9_g1_i3	AAZ12882	2.09e-78	40S ribosomal protein S9, putative
TRINITY_DN64222_c7_g1	1783	2370	1.328	1.38019e-15	1805	2391	1.324	6.5485e-13	B
TRINITY_DN64230_c1_g1	568	492	-1.15607	0.00784921	575	496	-1.16009	0.0052732	B	TRINITY_DN64230_c1_g1_i2	OYX55056.1	1.3e-13	hypothetical protein B7Y86_14725 [Brevundimonas subvibrioides]	TRINITY_DN64230_c1_g1_i2	Q8S9F1.1	2.51e-10	RecName: Full=Photoactivated adenylate cyclase subunit beta; AltName: Full=Photoactivated adenylyl cyclase subunit beta									TRINITY_DN64230_c1_g1_i2	BAA18389	1.83e-06	activator of photopigment and puc expression
TRINITY_DN64233_c0_g2	521	622	1.194	0.0113524	528	628	1.19	0.0232551	B	TRINITY_DN64233_c0_g2_i2	OLP86687.1	4.12e-18	Elongation factor 2 [Symbiodinium microadriaticum]	TRINITY_DN64233_c0_g2_i3	Q9SQN2.1	3.69e-07	RecName: Full=Probable folate-biopterin transporter 3	TRINITY_DN64233_c0_g2_i2	AT1G79710.3	2.76e-08	Probable folate-biopterin transporter 3 [Source:UniProtKB/Swiss-Prot;Acc:Q9SQN2]	TRINITY_DN64233_c0_g2_i3	EDP05069	1.13e-06	Folate transporter [Source:UniProtKB/TrEMBL;Acc:A8IM62]
TRINITY_DN64273_c3_g2	121	86	-1.41643	0.00384251	123	87	-1.42248	0.000435608	B
TRINITY_DN64282_c3_g1	25244	27442	1.087	0.00263257	25555	27686	1.083	0.00771819	B
TRINITY_DN64282_c3_g2	20898	22376	1.071	0.0097768	21156	22574	1.067	0.0243193	B	TRINITY_DN64282_c3_g2_i3	CAA44291.1	4.12e-10	23-dDa polypeptide of Photosystem II oxygen-evolving complex, partial [Nicotiana tabacum]	TRINITY_DN64282_c3_g2_i3	P29795.1	1.65e-12	RecName: Full=Oxygen-evolving enhancer protein 2, chloroplastic; Short=OEE2; AltName: Full=23 kDa subunit of oxygen evolving system of photosystem II; AltName: Full=23 kDa thylakoid membrane protein; AltName: Full=OEC 23 kDa subunit; Flags: Precursor	TRINITY_DN64282_c3_g2_i3	AT1G06680.2	5.61e-12	Oxygen-evolving enhancer protein 2-1, chloroplastic [Source:UniProtKB/Swiss-Prot;Acc:Q42029]	TRINITY_DN64282_c3_g2_i3	EDP03062	6.19e-11	Oxygen-evolving enhancer protein 2 of photosystem II [Source:UniProtKB/TrEMBL;Acc:A8IYH9]
TRINITY_DN64282_c3_g3	20737	22712	1.095	1.11574e-05	20995	22913	1.091	0.000319741	B	TRINITY_DN64282_c3_g3_i3	GAQ85520.1	2e-29	photosystem II oxygen-evolving enhancer protein II-1 [Klebsormidium nitens]	TRINITY_DN64282_c3_g3_i3	Q9SLQ8.1	1.3e-25	RecName: Full=Oxygen-evolving enhancer protein 2, chloroplastic; Short=OEE2; AltName: Full=23 kDa subunit of oxygen evolving system of photosystem II; AltName: Full=23 kDa thylakoid membrane protein; AltName: Full=OEC 23 kDa subunit; AltName: Full=OEC23;	TRINITY_DN64282_c3_g3_i3	AT2G30790.1	1.07e-25	Putative oxygen-evolving enhancer protein 2-2 [Source:UniProtKB/Swiss-Prot;Acc:O49344]	TRINITY_DN64282_c3_g3_i3	EDP03062	2.38e-24	Oxygen-evolving enhancer protein 2 of photosystem II [Source:UniProtKB/TrEMBL;Acc:A8IYH9]
TRINITY_DN64282_c5_g1	5110	5514	1.079	0.00558318	5173	5563	1.075	0.0279496	B
TRINITY_DN64333_c2_g1	5168	5707	1.104	0.000236829	5232	5757	1.1	0.00213465	B	TRINITY_DN64333_c2_g1_i4	AAS66886.1	5.91e-29	FocA-like [Euglena gracilis]	TRINITY_DN64333_c2_g1_i4	P35839.1	1.46e-11	RecName: Full=Probable formate transporter					TRINITY_DN64333_c2_g1_i5	EDO98442	3.07e-13	Formate nitrite transporter [Source:UniProtKB/TrEMBL;Acc:Q6IYG4]
TRINITY_DN64363_c1_g1	3116	3403	1.092	0.0066616	3154	3434	1.088	0.0234316	B	TRINITY_DN64363_c1_g1_i1	XP_019856467.1	8.83e-55	PREDICTED: histone chaperone ASF1A-like isoform X1 [Amphimedon queenslandica]	TRINITY_DN64363_c1_g1_i1	Q9CQE6.1	6.17e-55	RecName: Full=Histone chaperone ASF1A; AltName: Full=Anti-silencing function protein 1 homolog A	TRINITY_DN64363_c1_g1_i1	AT5G38110.1	7.82e-56	Histone chaperone ASF1B [Source:UniProtKB/Swiss-Prot;Acc:Q9LS09]	TRINITY_DN64363_c1_g1_i1	EDP02697	3.21e-48	Anti-silencing factor [Source:UniProtKB/TrEMBL;Acc:A8IZD4]					TRINITY_DN64363_c1_g1_i1	ENSP00000229595.5	5.25e-55	anti-silencing function 1A histone chaperone [Source:HGNC Symbol;Acc:HGNC:20995]	TRINITY_DN64363_c1_g1_i1	CAJ15961	3.24e-29	anti-silencing protein ASF 1 like protein, putative
TRINITY_DN64392_c0_g2	253	304	1.201	0.0288874	256	307	1.197	0.0131042	B
TRINITY_DN64404_c2_g1	146	103	-1.40647	0.00870476	148	104	-1.41243	0.00481704	B
TRINITY_DN64460_c1_g2	727	596	-1.221	0.000970986	736	601	-1.22549	0.00256532	B
TRINITY_DN64525_c2_g1	285	367	1.287	0.000850901	289	370	1.282	0.00127426	B	TRINITY_DN64525_c2_g1_i1	CCW72070.1	1.82e-20	unnamed protein product [Phytomonas sp. isolate Hart1]	TRINITY_DN64525_c2_g1_i1	Q8RWQ5.1	4.67e-07	RecName: Full=Probable folate-biopterin transporter 4	TRINITY_DN64525_c2_g1_i1	AT5G54860.1	5.52e-08	Probable folate-biopterin transporter 4 [Source:UniProtKB/Swiss-Prot;Acc:Q8RWQ5]													TRINITY_DN64525_c2_g1_i1	AAZ13127	9.31e-19	folate transporter, putative
TRINITY_DN64558_c5_g1	372	295	-1.26103	0.000142338	377	298	-1.26582	1.72827e-05	B
TRINITY_DN64602_c3_g1	9270	9970	1.075	0.0189477	9384	10058	1.072	0.0424541	B	TRINITY_DN64602_c3_g1_i4	AAF71706.1	2.5e-65	elongation factor 2, partial [Euglena gracilis]	TRINITY_DN64602_c3_g1_i4	Q90705.3	1.67e-55	RecName: Full=Elongation factor 2; Short=EF-2	TRINITY_DN64602_c3_g1_i4	AT3G12915.2	2.43e-47	Ribosomal protein S5/Elongation factor G/III/V family protein [Source:UniProtKB/TrEMBL;Acc:F4JB06]	TRINITY_DN64602_c3_g1_i4	EDO96511	1.03e-49	Elongation factor 2 [Source:UniProtKB/TrEMBL;Acc:A8JHX9]					TRINITY_DN64602_c3_g1_i4	ENSP00000307940.5	3.5e-54	eukaryotic translation elongation factor 2 [Source:HGNC Symbol;Acc:HGNC:3214]	TRINITY_DN64602_c3_g1_i4	EAN77875	2.94e-62	elongation factor 2
TRINITY_DN64626_c2_g1	648	549	-1.17925	0.0150266	657	554	-1.18483	0.0220126	B	TRINITY_DN64626_c2_g1_i22	XP_020904167.1	1.01e-12	hemicentin-1-like [Exaiptasia pallida]	TRINITY_DN64626_c2_g1_i4	Q9P283.4	4.18e-10	RecName: Full=Semaphorin-5B													TRINITY_DN64626_c2_g1_i4	ENSP00000479602.1	9.15e-11	semaphorin 5B [Source:HGNC Symbol;Acc:HGNC:10737]
TRINITY_DN64850_c1_g2	141	107	-1.31752	0.0218781	143	108	-1.321	0.00443653	B	TRINITY_DN64850_c1_g2_i1	WP_013195648.1	9.02e-33	helicase DnaB [Methanohalobium evestigatum]	TRINITY_DN64850_c1_g2_i1	Q8NXX6.1	9.63e-22	RecName: Full=Serine-aspartate repeat-containing protein D; Flags: Precursor
TRINITY_DN64883_c3_g1	411	515	1.252	0.000127053	416	520	1.248	0.0002893	B					TRINITY_DN64883_c3_g1_i14	Q8K2F0.2	1.6e-06	RecName: Full=Bromodomain-containing protein 3; AltName: Full=Bromodomain-containing FSH-like protein FSRG2													TRINITY_DN64883_c3_g1_i14	ENSP00000305918.6	6.45e-07	bromodomain containing 3 [Source:HGNC Symbol;Acc:HGNC:1104]
TRINITY_DN64930_c0_g1	293	237	-1.23609	0.0176983	297	239	-1.24069	0.00821535	B	TRINITY_DN64930_c0_g1_i14	EHB10727.1	2.51e-29	S-antigen protein, partial [Heterocephalus glaber]																	TRINITY_DN64930_c0_g1_i10	ENSP00000370420.1	3e-06	variable charge, X-linked 3B [Source:HGNC Symbol;Acc:HGNC:31838]
TRINITY_DN65003_c2_g1	1796	2056	1.144	1.88145e-05	1818	2074	1.141	0.000250156	B	TRINITY_DN65003_c2_g1_i1	XP_017218343.1	1.5e-09	PREDICTED: protein RNA-directed DNA methylation 3-like isoform X1 [Daucus carota subsp. sativus]	TRINITY_DN65003_c2_g1_i1	Q04832.1	1.06e-08	RecName: Full=DNA-binding protein HEXBP; AltName: Full=Hexamer-binding protein	TRINITY_DN65003_c2_g1_i1	AT3G43590.1	3.41e-11	Putative uncharacterized protein At3g43590 [Source:UniProtKB/TrEMBL;Acc:Q9FYD1]									TRINITY_DN65003_c2_g1_i1	ENSP00000426223.1	5.27e-06	CCHC-type zinc finger nucleic acid binding protein [Source:HGNC Symbol;Acc:HGNC:13164]	TRINITY_DN65003_c2_g1_i1	EAN78020	2.5e-08	universal minicircle sequence binding protein (UMSBP), putative
TRINITY_DN65061_c0_g1	104	66	-1.5625	0.0153342	105	67	-1.5674	0.0167589	B	TRINITY_DN65061_c0_g1_i1	XP_016608160.1	1.5e-27	hypothetical protein SPPG_04463 [Spizellomyces punctatus DAOM BR117]
TRINITY_DN65225_c2_g1	256	305	1.188	0.0322805	260	308	1.184	0.00931422	B	TRINITY_DN65225_c2_g1_i3	KYQ92333.1	9.64e-27	transmembrane protein [Dictyostelium lacteum]	TRINITY_DN65225_c2_g1_i3	Q8LF05.1	1.32e-24	RecName: Full=Rhomboid-like protein 19; Short=AtRBL19	TRINITY_DN65225_c2_g1_i3	AT3G07950.1	1.56e-25	Rhomboid-like protein 19 [Source:UniProtKB/Swiss-Prot;Acc:Q8LF05]	TRINITY_DN65225_c2_g1_i8	EDP04817	7.21e-14	rhomboid protein-related [Source:Projected from Arabidopsis thaliana (AT3G07950) TAIR;Acc:AT3G07950]					TRINITY_DN65225_c2_g1_i3	ENSP00000266025.3	3.36e-16	transmembrane protein 115 [Source:HGNC Symbol;Acc:HGNC:30055]
TRINITY_DN65232_c5_g2	299	229	-1.30378	0.000849232	303	232	-1.3089	0.000408237	B	TRINITY_DN65232_c5_g2_i8	WP_045317066.1	8.13e-18	peptidase S8 [Lechevalieria aerocolonigenes]	TRINITY_DN65232_c5_g2_i8	P80146.3	6.27e-12	RecName: Full=Extracellular serine proteinase; Flags: Precursor
TRINITY_DN65241_c4_g2	873	1032	1.183	5.86958e-05	884	1042	1.179	0.000569037	B
TRINITY_DN65241_c4_g3	271	328	1.207	0.0409742	274	331	1.203	0.0344002	B
TRINITY_DN65276_c5_g1	123	170	1.386	0.00796193	124	172	1.381	0.00476424	B
TRINITY_DN65299_c0_g2	63	180	2.838	1.13196e-15	64	182	2.825	7.17286e-14	B	TRINITY_DN65299_c0_g2_i1	ODQ68868.1	3.44e-34	hypothetical protein LIPSTDRAFT_225391, partial [Lipomyces starkeyi NRRL Y-11557]	TRINITY_DN65299_c0_g2_i5	Q8TGM6.1	1.33e-08	RecName: Full=Protein TAR1; AltName: Full=Transcript antisense to ribosomal RNA protein 1
TRINITY_DN65325_c4_g1	1099	951	-1.15607	0.034368	1112	960	-1.15875	0.0379671	B
TRINITY_DN65335_c7_g1	124	94	-1.31406	0.0377509	126	95	-1.31926	0.00927714	B
TRINITY_DN65342_c3_g1	8350	9270	1.11	5.97086e-05	8453	9352	1.106	0.000735643	B	TRINITY_DN65342_c3_g1_i2	XP_002300685.2	7.39e-41	hypothetical protein POPTR_0002s01920g [Populus trichocarpa]	TRINITY_DN65342_c3_g1_i2	Q99JH1.1	1.09e-18	RecName: Full=Ribonuclease P protein subunit p25-like protein; Short=RNase P protein subunit-like p25; AltName: Full=Rpp25-like protein	TRINITY_DN65342_c3_g1_i2	AT1G20220.1	1.8e-36	Alba DNA/RNA-binding protein [Source:UniProtKB/TrEMBL;Acc:Q944A2]									TRINITY_DN65342_c3_g1_i2	ENSP00000297613.4	2.42e-19	ribonuclease P/MRP subunit p25 like [Source:HGNC Symbol;Acc:HGNC:19909]	TRINITY_DN65342_c3_g1_i2	AAZ10795	4.9e-28	hypothetical protein, conserved
TRINITY_DN65382_c1_g1	517	630	1.217	0.00445059	524	636	1.213	0.0134218	B	TRINITY_DN65382_c1_g1_i6	DAA05883.1	6.69e-10	TPA_inf: chloroplast light-harvesting complex II protein precursor Lhcbm4 [Euglena gracilis]
TRINITY_DN65433_c0_g1	160	104	-1.5361	5.40542e-05	163	105	-1.54083	2.09762e-05	B
TRINITY_DN65524_c3_g1	10185	11050	1.085	0.0137445	10310	11148	1.081	0.0288	B	TRINITY_DN65524_c3_g1_i5	KXZ46591.1	4.22e-178	hypothetical protein GPECTOR_42g802 [Gonium pectorale]	TRINITY_DN65524_c3_g1_i5	P53991.1	2.3e-170	RecName: Full=Ferredoxin--NADP reductase, chloroplastic; Short=FNR; Flags: Precursor	TRINITY_DN65524_c3_g1_i5	AT4G05390.1	4.23e-148	Ferredoxin--NADP reductase, root isozyme 1, chloroplastic [Source:UniProtKB/Swiss-Prot;Acc:Q9M0V6]	TRINITY_DN65524_c3_g1_i5	EDP00292	1.19e-178	Ferredoxin--NADP reductase [Source:UniProtKB/TrEMBL;Acc:A8J6Y8]	TRINITY_DN65524_c3_g1_i5	BAA18459	1.4e-82	ferredoxin-NADP oxidoreductase	TRINITY_DN65524_c3_g1_i5	ENSP00000327251.6	4.53e-13	nitric oxide synthase 2 [Source:HGNC Symbol;Acc:HGNC:7873]	TRINITY_DN65524_c3_g1_i5	AAZ10786	1.26e-15	NADPH--cytochrome p450 reductase, putative
TRINITY_DN65549_c1_g3	214	171	-1.25313	0.0125527	217	173	-1.25628	0.000927309	B
TRINITY_DN65645_c2_g1	1334	1211	-1.10132	0.0439785	1351	1222	-1.10497	0.0490395	B	TRINITY_DN65645_c2_g1_i4	GAV69186.1	1.37e-36	ABC_tran domain-containing protein/ABC2_membrane domain-containing protein/PDR_assoc domain-containing protein, partial [Cephalotus follicularis]	TRINITY_DN65645_c2_g1_i4	Q0JLC5.1	1.78e-37	RecName: Full=ABC transporter G family member 36; Short=OsABCG36; AltName: Full=Pleiotropic drug resistance protein 9; Short=OsPDR9	TRINITY_DN65645_c2_g1_i4	AT2G26910.1	2.55e-34	PEC1 [Source:UniProtKB/TrEMBL;Acc:A0A178VNA5]	TRINITY_DN65645_c2_g1_i1	EDO99773	1.2e-30	ABC transporter [Source:UniProtKB/TrEMBL;Acc:A8J8F1]
TRINITY_DN65656_c0_g1	100	71	-1.41443	0.0186876	102	72	-1.41844	0.00791732	B					TRINITY_DN65656_c0_g1_i8	Q5XJ13.1	1.8e-06	RecName: Full=Ankyrin repeat and SAM domain-containing protein 6; AltName: Full=Ankyrin repeat domain-containing protein 14; AltName: Full=SamCystin; AltName: Full=Sterile alpha motif domain-containing protein 6; Short=SAM domain-containing protein 6	TRINITY_DN65656_c0_g1_i8	AT3G07170.1	9.17e-06	AT3g07170/T1B9_17 [Source:UniProtKB/TrEMBL;Acc:Q9SFU7]
TRINITY_DN65684_c1_g3	135	913	6.773	2.27979e-68	136	921	6.745	3.93589e-114	B	TRINITY_DN65684_c1_g3_i1	KWU42823.1	7.34e-134	ribosomal protein L6 [Rhodotorula sp. JG-1b]	TRINITY_DN65684_c1_g3_i1	Q10232.1	1.18e-76	RecName: Full=60S ribosomal protein L9-A	TRINITY_DN65684_c1_g3_i1	AT1G33120.1	5.43e-67	60S ribosomal protein L9-1 [Source:UniProtKB/Swiss-Prot;Acc:P49209]	TRINITY_DN65684_c1_g3_i1	EDO97976	8.81e-59	Ribosomal protein L9 [Source:UniProtKB/TrEMBL;Acc:A8JDP4]					TRINITY_DN65684_c1_g3_i1	ENSP00000400467.2	8.33e-66	ribosomal protein L9 [Source:HGNC Symbol;Acc:HGNC:10369]	TRINITY_DN65684_c1_g3_i1	EAN77540	4.77e-53	60S ribosomal protein L9, putative
TRINITY_DN65721_c2_g1	196	154	-1.27065	0.0136118	199	156	-1.27551	0.00201312	B
TRINITY_DN65768_c0_g1	568	641	1.128	0.0325383	575	647	1.124	0.0370324	B	TRINITY_DN65768_c0_g1_i3	XP_019878372.1	1.89e-27	PREDICTED: dual specificity protein phosphatase 12 [Aethina tumida]	TRINITY_DN65768_c0_g1_i3	Q9PW71.1	6.83e-24	RecName: Full=Dual specificity protein phosphatase 4; AltName: Full=Mitogen-activated protein kinase phosphatase 2; Short=MAP kinase phosphatase 2; Short=MKP-2	TRINITY_DN65768_c0_g1_i3	AT3G23610.1	5.97e-21	dual specificity protein phosphatase 1 [Source:TAIR;Acc:AT3G23610]	TRINITY_DN65768_c0_g1_i3	EDP02595	7.28e-20	MAP kinase phosphatase 3 [Source:UniProtKB/TrEMBL;Acc:A8IZX6]					TRINITY_DN65768_c0_g1_i3	ENSP00000240101.2	2.46e-24	dual specificity phosphatase 4 [Source:HGNC Symbol;Acc:HGNC:3070]	TRINITY_DN65768_c0_g1_i3	AAZ10837	9.08e-15	dual specificity protein phosphatase, putative
TRINITY_DN65810_c2_g1	675	590	-1.14155	0.0204031	683	596	-1.14679	0.022931	B	TRINITY_DN65810_c2_g1_i5	ETP25587.1	1.38e-26	hypothetical protein F441_01555 [Phytophthora parasitica CJ01A1]	TRINITY_DN65810_c2_g1_i1	Q7PC86.1	5.42e-18	RecName: Full=ABC transporter G family member 35; Short=ABC transporter ABCG.35; Short=AtABCG35; AltName: Full=Pleiotropic drug resistance protein 7	TRINITY_DN65810_c2_g1_i1	AT1G15210.1	6.4e-19	PDR7 [Source:UniProtKB/TrEMBL;Acc:A0A178WAD4]	TRINITY_DN65810_c2_g1_i5	EDO99773	9e-17	ABC transporter [Source:UniProtKB/TrEMBL;Acc:A8J8F1]	TRINITY_DN65810_c2_g1_i3	BAA10398	1.43e-07	high-affinity branched-chain amino acid transport ATP-binding protein					TRINITY_DN65810_c2_g1_i1	EAN78176	4.36e-07	ABC transporter, putative
TRINITY_DN65827_c4_g2	3302	3587	1.086	0.0179518	3343	3619	1.083	0.047305	B	TRINITY_DN65827_c4_g2_i4	WP_092994495.1	2.52e-70	superoxide dismutase [Fe] [Thiohalomonas denitrificans]	TRINITY_DN65827_c4_g2_i4	P09213.1	1.4e-66	RecName: Full=Superoxide dismutase [Fe]	TRINITY_DN65827_c4_g2_i4	AT5G51100.1	2.82e-42	Superoxide dismutase [Fe] 2, chloroplastic [Source:UniProtKB/Swiss-Prot;Acc:Q9LU64]	TRINITY_DN65827_c4_g2_i4	EDP05850	3.59e-54	Superoxide dismutase [Source:UniProtKB/TrEMBL;Acc:A8IGH1]	TRINITY_DN65827_c4_g2_i4	BAA18027	9.11e-58	superoxide dismutase	TRINITY_DN65827_c4_g2_i4	ENSP00000356022.4	4.87e-33	superoxide dismutase 2, mitochondrial [Source:HGNC Symbol;Acc:HGNC:11180]	TRINITY_DN65827_c4_g2_i4	AAZ11448	3.54e-68	iron superoxide dismutase, putative
TRINITY_DN65837_c0_g2	2896	2491	-1.16279	0.000880777	2932	2513	-1.16686	0.00224558	B	TRINITY_DN65837_c0_g2_i1	WP_092624197.1	2.14e-48	aldo/keto reductase [Jiangella sp. DSM 45060]	TRINITY_DN65837_c0_g2_i1	P49249.1	2.37e-43	RecName: Full=IN2-2 protein	TRINITY_DN65837_c0_g2_i1	AT1G60680.1	6.84e-41	Probable aldo-keto reductase 2 [Source:UniProtKB/Swiss-Prot;Acc:Q84M96]	TRINITY_DN65837_c0_g2_i14	EDO99318	3.37e-29	Predicted protein [Source:UniProtKB/TrEMBL;Acc:A8JA38]	TRINITY_DN65837_c0_g2_i1	BAA10842	3.47e-17	auxin-induced protein	TRINITY_DN65837_c0_g2_i1	ENSP00000411913.1	9.21e-14	aldo-keto reductase family 7 like (gene/pseudogene) [Source:HGNC Symbol;Acc:HGNC:24056]
TRINITY_DN65848_c0_g2	723	611	-1.18203	0.00157326	732	617	-1.18624	0.00324956	B	TRINITY_DN65848_c0_g2_i19	XP_017075266.1	2.34e-22	PREDICTED: Golgi-associated plant pathogenesis-related protein 1 isoform X1 [Drosophila eugracilis]	TRINITY_DN65848_c0_g2_i19	Q59ZX3.1	9.74e-20	RecName: Full=Repressed by EFG1 protein 1; AltName: Full=PRY family cell wall protein 2; Flags: Precursor	TRINITY_DN65848_c0_g2_i3	AT2G14580.1	5.38e-16	Pathogenesis-related protein 1 [Source:UniProtKB/Swiss-Prot;Acc:Q9ZNS4]	TRINITY_DN65848_c0_g2_i3	EDO99249	1.3e-18	Predicted protein [Source:UniProtKB/TrEMBL;Acc:A8J9Z5]					TRINITY_DN65848_c0_g2_i7	ENSP00000310770.2	6.27e-11	GLI pathogenesis related 1 like 1 [Source:HGNC Symbol;Acc:HGNC:28392]
TRINITY_DN65874_c4_g1	403	330	-1.221	0.0143745	408	333	-1.22549	0.0162164	B
TRINITY_DN65893_c1_g3	145	109	-1.32802	0.0440278	147	110	-1.33156	0.022617	B	TRINITY_DN65893_c1_g3_i1	XP_001030762.3	7.79e-13	cyclin-dependent kinase-like Serine/Threonine kinase family protein [Tetrahymena thermophila SB210]	TRINITY_DN65893_c1_g3_i2	Q54QI2.1	1.78e-12	RecName: Full=Serine/threonine-protein kinase DDB_G0283821	TRINITY_DN65893_c1_g3_i2	AT1G54960.2	6.98e-13	NP2 [Source:UniProtKB/TrEMBL;Acc:A0A178WKE3]	TRINITY_DN65893_c1_g3_i2	EDP05768	3.22e-13	NIMA-related kinase 5 [Source:UniProtKB/TrEMBL;Acc:Q6UPR1]	TRINITY_DN65893_c1_g3_i2	BAA10726	7.12e-07	eukaryotic protein kinase	TRINITY_DN65893_c1_g3_i1	ENSP00000395357.3	3.83e-12	3-phosphoinositide dependent protein kinase 1 [Source:HGNC Symbol;Acc:HGNC:8816]	TRINITY_DN65893_c1_g3_i2	EAN79411	3.16e-12	protein kinase, putative
TRINITY_DN65912_c1_g2	166	103	-1.62338	4.40315e-06	169	104	-1.62866	1.35533e-06	B
TRINITY_DN66037_c3_g1	78	109	1.407	0.0290174	78	110	1.402	0.0207896	B
TRINITY_DN66062_c1_g1	137	103	-1.33333	0.0338471	139	104	-1.33869	0.0128425	B
TRINITY_DN66089_c0_g1	216	101	-2.14133	7.31642e-13	219	102	-2.15054	4.86523e-12	B
TRINITY_DN66200_c4_g1	22002	24180	1.099	1.83065e-05	22274	24394	1.095	0.000173856	B	TRINITY_DN66200_c4_g1_i4	ADJ93799.1	3.18e-43	chloroplast photosystem II protein M precursor, partial [Euglena gracilis]	TRINITY_DN66200_c4_g1_i2	Q32RW2.1	4.25e-06	RecName: Full=Photosystem II reaction center protein M; Short=PSII-M	TRINITY_DN66200_c4_g1_i3	ATCG00220.1	9.47e-06	Photosystem II reaction center protein M [Source:UniProtKB/Swiss-Prot;Acc:P62109]	TRINITY_DN66200_c4_g1_i2	DAA00927	7.92e-06	Photosystem II reaction center protein M [Source:UniProtKB/Swiss-Prot;Acc:P92277]
TRINITY_DN66200_c6_g1	1742	2148	1.233	6.52576e-08	1763	2168	1.229	1.22014e-06	B	TRINITY_DN66200_c6_g1_i1	ADJ93799.1	1.13e-09	chloroplast photosystem II protein M precursor, partial [Euglena gracilis]
TRINITY_DN66286_c2_g1	11504	12508	1.087	0.0315196	11645	12618	1.084	0.0487886	B	TRINITY_DN66286_c2_g1_i4	DAA05887.1	3.89e-70	TPA_inf: chloroplast light-harvesting complex I protein precursor Lhca2 [Euglena gracilis]	TRINITY_DN66286_c2_g1_i2	P08975.1	8.73e-35	RecName: Full=Light-harvesting complex I LH35 proteins; Contains: RecName: Full=LH35 protein 1; Contains: RecName: Full=LH35 protein 2; Flags: Precursor	TRINITY_DN66286_c2_g1_i2	AT5G54270.1	3.92e-16	Chlorophyll a-b binding protein 3, chloroplastic [Source:UniProtKB/Swiss-Prot;Acc:Q9S7M0]	TRINITY_DN66286_c2_g1_i2	EDO96390	2.1e-17	Chlorophyll a-b binding protein, chloroplastic [Source:UniProtKB/TrEMBL;Acc:Q93WL4]
TRINITY_DN66460_c1_g2	816	1014	1.243	0.0213431	826	1024	1.239	0.00213465	B	TRINITY_DN66460_c1_g2_i2	ABF68591.1	1.51e-49	chloroplast sedoheptulose-1,7-bisphosphatase [Euglena gracilis]	TRINITY_DN66460_c1_g2_i2	P46284.1	1.04e-39	RecName: Full=Sedoheptulose-1,7-bisphosphatase, chloroplastic; AltName: Full=SED(1,7)P2ase; AltName: Full=Sedoheptulose bisphosphatase; Short=SBPase; Flags: Precursor	TRINITY_DN66460_c1_g2_i2	AT3G55800.1	3.34e-38	Sedoheptulose-1,7-bisphosphatase, chloroplastic [Source:UniProtKB/Swiss-Prot;Acc:P46283]	TRINITY_DN66460_c1_g2_i2	EDP04487	8.59e-43	Sedoheptulose-1,7-bisphosphatase [Source:UniProtKB/TrEMBL;Acc:A8IRK4]	TRINITY_DN66460_c1_g2_i2	BAA18418	8.68e-11	fructose 1,6-bisphosphatase	TRINITY_DN66460_c1_g2_i2	ENSP00000364486.3	3.32e-07	fructose-bisphosphatase 2 [Source:HGNC Symbol;Acc:HGNC:3607]	TRINITY_DN66460_c1_g2_i2	AAQ16037	5.51e-26	sedoheptulose-1,7-bisphosphatase
TRINITY_DN66460_c1_g5	820	994	1.211	3.2816e-08	830	1002	1.206	4.5888e-07	B	TRINITY_DN66460_c1_g5_i1	ABF68591.1	0	chloroplast sedoheptulose-1,7-bisphosphatase [Euglena gracilis]	TRINITY_DN66460_c1_g5_i1	P46284.1	2.42e-67	RecName: Full=Sedoheptulose-1,7-bisphosphatase, chloroplastic; AltName: Full=SED(1,7)P2ase; AltName: Full=Sedoheptulose bisphosphatase; Short=SBPase; Flags: Precursor	TRINITY_DN66460_c1_g5_i1	AT3G55800.1	3.62e-61	Sedoheptulose-1,7-bisphosphatase, chloroplastic [Source:UniProtKB/Swiss-Prot;Acc:P46283]	TRINITY_DN66460_c1_g5_i1	EDP04487	1.63e-70	Sedoheptulose-1,7-bisphosphatase [Source:UniProtKB/TrEMBL;Acc:A8IRK4]	TRINITY_DN66460_c1_g5_i1	BAA18418	9.34e-15	fructose 1,6-bisphosphatase	TRINITY_DN66460_c1_g5_i1	ENSP00000408025.1	3.15e-13	fructose-bisphosphatase 1 [Source:HGNC Symbol;Acc:HGNC:3606]	TRINITY_DN66460_c1_g5_i1	AAQ16037	4.98e-28	sedoheptulose-1,7-bisphosphatase
TRINITY_DN66460_c1_g6	389	464	1.191	0.0379305	394	468	1.187	0.0469905	B	TRINITY_DN66460_c1_g6_i1	ALR69600.1	5.42e-45	plastid sedoheptulose-1,7-bisphosphatase isoform 1, partial [Euglenaria anabaena var. minor]									TRINITY_DN66460_c1_g6_i1	EDP04487	6.36e-07	Sedoheptulose-1,7-bisphosphatase [Source:UniProtKB/TrEMBL;Acc:A8IRK4]
TRINITY_DN66464_c1_g2	3780	4138	1.094	0.00296994	3826	4174	1.091	0.0112388	B	TRINITY_DN66464_c1_g2_i2	XP_002182898.1	5.94e-08	GLNA, glutamine synthase [Phaeodactylum tricornutum CCAP 1055/1]
TRINITY_DN66464_c2_g1	292	226	-1.29534	0.0347422	296	228	-1.30039	0.0302216	B	TRINITY_DN66464_c2_g1_i1	KOO30748.1	1.05e-20	glutamine catalytic domain protein [Chrysochromulina sp. CCMP291]	TRINITY_DN66464_c2_g1_i1	Q54WR9.1	1.01e-09	RecName: Full=Type-3 glutamine synthetase; AltName: Full=Type-3 glutamate--ammonia ligase; Short=Type-3 GS									TRINITY_DN66464_c2_g1_i1	BAA18510	1.55e-07	glutamate--ammonia ligase
TRINITY_DN66525_c5_g1	112	50	-2.22222	1.91048e-09	113	51	-2.22717	3.19628e-09	B
TRINITY_DN66574_c16_g2	23739	25344	1.068	0.0155917	24032	25569	1.064	0.0326197	B	TRINITY_DN66574_c16_g2_i1	BAC06572.1	3.8e-89	malate synthase-isocitrate lyase [Euglena gracilis]	TRINITY_DN66574_c16_g2_i1	P21826.2	9.51e-14	RecName: Full=Malate synthase 2, glyoxysomal; AltName: Full=Degradation of allantoin protein 7	TRINITY_DN66574_c16_g2_i1	AT5G03860.2	1.19e-09	Malate synthase [Source:UniProtKB/Swiss-Prot;Acc:Q9LZC3]	TRINITY_DN66574_c16_g2_i1	EDP01419	1.09e-11	Malate synthase [Source:UniProtKB/TrEMBL;Acc:Q6X898]
TRINITY_DN66574_c16_g5	24822	26782	1.079	0.0103116	25126	27018	1.075	0.0172772	B	TRINITY_DN66574_c16_g5_i1	BAC06572.1	1.49e-39	malate synthase-isocitrate lyase [Euglena gracilis]	TRINITY_DN66574_c16_g5_i1	Q10663.2	3.5e-10	RecName: Full=Bifunctional glyoxylate cycle protein; AltName: Full=Gex-3-interacting protein 7; Includes: RecName: Full=Isocitrate lyase; Short=ICL; Short=Isocitrase; Short=Isocitratase; Includes: RecName: Full=Malate synthase	TRINITY_DN66574_c16_g5_i1	AT5G03860.2	1.46e-06	Malate synthase [Source:UniProtKB/Swiss-Prot;Acc:Q9LZC3]	TRINITY_DN66574_c16_g5_i2	EDP01419	1.76e-08	Malate synthase [Source:UniProtKB/TrEMBL;Acc:Q6X898]
TRINITY_DN66574_c21_g1	16479	17781	1.079	0.00377633	16684	17938	1.075	0.0211214	B	TRINITY_DN66574_c21_g1_i1	BAC06572.1	1.24e-46	malate synthase-isocitrate lyase [Euglena gracilis]	TRINITY_DN66574_c21_g1_i1	P17432.1	3.4e-17	RecName: Full=Malate synthase, glyoxysomal	TRINITY_DN66574_c21_g1_i1	AT5G03860.2	2.56e-17	Malate synthase [Source:UniProtKB/Swiss-Prot;Acc:Q9LZC3]	TRINITY_DN66574_c21_g1_i1	EDP01419	2.22e-13	Malate synthase [Source:UniProtKB/TrEMBL;Acc:Q6X898]
TRINITY_DN66670_c0_g1	12450	13415	1.077	0.000681165	12605	13534	1.074	0.00902364	B	TRINITY_DN66670_c0_g1_i5	OLP92008.1	2.09e-22	Tankyrase [Symbiodinium microadriaticum]	TRINITY_DN66670_c0_g1_i5	Q9SAR5.2	7.8e-15	RecName: Full=Ankyrin repeat domain-containing protein 2A; Short=AtAKR2	TRINITY_DN66670_c0_g1_i5	AT4G35450.4	6.56e-16	Ankyrin repeat domain-containing protein 2 [Source:UniProtKB/TrEMBL;Acc:F4JN13]	TRINITY_DN66670_c0_g1_i5	EDP06143	5.92e-19	Predicted protein [Source:UniProtKB/TrEMBL;Acc:A8IEC1]					TRINITY_DN66670_c0_g1_i5	ENSP00000351881.3	2.77e-13	ankyrin repeat domain 46 [Source:HGNC Symbol;Acc:HGNC:27229]	TRINITY_DN66670_c0_g1_i5	EAN79772	1.57e-09	hypothetical protein, conserved
TRINITY_DN66707_c0_g1	110	82	-1.33511	0.0481933	111	83	-1.33869	0.0162822	B	TRINITY_DN66707_c0_g1_i3	5I9D_A	7.83e-42	Chain A, Crystal Structure Of Designed Pentatricopeptide Repeat Protein Dppr- U8a2 In Complex With Its Target Rna U8a2	TRINITY_DN66707_c0_g1_i3	Q9LYZ9.1	3.46e-34	RecName: Full=Pentatricopeptide repeat-containing protein At5g02860	TRINITY_DN66707_c0_g1_i3	AT5G02860.3	4.09e-35	Pentatricopeptide repeat-containing protein At5g02860 [Source:UniProtKB/Swiss-Prot;Acc:Q9LYZ9]	TRINITY_DN66707_c0_g1_i3	EDP05653	1.58e-35	Predicted protein [Source:UniProtKB/TrEMBL;Acc:A8IGB2]					TRINITY_DN66707_c0_g1_i10	ENSP00000403637.1	3.23e-06	leucine rich pentatricopeptide repeat containing [Source:HGNC Symbol;Acc:HGNC:15714]	TRINITY_DN66707_c0_g1_i10	EAN78409	1e-18	hypothetical protein, conserved
TRINITY_DN66724_c5_g1	2016	2334	1.159	9.34474e-08	2041	2355	1.154	8.9813e-06	B
TRINITY_DN66758_c1_g5	31568	34606	1.096	0.00067888	31957	34912	1.092	0.00160086	B	TRINITY_DN66758_c1_g5_i1	ACO50110.1	2.31e-94	elongation factor 1 alpha [Euglena gracilis]	TRINITY_DN66758_c1_g5_i1	P14963.1	3e-88	RecName: Full=Elongation factor 1-alpha; Short=EF-1-alpha	TRINITY_DN66758_c1_g5_i1	AT1G07930.1	1.22e-73	Elongation factor 1-alpha 4 [Source:UniProtKB/Swiss-Prot;Acc:Q8GTY0]	TRINITY_DN66758_c1_g5_i1	EDP01730	1.03e-15	Elongation factor-like protein [Source:UniProtKB/TrEMBL;Acc:A8J280]					TRINITY_DN66758_c1_g5_i1	ENSP00000479609.1	3.58e-72	eukaryotic translation elongation factor 1 alpha 1 [Source:HGNC Symbol;Acc:HGNC:3189]	TRINITY_DN66758_c1_g5_i1	EAN77636	2.53e-77	elongation factor 1-alpha
TRINITY_DN66763_c6_g1	103	151	1.466	0.000649493	104	152	1.46	0.000284316	B
TRINITY_DN66771_c4_g1	1478	1328	-1.11235	0.0178139	1497	1340	-1.11607	0.0250609	B
TRINITY_DN66773_c5_g1	122	173	1.42	0.0117278	123	174	1.416	0.00978152	B
TRINITY_DN66827_c1_g1	1157	910	-1.27065	0.00616901	1172	919	-1.27389	0.000399447	B	TRINITY_DN66827_c1_g1_i1	ORX58066.1	7.16e-11	hypothetical protein DM01DRAFT_1318768 [Hesseltinella vesiculosa]									TRINITY_DN66827_c1_g1_i1	EDP06664	7.91e-11	Flagellar associated protein [Source:UniProtKB/TrEMBL;Acc:A8I7W0]
TRINITY_DN66859_c0_g1	132	94	-1.41443	0.00348349	133	94	-1.41844	0.000714972	B	TRINITY_DN66859_c0_g1_i3	WP_092592639.1	8.89e-30	superoxide dismutase [Fe] [Idiomarina indica]	TRINITY_DN66859_c0_g1_i3	P0AGD5.2	1.91e-29	RecName: Full=Superoxide dismutase [Fe]	TRINITY_DN66859_c0_g1_i3	AT5G51100.3	4.43e-16	Superoxide dismutase [Fe] 2, chloroplastic [Source:UniProtKB/Swiss-Prot;Acc:Q9LU64]	TRINITY_DN66859_c0_g1_i3	EDP05850	7.57e-17	Superoxide dismutase [Source:UniProtKB/TrEMBL;Acc:A8IGH1]	TRINITY_DN66859_c0_g1_i3	BAA18027	1.54e-17	superoxide dismutase	TRINITY_DN66859_c0_g1_i3	ENSP00000445015.1	3.91e-11	superoxide dismutase 2, mitochondrial [Source:HGNC Symbol;Acc:HGNC:11180]	TRINITY_DN66859_c0_g1_i1	EAN80448	2.12e-19	iron superoxide dismutase
TRINITY_DN66964_c2_g1	239	321	1.341	0.00427382	242	324	1.336	0.00538727	B
TRINITY_DN66986_c0_g1	3329	2938	-1.1325	0.00918133	3371	2963	-1.13766	0.0166809	B	TRINITY_DN66986_c0_g1_i8	OXB70326.1	6.44e-09	hypothetical protein H355_005465, partial [Colinus virginianus]	TRINITY_DN66986_c0_g1_i2	P35440.1	3.39e-10	RecName: Full=Thrombospondin-2; Flags: Precursor													TRINITY_DN66986_c0_g1_i2	ENSP00000441821.2	1.67e-10	adhesion G protein-coupled receptor B3 [Source:HGNC Symbol;Acc:HGNC:945]
TRINITY_DN66986_c1_g3	575	666	1.157	0.0130563	582	672	1.154	0.0224504	B	TRINITY_DN66986_c1_g3_i1	OLP78261.1	2.52e-11	putative ribosome biogenesis protein C8F11.04 [Symbiodinium microadriaticum]
TRINITY_DN67010_c1_g1	1127	1025	-1.10011	0.0358936	1141	1034	-1.10375	0.0386488	B	TRINITY_DN67010_c1_g1_i10	WP_092428194.1	1.57e-71	FMN-dependent NADH-azoreductase [Pseudomonas sagittaria]	TRINITY_DN67010_c1_g1_i10	Q47G91.1	2.97e-72	RecName: Full=FMN-dependent NADH-azoreductase; AltName: Full=Azo-dye reductase; AltName: Full=FMN-dependent NADH-azo compound oxidoreductase
TRINITY_DN67087_c18_g2	670	809	1.209	0.00579473	678	816	1.204	0.0185833	B
TRINITY_DN67097_c0_g1	2478	2289	-1.08342	0.0384309	2508	2309	-1.08696	0.0401662	B
TRINITY_DN67119_c6_g1	556	368	-1.51057	0.0347769	564	372	-1.51745	0.00104862	B	TRINITY_DN67119_c6_g1_i1	DAA05883.1	6.32e-70	TPA_inf: chloroplast light-harvesting complex II protein precursor Lhcbm4 [Euglena gracilis]	TRINITY_DN67119_c6_g1_i1	P14279.1	9.51e-47	RecName: Full=Chlorophyll a-b binding protein 5, chloroplastic; AltName: Full=LHCII type I CAB-5; Short=LHCP; Flags: Precursor	TRINITY_DN67119_c6_g1_i1	AT2G34430.1	2.08e-46	Chlorophyll a-b binding protein, chloroplastic [Source:UniProtKB/TrEMBL;Acc:Q39142]	TRINITY_DN67119_c6_g1_i1	EDO96390	2.77e-44	Chlorophyll a-b binding protein, chloroplastic [Source:UniProtKB/TrEMBL;Acc:Q93WL4]
TRINITY_DN67163_c0_g1	2936	1840	-1.5949	5.35954e-06	2975	1857	-1.60256	8.70384e-11	B	TRINITY_DN67163_c0_g1_i5	ABW06956.1	2.86e-23	chloroplast light-harvesting complex II protein precursor, partial [Euglena gracilis]	TRINITY_DN67163_c0_g1_i5	P12327.1	2.16e-25	RecName: Full=Chlorophyll a-b binding protein of LHCII type 1; AltName: Full=Chlorophyll a-b binding protein of LHCII type I; Short=CAB; Short=LHCP	TRINITY_DN67163_c0_g1_i5	AT5G54270.1	2.62e-08	Chlorophyll a-b binding protein 3, chloroplastic [Source:UniProtKB/Swiss-Prot;Acc:Q9S7M0]	TRINITY_DN67163_c0_g1_i5	EDO96390	1.37e-07	Chlorophyll a-b binding protein, chloroplastic [Source:UniProtKB/TrEMBL;Acc:Q93WL4]													Organelles, especially chloroplasts can act as a metal sink within the cell. An upregulation in these genes can account for more places for excess Hg to reside
TRINITY_DN67163_c0_g2	4991	3066	-1.62866	9.83765e-07	5056	3094	-1.63399	3.33172e-12	B	TRINITY_DN67163_c0_g2_i3	DAA05885.1	2.29e-83	TPA_inf: chloroplast light-harvesting complex II protein precursor Lhcbm5 [Euglena gracilis]	TRINITY_DN67163_c0_g2_i3	P22686.1	6.98e-56	RecName: Full=Chlorophyll a-b binding protein of LHCII type I, chloroplastic; Short=CAB; Short=LHCP; Flags: Precursor	TRINITY_DN67163_c0_g2_i3	AT1G29910.1	3.08e-55	Chlorophyll a-b binding protein 3, chloroplastic [Source:UniProtKB/Swiss-Prot;Acc:Q8VZ87]	TRINITY_DN67163_c0_g2_i3	EDP00188	3.45e-58	Chlorophyll a-b binding protein, chloroplastic [Source:UniProtKB/TrEMBL;Acc:Q9ZSJ4]
TRINITY_DN67163_c0_g3	4972	3137	-1.58479	0.000571663	5036	3167	-1.58983	1.44239e-07	B	TRINITY_DN67163_c0_g3_i1	ABW06956.1	1.77e-57	chloroplast light-harvesting complex II protein precursor, partial [Euglena gracilis]	TRINITY_DN67163_c0_g3_i1	P27517.1	1.41e-41	RecName: Full=Chlorophyll a-b binding protein of LHCII type I, chloroplastic; Short=CAB; Short=LHCP; Flags: Precursor	TRINITY_DN67163_c0_g3_i1	AT2G34430.1	9.49e-41	Chlorophyll a-b binding protein, chloroplastic [Source:UniProtKB/TrEMBL;Acc:Q39142]	TRINITY_DN67163_c0_g3_i1	EDO98358	2.21e-42	Chlorophyll a-b binding protein, chloroplastic [Source:UniProtKB/TrEMBL;Acc:A8JCU4]													Organelles, especially chloroplasts can act as a metal sink within the cell. An upregulation in these genes can account for more places for excess Hg to reside
TRINITY_DN67169_c1_g2	1666	1396	-1.19332	4.73876e-05	1687	1408	-1.1976	0.000173843	B	TRINITY_DN67169_c1_g2_i9	CDY63361.1	5.6e-56	BnaC07g50030D [Brassica napus]	TRINITY_DN67169_c1_g2_i9	Q7FMW4.1	5.82e-54	RecName: Full=ABC transporter G family member 38; Short=OsABCG38; AltName: Full=Pleiotropic drug resistance protein 15; Short=OsPDR15	TRINITY_DN67169_c1_g2_i9	AT1G15210.1	8.47e-53	PDR7 [Source:UniProtKB/TrEMBL;Acc:A0A178WAD4]	TRINITY_DN67169_c1_g2_i9	EDO99773	1.9e-41	ABC transporter [Source:UniProtKB/TrEMBL;Acc:A8J8F1]					TRINITY_DN67169_c1_g2_i2	ENSP00000484289.1	7.3e-10	ATP binding cassette subfamily G member 4 [Source:HGNC Symbol;Acc:HGNC:13884]	TRINITY_DN67169_c1_g2_i2	EAN78176	3.05e-08	ABC transporter, putative
TRINITY_DN67199_c0_g1	422	342	-1.23609	0.0162727	427	344	-1.24069	0.0191269	B
TRINITY_DN67366_c2_g1	607	511	-1.18765	0.00085884	615	516	-1.19048	0.000865283	B	TRINITY_DN67366_c2_g1_i1	XP_010528954.1	5.17e-58	PREDICTED: ABC transporter G family member 29-like [Tarenaya hassleriana]	TRINITY_DN67366_c2_g1_i1	Q7PC86.1	1.58e-58	RecName: Full=ABC transporter G family member 35; Short=ABC transporter ABCG.35; Short=AtABCG35; AltName: Full=Pleiotropic drug resistance protein 7	TRINITY_DN67366_c2_g1_i1	AT1G15210.1	1.86e-59	PDR7 [Source:UniProtKB/TrEMBL;Acc:A0A178WAD4]	TRINITY_DN67366_c2_g1_i1	EDO99773	1.76e-48	ABC transporter [Source:UniProtKB/TrEMBL;Acc:A8J8F1]	TRINITY_DN67366_c2_g1_i4	BAA10724	2.55e-12	ABC transporter	TRINITY_DN67366_c2_g1_i4	ENSP00000426917.1	1.64e-19	ATP binding cassette subfamily G member 2 (Junior blood group) [Source:HGNC Symbol;Acc:HGNC:74]	TRINITY_DN67366_c2_g1_i4	EAN78176	7.04e-21	ABC transporter, putative
TRINITY_DN67419_c7_g1	1033	907	-1.13766	0.0159667	1046	915	-1.14155	0.0241826	B
TRINITY_DN67494_c12_g2	202	147	-1.37174	0.020872	204	148	-1.37552	0.0167589	B
TRINITY_DN67528_c0_g1	162	420	2.587	6.32884e-10	164	424	2.576	7.66972e-17	B	TRINITY_DN67528_c0_g1_i12	KGK36474.1	8.56e-79	hypothetical protein JL09_g4372 [Pichia kudriavzevii]	TRINITY_DN67528_c0_g1_i17	Q6CQE5.2	2.74e-34	RecName: Full=Protein TAR1
TRINITY_DN67715_c1_g3	354	284	-1.24533	0.0387812	358	286	-1.25	0.0372729	B
TRINITY_DN67730_c1_g3	2522	2826	1.12	0.011988	2552	2851	1.117	0.0242252	B					TRINITY_DN67730_c1_g3_i1	Q9ZR03.1	1.48e-06	RecName: Full=Cytochrome b6-f complex iron-sulfur subunit, chloroplastic; AltName: Full=Plastohydroquinone:plastocyanin oxidoreductase iron-sulfur protein; AltName: Full=Proton gradient regulation protein 1; AltName: Full=Rieske iron-sulfur protein; Short	TRINITY_DN67730_c1_g3_i1	AT4G03280.2	1.74e-07	Cytochrome b6-f complex iron-sulfur subunit, chloroplastic [Source:UniProtKB/Swiss-Prot;Acc:Q9ZR03]
TRINITY_DN67730_c1_g4	5220	5666	1.085	0.000843857	5284	5717	1.082	0.00775595	B	TRINITY_DN67730_c1_g4_i1	OTG31581.1	2.31e-34	putative cytochrome b6-f complex iron-sulfur subunit protein [Helianthus annuus]	TRINITY_DN67730_c1_g4_i1	P49728.1	9.72e-34	RecName: Full=Cytochrome b6-f complex iron-sulfur subunit, chloroplastic; AltName: Full=Plastohydroquinone:plastocyanin oxidoreductase iron-sulfur protein; AltName: Full=Rieske iron-sulfur protein; Short=ISP; Short=RISP; Flags: Precursor	TRINITY_DN67730_c1_g4_i1	AT4G03280.1	2.64e-29	Cytochrome b6-f complex iron-sulfur subunit, chloroplastic [Source:UniProtKB/Swiss-Prot;Acc:Q9ZR03]	TRINITY_DN67730_c1_g4_i1	EDO99286	3.63e-35	Cytochrome b6-f complex iron-sulfur subunit, chloroplastic [Source:UniProtKB/Swiss-Prot;Acc:P49728]	TRINITY_DN67730_c1_g4_i1	BAA17628	1.31e-27	plastoquinol--plastocyanin reductase
TRINITY_DN67829_c0_g1	5778	4763	-1.21359	2.39774e-08	5850	4805	-1.21803	8.46899e-07	B	TRINITY_DN67829_c0_g1_i5	XP_005847930.1	1.86e-137	hypothetical protein CHLNCDRAFT_22703 [Chlorella variabilis]	TRINITY_DN67829_c0_g1_i5	A9RHX1.1	4.33e-133	RecName: Full=Thiamine thiazole synthase 1, chloroplastic; AltName: Full=Thiazole biosynthetic enzyme 1; Flags: Precursor	TRINITY_DN67829_c0_g1_i5	AT5G54770.1	5.92e-129	Thiamine thiazole synthase, chloroplastic [Source:UniProtKB/TrEMBL;Acc:A0A178UNL2]	TRINITY_DN67829_c0_g1_i5	EDO99354	2.89e-131	Thiamine thiazole synthase, chloroplastic [Source:UniProtKB/Swiss-Prot;Acc:A8J9T5]
TRINITY_DN67893_c2_g4	254	308	1.209	0.0425705	257	311	1.205	0.0273641	B	TRINITY_DN67893_c2_g4_i1	XP_005841861.1	1.1e-43	hypothetical protein GUITHDRAFT_91458 [Guillardia theta CCMP2712]	TRINITY_DN67893_c2_g4_i1	Q8ST66.1	7.25e-42	RecName: Full=ABC transporter G family member 18; AltName: Full=ABC transporter ABCG.18; AltName: Full=ABC transporter mdrA2	TRINITY_DN67893_c2_g4_i1	AT3G16340.2	3.03e-41	ABC transporter G family member 29 [Source:UniProtKB/Swiss-Prot;Acc:Q94A18]	TRINITY_DN67893_c2_g4_i1	EDP04156	2.28e-38	Predicted protein [Source:UniProtKB/TrEMBL;Acc:A8IT35]	TRINITY_DN67893_c2_g4_i1	BAA10724	1.23e-17	ABC transporter	TRINITY_DN67893_c2_g4_i1	ENSP00000426917.1	2.24e-26	ATP binding cassette subfamily G member 2 (Junior blood group) [Source:HGNC Symbol;Acc:HGNC:74]	TRINITY_DN67893_c2_g4_i1	EAN78143	1.32e-24	ATP-binding cassette protein, putative
TRINITY_DN67894_c4_g1	1022	902	-1.1325	0.0236255	1035	910	-1.13636	0.0288685	B
TRINITY_DN67903_c0_g1	120	175	1.465	0.00332906	121	176	1.458	0.00350421	B
TRINITY_DN67927_c2_g1	1106	1280	1.155	0.000469174	1120	1291	1.152	0.00203674	B
TRINITY_DN67945_c3_g1	2316	2604	1.124	0.00025036	2344	2627	1.12	0.00143549	B	TRINITY_DN67945_c3_g1_i13	ACI12882.1	1.32e-32	NAD-dependent alcohol dehydrogenase [Euglena gracilis]	TRINITY_DN67945_c3_g1_i13	O31186.1	6.32e-14	RecName: Full=Alcohol dehydrogenase
TRINITY_DN67981_c1_g1	849	958	1.128	0.00459252	860	967	1.124	0.00859599	B	TRINITY_DN67981_c1_g1_i2	ORC86331.1	2.01e-175	cystathionine beta-lyase-like protein [Trypanosoma theileri]	TRINITY_DN67981_c1_g1_i2	P53780.1	1.92e-140	RecName: Full=Cystathionine beta-lyase, chloroplastic; Short=CBL; AltName: Full=Beta-cystathionase; AltName: Full=Cysteine lyase; Flags: Precursor	TRINITY_DN67981_c1_g1_i2	AT3G57050.5	5.93e-142	Cystathionine beta-lyase, chloroplastic [Source:UniProtKB/Swiss-Prot;Acc:P53780]	TRINITY_DN67981_c1_g1_i2	EDO98869	4.16e-122	Cystathionine beta-lyase [Source:UniProtKB/TrEMBL;Acc:A8JB47]					TRINITY_DN67981_c1_g1_i2	ENSP00000359976.3	4.09e-76	cystathionine gamma-lyase [Source:HGNC Symbol;Acc:HGNC:2501]	TRINITY_DN67981_c1_g1_i2	EAN77147	2.13e-64	cystathione gamma lyase, putative
TRINITY_DN68008_c0_g1	368	203	-1.81488	0.0283106	373	205	-1.81818	0.000316556	B	TRINITY_DN68008_c0_g1_i16	WP_041565493.1	7.12e-10	hypothetical protein [Nostoc punctiforme]
TRINITY_DN68190_c12_g1	319	250	-1.27065	0.00452241	324	253	-1.27551	0.00309975	B	TRINITY_DN68190_c12_g1_i4	BAC05484.2	6.86e-103	ascorbate peroxidase [Euglena gracilis]	TRINITY_DN68190_c12_g1_i4	Q0JEQ2.1	1.08e-52	RecName: Full=Probable L-ascorbate peroxidase 3, peroxisomal; AltName: Full=OsAPx3	TRINITY_DN68190_c12_g1_i4	AT4G35000.1	1.39e-51	L-ascorbate peroxidase 3, peroxisomal [Source:UniProtKB/Swiss-Prot;Acc:Q42564]	TRINITY_DN68190_c12_g1_i3	EDP00040	1.72e-47	Cytochrome c peroxidase [Source:UniProtKB/TrEMBL;Acc:A8J7X9]	TRINITY_DN68190_c12_g1_i4	BAA17975	4.69e-09	catalase hpi
TRINITY_DN68192_c6_g1	1580	1738	1.1	0.0100491	1599	1753	1.096	0.0262375	B	TRINITY_DN68192_c6_g1_i9	OEU08770.1	2.74e-98	hypothetical protein FRACYDRAFT_195871 [Fragilariopsis cylindrus CCMP1102]
TRINITY_DN68213_c0_g1	593	668	1.126	0.0299233	600	674	1.123	0.0336639	B	TRINITY_DN68213_c0_g1_i1	NP_001080683.1	3.29e-121	archain 1 L homeolog [Xenopus laevis]	TRINITY_DN68213_c0_g1_i1	Q5ZL57.1	3.02e-118	RecName: Full=Coatomer subunit delta; AltName: Full=Archain; AltName: Full=Delta-coat protein; Short=Delta-COP	TRINITY_DN68213_c0_g1_i7	AT5G05010.1	4.72e-56	AT5G05010 protein [Source:UniProtKB/TrEMBL;Acc:B9DGK9]	TRINITY_DN68213_c0_g1_i7	EDP06738	6.32e-61	Coatomer subunit delta [Source:UniProtKB/TrEMBL;Acc:A8I901]					TRINITY_DN68213_c0_g1_i1	ENSP00000264028.4	2.88e-118	archain 1 [Source:HGNC Symbol;Acc:HGNC:649]	TRINITY_DN68213_c0_g1_i7	AAZ13289	1.02e-40	coatomer delta subunit, putative
TRINITY_DN68221_c0_g2	1549	1858	1.2	4.31473e-06	1568	1874	1.195	5.25006e-05	B
TRINITY_DN68224_c10_g6	580	404	-1.43678	5.30148e-09	587	408	-1.44092	8.94012e-08	B	TRINITY_DN68224_c10_g6_i2	WP_062952619.1	3.55e-30	MULTISPECIES: 2-isopropylmalate synthase [Thalassospira]	TRINITY_DN68224_c10_g6_i2	Q3SQ49.1	3.58e-29	RecName: Full=2-isopropylmalate synthase; AltName: Full=Alpha-IPM synthase; AltName: Full=Alpha-isopropylmalate synthase	TRINITY_DN68224_c10_g6_i2	AT1G18500.1	5.65e-24	2-isopropylmalate synthase 1, chloroplastic [Source:UniProtKB/Swiss-Prot;Acc:Q9LPR4]	TRINITY_DN68224_c10_g6_i2	EDP08580	9.26e-30	Isopropylmalate synthase [Source:UniProtKB/TrEMBL;Acc:A8HXS9]	TRINITY_DN68224_c10_g6_i2	BAA10079	1.68e-27	2-isopropylmalate synthase
TRINITY_DN68351_c1_g2	3462	4008	1.158	1.487e-08	3504	4044	1.154	1.39523e-06	B	TRINITY_DN68351_c1_g2_i11	PCH43057.1	6.96e-33	hypothetical protein WOLCODRAFT_74357 [Wolfiporia cocos MD-104 SS10]	TRINITY_DN68351_c1_g2_i5	Q96DH6.1	6.65e-30	RecName: Full=RNA-binding protein Musashi homolog 2; Short=Musashi-2	TRINITY_DN68351_c1_g2_i5	AT2G33410.1	1.18e-32	Putative RNA-binding protein [Source:UniProtKB/TrEMBL;Acc:O22791]	TRINITY_DN68351_c1_g2_i11	EDP05699	8.48e-26	Predicted protein [Source:UniProtKB/TrEMBL;Acc:A8IH75]	TRINITY_DN68351_c1_g2_i11	BAA17597	1.96e-06	RNA-binding protein	TRINITY_DN68351_c1_g2_i5	ENSP00000313616.3	2.53e-31	musashi RNA binding protein 2 [Source:HGNC Symbol;Acc:HGNC:18585]	TRINITY_DN68351_c1_g2_i11	AAZ13429	4.09e-09	RNA-binding protein, putative
TRINITY_DN68399_c4_g1	230	172	-1.33869	0.00344301	234	173	-1.34409	0.00160086	B
TRINITY_DN68402_c2_g1	253	324	1.282	0.000319963	256	327	1.278	7.70808e-05	B
TRINITY_DN68419_c4_g6	404	464	1.147	0.0467884	409	468	1.143	0.040225	B	TRINITY_DN68419_c4_g6_i1	XP_002678029.1	6.22e-71	predicted protein [Naegleria gruberi]	TRINITY_DN68419_c4_g6_i1	Q4G2J3.1	8.09e-66	RecName: Full=Derlin-2.2; AltName: Full=ZmDerlin2-2	TRINITY_DN68419_c4_g6_i1	AT4G04860.1	1.51e-65	Derlin-2.2 [Source:UniProtKB/Swiss-Prot;Acc:Q9ZS88]	TRINITY_DN68419_c4_g6_i1	EDO97961	1.61e-36	Derlin [Source:UniProtKB/TrEMBL;Acc:A8JDW9]					TRINITY_DN68419_c4_g6_i1	ENSP00000158771.4	1.28e-57	derlin 2 [Source:HGNC Symbol;Acc:HGNC:17943]	TRINITY_DN68419_c4_g6_i1	EAN79287	1.23e-25	hypothetical protein, conserved
TRINITY_DN68432_c0_g1	387	291	-1.33333	1.29824e-05	392	294	-1.3369	1.02172e-05	B
TRINITY_DN68504_c4_g1	284	224	-1.27065	0.0484323	288	226	-1.27714	0.0415461	B
TRINITY_DN68562_c6_g1	247	297	1.201	0.029807	250	300	1.196	0.0113577	B	TRINITY_DN68562_c6_g1_i1	KYM85398.1	1.08e-34	U6 snRNA-associated Sm-like protein LSm7, partial [Atta colombica]	TRINITY_DN68562_c6_g1_i1	Q9CQQ8.1	3.96e-32	RecName: Full=U6 snRNA-associated Sm-like protein LSm7	TRINITY_DN68562_c6_g1_i1	AT2G03870.1	1.75e-31	LSM7 [Source:UniProtKB/TrEMBL;Acc:A0A178VPR3]	TRINITY_DN68562_c6_g1_i1	EDP06058	4.94e-32	Small nuclear riboprotein, U6 sm-like protein [Source:UniProtKB/TrEMBL;Acc:A8IFM6]					TRINITY_DN68562_c6_g1_i1	ENSP00000252622.8	1.79e-32	LSM7 homolog, U6 small nuclear RNA and mRNA degradation associated [Source:HGNC Symbol;Acc:HGNC:20470]	TRINITY_DN68562_c6_g1_i1	AAZ11514	6.35e-08	U6 snRNA-associated Sm-like protein LSm7p
TRINITY_DN68589_c2_g1	1135	1332	1.174	1.29582e-05	1148	1344	1.17	8.43822e-05	B	TRINITY_DN68589_c2_g1_i1	OAO11932.1	3.94e-37	sodium/phosphate symporter [Blastocystis sp. ATCC 50177/Nand II]	TRINITY_DN68589_c2_g1_i6	Q9PLN5.1	4.5e-31	RecName: Full=Putative phosphate permease TC_0064	TRINITY_DN68589_c2_g1_i6	AT3G26570.1	1.1e-24	phosphate transporter 2;1 [Source:TAIR;Acc:AT3G26570]	TRINITY_DN68589_c2_g1_i1	EDP02027	4.08e-29	Phosphate transporter [Source:UniProtKB/TrEMBL;Acc:A8J0U4]					TRINITY_DN68589_c2_g1_i6	ENSP00000429712.1	1.4e-29	solute carrier family 20 member 2 [Source:HGNC Symbol;Acc:HGNC:10947]	TRINITY_DN68589_c2_g1_i6	CAJ15956	3.82e-25	phosphate-repressible phosphate permease, putative
TRINITY_DN68642_c4_g1	111	65	-1.70648	0.000475022	112	66	-1.71527	0.0005673	B	TRINITY_DN68642_c4_g1_i12	XP_001690889.1	3.64e-140	membrane AAA-metalloprotease [Chlamydomonas reinhardtii]	TRINITY_DN68642_c4_g1_i11	Q39102.2	8.52e-135	RecName: Full=ATP-dependent zinc metalloprotease FTSH 1, chloroplastic; Short=AtFTSH1; Flags: Precursor	TRINITY_DN68642_c4_g1_i11	AT1G50250.1	1.01e-135	ATP-dependent zinc metalloprotease FTSH 1, chloroplastic [Source:UniProtKB/Swiss-Prot;Acc:Q39102]	TRINITY_DN68642_c4_g1_i12	EDP05335	4.79e-144	Membrane AAA-metalloprotease [Source:UniProtKB/TrEMBL;Acc:A8IL08]	TRINITY_DN68642_c4_g1_i11	BAA17010	1.77e-133	cell division protein; FtsH	TRINITY_DN68642_c4_g1_i11	ENSP00000269143.2	5.87e-76	AFG3 like matrix AAA peptidase subunit 2 [Source:HGNC Symbol;Acc:HGNC:315]	TRINITY_DN68642_c4_g1_i11	EAN78168	2.22e-56	mitochondrial ATP-dependent zinc metallopeptidase, putative
TRINITY_DN68730_c1_g2	1130	577	-1.95695	9.64094e-07	1145	582	-1.96464	8.50889e-12	B
TRINITY_DN68796_c4_g3	104	74	-1.40647	0.0429207	105	74	-1.41044	0.0286817	B	TRINITY_DN68796_c4_g3_i4	WP_002618056.1	5.1e-16	endonuclease [Stigmatella aurantiaca]																					TRINITY_DN68796_c4_g3_i4	AAZ12172	3.5e-09	RNA-editing complex protein MP100
TRINITY_DN68813_c0_g1	116	64	-1.78891	0.000143441	117	65	-1.79533	0.00022247	B
TRINITY_DN68858_c7_g1	482	404	-1.19332	0.0464687	488	407	-1.1976	0.0431944	B	TRINITY_DN68858_c7_g1_i9	ETW99660.1	7.97e-08	hypothetical protein ETSY2_40445 [Candidatus Entotheonella sp. TSY2]
TRINITY_DN68900_c1_g1	8029	8887	1.107	0.000395911	8128	8967	1.103	0.00419448	B
TRINITY_DN68924_c6_g1	911	1012	1.111	0.0289964	922	1021	1.107	0.0445863	B	TRINITY_DN68924_c6_g1_i5	CUG89944.1	8.74e-42	Hypothetical protein, putative [Bodo saltans]	TRINITY_DN68924_c6_g1_i5	O82171.1	3.32e-38	RecName: Full=ADP-ribosylation factor GTPase-activating protein AGD10; Short=ARF GAP AGD10; AltName: Full=Protein ARF-GAP DOMAIN 10; Short=AtAGD10; AltName: Full=Protein MATERNAL EFFECT EMBRYO ARREST 28; AltName: Full=Protein ROOT AND POLLEN ARFGAP	TRINITY_DN68924_c6_g1_i5	AT2G35210.2	2.3e-39	RPA [Source:UniProtKB/TrEMBL;Acc:A0A178VQN0]	TRINITY_DN68924_c6_g1_i5	EDO98081	6.3e-41	Predicted protein [Source:UniProtKB/TrEMBL;Acc:A8JDA5]					TRINITY_DN68924_c6_g1_i5	ENSP00000434487.1	1.83e-34	ADP ribosylation factor GTPase activating protein 2 [Source:HGNC Symbol;Acc:HGNC:13504]	TRINITY_DN68924_c6_g1_i5	EAN77356	3e-34	ADP-ribosylation factor GTPase activating protein, putative
TRINITY_DN68938_c1_g1	1654	1815	1.098	0.0100491	1674	1831	1.094	0.0238378	B	TRINITY_DN68938_c1_g1_i2	CUG82099.1	0	serine-threonine protein kinase, putative [Bodo saltans]	TRINITY_DN68938_c1_g1_i5	Q84VQ3.2	3.99e-120	RecName: Full=CBL-interacting serine/threonine-protein kinase 26; AltName: Full=SNF1-related kinase 3.26; AltName: Full=SOS2-like protein kinase PKS26	TRINITY_DN68938_c1_g1_i5	AT5G21326.1	4.72e-121	Non-specific serine/threonine protein kinase [Source:UniProtKB/TrEMBL;Acc:A0A178URQ5]	TRINITY_DN68938_c1_g1_i3	EDO99409	5.18e-72	Predicted protein [Source:UniProtKB/TrEMBL;Acc:A8J9W4]	TRINITY_DN68938_c1_g1_i3	BAA18552	1.65e-18	serine/threonine protein kinase	TRINITY_DN68938_c1_g1_i3	ENSP00000467357.1	1.29e-79	BR serine/threonine kinase 1 [Source:HGNC Symbol;Acc:HGNC:18994]	TRINITY_DN68938_c1_g1_i3	AAZ12858	7.19e-147	serine/threonine kinase, putative
TRINITY_DN69032_c1_g3	23352	25159	1.077	0.0077055	23641	25384	1.074	0.0238378	B
TRINITY_DN69096_c1_g1	1238	978	-1.26422	0.034255	1254	987	-1.26904	0.00248339	B	TRINITY_DN69096_c1_g1_i4	CEO99958.1	2.54e-38	hypothetical protein PBRA_007692 [Plasmodiophora brassicae]	TRINITY_DN69096_c1_g1_i15	Q8VZE7.1	2.01e-08	RecName: Full=RAP domain-containing protein, chloroplastic; Short=AtRAP; Flags: Precursor	TRINITY_DN69096_c1_g1_i15	AT2G31890.1	2.38e-09	RAP domain-containing protein, chloroplastic [Source:UniProtKB/Swiss-Prot;Acc:Q8VZE7]	TRINITY_DN69096_c1_g1_i2	EDO99304	2.18e-20	Predicted protein of CLR family [Source:UniProtKB/TrEMBL;Acc:A8JA15]									TRINITY_DN69096_c1_g1_i2	AAZ11414	3.16e-17	hypothetical protein, conserved
TRINITY_DN69166_c5_g1	459	561	1.223	1.65553e-05	464	566	1.219	2.25598e-05	B	TRINITY_DN69166_c5_g1_i8	EJK75143.1	3.44e-49	hypothetical protein THAOC_03149 [Thalassiosira oceanica]	TRINITY_DN69166_c5_g1_i8	Q7ZZ03.1	1.47e-21	RecName: Full=Fucose mutarotase													TRINITY_DN69166_c5_g1_i8	ENSP00000278025.5	3.24e-18	fucose mutarotase [Source:HGNC Symbol;Acc:HGNC:24733]
TRINITY_DN69184_c4_g1	807	1098	1.362	1.29367e-14	817	1108	1.357	1.11283e-11	B
TRINITY_DN69191_c1_g2	1318	1467	1.112	0.00684057	1334	1480	1.109	0.0184524	B	TRINITY_DN69191_c1_g2_i1	WP_042207090.1	7.09e-07	translation initiation factor IF-2 [Paenibacillus durus]
TRINITY_DN69206_c0_g1	110	72	-1.51515	0.03034	111	73	-1.51745	0.0279551	B
TRINITY_DN69323_c1_g1	2118	2634	1.243	5.44641e-09	2144	2657	1.239	2.88936e-07	B	TRINITY_DN69323_c1_g1_i1	ORX75487.1	1.24e-08	phosphate:H+ symporter [Basidiobolus meristosporus CBS 931.73]	TRINITY_DN69323_c1_g1_i1	Q7XRH8.2	2.86e-06	RecName: Full=Putative inorganic phosphate transporter 1-13; Short=OsPT13; Short=OsPht1;13; AltName: Full=H(+)/Pi cotransporter	TRINITY_DN69323_c1_g1_i1	AT1G76430.1	4.96e-07	PHT1 [Source:UniProtKB/TrEMBL;Acc:Q0WRM8]
TRINITY_DN69323_c2_g1	1653	1954	1.182	1.06443e-07	1673	1971	1.178	4.1638e-06	B	TRINITY_DN69323_c2_g1_i3	XP_013897766.1	4.36e-133	Inorganic phosphate transporter 1-6 [Monoraphidium neglectum]	TRINITY_DN69323_c2_g1_i3	Q8GSD9.1	9.2e-106	RecName: Full=Inorganic phosphate transporter 1-2; Short=OsPT2; Short=OsPht1;2; AltName: Full=H(+)/Pi cotransporter; AltName: Full=OsPT1	TRINITY_DN69323_c2_g1_i3	AT5G43340.1	2.75e-101	Probable inorganic phosphate transporter 1-6 [Source:UniProtKB/Swiss-Prot;Acc:Q9ZWT3]	TRINITY_DN69323_c2_g1_i3	EDP04438	1.65e-42	Proton/phosphate symporter, splice variant b [Source:UniProtKB/TrEMBL;Acc:A8ISD6]	TRINITY_DN69323_c2_g1_i3	BAA10117	2.46e-07	glucose transport protein	TRINITY_DN69323_c2_g1_i3	ENSP00000479104.1	2.07e-15	SV2 related protein [Source:HGNC Symbol;Acc:HGNC:25417]
TRINITY_DN69362_c5_g1	6776	7603	1.122	0.000272688	6858	7670	1.118	0.00133863	B	TRINITY_DN69362_c5_g1_i1	ABW06947.1	2.81e-131	chloroplast light-harvesting complex I protein precursor [Euglena gracilis]	TRINITY_DN69362_c5_g1_i1	P08976.1	5.89e-112	RecName: Full=Light-harvesting complex I LH38 proteins; Contains: RecName: Full=LH38 protein 1; Contains: RecName: Full=LH38 protein 2; Contains: RecName: Full=LH38 protein 3; Flags: Precursor	TRINITY_DN69362_c5_g1_i1	AT1G29930.1	5.94e-26	Chlorophyll a-b binding protein 1, chloroplastic [Source:UniProtKB/Swiss-Prot;Acc:P04778]	TRINITY_DN69362_c5_g1_i1	EDP00188	1.41e-26	Chlorophyll a-b binding protein, chloroplastic [Source:UniProtKB/TrEMBL;Acc:Q9ZSJ4]
TRINITY_DN69396_c0_g2	97	147	1.517	0.00017561	98	148	1.511	5.11506e-05	B	TRINITY_DN69396_c0_g2_i2	XP_012198036.1	1.05e-19	hypothetical protein SPRG_04056 [Saprolegnia parasitica CBS 223.65]
TRINITY_DN69403_c3_g2	4343	4669	1.075	0.00577905	4397	4710	1.071	0.0307188	B
TRINITY_DN69408_c2_g1	340	282	-1.20627	0.0269585	344	284	-1.21065	0.0152908	B	TRINITY_DN69408_c2_g1_i1	EWM23499.1	7.71e-09	hypothetical protein Naga_100414g1 [Nannochloropsis gaditana]
TRINITY_DN69430_c0_g1	12104	13798	1.14	1.42791e-09	12253	13921	1.136	2.60443e-07	B
TRINITY_DN69453_c1_g2	437	549	1.255	4.02876e-06	443	554	1.251	1.01872e-05	B					TRINITY_DN69453_c1_g2_i5	A2BYP9.1	1.22e-07	RecName: Full=Photosystem I P700 chlorophyll a apoprotein A1; AltName: Full=PsaA	TRINITY_DN69453_c1_g2_i5	ATCG00350.1	2.61e-06	Photosystem I P700 chlorophyll a apoprotein A1 [Source:UniProtKB/Swiss-Prot;Acc:P56766]	TRINITY_DN69453_c1_g2_i5	DAA01471	5.19e-08		TRINITY_DN69453_c1_g2_i5	BAA17437	2.24e-08	P700 apoprotein subunit Ia
TRINITY_DN69494_c10_g1	171	217	1.267	0.0119766	173	219	1.262	0.00274627	B
TRINITY_DN69529_c9_g3	217	278	1.279	0.0214414	220	280	1.274	0.0219035	B
TRINITY_DN69530_c4_g1	3047	3326	1.091	0.00293698	3084	3355	1.088	0.0150061	B	TRINITY_DN69530_c4_g1_i12	OLP87259.1	1.78e-11	ELAV-like protein 1 [Symbiodinium microadriaticum]	TRINITY_DN69530_c4_g1_i12	W8E7I1.2	4.44e-07	RecName: Full=RNA-binding protein 3; AltName: Full=RNA-binding motif protein 3	TRINITY_DN69530_c4_g1_i12	AT5G04600.1	1.71e-08	AT5g04600/T32M21_200 [Source:UniProtKB/TrEMBL;Acc:Q9LZ65]	TRINITY_DN69530_c4_g1_i12	EDP01097	6.91e-08	RNA-binding (RRM/RBD/RNP motifs) family protein [Source:Projected from Arabidopsis thaliana (AT5G04600) TAIR;Acc:AT5G04600]					TRINITY_DN69530_c4_g1_i12	ENSP00000365946.1	3.2e-07	RNA binding motif (RNP1, RRM) protein 3 [Source:HGNC Symbol;Acc:HGNC:9900]	TRINITY_DN69530_c4_g1_i12	AAZ10631	1.05e-07	RNA-binding protein, putative
TRINITY_DN69536_c6_g2	575	911	1.584	1.10271e-24	582	919	1.578	2.49413e-20	B	TRINITY_DN69536_c6_g2_i10	NP_041898.1	5.86e-14	photosystem II protein K [Euglena gracilis]	TRINITY_DN69536_c6_g2_i10	P31481.1	2.07e-16	RecName: Full=Photosystem II reaction center protein K; Short=PSII-K; Flags: Precursor	TRINITY_DN69536_c6_g2_i10	ATCG00070.1	3.45e-09	Photosystem II reaction center protein K [Source:UniProtKB/Swiss-Prot;Acc:P56782]	TRINITY_DN69536_c6_g2_i10	DAA00907	5.75e-12	Photosystem II reaction center protein K [Source:UniProtKB/Swiss-Prot;Acc:P18263]	TRINITY_DN69536_c6_g2_i10	BAA17075	3.09e-10	photosystem II PsbK protein
TRINITY_DN69549_c0_g3	160	73	-2.19298	0.00845265	162	74	-2.1978	0.000105507	B
TRINITY_DN69639_c2_g1	216	173	-1.24688	0.0499077	218	174	-1.25	0.0189309	B	TRINITY_DN69639_c2_g1_i4	XP_001635259.1	1.19e-57	predicted protein [Nematostella vectensis]	TRINITY_DN69639_c2_g1_i4	Q7RTR2.2	8.33e-32	RecName: Full=NLR family CARD domain-containing protein 3; AltName: Full=CARD15-like protein; AltName: Full=Caterpiller protein 16.2; Short=CLR16.2; AltName: Full=NACHT, LRR and CARD domains-containing protein 3; AltName: Full=Nucleotide-binding oligomeri	TRINITY_DN69639_c2_g1_i4	AT1G10510.1	4.2e-26	Emb2004 [Source:UniProtKB/TrEMBL;Acc:Q93ZV8]	TRINITY_DN69639_c2_g1_i4	EDP09462	2.74e-19	Flagellar associated protein [Source:UniProtKB/TrEMBL;Acc:A8HMZ4]					TRINITY_DN69639_c2_g1_i4	ENSP00000323897.9	1.66e-32	NLR family CARD domain containing 3 [Source:HGNC Symbol;Acc:HGNC:29889]	TRINITY_DN69639_c2_g1_i4	EAN79168	2.78e-19	hypothetical protein, conserved
TRINITY_DN69639_c3_g1	225	275	1.223	0.0170356	228	277	1.219	0.00619468	B	TRINITY_DN69639_c3_g1_i9	XP_001635259.1	1.99e-43	predicted protein [Nematostella vectensis]	TRINITY_DN69639_c3_g1_i9	Q7RTR2.2	2.48e-33	RecName: Full=NLR family CARD domain-containing protein 3; AltName: Full=CARD15-like protein; AltName: Full=Caterpiller protein 16.2; Short=CLR16.2; AltName: Full=NACHT, LRR and CARD domains-containing protein 3; AltName: Full=Nucleotide-binding oligomeri	TRINITY_DN69639_c3_g1_i9	AT1G10510.1	2.6e-27	Emb2004 [Source:UniProtKB/TrEMBL;Acc:Q93ZV8]	TRINITY_DN69639_c3_g1_i9	EDP04469	3.13e-21	Predicted protein [Source:UniProtKB/TrEMBL;Acc:A8ISL2]					TRINITY_DN69639_c3_g1_i9	ENSP00000352039.6	5.42e-34	NLR family CARD domain containing 3 [Source:HGNC Symbol;Acc:HGNC:29889]	TRINITY_DN69639_c3_g1_i9	EAN78352	1.65e-23	hypothetical protein, conserved
TRINITY_DN69782_c4_g1	1316	2452	1.864	2.48486e-32	1332	2474	1.857	3.37109e-45	B	TRINITY_DN69782_c4_g1_i1	EJY65597.1	1.2e-22	hypothetical protein OXYTRI_14248 (macronuclear) [Oxytricha trifallax]
TRINITY_DN69812_c0_g1	240	182	-1.32275	0.0203211	243	183	-1.32626	0.0172109	B
TRINITY_DN69869_c1_g1	17	109	6.439	1.45683e-32	17	110	6.384	1.08128e-34	B	TRINITY_DN69869_c1_g1_i1	KWU45495.1	8.92e-95	hypothetical protein RHOSPDRAFT_28704 [Rhodotorula sp. JG-1b]	TRINITY_DN69869_c1_g1_i1	Q4P6E9.1	7.56e-66	RecName: Full=Cofilin; AltName: Full=Actin-depolymerizing factor 1	TRINITY_DN69869_c1_g1_i1	AT4G00680.1	1.55e-34	actin depolymerizing factor 8 [Source:TAIR;Acc:AT4G00680]	TRINITY_DN69869_c1_g1_i1	EDP03860	3.97e-23	Predicted protein [Source:UniProtKB/TrEMBL;Acc:A8ITH3]					TRINITY_DN69869_c1_g1_i1	ENSP00000340635.3	1.81e-19	cofilin 2 [Source:HGNC Symbol;Acc:HGNC:1875]	TRINITY_DN69869_c1_g1_i1	AAZ10549	4.24e-20	cofilin/actin depolymerizing factor, putative
TRINITY_DN69872_c0_g4	1159	1319	1.138	0.000719014	1173	1331	1.134	0.00216011	B	TRINITY_DN69872_c0_g4_i5	ORC91152.1	5.09e-93	small GTP-binding protein [Trypanosoma theileri]	TRINITY_DN69872_c0_g4_i5	O04267.1	2.92e-82	RecName: Full=GTP-binding protein SAR1B	TRINITY_DN69872_c0_g4_i5	AT1G56330.1	4.29e-83	SAR1B [Source:UniProtKB/TrEMBL;Acc:A0A178WM97]	TRINITY_DN69872_c0_g4_i5	EDO98600	1.39e-81	Sar-type small GTPase [Source:UniProtKB/TrEMBL;Acc:A8JC30]					TRINITY_DN69872_c0_g4_i5	ENSP00000404997.1	5.39e-77	secretion associated Ras related GTPase 1B [Source:HGNC Symbol;Acc:HGNC:10535]	TRINITY_DN69872_c0_g4_i5	AAZ11561	1.28e-93	ADP-ribosylation factor, putative
TRINITY_DN69879_c5_g1	5480	6077	1.109	0.000302935	5547	6131	1.105	0.00196068	B	TRINITY_DN69879_c5_g1_i1	XP_005647408.1	0	elongation factor EF-3 [Coccomyxa subellipsoidea C-169]	TRINITY_DN69879_c5_g1_i1	O94489.1	0	RecName: Full=Elongation factor 3; Short=EF-3	TRINITY_DN69879_c5_g1_i12	AT5G60790.1	4.97e-44	ABC transporter F family member 1 [Source:UniProtKB/Swiss-Prot;Acc:Q9FJH6]	TRINITY_DN69879_c5_g1_i1	EDP04237	0	Elongation factor EF-3 [Source:UniProtKB/TrEMBL;Acc:A8ISZ1]	TRINITY_DN69879_c5_g1_i12	BAA18411	1.41e-26	ABC transporter	TRINITY_DN69879_c5_g1_i12	ENSP00000292808.4	2.4e-44	ATP binding cassette subfamily F member 3 [Source:HGNC Symbol;Acc:HGNC:72]	TRINITY_DN69879_c5_g1_i12	EAN77741	1.71e-47	ABC transporter, putative
TRINITY_DN69947_c0_g1	159	207	1.306	0.0154574	161	209	1.3	0.00872068	B
TRINITY_DN70090_c0_g1	109	77	-1.43062	0.034749	111	77	-1.43472	0.0257028	B
TRINITY_DN70099_c1_g1	180	225	1.256	0.0111989	181	228	1.251	0.00175199	B
TRINITY_DN70127_c0_g1	436	627	1.437	0.0447707	442	632	1.431	0.00272208	B	TRINITY_DN70127_c0_g1_i3	XP_012756544.1	3.53e-85	hypothetical protein SAMD00019534_029570 [Acytostelium subglobosum LB1]	TRINITY_DN70127_c0_g1_i3	O94639.1	2.18e-30	RecName: Full=Zinc-regulated transporter 1; AltName: Full=High-affinity zinc transport protein zrt1	TRINITY_DN70127_c0_g1_i3	AT1G10970.1	4.19e-24	Zinc transporter 4, chloroplastic [Source:UniProtKB/Swiss-Prot;Acc:O04089]	TRINITY_DN70127_c0_g1_i4	EDP08759	3.55e-16	Zinc-nutrition responsive transporter [Source:UniProtKB/TrEMBL;Acc:A8HSY2]									TRINITY_DN70127_c0_g1_i3	EAN79853	2.34e-51	cation transporter, putative
TRINITY_DN70205_c0_g1	3754	4622	1.232	3.38152e-17	3800	4663	1.227	2.50295e-12	B	TRINITY_DN70205_c0_g1_i31	EPS62093.1	4.45e-10	hypothetical protein M569_12700, partial [Genlisea aurea]
TRINITY_DN70211_c4_g1	2678	2985	1.114	0.000557876	2711	3011	1.11	0.00342758	B	TRINITY_DN70211_c4_g1_i5	XP_012749479.1	4.76e-81	hypothetical protein SAMD00019534_105900 [Acytostelium subglobosum LB1]	TRINITY_DN70211_c4_g1_i5	Q86K32.2	1.08e-81	RecName: Full=Probable ubiquitin-conjugating enzyme E2 N; AltName: Full=E2 ubiquitin-conjugating enzyme N; AltName: Full=Ubiquitin carrier protein N; AltName: Full=Ubiquitin-protein ligase N	TRINITY_DN70211_c4_g1_i5	AT1G78870.2	7.36e-82	UBC35 [Source:UniProtKB/TrEMBL;Acc:A0A178WFI9]	TRINITY_DN70211_c4_g1_i5	EDP09748	2.45e-79	Predicted protein [Source:UniProtKB/TrEMBL;Acc:A8HQ77]					TRINITY_DN70211_c4_g1_i5	ENSP00000316176.2	1.58e-78	ubiquitin conjugating enzyme E2 N [Source:HGNC Symbol;Acc:HGNC:12492]	TRINITY_DN70211_c4_g1_i5	EAN76814	3.84e-71	ubiquitin-conjugating enzyme E2, putative
TRINITY_DN70260_c3_g2	108	65	-1.66389	0.0171936	110	66	-1.66945	0.0241221	B
TRINITY_DN70265_c1_g1	130	98	-1.32626	0.0264869	132	99	-1.33156	0.00663673	B
TRINITY_DN70275_c5_g1	450	521	1.155	0.0407848	456	525	1.151	0.043972	B	TRINITY_DN70275_c5_g1_i6	XP_005649187.1	6.76e-69	hypothetical protein COCSUDRAFT_53024 [Coccomyxa subellipsoidea C-169]	TRINITY_DN70275_c5_g1_i6	Q8BUV8.2	1.9e-58	RecName: Full=Protein GPR107; Flags: Precursor	TRINITY_DN70275_c5_g1_i6	AT5G42090.1	1.54e-57	Dbj|BAA84809.1 [Source:UniProtKB/TrEMBL;Acc:Q9FHX6]	TRINITY_DN70275_c5_g1_i6	EDP00597	4.43e-63	G protein-coupled seven transmembrane receptor [Source:UniProtKB/TrEMBL;Acc:A8J5P4]					TRINITY_DN70275_c5_g1_i12	ENSP00000336988.7	1.09e-59	G protein-coupled receptor 107 [Source:HGNC Symbol;Acc:HGNC:17830]
TRINITY_DN70359_c0_g1	139	83	-1.68634	6.26605e-05	141	83	-1.68919	6.25458e-05	B
TRINITY_DN70386_c1_g3	397	463	1.167	0.0209867	402	468	1.163	0.0221867	B	TRINITY_DN70386_c1_g3_i1	XP_001773118.1	1.01e-33	predicted protein [Physcomitrella patens]	TRINITY_DN70386_c1_g3_i1	O04425.3	1.25e-28	RecName: Full=Flowering time control protein FCA	TRINITY_DN70386_c1_g3_i1	AT4G16280.3	7.04e-30	Flowering time control protein FCA [Source:UniProtKB/Swiss-Prot;Acc:O04425]	TRINITY_DN70386_c1_g3_i1	EDP06114	1.52e-12	RNA-binding protein C3, CELF family [Source:UniProtKB/TrEMBL;Acc:A8IDT8]	TRINITY_DN70386_c1_g3_i1	BAA17597	2.42e-07	RNA-binding protein	TRINITY_DN70386_c1_g3_i1	ENSP00000470649.1	5.23e-29	CUGBP, Elav-like family member 4 [Source:HGNC Symbol;Acc:HGNC:14015]	TRINITY_DN70386_c1_g3_i1	AAZ13429	2.77e-14	RNA-binding protein, putative
TRINITY_DN70392_c10_g5	16008	17433	1.089	0.0012007	16208	17589	1.085	0.010417	B	TRINITY_DN70392_c10_g5_i1	AAK37834.1	3.63e-38	beta-tubulin [Euglena gracilis]	TRINITY_DN70392_c10_g5_i1	P34108.1	9.58e-40	RecName: Full=Tubulin beta chain; AltName: Full=Beta-tubulin	TRINITY_DN70392_c10_g5_i1	AT5G12250.1	4.84e-37	Tubulin beta chain [Source:UniProtKB/TrEMBL;Acc:A0A178UPR2]	TRINITY_DN70392_c10_g5_i1	EDP03008	1.02e-38	Tubulin beta chain [Source:UniProtKB/TrEMBL;Acc:A8IXZ0]					TRINITY_DN70392_c10_g5_i1	ENSP00000410829.2	3.18e-36	tubulin beta class I [Source:HGNC Symbol;Acc:HGNC:20778]	TRINITY_DN70392_c10_g5_i1	CAJ16365	3.15e-39	beta tubulin
TRINITY_DN70392_c11_g1	35378	38884	1.099	0.00279386	35812	39229	1.095	0.00417961	B	TRINITY_DN70392_c11_g1_i1	XP_011856688.1	6.13e-43	PREDICTED: tubulin beta-8 chain-like [Mandrillus leucophaeus]	TRINITY_DN70392_c11_g1_i1	P18699.1	1.77e-44	RecName: Full=Tubulin beta chain; AltName: Full=Beta-tubulin	TRINITY_DN70392_c11_g1_i1	AT4G20890.1	1.25e-41	Tubulin beta chain [Source:UniProtKB/TrEMBL;Acc:A0A178UU99]	TRINITY_DN70392_c11_g1_i1	EDP03008	4.04e-43	Tubulin beta chain [Source:UniProtKB/TrEMBL;Acc:A8IXZ0]					TRINITY_DN70392_c11_g1_i1	ENSP00000457610.1	3.22e-44	tubulin beta 8 class VIII [Source:HGNC Symbol;Acc:HGNC:20773]	TRINITY_DN70392_c11_g1_i1	CAJ16365	5.42e-42	beta tubulin
TRINITY_DN70392_c11_g2	22238	24251	1.09	0.000648496	22512	24466	1.087	0.00276879	B	TRINITY_DN70392_c11_g2_i1	ABX25945.1	1.59e-103	beta-tubulin, partial [Stephanopogon apogon]	TRINITY_DN70392_c11_g2_i1	P34108.1	5.44e-103	RecName: Full=Tubulin beta chain; AltName: Full=Beta-tubulin	TRINITY_DN70392_c11_g2_i1	AT5G23860.2	4.64e-99	Tubulin beta chain [Source:UniProtKB/TrEMBL;Acc:A0A178UKM5]	TRINITY_DN70392_c11_g2_i1	EDP03008	4.08e-101	Tubulin beta chain [Source:UniProtKB/TrEMBL;Acc:A8IXZ0]					TRINITY_DN70392_c11_g2_i1	ENSP00000392914.1	3.64e-95	tubulin beta class I [Source:HGNC Symbol;Acc:HGNC:20778]	TRINITY_DN70392_c11_g2_i1	CAJ16365	1.31e-100	beta tubulin
TRINITY_DN70392_c11_g3	61524	68160	1.108	0.0282339	62274	68758	1.104	0.0195683	B	TRINITY_DN70392_c11_g3_i4	XP_015222005.1	2.6e-43	PREDICTED: tubulin beta-4B chain, partial [Lepisosteus oculatus]	TRINITY_DN70392_c11_g3_i4	P50261.1	1.69e-46	RecName: Full=Tubulin beta-3 chain; AltName: Full=Beta-3-tubulin	TRINITY_DN70392_c11_g3_i4	AT5G12250.1	3.26e-41	Tubulin beta chain [Source:UniProtKB/TrEMBL;Acc:A0A178UPR2]	TRINITY_DN70392_c11_g3_i4	EDP03008	9.35e-44	Tubulin beta chain [Source:UniProtKB/TrEMBL;Acc:A8IXZ0]					TRINITY_DN70392_c11_g3_i4	ENSP00000468843.1	9.49e-46	tubulin beta 4A class IVa [Source:HGNC Symbol;Acc:HGNC:20774]	TRINITY_DN70392_c11_g3_i4	CAJ16365	5.78e-43	beta tubulin
TRINITY_DN70392_c11_g5	18952	20744	1.095	0.00299929	19185	20929	1.091	0.0093956	B	TRINITY_DN70392_c11_g5_i1	AJD08792.1	3.31e-45	beta-tubulin, partial [Pythium afertile]	TRINITY_DN70392_c11_g5_i1	P34108.1	6.41e-45	RecName: Full=Tubulin beta chain; AltName: Full=Beta-tubulin	TRINITY_DN70392_c11_g5_i1	AT2G29550.1	1.61e-43	Tubulin beta-7 chain [Source:UniProtKB/Swiss-Prot;Acc:P29515]	TRINITY_DN70392_c11_g5_i1	EDP03008	5.68e-45	Tubulin beta chain [Source:UniProtKB/TrEMBL;Acc:A8IXZ0]					TRINITY_DN70392_c11_g5_i1	ENSP00000468571.1	2.11e-43	tubulin beta 6 class V [Source:HGNC Symbol;Acc:HGNC:20776]	TRINITY_DN70392_c11_g5_i1	CAJ16365	3.7e-42	beta tubulin
TRINITY_DN70392_c13_g1	12120	13183	1.088	0.0153342	12269	13300	1.084	0.0336057	B	TRINITY_DN70392_c13_g1_i1	ADT65425.1	2.11e-37	beta-tubulin, partial [Ignatius tetrasporus]	TRINITY_DN70392_c13_g1_i1	P12457.1	9.85e-39	RecName: Full=Tubulin beta chain; AltName: Full=Beta-tubulin	TRINITY_DN70392_c13_g1_i1	AT5G62700.1	3.61e-36	Tubulin beta-2 chain [Source:UniProtKB/Swiss-Prot;Acc:Q56YW9]	TRINITY_DN70392_c13_g1_i1	EDP03008	5.1e-39	Tubulin beta chain [Source:UniProtKB/TrEMBL;Acc:A8IXZ0]					TRINITY_DN70392_c13_g1_i1	ENSP00000341289.4	1.04e-34	tubulin beta 4B class IVb [Source:HGNC Symbol;Acc:HGNC:20771]	TRINITY_DN70392_c13_g1_i1	CAJ16365	4.29e-37	beta tubulin
TRINITY_DN70392_c14_g1	2012	2370	1.178	0.043971	2038	2391	1.174	0.00772191	B	TRINITY_DN70392_c14_g1_i1	AHM94129.1	2.49e-30	beta-tubulin, partial [Discoplastis spathirhyncha]	TRINITY_DN70392_c14_g1_i1	P34108.1	6.23e-32	RecName: Full=Tubulin beta chain; AltName: Full=Beta-tubulin	TRINITY_DN70392_c14_g1_i1	AT5G12250.1	7.06e-31	Tubulin beta chain [Source:UniProtKB/TrEMBL;Acc:A0A178UPR2]	TRINITY_DN70392_c14_g1_i1	EDP03008	6.71e-33	Tubulin beta chain [Source:UniProtKB/TrEMBL;Acc:A8IXZ0]					TRINITY_DN70392_c14_g1_i1	ENSP00000410829.2	2.38e-29	tubulin beta class I [Source:HGNC Symbol;Acc:HGNC:20778]	TRINITY_DN70392_c14_g1_i1	CAJ16365	6.41e-33	beta tubulin
TRINITY_DN70420_c0_g1	288	184	-1.5625	0.0111554	292	186	-1.56986	0.000303028	B	TRINITY_DN70420_c0_g1_i11	XP_021879064.1	3.36e-32	hypothetical protein BCR41DRAFT_358024 [Lobosporangium transversale]	TRINITY_DN70420_c0_g1_i11	Q7RTR2.2	1.74e-20	RecName: Full=NLR family CARD domain-containing protein 3; AltName: Full=CARD15-like protein; AltName: Full=Caterpiller protein 16.2; Short=CLR16.2; AltName: Full=NACHT, LRR and CARD domains-containing protein 3; AltName: Full=Nucleotide-binding oligomeri	TRINITY_DN70420_c0_g1_i11	AT1G10510.1	2.85e-20	Emb2004 [Source:UniProtKB/TrEMBL;Acc:Q93ZV8]	TRINITY_DN70420_c0_g1_i11	EDP09462	1.13e-15	Flagellar associated protein [Source:UniProtKB/TrEMBL;Acc:A8HMZ4]					TRINITY_DN70420_c0_g1_i11	ENSP00000482302.1	8.48e-24	NLR family CARD domain containing 3 [Source:HGNC Symbol;Acc:HGNC:29889]	TRINITY_DN70420_c0_g1_i11	AAZ12208	8.24e-16	hypothetical protein, conserved
TRINITY_DN70433_c3_g1	14445	15602	1.08	0.00282659	14623	15740	1.076	0.0117201	B	TRINITY_DN70433_c3_g1_i5	BAA03529.2	1.73e-138	oxygen-evolving enhancer protein 1 precursor [Euglena gracilis]	TRINITY_DN70433_c3_g1_i5	P46483.2	7.03e-115	RecName: Full=Oxygen-evolving enhancer protein 1, chloroplastic; Short=OEE1; Flags: Precursor	TRINITY_DN70433_c3_g1_i5	AT3G50820.1	2.18e-45	Oxygen-evolving enhancer protein 1-2, chloroplastic [Source:UniProtKB/Swiss-Prot;Acc:Q9S841]	TRINITY_DN70433_c3_g1_i5	EDP02283	6.57e-50	Oxygen-evolving enhancer protein 1 of photosystem II [Source:UniProtKB/TrEMBL;Acc:A8J0E4]	TRINITY_DN70433_c3_g1_i5	BAA18474	2.1e-28	photosystem II manganese-stabilizing polypeptide
TRINITY_DN70433_c3_g2	2361	2612	1.106	0.000238959	2390	2636	1.102	0.0031789	B	TRINITY_DN70433_c3_g2_i1	BAA03529.2	3.54e-08	oxygen-evolving enhancer protein 1 precursor [Euglena gracilis]	TRINITY_DN70433_c3_g2_i1	P46483.2	1.03e-09	RecName: Full=Oxygen-evolving enhancer protein 1, chloroplastic; Short=OEE1; Flags: Precursor	TRINITY_DN70433_c3_g2_i1	AT3G50820.1	8.66e-06	Oxygen-evolving enhancer protein 1-2, chloroplastic [Source:UniProtKB/Swiss-Prot;Acc:Q9S841]	TRINITY_DN70433_c3_g2_i1	EDP02283	8.71e-06	Oxygen-evolving enhancer protein 1 of photosystem II [Source:UniProtKB/TrEMBL;Acc:A8J0E4]
TRINITY_DN70474_c11_g1	7409	7998	1.079	0.00152765	7500	8069	1.076	0.0130467	B	TRINITY_DN70474_c11_g1_i2	CAA61911.1	0	fructose-1,6-bisphosphate aldolase [Euglena gracilis]	TRINITY_DN70474_c11_g1_i2	Q9LF98.1	2.74e-119	RecName: Full=Fructose-bisphosphate aldolase 8, cytosolic; Short=AtFBA8; AltName: Full=Cytosolic aldolase 1; Short=cAld1	TRINITY_DN70474_c11_g1_i2	AT3G52930.1	3.24e-120	Fructose-bisphosphate aldolase [Source:UniProtKB/TrEMBL;Acc:A0A178V8L4]	TRINITY_DN70474_c11_g1_i2	EDO98285	4.1e-112	Fructose-bisphosphate aldolase [Source:UniProtKB/TrEMBL;Acc:A8JCY4]					TRINITY_DN70474_c11_g1_i2	ENSP00000226253.4	9.48e-113	aldolase, fructose-bisphosphate C [Source:HGNC Symbol;Acc:HGNC:418]	TRINITY_DN70474_c11_g1_i2	EAN77978	1.67e-97	fructose-bisphosphate aldolase, glycosomal, putative
TRINITY_DN70499_c5_g1	227	185	-1.22399	0.0383245	230	187	-1.2285	0.00832878	B
TRINITY_DN70635_c0_g1	749	606	-1.23762	2.86014e-06	759	612	-1.24069	1.15174e-05	B	TRINITY_DN70635_c0_g1_i2	KFX68945.1	1.31e-25	peptidase S8 [Pseudomonas taeanensis MS-3]	TRINITY_DN70635_c0_g1_i10	P23314.1	3.9e-21	RecName: Full=Extracellular protease; Flags: Precursor									TRINITY_DN70635_c0_g1_i9	BAA10823	6.36e-07	serine proteinase
TRINITY_DN70636_c4_g1	6320	6830	1.081	0.0151658	6398	6891	1.077	0.0381799	B	TRINITY_DN70636_c4_g1_i2	GAQ88858.1	5.1e-105	60S ribosomal protein L5 [Klebsormidium nitens]	TRINITY_DN70636_c4_g1_i2	Q4KTI3.1	4.04e-103	RecName: Full=60S ribosomal protein L5	TRINITY_DN70636_c4_g1_i2	AT3G25520.1	7.87e-99	RPL5A [Source:UniProtKB/TrEMBL;Acc:A0A178V891]	TRINITY_DN70636_c4_g1_i2	EDP09597	7.4e-90	Ribosomal protein L5 [Source:UniProtKB/TrEMBL;Acc:A8HP55]					TRINITY_DN70636_c4_g1_i2	ENSP00000359345.2	2.84e-87	ribosomal protein L5 [Source:HGNC Symbol;Acc:HGNC:10360]	TRINITY_DN70636_c4_g1_i2	EAN77331	9.41e-94	60S ribosomal protein L5, putative
TRINITY_DN70637_c1_g1	6458	7336	1.136	7.3673e-10	6538	7402	1.132	1.03234e-06	B
TRINITY_DN70648_c2_g1	105	137	1.302	0.0447269	107	138	1.297	0.0173792	B	TRINITY_DN70648_c2_g1_i1	XP_018459947.1	9.28e-43	PREDICTED: serine/threonine-protein phosphatase 2A activator-like [Raphanus sativus]	TRINITY_DN70648_c2_g1_i1	Q28717.1	3.74e-36	RecName: Full=Serine/threonine-protein phosphatase 2A activator; AltName: Full=PP2A, subunit B', PR53 isoform; AltName: Full=Phosphotyrosyl phosphatase activator; Short=PTPA; AltName: Full=Serine/threonine-protein phosphatase 2A regulatory subunit 4; AltN	TRINITY_DN70648_c2_g1_i1	AT4G08960.1	9.04e-42	Serine/threonine-protein phosphatase 2A activator [Source:UniProtKB/TrEMBL;Acc:Q9C5N3]	TRINITY_DN70648_c2_g1_i1	EDP09065	1.57e-11	Serine/threonine-protein phosphatase 2A activator [Source:UniProtKB/TrEMBL;Acc:A8HTV1]					TRINITY_DN70648_c2_g1_i1	ENSP00000377036.2	1.92e-35	protein phosphatase 2 phosphatase activator [Source:HGNC Symbol;Acc:HGNC:9308]	TRINITY_DN70648_c2_g1_i1	AAZ12938	2.4e-23	protein phosphatase 2A, regulatory subunit B, putative
TRINITY_DN70683_c0_g1	5987	3774	-1.5873	6.68482e-05	6065	3810	-1.59236	1.18126e-09	B	TRINITY_DN70683_c0_g1_i2	P12327.1	2.79e-39	RecName: Full=Chlorophyll a-b binding protein of LHCII type 1; AltName: Full=Chlorophyll a-b binding protein of LHCII type I; Short=CAB; Short=LHCP	TRINITY_DN70683_c0_g1_i2	P12327.1	9.84e-42	RecName: Full=Chlorophyll a-b binding protein of LHCII type 1; AltName: Full=Chlorophyll a-b binding protein of LHCII type I; Short=CAB; Short=LHCP	TRINITY_DN70683_c0_g1_i2	AT1G29930.1	7.31e-25	Chlorophyll a-b binding protein 1, chloroplastic [Source:UniProtKB/Swiss-Prot;Acc:P04778]	TRINITY_DN70683_c0_g1_i2	EDO98358	3.93e-29	Chlorophyll a-b binding protein, chloroplastic [Source:UniProtKB/TrEMBL;Acc:A8JCU4]
TRINITY_DN70683_c1_g2	34444	36833	1.069	0.0178655	34870	37160	1.066	0.0321373	B	TRINITY_DN70683_c1_g2_i6	ABW06948.1	1.12e-120	chloroplast light-harvesting complex I protein precursor, partial [Euglena gracilis]	TRINITY_DN70683_c1_g2_i6	P08975.1	9.26e-103	RecName: Full=Light-harvesting complex I LH35 proteins; Contains: RecName: Full=LH35 protein 1; Contains: RecName: Full=LH35 protein 2; Flags: Precursor	TRINITY_DN70683_c1_g2_i6	AT1G29910.1	4.41e-35	Chlorophyll a-b binding protein 3, chloroplastic [Source:UniProtKB/Swiss-Prot;Acc:Q8VZ87]	TRINITY_DN70683_c1_g2_i6	EDO96390	1.01e-35	Chlorophyll a-b binding protein, chloroplastic [Source:UniProtKB/TrEMBL;Acc:Q93WL4]
TRINITY_DN70684_c2_g1	119	171	1.443	0.00253564	120	173	1.437	0.00230772	B
TRINITY_DN70684_c4_g1	277	354	1.278	4.07e-05	280	357	1.273	2.28783e-06	B
TRINITY_DN70688_c4_g2	116	80	-1.44092	0.0075787	117	81	-1.44509	0.00292627	B	TRINITY_DN70688_c4_g2_i4	XP_008445110.1	1.48e-26	PREDICTED: endonuclease V isoform X1 [Cucumis melo]	TRINITY_DN70688_c4_g2_i4	Q8C9A2.2	3.05e-27	RecName: Full=Endonuclease V	TRINITY_DN70688_c4_g2_i5	AT4G31150.1	1.58e-25	At4g31150 [Source:UniProtKB/TrEMBL;Acc:Q8L9R0]	TRINITY_DN70688_c4_g2_i4	EDP04036	9.76e-19	endonuclease V family protein [Source:Projected from Arabidopsis thaliana (AT4G31150) TAIR;Acc:AT4G31150]					TRINITY_DN70688_c4_g2_i4	ENSP00000429190.1	3.59e-26	endonuclease V [Source:HGNC Symbol;Acc:HGNC:26640]	TRINITY_DN70688_c4_g2_i7	EAN78099	1.29e-15	endonuclease V, putative
TRINITY_DN70706_c0_g1	691	583	-1.18624	0.000503716	700	588	-1.19048	0.00104862	B
TRINITY_DN70708_c2_g1	1350	1550	1.148	0.00185227	1366	1564	1.144	0.00711712	B	TRINITY_DN70708_c2_g1_i6	AFO84301.1	5.96e-27	glutathione S-transferase [Prorocentrum minimum]	TRINITY_DN70708_c2_g1_i6	Q9CPU4.1	7.3e-13	RecName: Full=Microsomal glutathione S-transferase 3; Short=Microsomal GST-3; AltName: Full=Microsomal GST-III	TRINITY_DN70708_c2_g1_i6	AT1G65820.1	9.28e-21	Putative glutathione S-transferase [Source:UniProtKB/TrEMBL;Acc:F4IBL0]	TRINITY_DN70708_c2_g1_i6	EDO96603	9.72e-16	Glutathione S-transferase [Source:UniProtKB/TrEMBL;Acc:A8JHR4]					TRINITY_DN70708_c2_g1_i6	ENSP00000356863.4	8.01e-13	microsomal glutathione S-transferase 3 [Source:HGNC Symbol;Acc:HGNC:7064]
TRINITY_DN70854_c1_g1	6553	7152	1.092	0.00247846	6633	7216	1.088	0.0106553	B	TRINITY_DN70854_c1_g1_i4	AAS66886.1	8.16e-21	FocA-like [Euglena gracilis]
TRINITY_DN70899_c0_g1	2067	1671	-1.23609	1.48006e-06	2094	1686	-1.24069	3.63442e-05	B	TRINITY_DN70899_c0_g1_i7	KXS11173.1	7.4e-21	hypothetical protein M427DRAFT_443851 [Gonapodya prolifera JEL478]					TRINITY_DN70899_c0_g1_i5	AT1G65900.2	2.44e-13	At1g65900/F12P19_7 [Source:UniProtKB/TrEMBL;Acc:Q94A98]	TRINITY_DN70899_c0_g1_i7	EDP06664	2.2e-13	Flagellar associated protein [Source:UniProtKB/TrEMBL;Acc:A8I7W0]
TRINITY_DN70899_c0_g2	1027	826	-1.24224	1.39132e-05	1040	834	-1.24688	0.000113458	B	TRINITY_DN70899_c0_g2_i1	XP_009797402.1	1.2e-17	PREDICTED: uncharacterized protein LOC104243826 isoform X2 [Nicotiana sylvestris]					TRINITY_DN70899_c0_g2_i1	AT1G65900.2	8.35e-15	At1g65900/F12P19_7 [Source:UniProtKB/TrEMBL;Acc:Q94A98]	TRINITY_DN70899_c0_g2_i5	EDP06664	2.2e-14	Flagellar associated protein [Source:UniProtKB/TrEMBL;Acc:A8I7W0]
TRINITY_DN71007_c0_g1	48150	51446	1.068	0.0220039	48746	51901	1.065	0.0252336	B	TRINITY_DN71007_c0_g1_i8	ALR69571.1	2.72e-117	ribulose-1,5-bisphosphate carboxylase/oxygenase subunit, partial [Euglena hiemalis]	TRINITY_DN71007_c0_g1_i8	P16881.1	8.72e-116	RecName: Full=Ribulose bisphosphate carboxylase small chains, chloroplastic; Short=RuBisCO small subunits; Contains: RecName: Full=Ribulose bisphosphate carboxylase small chain P1, chloroplastic; Contains: RecName: Full=Ribulose bisphosphate carboxylase s	TRINITY_DN71007_c0_g1_i1	AT1G67090.1	2.27e-37	Ribulose bisphosphate carboxylase small chain [Source:UniProtKB/TrEMBL;Acc:A0A178WD57]	TRINITY_DN71007_c0_g1_i4	EDO96901	2.9e-48	Ribulose bisphosphate carboxylase small chain [Source:UniProtKB/TrEMBL;Acc:A8JGP5]	TRINITY_DN71007_c0_g1_i4	BAA10192	8.25e-28	ribulose bisphosphate carboxylase small subunit
TRINITY_DN71042_c0_g2	457	535	1.171	0.00583676	463	539	1.166	0.0085481	B
TRINITY_DN71074_c0_g3	167	217	1.301	0.00454251	169	219	1.296	0.00171625	B	TRINITY_DN71074_c0_g3_i1	BAD20738.1	2.8e-28	putative alpha subunit of photoactivated adenylyl cyclase [Eutreptiella gymnastica]	TRINITY_DN71074_c0_g3_i1	Q76L34.1	4.59e-28	RecName: Full=Photoactivated adenylate cyclase subunit alpha; AltName: Full=Photoactivated adenylyl cyclase subunit alpha
TRINITY_DN71107_c3_g1	108	73	-1.46843	0.0097768	109	74	-1.47275	0.00580814	B	TRINITY_DN71107_c3_g1_i9	KOO53615.1	8.39e-07	ADP-ribosyltransferase 1 precursor [Chrysochromulina sp. CCMP291]
TRINITY_DN71224_c1_g5	108	62	-1.76991	0.000333903	110	62	-1.77305	0.00050605	B
TRINITY_DN71260_c7_g1	224	290	1.296	0.0261468	227	293	1.291	0.0271242	B
TRINITY_DN71296_c0_g1	181	122	-1.48148	9.29231e-05	183	123	-1.48588	2.65847e-05	B	TRINITY_DN71296_c0_g1_i3	XP_005644411.1	2.56e-18	hypothetical protein COCSUDRAFT_25550 [Coccomyxa subellipsoidea C-169]									TRINITY_DN71296_c0_g1_i3	EDP09007	2.89e-17	Predicted protein [Source:UniProtKB/TrEMBL;Acc:A8HSU1]
TRINITY_DN71303_c0_g1	9547	10533	1.103	0.000196992	9664	10627	1.099	0.00203674	B	TRINITY_DN71303_c0_g1_i2	XP_019162420.1	6.78e-26	PREDICTED: 40S ribosomal protein S6 [Ipomoea nil]	TRINITY_DN71303_c0_g1_i2	Q9M3V8.1	1.19e-26	RecName: Full=40S ribosomal protein S6	TRINITY_DN71303_c0_g1_i2	AT5G10360.2	5.67e-28	40S ribosomal protein S6 [Source:UniProtKB/TrEMBL;Acc:A0A178USM6]	TRINITY_DN71303_c0_g1_i2	EDP01810	3.39e-20	40S ribosomal protein S6 [Source:UniProtKB/TrEMBL;Acc:A8J1G8]					TRINITY_DN71303_c0_g1_i2	ENSP00000369743.1	1.6e-21	ribosomal protein S6 [Source:HGNC Symbol;Acc:HGNC:10429]	TRINITY_DN71303_c0_g1_i2	EAN77347	1.11e-23	40S ribosomal protein S6, putative
TRINITY_DN71349_c0_g1	455	363	-1.25156	0.0030521	461	367	-1.25628	0.00503724	B	TRINITY_DN71349_c0_g1_i1	KQJ98101.1	2.9e-15	hypothetical protein BRADI_3g34890 [Brachypodium distachyon]	TRINITY_DN71349_c0_g1_i1	Q6YW62.2	2.17e-16	RecName: Full=ABC transporter G family member 44; Short=OsABCG44; AltName: Full=Pleiotropic drug resistance protein 17; Short=OsPDR17	TRINITY_DN71349_c0_g1_i1	AT2G29940.1	1.49e-11	ABC transporter G family member 31 [Source:UniProtKB/Swiss-Prot;Acc:Q7PC88]	TRINITY_DN71349_c0_g1_i1	EDP04156	9.9e-17	Predicted protein [Source:UniProtKB/TrEMBL;Acc:A8IT35]
TRINITY_DN71497_c5_g1	362	446	1.23	0.000180144	367	450	1.226	0.000103998	B	TRINITY_DN71497_c5_g1_i6	ABK06426.1	2e-59	HA-tagged protein kinase domain of putative mitogen-activated protein kinase kinase kinase [synthetic construct]	TRINITY_DN71497_c5_g1_i2	O22040.2	6.12e-59	RecName: Full=Mitogen-activated protein kinase kinase kinase ANP1; AltName: Full=Arabidopsis NPK1-related kinase 1	TRINITY_DN71497_c5_g1_i2	AT1G09000.2	3.12e-60	Mitogen-activated protein kinase kinase kinase ANP1 [Source:UniProtKB/Swiss-Prot;Acc:O22040]	TRINITY_DN71497_c5_g1_i2	EDP07929	1.85e-49	Predicted protein [Source:UniProtKB/TrEMBL;Acc:A8I1H8]	TRINITY_DN71497_c5_g1_i2	BAA18552	4.37e-16	serine/threonine protein kinase	TRINITY_DN71497_c5_g1_i2	ENSP00000365004.3	1.77e-39	mitogen-activated protein kinase kinase kinase 19 [Source:HGNC Symbol;Acc:HGNC:26249]	TRINITY_DN71497_c5_g1_i1	AAZ12586	8.82e-50	protein kinase, putative
TRINITY_DN71498_c1_g1	2121	2300	1.084	0.0224209	2148	2320	1.08	0.0485251	B	TRINITY_DN71498_c1_g1_i1	NP_187595.1	0	cell division cycle 48 [Arabidopsis thaliana]	TRINITY_DN71498_c1_g1_i1	P54609.1	0	RecName: Full=Cell division control protein 48 homolog A; Short=AtCDC48a	TRINITY_DN71498_c1_g1_i1	AT3G09840.1	0	AT3G09840 protein [Source:UniProtKB/TrEMBL;Acc:B9DI55]	TRINITY_DN71498_c1_g1_i1	EDP08480	0	Flagellar associated protein [Source:UniProtKB/TrEMBL;Acc:A8HW56]	TRINITY_DN71498_c1_g1_i1	BAA17477	1.62e-58	cell division protein; FtsH	TRINITY_DN71498_c1_g1_i1	ENSP00000351777.6	0	valosin containing protein [Source:HGNC Symbol;Acc:HGNC:12666]	TRINITY_DN71498_c1_g1_i1	EAN77993	0	valosin-containing protein homolog
TRINITY_DN71522_c0_g1	9612	10346	1.076	0.00786552	9731	10437	1.072	0.0293992	B	TRINITY_DN71522_c0_g1_i1	KXZ56375.1	2.91e-34	hypothetical protein GPECTOR_1g332 [Gonium pectorale]	TRINITY_DN71522_c0_g1_i6	P11718.2	2.6e-19	RecName: Full=Probable proton ATPase 1A; AltName: Full=LdH1A					TRINITY_DN71522_c0_g1_i2	EDP06054	8.18e-30	Plasma membrane ATPase [Source:UniProtKB/TrEMBL;Acc:A8IFK0]									TRINITY_DN71522_c0_g1_i2	EAN78627	1.62e-24	P-type H+-ATPase, putative
TRINITY_DN71601_c4_g1	119	78	-1.5361	0.0325669	121	78	-1.54083	0.0299135	B
TRINITY_DN71617_c0_g1	492	412	-1.1919	0.00355333	498	416	-1.1976	0.00332124	B	TRINITY_DN71617_c0_g1_i13	KPL80794.1	1.15e-41	hypothetical protein ADN01_11085 [Levilinea saccharolytica]	TRINITY_DN71617_c0_g1_i13	Q54YZ9.2	5.38e-30	RecName: Full=Hybrid signal transduction histidine kinase J	TRINITY_DN71617_c0_g1_i11	AT1G27320.1	2.02e-29	HK3 [Source:UniProtKB/TrEMBL;Acc:A0A178WL02]	TRINITY_DN71617_c0_g1_i13	EDP06651	1.64e-25	Predicted protein [Source:UniProtKB/TrEMBL;Acc:A8IAL5]	TRINITY_DN71617_c0_g1_i13	BAA17056	1.39e-32	hybrid sensory kinase
TRINITY_DN71638_c0_g2	1464	1606	1.097	0.0284099	1482	1620	1.093	0.0495446	B					TRINITY_DN71638_c0_g2_i1	P0A420.2	6.03e-07	RecName: Full=Photosystem I reaction center subunit II; AltName: Full=Photosystem I 16 kDa polypeptide; Short=PSI-D									TRINITY_DN71638_c0_g2_i1	BAA16688	5.02e-06	photosystem I subunit II
TRINITY_DN71658_c3_g1	136	84	-1.60514	5.55516e-06	138	85	-1.60772	1.84886e-07	B
TRINITY_DN71690_c2_g1	107	72	-1.47059	0.0105554	108	74	-1.47493	0.00678091	B
TRINITY_DN71793_c5_g1	113	155	1.376	0.00284765	114	157	1.371	0.000560866	B	TRINITY_DN71793_c5_g1_i11	KHN22782.1	1.89e-25	hypothetical protein glysoja_026750, partial [Glycine soja]					TRINITY_DN71793_c5_g1_i11	AT5G01710.1	1.96e-27	Methyltransferase [Source:UniProtKB/TrEMBL;Acc:Q9M005]
TRINITY_DN71809_c1_g1	910	429	-2.11864	4.3108e-14	922	433	-2.12766	2.08309e-21	B
TRINITY_DN71815_c1_g1	787	686	-1.14679	0.00201865	797	693	-1.15075	0.00233141	B	TRINITY_DN71815_c1_g1_i7	OEU21909.1	1.33e-17	kinase-like protein, partial [Fragilariopsis cylindrus CCMP1102]	TRINITY_DN71815_c1_g1_i7	Q8BZN4.2	5.86e-17	RecName: Full=NUAK family SNF1-like kinase 2; AltName: Full=Omphalocele kinase 2	TRINITY_DN71815_c1_g1_i4	AT5G04510.3	3.03e-15	3-phosphoinositide-dependent protein kinase 1 [Source:UniProtKB/Swiss-Prot;Acc:Q9XF67]	TRINITY_DN71815_c1_g1_i6	EDP05768	8.41e-20	NIMA-related kinase 5 [Source:UniProtKB/TrEMBL;Acc:Q6UPR1]					TRINITY_DN71815_c1_g1_i6	ENSP00000403527.1	2.76e-17	serine/threonine kinase 36 [Source:HGNC Symbol;Acc:HGNC:17209]	TRINITY_DN71815_c1_g1_i7	AAZ12729	1.91e-15	protein kinase, putative
TRINITY_DN71903_c0_g1	121	75	-1.61031	0.000135003	122	76	-1.6129	4.03333e-05	B	TRINITY_DN71903_c0_g1_i2	PCJ13160.1	1.26e-08	hypothetical protein COA98_03345, partial [Candidatus Marinimicrobia bacterium]
TRINITY_DN71914_c1_g9	237	157	-1.51057	0.00029569	240	158	-1.51745	0.000498522	B	TRINITY_DN71914_c1_g9_i3	XP_001309935.1	1.95e-06	MIZ zinc finger family protein [Trichomonas vaginalis G3]	TRINITY_DN71914_c1_g9_i3	F4JYG0.1	1.01e-06	RecName: Full=E4 SUMO-protein ligase PIAL2; AltName: Full=Protein INHIBITOR OF ACTIVATED STAT-LIKE 2	TRINITY_DN71914_c1_g9_i3	AT5G41580.1	1.2e-07	E4 SUMO-protein ligase PIAL2 [Source:UniProtKB/Swiss-Prot;Acc:F4JYG0]													TRINITY_DN71914_c1_g9_i3	EAN77053	5.69e-06	hypothetical protein, conserved
TRINITY_DN71915_c1_g3	164	209	1.27	0.0110869	167	211	1.265	0.00193326	B	TRINITY_DN71915_c1_g3_i10	XP_004340646.1	8.03e-17	vacuolar sorting protein 9 (vps9) domain containing protein [Acanthamoeba castellanii str. Neff]
TRINITY_DN71962_c0_g1	229	289	1.264	0.00528448	232	292	1.26	0.00243561	B	TRINITY_DN71962_c0_g1_i6	CUG91121.1	5.08e-35	Hypothetical protein, putative [Bodo saltans]	TRINITY_DN71962_c0_g1_i6	Q8IYG6.1	2.22e-06	RecName: Full=Leucine-rich repeat-containing protein 56													TRINITY_DN71962_c0_g1_i6	ENSP00000477831.1	4.77e-07	leucine rich repeat containing 56 [Source:HGNC Symbol;Acc:HGNC:25430]	TRINITY_DN71962_c0_g1_i5	EAN79209	3.2e-07	hypothetical protein, conserved
TRINITY_DN71985_c3_g1	381	562	1.474	9.39976e-15	386	566	1.469	4.96669e-13	B	TRINITY_DN71985_c3_g1_i17	GAX78015.1	9.2e-60	hypothetical protein CEUSTIGMA_g5457.t1 [Chlamydomonas eustigma]									TRINITY_DN71985_c3_g1_i17	EDO99959	6.7e-13	Predicted protein [Source:UniProtKB/TrEMBL;Acc:A8J8D8]
TRINITY_DN71997_c0_g3	126	169	1.339	0.014093	128	170	1.334	0.00600767	B
TRINITY_DN72020_c1_g1	662	545	-1.21803	0.0107072	671	550	-1.221	0.0182901	B
TRINITY_DN72028_c4_g1	283	209	-1.35501	0.000950853	287	211	-1.36054	0.00080726	B
TRINITY_DN72064_c2_g1	11380	12212	1.073	0.0120233	11520	12320	1.069	0.0311246	B	TRINITY_DN72064_c2_g1_i2	KNH08319.1	0	ATPase beta subunit [Perkinsela sp. CCAP 1560/4]	TRINITY_DN72064_c2_g1_i3	P38482.1	0	RecName: Full=ATP synthase subunit beta, mitochondrial; Flags: Precursor	TRINITY_DN72064_c2_g1_i3	AT5G08690.1	0	ATP synthase subunit beta-2, mitochondrial [Source:UniProtKB/Swiss-Prot;Acc:P83484]	TRINITY_DN72064_c2_g1_i3	EDP04740	0	ATP synthase subunit beta [Source:UniProtKB/TrEMBL;Acc:A8IQU3]	TRINITY_DN72064_c2_g1_i3	BAA18087	8.97e-178	ATP synthase b subunit	TRINITY_DN72064_c2_g1_i3	ENSP00000262030.3	0	ATP synthase, H+ transporting, mitochondrial F1 complex, beta polypeptide [Source:HGNC Symbol;Acc:HGNC:830]	TRINITY_DN72064_c2_g1_i2	AAZ10173	0	ATP synthase beta chain, mitochondrial precursor
TRINITY_DN72089_c1_g1	1501	1091	-1.37552	6.57794e-05	1520	1100	-1.38122	4.59429e-08	B
TRINITY_DN72102_c1_g3	121	86	-1.41443	0.00404474	123	86	-1.42045	0.000578223	B
TRINITY_DN72167_c0_g1	151	114	-1.33333	0.0147197	153	114	-1.33869	0.00482828	B
TRINITY_DN72200_c2_g1	735	861	1.171	0.00353614	744	869	1.167	0.0078972	B	TRINITY_DN72200_c2_g1_i6	P14963.1	6.88e-19	RecName: Full=Elongation factor 1-alpha; Short=EF-1-alpha	TRINITY_DN72200_c2_g1_i6	P14963.1	2.43e-21	RecName: Full=Elongation factor 1-alpha; Short=EF-1-alpha	TRINITY_DN72200_c2_g1_i8	AT1G07930.1	4.86e-18	Elongation factor 1-alpha 4 [Source:UniProtKB/Swiss-Prot;Acc:Q8GTY0]	TRINITY_DN72200_c2_g1_i8	EDP08545	6.43e-07	Eukaryotic translation elongation factor 1 alpha 1 [Source:UniProtKB/TrEMBL;Acc:A8HX38]					TRINITY_DN72200_c2_g1_i8	ENSP00000217182.3	7.24e-20	eukaryotic translation elongation factor 1 alpha 2 [Source:HGNC Symbol;Acc:HGNC:3192]	TRINITY_DN72200_c2_g1_i8	EAN77638	2.11e-20	elongation factor 1-alpha
TRINITY_DN72212_c2_g1	1010	870	-1.16009	0.00121882	1023	878	-1.1655	0.00276879	B	TRINITY_DN72212_c2_g1_i9	APW47236.1	3.53e-79	hypothetical protein RA876_13720 [Rhodoferax antarcticus]	TRINITY_DN72212_c2_g1_i9	P77234.2	2.55e-43	RecName: Full=Sel1-repeat-containing protein YbeQ	TRINITY_DN72212_c2_g1_i9	AT1G70590.1	1.95e-25	F-box protein At1g70590 [Source:UniProtKB/Swiss-Prot;Acc:Q94C27]	TRINITY_DN72212_c2_g1_i9	EDP03170	5.91e-23	Sel-1 like protein [Source:UniProtKB/TrEMBL;Acc:A8IWV3]					TRINITY_DN72212_c2_g1_i9	ENSP00000337053.4	5.18e-32	SEL1L ERAD E3 ligase adaptor subunit [Source:HGNC Symbol;Acc:HGNC:10717]	TRINITY_DN72212_c2_g1_i9	AAZ12895	4.65e-17	hypothetical protein, conserved
TRINITY_DN72228_c1_g1	629	763	1.211	2.58202e-06	637	769	1.207	1.01506e-05	B
TRINITY_DN72349_c0_g1	238	289	1.212	0.0207052	241	292	1.208	0.0066434	B	TRINITY_DN72349_c0_g1_i6	XP_002112251.1	1.32e-57	hypothetical protein TRIADDRAFT_24343 [Trichoplax adhaerens]	TRINITY_DN72349_c0_g1_i6	Q922Q5.1	1.01e-51	RecName: Full=Adenosine 3'-phospho 5'-phosphosulfate transporter 2; AltName: Full=PAPS transporter 2; AltName: Full=Solute carrier family 35 member B3	TRINITY_DN72349_c0_g1_i6	AT4G23010.1	6.09e-32	UDP-galactose transporter 2 [Source:TAIR;Acc:AT4G23010]	TRINITY_DN72349_c0_g1_i6	EDP06667	9.76e-20	Predicted protein [Source:UniProtKB/TrEMBL;Acc:A8I7Y4]					TRINITY_DN72349_c0_g1_i6	ENSP00000368981.4	7.78e-51	solute carrier family 35 member B3 [Source:HGNC Symbol;Acc:HGNC:21601]
TRINITY_DN72432_c1_g1	5737	6610	1.152	9.69253e-09	5808	6669	1.148	8.01585e-07	B	TRINITY_DN72432_c1_g1_i2	WP_030365607.1	8.27e-32	NAD(P)-dependent alcohol dehydrogenase [Streptomyces roseoverticillatus]	TRINITY_DN72432_c1_g1_i2	P0A4X1.1	6.77e-30	RecName: Full=NADP-dependent alcohol dehydrogenase C	TRINITY_DN72432_c1_g1_i2	AT4G37990.1	3.12e-26	Cinnamyl alcohol dehydrogenase 8 [Source:UniProtKB/Swiss-Prot;Acc:Q02972]	TRINITY_DN72432_c1_g1_i2	EDP03334	1.93e-28	Predicted protein [Source:UniProtKB/TrEMBL;Acc:A8IX35]	TRINITY_DN72432_c1_g1_i2	BAA18840	5.64e-16	zinc-containing alcohol dehydrogenase family	TRINITY_DN72432_c1_g1_i2	ENSP00000421556.1	2.49e-11	alcohol dehydrogenase 5 (class III), chi polypeptide [Source:HGNC Symbol;Acc:HGNC:253]	TRINITY_DN72432_c1_g1_i2	AAZ10530	3.51e-06	oxidoreductase, putative
TRINITY_DN72449_c0_g1	443	354	-1.25313	0.00594932	448	357	-1.25786	0.00874398	B	TRINITY_DN72449_c0_g1_i1	ORC90577.1	2.75e-51	hypothetical protein TM35_000083750 [Trypanosoma theileri]	TRINITY_DN72449_c0_g1_i1	P90648.1	6.82e-29	RecName: Full=Myosin heavy chain kinase B; Short=MHCK-B	TRINITY_DN72449_c0_g1_i1	AT5G49200.1	6.72e-17	Zinc finger CCCH domain-containing protein 62 [Source:UniProtKB/Swiss-Prot;Acc:Q9FE91]	TRINITY_DN72449_c0_g1_i1	EDP05939	5.78e-31	Predicted protein [Source:UniProtKB/TrEMBL;Acc:A8IDM5]	TRINITY_DN72449_c0_g1_i1	BAD02046	6.86e-13	WD-repeat protein	TRINITY_DN72449_c0_g1_i1	ENSP00000296555.4	1.19e-21	F-box and WD repeat domain containing 7 [Source:HGNC Symbol;Acc:HGNC:16712]	TRINITY_DN72449_c0_g1_i1	EAN78563	5.14e-50	hypothetical protein, conserved
TRINITY_DN72452_c1_g3	848	952	1.123	0.0158268	858	960	1.119	0.0244803	B	TRINITY_DN72452_c1_g3_i1	XP_002508621.1	2.99e-55	predicted protein [Micromonas commoda]	TRINITY_DN72452_c1_g3_i1	Q9LX31.1	7.84e-33	RecName: Full=Tetrapyrrole-binding protein, chloroplastic; AltName: Full=Genomes uncoupled 4; Flags: Precursor	TRINITY_DN72452_c1_g3_i1	AT3G59400.1	9.26e-34	Tetrapyrrole-binding protein, chloroplastic [Source:UniProtKB/Swiss-Prot;Acc:Q9LX31]	TRINITY_DN72452_c1_g3_i1	EDP07013	1.97e-51	Tetrapyrrole-binding protein [Source:UniProtKB/TrEMBL;Acc:A8I5N5]	TRINITY_DN72452_c1_g3_i1	BAA16582	4.04e-33
TRINITY_DN72529_c5_g4	9589	10348	1.079	0.0157304	9706	10440	1.075	0.0356301	B	TRINITY_DN72529_c5_g4_i5	BAO53976.1	4.62e-140	peroxiredoxin [Euglena gracilis]	TRINITY_DN72529_c5_g4_i5	P32119.5	2.92e-97	RecName: Full=Peroxiredoxin-2; AltName: Full=Natural killer cell-enhancing factor B; Short=NKEF-B; AltName: Full=PRP; AltName: Full=Thiol-specific antioxidant protein; Short=TSA; AltName: Full=Thioredoxin peroxidase 1; AltName: Full=Thioredoxin-dependent	TRINITY_DN72529_c5_g4_i5	AT3G11630.1	1.42e-78	2-Cys peroxiredoxin BAS1, chloroplastic [Source:UniProtKB/Swiss-Prot;Acc:Q96291]	TRINITY_DN72529_c5_g4_i5	EDP07356	5.75e-98	2-cys peroxiredoxin [Source:UniProtKB/TrEMBL;Acc:A8I2V3]	TRINITY_DN72529_c5_g4_i5	BAA10136	8.82e-77	thiol-specific antioxidant protein	TRINITY_DN72529_c5_g4_i5	ENSP00000301522.2	6.39e-98	peroxiredoxin 2 [Source:HGNC Symbol;Acc:HGNC:9353]	TRINITY_DN72529_c5_g4_i5	EAN76639	4.76e-93	tryparedoxin peroxidase
TRINITY_DN72583_c0_g1	7826	8570	1.095	0.000154674	7924	8645	1.091	0.00332674	B	TRINITY_DN72583_c0_g1_i1	XP_014123059.1	1.89e-53	PREDICTED: electron transfer flavoprotein subunit alpha, mitochondrial [Zonotrichia albicollis]	TRINITY_DN72583_c0_g1_i1	Q93615.2	1.61e-53	RecName: Full=Probable electron transfer flavoprotein subunit alpha, mitochondrial; Short=Alpha-ETF; Flags: Precursor	TRINITY_DN72583_c0_g1_i1	AT1G50940.1	9.81e-47	Electron transfer flavoprotein subunit alpha, mitochondrial [Source:UniProtKB/Swiss-Prot;Acc:Q9C6I6]	TRINITY_DN72583_c0_g1_i1	EDP04450	7.48e-47	Electron transfer flavoprotein alpha subunit [Source:UniProtKB/TrEMBL;Acc:A8ISG1]					TRINITY_DN72583_c0_g1_i1	ENSP00000452659.1	2.19e-54	electron transfer flavoprotein alpha subunit [Source:HGNC Symbol;Acc:HGNC:3481]	TRINITY_DN72583_c0_g1_i1	EAN79729	3.2e-46	electron-transfer-flavoprotein, alpha polypeptide, putative
TRINITY_DN72621_c1_g1	584	487	-1.20048	0.000520788	591	491	-1.20482	0.000718638	B	TRINITY_DN72621_c1_g1_i12	EWM23485.1	2.88e-16	Heat shock protein Hsp20 [Nannochloropsis gaditana]									TRINITY_DN72621_c1_g1_i2	EDP10019	5.86e-06	Heat shock protein 22F [Source:UniProtKB/TrEMBL;Acc:A8HNU7]
TRINITY_DN72667_c0_g1	107	75	-1.4245	0.0131679	108	76	-1.42857	0.00589035	B	TRINITY_DN72667_c0_g1_i17	KNH07431.1	2.34e-10	hypothetical protein XU18_1963 [Perkinsela sp. CCAP 1560/4]
TRINITY_DN72694_c1_g2	452	306	-1.47493	3.28411e-07	458	309	-1.48148	3.51901e-06	B
TRINITY_DN72763_c2_g4	127	86	-1.47929	0.0486091	129	86	-1.48368	0.0453733	B	TRINITY_DN72763_c2_g4_i3	KOO53615.1	2.25e-15	ADP-ribosyltransferase 1 precursor [Chrysochromulina sp. CCMP291]	TRINITY_DN72763_c2_g4_i6	A3UNN4.1	4.33e-08	RecName: Full=Putative NAD(+)--arginine ADP-ribosyltransferase Vis; AltName: Full=Putative mono(ADP-ribosyl)transferase; Short=mADPRT; Short=mART; AltName: Full=Toxin Vis; Flags: Precursor
TRINITY_DN72786_c4_g3	891	996	1.118	0.0126431	902	1005	1.114	0.0272858	B
TRINITY_DN72825_c1_g1	105	71	-1.47929	0.0457557	107	72	-1.48368	0.0371757	B
TRINITY_DN72836_c0_g1	157	95	-1.65837	0.000360266	160	95	-1.66667	0.00052406	B
TRINITY_DN72860_c0_g2	319	267	-1.19474	0.0265035	323	270	-1.19904	0.0101869	B	TRINITY_DN72860_c0_g2_i1	WP_055398090.1	3.75e-09	right-handed parallel beta-helix repeat-containing protein [Acidovorax sp. SD340]
TRINITY_DN72861_c2_g2	256	317	1.238	0.00359059	259	320	1.234	0.00133863	B	TRINITY_DN72861_c2_g2_i2	XP_021756452.1	4.33e-19	signal recognition particle 9 kDa protein [Chenopodium quinoa]	TRINITY_DN72861_c2_g2_i2	O04438.1	1.12e-19	RecName: Full=Signal recognition particle 9 kDa protein; Short=SRP9	TRINITY_DN72861_c2_g2_i2	AT3G49100.1	2.6e-20	Signal recognition particle 9 kDa protein [Source:UniProtKB/TrEMBL;Acc:A0A178VCR3]	TRINITY_DN72861_c2_g2_i2	EDP03033	2.69e-18	Subunit of the signal recognition particle [Source:UniProtKB/TrEMBL;Acc:A8IY91]					TRINITY_DN72861_c2_g2_i2	ENSP00000305230.7	2.47e-13	signal recognition particle 9 [Source:HGNC Symbol;Acc:HGNC:11304]
TRINITY_DN72868_c0_g1	104	77	-1.35318	0.0377262	106	78	-1.35685	0.011541	B
TRINITY_DN73032_c1_g1	4716	6943	1.472	9.14623e-33	4774	7005	1.467	3.43084e-26	B	TRINITY_DN73032_c1_g1_i5	EJY65597.1	1.18e-20	hypothetical protein OXYTRI_14248 (macronuclear) [Oxytricha trifallax]
TRINITY_DN73054_c9_g1	1011	1164	1.152	0.0258473	1023	1175	1.148	0.0431944	B
TRINITY_DN73056_c5_g4	117	65	-1.81159	3.71228e-06	119	66	-1.81488	3.30162e-06	B
TRINITY_DN73058_c0_g1	205	275	1.339	0.0145576	208	278	1.333	0.022617	B	TRINITY_DN73058_c0_g1_i14	XP_005649489.1	8.27e-43	WD40 repeat-like protein [Coccomyxa subellipsoidea C-169]	TRINITY_DN73058_c0_g1_i14	Q8VBV4.1	2.8e-29	RecName: Full=F-box/WD repeat-containing protein 7; AltName: Full=F-box and WD-40 domain-containing protein 7; AltName: Full=F-box protein FBW7; AltName: Full=F-box protein Fbxw6; AltName: Full=F-box-WD40 repeat protein 6; AltName: Full=SEL-10	TRINITY_DN73058_c0_g1_i5	AT4G02730.1	1.13e-18	COMPASS-like H3K4 histone methylase component WDR5B [Source:UniProtKB/Swiss-Prot;Acc:Q9SY00]	TRINITY_DN73058_c0_g1_i14	EDP05939	5.35e-37	Predicted protein [Source:UniProtKB/TrEMBL;Acc:A8IDM5]	TRINITY_DN73058_c0_g1_i14	BAA10064	1.2e-19	beta transducin-like protein	TRINITY_DN73058_c0_g1_i14	ENSP00000377528.3	3.95e-30	F-box and WD repeat domain containing 7 [Source:HGNC Symbol;Acc:HGNC:16712]	TRINITY_DN73058_c0_g1_i14	AAZ12534	6.51e-15	hypothetical protein, conserved
TRINITY_DN7306_c0_g1	16	149	9.118	4.96188e-20	16	150	9.017	3.90192e-35	B	TRINITY_DN7306_c0_g1_i1	KWU45698.1	5.34e-127	hypothetical protein RHOSPDRAFT_32623 [Rhodotorula sp. JG-1b]	TRINITY_DN7306_c0_g1_i1	Q9P3B2.1	1.39e-07	RecName: Full=Respiratory supercomplex factor 2 homolog C1565.01
TRINITY_DN73082_c2_g3	466	306	-1.52207	0.000177437	473	310	-1.52672	1.51143e-06	B
TRINITY_DN73099_c0_g1	13828	14842	1.073	0.0258469	13998	14972	1.07	0.0472545	B	TRINITY_DN73099_c0_g1_i4	XP_018017292.1	2.15e-13	PREDICTED: amino acid transporter ANTL1-like [Hyalella azteca]	TRINITY_DN73099_c0_g1_i3	Q5R443.1	1.21e-08	RecName: Full=Sodium-coupled neutral amino acid transporter 1; AltName: Full=Amino acid transporter A1; AltName: Full=N-system amino acid transporter 2; AltName: Full=Solute carrier family 38 member 1; AltName: Full=System A amino acid transporter 1; AltN	TRINITY_DN73099_c0_g1_i4	AT2G42005.1	2.4e-09	Amino acid transporter ANTL1 [Source:UniProtKB/Swiss-Prot;Acc:F4ILY9]									TRINITY_DN73099_c0_g1_i3	ENSP00000482873.1	6.68e-09	solute carrier family 38 member 2 [Source:HGNC Symbol;Acc:HGNC:13448]
TRINITY_DN73104_c1_g1	237	290	1.222	0.0451987	240	292	1.218	0.0345399	B
TRINITY_DN73279_c2_g1	117	81	-1.44928	0.0323858	119	82	-1.4556	0.0238378	B	TRINITY_DN73279_c2_g1_i3	XP_005822138.1	2.72e-28	hypothetical protein GUITHDRAFT_80074 [Guillardia theta CCMP2712]	TRINITY_DN73279_c2_g1_i3	Q7T6X2.2	7.04e-09	RecName: Full=Putative serine/threonine-protein kinase/receptor R826; Flags: Precursor					TRINITY_DN73279_c2_g1_i3	EDP09450	2.96e-06	Predicted protein [Source:UniProtKB/TrEMBL;Acc:A8HMV9]	TRINITY_DN73279_c2_g1_i3	BAA10341	4.62e-09	phosphate-binding periplasmic protein precursor
TRINITY_DN73407_c0_g1	1713	1496	-1.14548	1.08949e-06	1735	1510	-1.14943	1.25286e-05	B	TRINITY_DN73407_c0_g1_i1	XP_005708284.1	2.95e-162	D-3-phosphoglycerate dehydrogenase [Galdieria sulphuraria]	TRINITY_DN73407_c0_g1_i1	Q54UH8.1	3.45e-151	RecName: Full=D-3-phosphoglycerate dehydrogenase; Short=3-PGDH; AltName: Full=2-oxoglutarate reductase	TRINITY_DN73407_c0_g1_i1	AT4G34200.1	8.5e-41	D-3-phosphoglycerate dehydrogenase [Source:UniProtKB/TrEMBL;Acc:A0A178UWV4]	TRINITY_DN73407_c0_g1_i1	EDP04023	3.14e-39	Predicted protein [Source:UniProtKB/TrEMBL;Acc:A8ITU6]	TRINITY_DN73407_c0_g1_i1	BAA17878	2.13e-45	phosphoglycerate dehydrogenase	TRINITY_DN73407_c0_g1_i1	ENSP00000358415.3	6.28e-50	phosphoglycerate dehydrogenase [Source:HGNC Symbol;Acc:HGNC:8923]
TRINITY_DN73412_c1_g1	2753	2985	1.084	0.00468819	2787	3012	1.081	0.0231082	B	TRINITY_DN73412_c1_g1_i5	WP_020207646.1	6.28e-35	hypothetical protein [Gilvimarinus chinensis]	TRINITY_DN73412_c1_g1_i5	Q39593.1	1.69e-19	RecName: Full=Putative sulfur deprivation response regulator					TRINITY_DN73412_c1_g1_i5	EDP00156	6.77e-21	Sulfur acclimation 1 protein [Source:UniProtKB/TrEMBL;Acc:A8J7D0]	TRINITY_DN73412_c1_g1_i5	BAA16976	3.48e-19	sulfur deprivation response regulator
TRINITY_DN73435_c0_g1	138	96	-1.43885	0.00557904	140	97	-1.443	0.0031789	B
TRINITY_DN73464_c2_g2	696	566	-1.22699	0.000106807	704	572	-1.23153	0.000379771	B
TRINITY_DN73464_c2_g4	636	533	-1.19474	0.000144599	644	538	-1.19904	0.000150548	B	TRINITY_DN73464_c2_g4_i1	OLB56480.1	9.22e-08	hypothetical protein AUI01_06465 [Ktedonobacter sp. 13_2_20CM_2_56_8]
TRINITY_DN73488_c2_g1	357	439	1.23	0.000709491	361	443	1.226	0.00104619	B
TRINITY_DN73606_c3_g2	190	145	-1.3089	0.0241189	192	146	-1.31406	0.0130886	B
TRINITY_DN73607_c1_g8	131	96	-1.36799	0.0407848	133	97	-1.37363	0.0276043	B	TRINITY_DN73607_c1_g8_i3	XP_005838453.1	1.81e-23	hypothetical protein GUITHDRAFT_61890, partial [Guillardia theta CCMP2712]	TRINITY_DN73607_c1_g8_i1	Q7T6X2.2	2.81e-06	RecName: Full=Putative serine/threonine-protein kinase/receptor R826; Flags: Precursor									TRINITY_DN73607_c1_g8_i3	BAA10341	2.52e-10	phosphate-binding periplasmic protein precursor
TRINITY_DN73714_c2_g1	229	187	-1.22399	0.0336848	232	188	-1.2285	0.00588405	B
TRINITY_DN73766_c0_g1	108	77	-1.40449	0.0323585	109	78	-1.40845	0.0191242	B
TRINITY_DN7382_c0_g1	24	131	5.34	6.29877e-33	24	132	5.304	8.21109e-32	B	TRINITY_DN7382_c0_g1_i2	KWU44524.1	3.1e-65	hypothetical protein RHOSPDRAFT_33852 [Rhodotorula sp. JG-1b]
TRINITY_DN73841_c0_g6	23	103	4.452	5.36102e-26	23	104	4.42	5.6855e-29	B	TRINITY_DN73841_c0_g6_i1	KWU47045.1	0	hypothetical protein RHOSPDRAFT_24158 [Rhodotorula sp. JG-1b]					TRINITY_DN73841_c0_g6_i1	AT3G60550.1	7.74e-07	Cyclin-U2-2 [Source:UniProtKB/Swiss-Prot;Acc:Q9M205]
TRINITY_DN73853_c2_g1	145	898	6.173	2.02107e-69	147	906	6.147	1.73915e-112	B	TRINITY_DN73853_c2_g1_i1	KWU41000.1	0	translation elongation factor [Rhodotorula sp. JG-1b]	TRINITY_DN73853_c2_g1_i1	P32186.2	0	RecName: Full=Elongation factor 1-alpha; Short=EF-1-alpha	TRINITY_DN73853_c2_g1_i1	AT1G07930.1	0	Elongation factor 1-alpha 4 [Source:UniProtKB/Swiss-Prot;Acc:Q8GTY0]	TRINITY_DN73853_c2_g1_i1	EDP08545	1.69e-91	Eukaryotic translation elongation factor 1 alpha 1 [Source:UniProtKB/TrEMBL;Acc:A8HX38]	TRINITY_DN73853_c2_g1_i1	BAA18321	1.51e-35	protein synthesis elongation factor Tu	TRINITY_DN73853_c2_g1_i1	ENSP00000330054.2	0	eukaryotic translation elongation factor 1 alpha 1 [Source:HGNC Symbol;Acc:HGNC:3189]	TRINITY_DN73853_c2_g1_i1	EAN77638	0	elongation factor 1-alpha
TRINITY_DN73853_c4_g1	8731	9644	1.104	0.00643415	8838	9730	1.101	0.0182901	B	TRINITY_DN73853_c4_g1_i2	ACO50109.1	1.64e-43	elongation factor 1 alpha, partial [Euglena longa]	TRINITY_DN73853_c4_g1_i2	P14963.1	2.35e-44	RecName: Full=Elongation factor 1-alpha; Short=EF-1-alpha	TRINITY_DN73853_c4_g1_i2	AT1G07930.1	1.03e-36	Elongation factor 1-alpha 4 [Source:UniProtKB/Swiss-Prot;Acc:Q8GTY0]	TRINITY_DN73853_c4_g1_i4	EDP08545	7.08e-12	Eukaryotic translation elongation factor 1 alpha 1 [Source:UniProtKB/TrEMBL;Acc:A8HX38]	TRINITY_DN73853_c4_g1_i4	BAA18321	3.69e-08	protein synthesis elongation factor Tu	TRINITY_DN73853_c4_g1_i3	ENSP00000479609.1	2.18e-36	eukaryotic translation elongation factor 1 alpha 1 [Source:HGNC Symbol;Acc:HGNC:3189]	TRINITY_DN73853_c4_g1_i2	EAN77636	2.7e-39	elongation factor 1-alpha
TRINITY_DN73855_c0_g1	145	69	-2.09205	7.00402e-07	147	70	-2.10084	3.56927e-06	B
TRINITY_DN73877_c5_g2	215	276	1.286	0.000455233	217	278	1.281	2.79738e-05	B	TRINITY_DN73877_c5_g2_i1	XP_001689529.1	4.99e-09	predicted protein, partial [Chlamydomonas reinhardtii]	TRINITY_DN73877_c5_g2_i2	Q9BZV1.1	2.35e-07	RecName: Full=UBX domain-containing protein 6; AltName: Full=UBX domain-containing protein 1	TRINITY_DN73877_c5_g2_i5	AT1G04850.2	1.51e-06	F13M7.16 protein [Source:UniProtKB/TrEMBL;Acc:Q9MAT3]	TRINITY_DN73877_c5_g2_i1	EDP09267	6.57e-13	Predicted protein [Source:UniProtKB/TrEMBL;Acc:A8HPZ3]					TRINITY_DN73877_c5_g2_i2	ENSP00000467206.1	6.18e-09	UBX domain protein 6 [Source:HGNC Symbol;Acc:HGNC:14928]
TRINITY_DN73897_c7_g1	5354	5789	1.081	0.000865488	5420	5841	1.078	0.0102106	B	TRINITY_DN73897_c7_g1_i4	AAO13958.1	0	Cytochrome f, partial [Euglena gracilis]	TRINITY_DN73897_c7_g1_i4	Q8GZR2.2	0	RecName: Full=Cytochrome f, chloroplastic; Flags: Precursor	TRINITY_DN73897_c7_g1_i3	ATCG00540.1	4.52e-37	Cytochrome f [Source:UniProtKB/Swiss-Prot;Acc:P56771]	TRINITY_DN73897_c7_g1_i3	DAA00904	2.32e-36	Cytochrome f [Source:UniProtKB/TrEMBL;Acc:C5HJ53]	TRINITY_DN73897_c7_g1_i3	BAA17627	6.51e-33	apocytochrome f
TRINITY_DN73897_c7_g3	538	619	1.152	0.0183377	544	625	1.148	0.0235244	B
TRINITY_DN73909_c0_g2	574	684	1.191	0.0223046	581	691	1.187	0.0368498	B
TRINITY_DN73950_c2_g2	449	354	-1.27065	1.39872e-05	455	357	-1.27389	6.58823e-06	B	TRINITY_DN73950_c2_g2_i5	OLQ02991.1	9.96e-06	hypothetical protein AK812_SmicGene14118 [Symbiodinium microadriaticum]
TRINITY_DN74014_c2_g7	55	336	6.125	4.69243e-94	55	338	6.096	9.59289e-103	B	TRINITY_DN74014_c2_g7_i1	KWU42474.1	4.54e-72	hypothetical protein RHOSPDRAFT_21132 [Rhodotorula sp. JG-1b]	TRINITY_DN74014_c2_g7_i1	Q7SFJ9.1	7.24e-45	RecName: Full=40S ribosomal protein S16	TRINITY_DN74014_c2_g7_i1	AT5G18380.1	3.52e-41	40S ribosomal protein S16-3 [Source:UniProtKB/Swiss-Prot;Acc:Q42340]	TRINITY_DN74014_c2_g7_i1	EDP08749	5.43e-41	Ribosomal protein S16 [Source:UniProtKB/TrEMBL;Acc:A8HSU7]					TRINITY_DN74014_c2_g7_i1	ENSP00000251453.2	2.66e-35	ribosomal protein S16 [Source:HGNC Symbol;Acc:HGNC:10396]	TRINITY_DN74014_c2_g7_i1	AAZ12170	3.08e-19	40S ribosomal protein S16, putative
TRINITY_DN74110_c0_g2	200	151	-1.3245	0.0358913	202	152	-1.32979	0.0256842	B	TRINITY_DN74110_c0_g2_i1	CBL36533.1	1.79e-12	Uncharacterized flavoproteins [butyrate-producing bacterium SM4/1]	TRINITY_DN74110_c0_g2_i1	Q97GC0.1	3.72e-08	RecName: Full=Flavo-diiron protein FprA2; Short=FDP 2; AltName: Full=Flavoprotein A2; AltName: Full=H(2)O-forming NADH oxidase; AltName: Full=NADH oxidase; AltName: Full=NADH:O(2) oxidoreductase									TRINITY_DN74110_c0_g2_i1	BAA18468	1.21e-07
TRINITY_DN74167_c0_g1	470	276	-1.70358	5.98068e-05	477	278	-1.7094	3.00773e-08	B	TRINITY_DN74167_c0_g1_i1	XP_004988329.1	1.43e-46	hypothetical protein PTSG_10280 [Salpingoeca rosetta]	TRINITY_DN74167_c0_g1_i1	Q7RTR2.2	3.13e-30	RecName: Full=NLR family CARD domain-containing protein 3; AltName: Full=CARD15-like protein; AltName: Full=Caterpiller protein 16.2; Short=CLR16.2; AltName: Full=NACHT, LRR and CARD domains-containing protein 3; AltName: Full=Nucleotide-binding oligomeri	TRINITY_DN74167_c0_g1_i1	AT1G10510.1	5.25e-27	Emb2004 [Source:UniProtKB/TrEMBL;Acc:Q93ZV8]	TRINITY_DN74167_c0_g1_i1	EDP09462	2.03e-24	Flagellar associated protein [Source:UniProtKB/TrEMBL;Acc:A8HMZ4]					TRINITY_DN74167_c0_g1_i1	ENSP00000482302.1	5.98e-31	NLR family CARD domain containing 3 [Source:HGNC Symbol;Acc:HGNC:29889]	TRINITY_DN74167_c0_g1_i1	AAZ12208	1.09e-20	hypothetical protein, conserved
TRINITY_DN74231_c2_g1	152	203	1.341	0.0425071	153	204	1.336	0.0373103	B
TRINITY_DN74306_c0_g2	531	621	1.17	0.00442552	538	626	1.166	0.00990742	B	TRINITY_DN74306_c0_g2_i3	XP_005650272.1	1.48e-136	sulfate permease [Coccomyxa subellipsoidea C-169]	TRINITY_DN74306_c0_g2_i6	A8J6J0.1	2.29e-117	RecName: Full=Proton/sulfate cotransporter 2	TRINITY_DN74306_c0_g2_i6	AT3G12520.3	1.31e-75	Probable sulfate transporter 4.2 [Source:UniProtKB/Swiss-Prot;Acc:Q8GYH8]	TRINITY_DN74306_c0_g2_i6	EDP00477	8.53e-119	Proton/sulfate cotransporter 2 [Source:UniProtKB/Swiss-Prot;Acc:A8J6J0]	TRINITY_DN74306_c0_g2_i6	BAA16785	1.17e-17	high affinity sulfate transporter	TRINITY_DN74306_c0_g2_i7	ENSP00000458831.1	5.38e-22	solute carrier family 26 member 11 [Source:HGNC Symbol;Acc:HGNC:14471]
TRINITY_DN74331_c7_g3	5323	5748	1.08	0.0109395	5388	5799	1.076	0.0322734	B	TRINITY_DN74331_c7_g3_i2	XP_018384738.1	2.25e-61	eukaryotic translation initiation factor 5A [Alternaria alternata]	TRINITY_DN74331_c7_g3_i2	O94083.2	9.47e-61	RecName: Full=Eukaryotic translation initiation factor 5A; Short=eIF-5A; AltName: Full=eIF-4D	TRINITY_DN74331_c7_g3_i2	AT1G13950.1	1.25e-54	Eukaryotic translation initiation factor 5A [Source:UniProtKB/TrEMBL;Acc:A0A178WBN7]	TRINITY_DN74331_c7_g3_i2	EDP07536	2.72e-51	Eukaryotic translation initiation factor 5A [Source:UniProtKB/TrEMBL;Acc:A8I297]					TRINITY_DN74331_c7_g3_i2	ENSP00000336702.7	2.59e-56	eukaryotic translation initiation factor 5A [Source:HGNC Symbol;Acc:HGNC:3300]	TRINITY_DN74331_c7_g3_i2	EAN79055	8.04e-43	eukaryotic translation initiation factor 5a, putative
TRINITY_DN74339_c4_g2	37394	40540	1.084	0.0116651	37853	40897	1.08	0.012415	B	TRINITY_DN74339_c4_g2_i1	ABY70715.1	4.93e-39	alpha-tubulin, partial [Phelipanche ramosa]	TRINITY_DN74339_c4_g2_i1	P33623.1	1.81e-38	RecName: Full=Tubulin alpha-1 chain	TRINITY_DN74339_c4_g2_i1	AT4G14960.1	9.83e-39	Tubulin alpha chain [Source:UniProtKB/TrEMBL;Acc:A0A178UXP7]	TRINITY_DN74339_c4_g2_i1	EDO96640	5.3e-38	Tubulin alpha chain [Source:UniProtKB/TrEMBL;Acc:Q540H1]					TRINITY_DN74339_c4_g2_i1	ENSP00000450268.1	5.82e-36	tubulin alpha 1a [Source:HGNC Symbol;Acc:HGNC:20766]	TRINITY_DN74339_c4_g2_i1	CAJ16360	1.31e-39	alpha tubulin
TRINITY_DN74339_c4_g3	29545	32492	1.1	0.00126567	29906	32780	1.096	0.00213465	B	TRINITY_DN74339_c4_g3_i1	AKH44449.1	2.92e-39	alpha-tubulin I, partial [Plasmodium floridense]	TRINITY_DN74339_c4_g3_i1	P09204.1	9.42e-41	RecName: Full=Tubulin alpha-1 chain	TRINITY_DN74339_c4_g3_i1	AT4G14960.2	1.21e-38	Tubulin alpha chain [Source:UniProtKB/TrEMBL;Acc:A0A178UXP7]	TRINITY_DN74339_c4_g3_i1	EDO96640	3.51e-42	Tubulin alpha chain [Source:UniProtKB/TrEMBL;Acc:Q540H1]					TRINITY_DN74339_c4_g3_i1	ENSP00000396212.1	4.12e-39	tubulin alpha 4a [Source:HGNC Symbol;Acc:HGNC:12407]	TRINITY_DN74339_c4_g3_i1	CAJ16360	3.32e-40	alpha tubulin
TRINITY_DN74339_c4_g4	13571	15004	1.106	0.00732511	13737	15139	1.102	0.0193687	B	TRINITY_DN74339_c4_g4_i1	AKH44487.1	4.25e-45	alpha-tubulin I, partial [Plasmodium hispaniolae]	TRINITY_DN74339_c4_g4_i1	P41351.1	7.39e-47	RecName: Full=Tubulin alpha chain; AltName: Full=Alpha-tubulin; Contains: RecName: Full=Detyrosinated tubulin alpha chain	TRINITY_DN74339_c4_g4_i1	AT5G19770.1	6.63e-44	Tubulin alpha chain [Source:UniProtKB/TrEMBL;Acc:A0A178UTQ9]	TRINITY_DN74339_c4_g4_i1	EDO96640	1.41e-47	Tubulin alpha chain [Source:UniProtKB/TrEMBL;Acc:Q540H1]					TRINITY_DN74339_c4_g4_i1	ENSP00000396212.1	6.04e-43	tubulin alpha 4a [Source:HGNC Symbol;Acc:HGNC:12407]	TRINITY_DN74339_c4_g4_i1	CAJ16360	6.59e-44	alpha tubulin
TRINITY_DN74339_c4_g5	13741	14892	1.084	0.00408241	13910	15024	1.08	0.0129692	B	TRINITY_DN74339_c4_g5_i3	AAD50629.1	2.35e-31	alpha-tubulin, partial [Gossypium hirsutum]	TRINITY_DN74339_c4_g5_i3	P33625.1	5.09e-32	RecName: Full=Tubulin alpha chain	TRINITY_DN74339_c4_g5_i3	AT1G64740.1	4.6e-32	Tubulin alpha-1 chain [Source:UniProtKB/Swiss-Prot;Acc:P11139]	TRINITY_DN74339_c4_g5_i3	EDO96640	4.96e-31	Tubulin alpha chain [Source:UniProtKB/TrEMBL;Acc:Q540H1]					TRINITY_DN74339_c4_g5_i3	ENSP00000318575.6	4.93e-30	tubulin alpha 8 [Source:HGNC Symbol;Acc:HGNC:12410]	TRINITY_DN74339_c4_g5_i3	CAJ16360	3.23e-33	alpha tubulin
TRINITY_DN74339_c4_g6	36787	40856	1.111	0.000419975	37239	41219	1.107	0.000750524	B	TRINITY_DN74339_c4_g6_i1	AAK37831.1	1.77e-58	alpha-tubulin [Euglena gracilis]	TRINITY_DN74339_c4_g6_i1	P33625.1	6.25e-61	RecName: Full=Tubulin alpha chain	TRINITY_DN74339_c4_g6_i1	AT1G04820.1	4.79e-55	Tubulin alpha-2 chain [Source:UniProtKB/Swiss-Prot;Acc:B9DGT7]	TRINITY_DN74339_c4_g6_i1	EDO96640	4.48e-56	Tubulin alpha chain [Source:UniProtKB/TrEMBL;Acc:Q540H1]					TRINITY_DN74339_c4_g6_i1	ENSP00000448211.1	1.93e-57	tubulin alpha 1c [Source:HGNC Symbol;Acc:HGNC:20768]	TRINITY_DN74339_c4_g6_i1	CAJ16360	4.41e-57	alpha tubulin
TRINITY_DN74339_c6_g1	23120	24947	1.079	0.0217604	23404	25168	1.075	0.0345399	B	TRINITY_DN74339_c6_g1_i1	PBJ78104.1	7.79e-36	alpha tubulin [Trypanosoma cruzi cruzi]	TRINITY_DN74339_c6_g1_i1	P33625.1	1.71e-36	RecName: Full=Tubulin alpha chain	TRINITY_DN74339_c6_g1_i1	AT4G14960.1	1.95e-36	Tubulin alpha chain [Source:UniProtKB/TrEMBL;Acc:A0A178UXP7]	TRINITY_DN74339_c6_g1_i1	EDO96640	4.62e-37	Tubulin alpha chain [Source:UniProtKB/TrEMBL;Acc:Q540H1]					TRINITY_DN74339_c6_g1_i1	ENSP00000396212.1	5.66e-35	tubulin alpha 4a [Source:HGNC Symbol;Acc:HGNC:12407]	TRINITY_DN74339_c6_g1_i1	CAJ16360	3.64e-37	alpha tubulin
TRINITY_DN74344_c0_g1	942	1165	1.236	1.48509e-09	954	1176	1.232	1.49845e-07	B	TRINITY_DN74344_c0_g1_i2	ORY87261.1	7.39e-33	RNA-binding domain-containing protein [Neocallimastix californiae]	TRINITY_DN74344_c0_g1_i2	O94432.1	4.18e-29	RecName: Full=Uncharacterized RNA-binding protein C660.15	TRINITY_DN74344_c0_g1_i2	AT5G47620.5	1.89e-29	RNA recognition motif-containing protein [Source:UniProtKB/TrEMBL;Acc:F4JYK6]	TRINITY_DN74344_c0_g1_i2	EDP05699	3.58e-30	Predicted protein [Source:UniProtKB/TrEMBL;Acc:A8IH75]	TRINITY_DN74344_c0_g1_i3	BAA17597	1.31e-06	RNA-binding protein	TRINITY_DN74344_c0_g1_i6	ENSP00000316042.4	7.07e-28	heterogeneous nuclear ribonucleoprotein A0 [Source:HGNC Symbol;Acc:HGNC:5030]	TRINITY_DN74344_c0_g1_i2	AAZ10631	3.28e-10	RNA-binding protein, putative
TRINITY_DN74363_c2_g1	398	315	-1.26103	0.00100343	403	318	-1.26582	0.0011736	B
TRINITY_DN74408_c2_g1	172	126	-1.3587	0.0113827	174	128	-1.36426	0.006286	B	TRINITY_DN74408_c2_g1_i1	OEU43701.1	2.01e-43	hypothetical protein BGV40_02705 [Methanosarcina sp. Ant1]	TRINITY_DN74408_c2_g1_i1	Q6AZT7.1	4.05e-21	RecName: Full=Nephrocystin-3	TRINITY_DN74408_c2_g1_i1	AT4G10840.1	7.17e-14	Protein KINESIN LIGHT CHAIN-RELATED 1 [Source:UniProtKB/Swiss-Prot;Acc:O81629]	TRINITY_DN74408_c2_g1_i1	EDO99710	3.66e-15	Predicted protein [Source:UniProtKB/TrEMBL;Acc:A8J8G3]	TRINITY_DN74408_c2_g1_i1	BAA10838	7.12e-13		TRINITY_DN74408_c2_g1_i1	ENSP00000338766.5	2.01e-19	nephrocystin 3 [Source:HGNC Symbol;Acc:HGNC:7907]	TRINITY_DN74408_c2_g1_i1	AAZ10719	2.71e-12	hypothetical protein, conserved
TRINITY_DN74469_c3_g1	1007	1164	1.155	0.000820579	1020	1174	1.151	0.00235951	B	TRINITY_DN74469_c3_g1_i1	AAQ24862.1	8.34e-21	heat shock protein 90, partial [Euglena gracilis]	TRINITY_DN74469_c3_g1_i1	P24724.2	3.12e-17	RecName: Full=Heat shock protein 90; Short=HSP90	TRINITY_DN74469_c3_g1_i1	AT5G56030.2	1.07e-17	Heat shock protein 81-2 [Source:UniProtKB/TrEMBL;Acc:F4K6B6]	TRINITY_DN74469_c3_g1_i1	EDP01972	1.77e-17	Heat shock protein 90A [Source:UniProtKB/TrEMBL;Acc:A8J1U1]					TRINITY_DN74469_c3_g1_i1	ENSP00000216281.7	2.78e-15	heat shock protein 90 alpha family class A member 1 [Source:HGNC Symbol;Acc:HGNC:5253]	TRINITY_DN74469_c3_g1_i1	EAN78479	1.03e-15	heat shock protein 83
TRINITY_DN74494_c1_g4	1433	1301	-1.10254	0.020963	1451	1312	-1.10619	0.0254858	B
TRINITY_DN74512_c0_g1	136	98	-1.38313	0.0332325	138	99	-1.38889	0.0221035	B	TRINITY_DN74512_c0_g1_i12	OWF47811.1	5.83e-28	Mucin-22 [Mizuhopecten yessoensis]	TRINITY_DN74512_c0_g1_i5	A5WUY6.1	5.45e-13	RecName: Full=O(6)-methylguanine-induced apoptosis 2; Short=MAPO2; AltName: Full=Sperm-tail PG-rich repeat-containing protein 1																	TRINITY_DN74512_c0_g1_i5	EAN77059	4.95e-09	hypothetical protein, conserved
TRINITY_DN74517_c1_g1	15	116	7.835	5.02492e-39	15	117	7.756	8.84446e-43	B	TRINITY_DN74517_c1_g1_i1	KWU44125.1	0	mitochondrial carrier [Rhodotorula sp. JG-1b]	TRINITY_DN74517_c1_g1_i1	Q9P7V8.1	1.15e-101	RecName: Full=Probable mitochondrial phosphate carrier protein	TRINITY_DN74517_c1_g1_i1	AT5G14040.1	1.77e-95	Mitochondrial phosphate carrier protein 3, mitochondrial [Source:UniProtKB/Swiss-Prot;Acc:Q9FMU6]	TRINITY_DN74517_c1_g1_i1	EDP06152	2.6e-108	CR057 protein [Source:UniProtKB/TrEMBL;Acc:Q84X74]					TRINITY_DN74517_c1_g1_i1	ENSP00000447740.1	9.06e-79	solute carrier family 25 member 3 [Source:HGNC Symbol;Acc:HGNC:10989]	TRINITY_DN74517_c1_g1_i1	EAN76991	4.79e-75	mitochondrial carrier protein, putative
TRINITY_DN74633_c4_g1	7962	8578	1.077	0.00914549	8060	8654	1.074	0.0282227	B	TRINITY_DN74633_c4_g1_i4	XP_004352758.1	7.39e-82	sphinganine1-phosphate aldolase BST1, putative [Acanthamoeba castellanii str. Neff]	TRINITY_DN74633_c4_g1_i4	Q8R0X7.1	3.42e-63	RecName: Full=Sphingosine-1-phosphate lyase 1; Short=S1PL; Short=SP-lyase 1; Short=SPL 1; Short=mSPL; AltName: Full=Sphingosine-1-phosphate aldolase	TRINITY_DN74633_c4_g1_i4	AT1G27980.1	7.88e-47	Sphingosine-1-phosphate lyase [Source:UniProtKB/Swiss-Prot;Acc:Q9C509]	TRINITY_DN74633_c4_g1_i4	EDP00125	1.87e-17	Predicted protein [Source:UniProtKB/TrEMBL;Acc:A8J7L4]	TRINITY_DN74633_c4_g1_i4	BAA17064	1.62e-12	glutamate decarboxylase	TRINITY_DN74633_c4_g1_i4	ENSP00000362298.3	2.65e-57	sphingosine-1-phosphate lyase 1 [Source:HGNC Symbol;Acc:HGNC:10817]	TRINITY_DN74633_c4_g1_i4	AAZ11922	1.68e-63	sphingosine phosphate lyase-like protein, putative
TRINITY_DN74765_c0_g1	164	92	-1.79211	4.29028e-07	166	92	-1.79856	4.79241e-07	B
TRINITY_DN74812_c1_g2	408	332	-1.22549	0.0413428	413	336	-1.23001	0.0434911	B	TRINITY_DN74812_c1_g2_i2	BAC05484.2	1.47e-91	ascorbate peroxidase [Euglena gracilis]	TRINITY_DN74812_c1_g2_i2	Q7SDV9.1	5.19e-46	RecName: Full=Cytochrome c peroxidase, mitochondrial; Short=CCP; Flags: Precursor	TRINITY_DN74812_c1_g2_i2	AT1G07890.6	2.08e-43	MEE6 [Source:UniProtKB/TrEMBL;Acc:A0A178W5I1]	TRINITY_DN74812_c1_g2_i2	EDP00040	1e-46	Cytochrome c peroxidase [Source:UniProtKB/TrEMBL;Acc:A8J7X9]	TRINITY_DN74812_c1_g2_i2	BAA17975	1.04e-18	catalase hpi
TRINITY_DN74828_c2_g2	1219	1400	1.147	0.0176907	1234	1412	1.143	0.032424	B
TRINITY_DN74902_c4_g2	74	515	6.954	5.31589e-138	75	520	6.926	7.86339e-131	B	TRINITY_DN74902_c4_g2_i1	KWU41996.1	3.36e-111	ribosomal protein L22, partial [Rhodotorula sp. JG-1b]	TRINITY_DN74902_c4_g2_i1	P18621.3	4.44e-59	RecName: Full=60S ribosomal protein L17; AltName: Full=60S ribosomal protein L23; AltName: Full=Large ribosomal subunit protein uL22; AltName: Full=PD-1	TRINITY_DN74902_c4_g2_i1	AT1G67430.1	9.06e-53	60S ribosomal protein L17-2 [Source:UniProtKB/Swiss-Prot;Acc:P51413]	TRINITY_DN74902_c4_g2_i1	EDP08708	2.37e-56	Ribosomal protein L17 [Source:UniProtKB/TrEMBL;Acc:A8HS59]					TRINITY_DN74902_c4_g2_i1	ENSP00000463490.1	4.43e-60	ribosomal protein L17 [Source:HGNC Symbol;Acc:HGNC:10307]	TRINITY_DN74902_c4_g2_i1	EAN78825	2.56e-42	60S ribosomal protein L17, putative
TRINITY_DN74904_c7_g1	211	162	-1.2987	0.0248627	214	164	-1.30378	0.0162216	B
TRINITY_DN74916_c1_g1	20908	15283	-1.36799	0.000364969	21181	15424	-1.37363	4.10156e-07	B	TRINITY_DN74916_c1_g1_i10	AAA16605.1	1.51e-165	light harvesting chlorophyll a/b binding protein of PSII, partial [Euglena gracilis]	TRINITY_DN74916_c1_g1_i20	P07370.1	2.05e-57	RecName: Full=Chlorophyll a-b binding protein 1B, chloroplastic; AltName: Full=LHCII type I CAB-1B; Short=LHCP; Flags: Precursor	TRINITY_DN74916_c1_g1_i20	AT2G34430.1	2.88e-57	Chlorophyll a-b binding protein, chloroplastic [Source:UniProtKB/TrEMBL;Acc:Q39142]	TRINITY_DN74916_c1_g1_i20	EDP02923	7.36e-58	Chlorophyll a-b binding protein, chloroplastic [Source:UniProtKB/TrEMBL;Acc:Q93WE0]
TRINITY_DN74956_c0_g4	377	300	-1.25628	0.0288407	382	303	-1.26103	0.0304474	B
TRINITY_DN74964_c4_g1	1392	1521	1.092	0.0192382	1409	1534	1.089	0.0387821	B	TRINITY_DN74964_c4_g1_i2	OLQ00294.1	1e-63	hypothetical protein AK812_SmicGene17040 [Symbiodinium microadriaticum]
TRINITY_DN74979_c2_g2	10886	9648	-1.12867	0.0025967	11023	9734	-1.1325	0.00672247	B	TRINITY_DN74979_c2_g2_i2	AKL82342.1	0	chlorophyll biosynthesis (chloroplast) [Euglena gracilis var. bacillaris]	TRINITY_DN74979_c2_g2_i2	P31205.1	0	RecName: Full=Magnesium-chelatase subunit ChlI; AltName: Full=Mg-protoporphyrin IX chelatase	TRINITY_DN74979_c2_g2_i2	AT4G18480.1	8.05e-159	Magnesium-chelatase subunit ChlI-1, chloroplastic [Source:UniProtKB/Swiss-Prot;Acc:P16127]	TRINITY_DN74979_c2_g2_i2	EDP04965	1.74e-170	Mg-protoporphyrin IX chelatase [Source:UniProtKB/TrEMBL;Acc:A8IMZ5]	TRINITY_DN74979_c2_g2_i2	BAA17166	7.27e-169	Mg chelatase subunit; ChlI
TRINITY_DN75053_c1_g1	154	226	1.469	0.00167919	156	228	1.463	0.00279953	B
TRINITY_DN75116_c1_g1	8930	9801	1.097	7.40477e-05	9042	9888	1.094	0.0019532	B	TRINITY_DN75116_c1_g1_i4	NP_041947.1	1.87e-122	ribosomal protein S4 [Euglena gracilis]	TRINITY_DN75116_c1_g1_i4	P27418.1	6.61e-125	RecName: Full=30S ribosomal protein S4, chloroplastic	TRINITY_DN75116_c1_g1_i4	ATCG00680.1	9.34e-82	Photosystem II CP47 reaction center protein [Source:UniProtKB/TrEMBL;Acc:A0A1B1W4X0]	TRINITY_DN75116_c1_g1_i4	DAA00933	2.75e-88	Photosystem II CP47 reaction center protein [Source:UniProtKB/Swiss-Prot;Acc:P37255]	TRINITY_DN75116_c1_g1_i4	BAA10458	2.97e-85	photosystem II CP47 protein	TRINITY_DN75116_c1_g1_i5	ENSP00000363018.3	1.13e-67	ribosomal protein L10a [Source:HGNC Symbol;Acc:HGNC:10299]	TRINITY_DN75116_c1_g1_i5	EAN78722	7.86e-76	60S ribosomal protein L10a
TRINITY_DN75138_c0_g1	106	76	-1.39276	0.0232078	108	77	-1.39665	0.0103049	B
TRINITY_DN75215_c0_g1	201	114	-1.75439	5.37448e-06	203	115	-1.76056	1.75519e-05	B
TRINITY_DN75220_c5_g1	119	86	-1.38504	0.0203759	121	87	-1.38889	0.00802139	B	TRINITY_DN75220_c5_g1_i3	WP_054050449.1	2.59e-28	non-ribosomal peptide synthase [Pseudomonas sp. 655]	TRINITY_DN75220_c5_g1_i3	O30409.1	3.18e-26	RecName: Full=Tyrocidine synthase 3; AltName: Full=Tyrocidine synthase III; Includes: RecName: Full=ATP-dependent asparagine adenylase; Short=AsnA; AltName: Full=Asparagine activase; Includes: RecName: Full=ATP-dependent glutamine adenylase; Short=GlnA; A	TRINITY_DN75220_c5_g1_i8	AT5G35930.3	1.44e-08	AMP-dependent synthetase and ligase family protein [Source:TAIR;Acc:AT5G35930]
TRINITY_DN75226_c0_g2	135	97	-1.40449	0.0116261	137	98	-1.40845	0.00654336	B	TRINITY_DN75226_c0_g2_i1	EPY23337.1	9.59e-19	zinc finger protein [Angomonas deanei]	TRINITY_DN75226_c0_g2_i3	Q9QXX8.1	5.43e-08	RecName: Full=Nuclear fragile X mental retardation-interacting protein 1; AltName: Full=Nuclear FMRP-interacting protein 1													TRINITY_DN75226_c0_g2_i3	ENSP00000368459.4	9.93e-07	NUFIP1, FMR1 interacting protein 1 [Source:HGNC Symbol;Acc:HGNC:8057]	TRINITY_DN75226_c0_g2_i1	AAZ10407	3.93e-22	hypothetical protein, conserved
TRINITY_DN75288_c4_g1	272	201	-1.35318	0.000198005	276	203	-1.3587	0.000104139	B
TRINITY_DN75308_c1_g1	133	831	6.246	3.68794e-35	135	839	6.221	8.09683e-61	B	TRINITY_DN75308_c1_g1_i5	KWU43622.1	3.87e-89	ribosomal protein L14b/L23e [Rhodotorula sp. JG-1b]	TRINITY_DN75308_c1_g1_i5	P0CT60.1	1.42e-78	RecName: Full=60S ribosomal protein L23-A	TRINITY_DN75308_c1_g1_i5	AT3G04400.1	4.01e-71	At2g33370 [Source:UniProtKB/TrEMBL;Acc:Q1H559]	TRINITY_DN75308_c1_g1_i5	EDO99405	1.47e-72	Ribosomal protein L23 [Source:UniProtKB/TrEMBL;Acc:A8J9W0]	TRINITY_DN75308_c1_g1_i5	BAA17339	3.55e-16	50S ribosomal protein L14	TRINITY_DN75308_c1_g1_i5	ENSP00000420311.2	5.74e-74	ribosomal protein L23 [Source:HGNC Symbol;Acc:HGNC:10316]	TRINITY_DN75308_c1_g1_i5	EAN77077	2.2e-65	60S ribosomal protein L23, putative
TRINITY_DN75335_c0_g1	18750	20520	1.094	0.00101532	18982	20701	1.091	0.00433915	B	TRINITY_DN75335_c0_g1_i11	BAR71477.1	1.9e-122	putative 3-ketoacyl-CoA thiolase [Euglena gracilis]	TRINITY_DN75335_c0_g1_i11	P45359.1	1.1e-63	RecName: Full=Acetyl-CoA acetyltransferase; AltName: Full=Acetoacetyl-CoA thiolase	TRINITY_DN75335_c0_g1_i11	AT1G04710.1	7.4e-43	PKT4 [Source:UniProtKB/TrEMBL;Acc:A0A178W7T5]	TRINITY_DN75335_c0_g1_i11	EDP02040	4.91e-35	Predicted protein [Source:UniProtKB/TrEMBL;Acc:A8J0X4]	TRINITY_DN75335_c0_g1_i11	BAA17882	1.68e-44	acetyl coenzyme A acetyltransferase (thiolase)	TRINITY_DN75335_c0_g1_i11	ENSP00000466466.1	7.25e-56	acetyl-CoA acyltransferase 2 [Source:HGNC Symbol;Acc:HGNC:83]
TRINITY_DN75335_c0_g2	21983	24387	1.109	2.73908e-06	22255	24604	1.105	7.0464e-05	B	TRINITY_DN75335_c0_g2_i2	OQX00539.1	2.64e-23	acetyl-CoA acetyltransferase [Desulfobacteraceae bacterium IS3]	TRINITY_DN75335_c0_g2_i1	Q0KBP1.1	7.26e-12	RecName: Full=Beta-ketothiolase BktB; AltName: Full=Acetyl-CoA acetyltransferase; AltName: Full=Acetyl-CoA acyltransferase	TRINITY_DN75335_c0_g2_i2	AT5G48230.2	1.05e-09	AT5G48230 protein [Source:UniProtKB/TrEMBL;Acc:B9DGQ1]					TRINITY_DN75335_c0_g2_i1	BAA17882	3.27e-06	acetyl coenzyme A acetyltransferase (thiolase)	TRINITY_DN75335_c0_g2_i2	ENSP00000356015.4	1.41e-08	acetyl-CoA acetyltransferase 2 [Source:HGNC Symbol;Acc:HGNC:94]
TRINITY_DN75335_c0_g3	9479	10387	1.096	0.00114918	9595	10479	1.092	0.0051325	B	TRINITY_DN75335_c0_g3_i1	BAR71477.1	1.09e-31	putative 3-ketoacyl-CoA thiolase [Euglena gracilis]	TRINITY_DN75335_c0_g3_i1	Q12598.3	2.43e-13	RecName: Full=Acetyl-CoA acetyltransferase IA; AltName: Full=Peroxisomal acetoacetyl-CoA thiolase; AltName: Full=Thiolase IA	TRINITY_DN75335_c0_g3_i1	AT5G47720.5	2.7e-12	Probable acetyl-CoA acetyltransferase, cytosolic 2 [Source:UniProtKB/Swiss-Prot;Acc:Q9FIK7]	TRINITY_DN75335_c0_g3_i1	EDP02040	6.15e-14	Predicted protein [Source:UniProtKB/TrEMBL;Acc:A8J0X4]	TRINITY_DN75335_c0_g3_i1	BAA17882	7.23e-10	acetyl coenzyme A acetyltransferase (thiolase)	TRINITY_DN75335_c0_g3_i1	ENSP00000465095.1	3.06e-11	acetyl-CoA acyltransferase 2 [Source:HGNC Symbol;Acc:HGNC:83]
TRINITY_DN75356_c2_g1	2746	3005	1.094	0.0205416	2780	3031	1.091	0.0433513	B	TRINITY_DN75356_c2_g1_i2	ABF68597.1	0	chloroplast fructose-1,6-bisphosphatase [Euglena gracilis]	TRINITY_DN75356_c2_g1_i2	P22418.2	1.02e-118	RecName: Full=Fructose-1,6-bisphosphatase, chloroplastic; Short=FBPase; AltName: Full=D-fructose-1,6-bisphosphate 1-phosphohydrolase; Flags: Precursor	TRINITY_DN75356_c2_g1_i2	AT3G54050.1	1.05e-117	Fructose-1,6-bisphosphatase 1, chloroplastic [Source:UniProtKB/Swiss-Prot;Acc:P25851]	TRINITY_DN75356_c2_g1_i2	EDP05318	1.28e-116	Fructose-1,6-bisphosphatase [Source:UniProtKB/TrEMBL;Acc:A8IKQ0]	TRINITY_DN75356_c2_g1_i2	BAA18418	1.48e-78	fructose 1,6-bisphosphatase	TRINITY_DN75356_c2_g1_i2	ENSP00000408025.1	1.11e-80	fructose-bisphosphatase 1 [Source:HGNC Symbol;Acc:HGNC:3606]	TRINITY_DN75356_c2_g1_i2	EAN76866	1.01e-87	fructose-1,6-bisphosphate, cytosolic
TRINITY_DN75357_c2_g1	114	148	1.295	0.0342806	116	149	1.29	0.0124835	B
TRINITY_DN75379_c1_g1	260	212	-1.22399	0.0428504	263	214	-1.2285	0.0206748	B
TRINITY_DN75388_c2_g1	12619	13577	1.076	0.0121794	12775	13697	1.072	0.0315976	B	TRINITY_DN75388_c2_g1_i1	CUG89991.1	6.61e-32	60S ribosomal protein L34, putative [Bodo saltans]	TRINITY_DN75388_c2_g1_i10	P87262.1	1.18e-21	RecName: Full=60S ribosomal protein L34-A; AltName: Full=Large ribosomal subunit protein eL34-A	TRINITY_DN75388_c2_g1_i3	AT1G69620.1	3.36e-21	60S ribosomal protein L34-2 [Source:UniProtKB/Swiss-Prot;Acc:Q9FE65]	TRINITY_DN75388_c2_g1_i1	EDO99823	3.53e-26	Ribosomal protein L34 [Source:UniProtKB/TrEMBL;Acc:A8J8P4]					TRINITY_DN75388_c2_g1_i3	ENSP00000378163.2	7.12e-22	ribosomal protein L34 [Source:HGNC Symbol;Acc:HGNC:10340]	TRINITY_DN75388_c2_g1_i1	EAN78645	9.51e-32	60S ribosomal protein L34, putative
TRINITY_DN75425_c1_g1	140	178	1.277	0.0268378	142	180	1.272	0.0098021	B
TRINITY_DN75466_c1_g2	253	128	-1.9685	0.00465108	256	130	-1.97239	1.90804e-05	B
TRINITY_DN75486_c2_g1	328	268	-1.22249	0.00795977	332	270	-1.22699	0.00324956	B	TRINITY_DN75486_c2_g1_i1	XP_001564084.1	1.69e-84	conserved hypothetical protein [Leishmania braziliensis MHOM/BR/75/M2904]	TRINITY_DN75486_c2_g1_i1	Q3SYU1.1	2.62e-61	RecName: Full=Nucleolar complex protein 2 homolog; Short=Protein NOC2 homolog; AltName: Full=NOC2-like protein; AltName: Full=Novel INHAT repressor	TRINITY_DN75486_c2_g1_i1	AT2G18220.1	9.51e-56	Nucleolar complex protein 2 homolog [Source:UniProtKB/Swiss-Prot;Acc:Q9ZPV5]	TRINITY_DN75486_c2_g1_i1	EDP02318	4.58e-51	Predicted protein [Source:UniProtKB/TrEMBL;Acc:A8J046]					TRINITY_DN75486_c2_g1_i1	ENSP00000317992.6	2.08e-58	NOC2 like nucleolar associated transcriptional repressor [Source:HGNC Symbol;Acc:HGNC:24517]	TRINITY_DN75486_c2_g1_i1	EAN78620	3.32e-78	hypothetical protein, conserved
TRINITY_DN75507_c3_g1	270	320	1.186	0.0294754	273	323	1.181	0.0104758	B
TRINITY_DN75522_c2_g1	137	104	-1.32802	0.027123	139	104	-1.33156	0.00935266	B
TRINITY_DN75536_c3_g1	34264	38364	1.12	2.11449e-05	34686	38704	1.116	6.37415e-05	B	TRINITY_DN75536_c3_g1_i2	ALR69473.1	4.92e-106	plastid glyceraldehyde 3-phosphate dehydrogenase, partial [Euglena gracilis]	TRINITY_DN75536_c3_g1_i1	P19866.2	1.68e-22	RecName: Full=Glyceraldehyde-3-phosphate dehydrogenase A, chloroplastic; AltName: Full=NADP-dependent glyceraldehydephosphate dehydrogenase subunit A; Flags: Precursor	TRINITY_DN75536_c3_g1_i1	AT3G26650.1	7.38e-22	Glyceraldehyde-3-phosphate dehydrogenase GAPA1, chloroplastic [Source:UniProtKB/Swiss-Prot;Acc:P25856]	TRINITY_DN75536_c3_g1_i1	EDP09609	2.71e-22	Glyceraldehyde-3-phosphate dehydrogenase [Source:UniProtKB/TrEMBL;Acc:A8HP84]	TRINITY_DN75536_c3_g1_i1	BAA18633	6.08e-20	glyceraldehyde-3-phosphate dehydrogenase (NADP+) (phosphorylating)	TRINITY_DN75536_c3_g1_i1	ENSP00000467255.1	9.04e-07	glyceraldehyde-3-phosphate dehydrogenase, spermatogenic [Source:HGNC Symbol;Acc:HGNC:24864]	TRINITY_DN75536_c3_g1_i1	EAN78101	1.22e-07	glyceraldehyde 3-phosphate dehydrogenase, cytosolic
TRINITY_DN75536_c3_g2	2351	2800	1.191	3.0651e-07	2380	2824	1.186	1.01664e-05	B
TRINITY_DN75536_c3_g3	16552	18588	1.123	6.38022e-08	16756	18752	1.119	4.32511e-06	B	TRINITY_DN75536_c3_g3_i2	ALR69473.1	1.58e-113	plastid glyceraldehyde 3-phosphate dehydrogenase, partial [Euglena gracilis]	TRINITY_DN75536_c3_g3_i2	P19866.2	2.66e-71	RecName: Full=Glyceraldehyde-3-phosphate dehydrogenase A, chloroplastic; AltName: Full=NADP-dependent glyceraldehydephosphate dehydrogenase subunit A; Flags: Precursor	TRINITY_DN75536_c3_g3_i2	AT3G26650.1	2.83e-65	Glyceraldehyde-3-phosphate dehydrogenase GAPA1, chloroplastic [Source:UniProtKB/Swiss-Prot;Acc:P25856]	TRINITY_DN75536_c3_g3_i2	EDP09609	2.87e-59	Glyceraldehyde-3-phosphate dehydrogenase [Source:UniProtKB/TrEMBL;Acc:A8HP84]	TRINITY_DN75536_c3_g3_i2	BAA18633	2.85e-64	glyceraldehyde-3-phosphate dehydrogenase (NADP+) (phosphorylating)	TRINITY_DN75536_c3_g3_i2	ENSP00000222286.3	1.29e-51	glyceraldehyde-3-phosphate dehydrogenase, spermatogenic [Source:HGNC Symbol;Acc:HGNC:24864]	TRINITY_DN75536_c3_g3_i2	AAZ11988	1.2e-49	glyceraldehyde 3-phosphate dehydrogenase, glycosomal
TRINITY_DN75536_c3_g4	10094	11396	1.129	4.98855e-07	10219	11498	1.125	3.24398e-05	B	TRINITY_DN75536_c3_g4_i4	AAD10216.1	1.39e-43	glyceraldehyde-3-phosphate dehydrogenase [Euglena gracilis]	TRINITY_DN75536_c3_g4_i4	P34917.2	2.89e-29	RecName: Full=Glyceraldehyde-3-phosphate dehydrogenase 2; Short=GAPDH 2; AltName: Full=NAD(P)-dependent glyceraldehyde-3-phosphate dehydrogenase	TRINITY_DN75536_c3_g4_i4	AT1G12900.2	2.37e-27	glyceraldehyde 3-phosphate dehydrogenase A subunit 2 [Source:TAIR;Acc:AT1G12900]	TRINITY_DN75536_c3_g4_i4	EDP09609	5.07e-29	Glyceraldehyde-3-phosphate dehydrogenase [Source:UniProtKB/TrEMBL;Acc:A8HP84]	TRINITY_DN75536_c3_g4_i4	BAA18633	1.21e-30	glyceraldehyde-3-phosphate dehydrogenase (NADP+) (phosphorylating)	TRINITY_DN75536_c3_g4_i4	ENSP00000380065.1	8.87e-18	glyceraldehyde-3-phosphate dehydrogenase [Source:HGNC Symbol;Acc:HGNC:4141]	TRINITY_DN75536_c3_g4_i4	AAZ11988	4.07e-15	glyceraldehyde 3-phosphate dehydrogenase, glycosomal
TRINITY_DN75606_c0_g1	160	68	-2.35849	5.55507e-05	162	68	-2.36407	6.64188e-08	B
TRINITY_DN75666_c0_g1	117	78	-1.5083	0.00960586	119	79	-1.51286	0.00761309	B	TRINITY_DN75666_c0_g1_i15	XP_001309935.1	6.5e-09	MIZ zinc finger family protein [Trichomonas vaginalis G3]	TRINITY_DN75666_c0_g1_i15	F4JYG0.1	2.25e-08	RecName: Full=E4 SUMO-protein ligase PIAL2; AltName: Full=Protein INHIBITOR OF ACTIVATED STAT-LIKE 2	TRINITY_DN75666_c0_g1_i15	AT5G41580.1	2.66e-09	E4 SUMO-protein ligase PIAL2 [Source:UniProtKB/Swiss-Prot;Acc:F4JYG0]									TRINITY_DN75666_c0_g1_i15	ENSP00000396601.1	1.11e-07	zinc finger MIZ-type containing 2 [Source:HGNC Symbol;Acc:HGNC:22229]	TRINITY_DN75666_c0_g1_i4	AAQ15899	4.77e-06	hypothetical protein, conserved
TRINITY_DN75750_c4_g1	5728	3661	-1.56495	9.18684e-05	5803	3695	-1.56986	5.63238e-09	B	TRINITY_DN75750_c4_g1_i4	ABW06956.1	1.15e-61	chloroplast light-harvesting complex II protein precursor, partial [Euglena gracilis]	TRINITY_DN75750_c4_g1_i4	P27517.1	1.4e-36	RecName: Full=Chlorophyll a-b binding protein of LHCII type I, chloroplastic; Short=CAB; Short=LHCP; Flags: Precursor	TRINITY_DN75750_c4_g1_i4	AT1G29910.1	1.58e-35	Chlorophyll a-b binding protein 3, chloroplastic [Source:UniProtKB/Swiss-Prot;Acc:Q8VZ87]	TRINITY_DN75750_c4_g1_i4	EDO98358	2.78e-37	Chlorophyll a-b binding protein, chloroplastic [Source:UniProtKB/TrEMBL;Acc:A8JCU4]													Organelles, especially chloroplasts can act as a metal sink within the cell. An upregulation in these genes can account for more places for excess Hg to reside
TRINITY_DN75750_c4_g2	3819	2495	-1.53139	0.00226892	3869	2519	-1.5361	1.4291e-06	B	TRINITY_DN75750_c4_g2_i1	P12327.1	6.15e-40	RecName: Full=Chlorophyll a-b binding protein of LHCII type 1; AltName: Full=Chlorophyll a-b binding protein of LHCII type I; Short=CAB; Short=LHCP	TRINITY_DN75750_c4_g2_i1	P12327.1	2.17e-42	RecName: Full=Chlorophyll a-b binding protein of LHCII type 1; AltName: Full=Chlorophyll a-b binding protein of LHCII type I; Short=CAB; Short=LHCP	TRINITY_DN75750_c4_g2_i1	AT3G27690.2	1.35e-27	Photosystem II light harvesting complex protein 2.3 [Source:UniProtKB/TrEMBL;Acc:A0A1I9LMB4]	TRINITY_DN75750_c4_g2_i1	EDO96390	5.57e-30	Chlorophyll a-b binding protein, chloroplastic [Source:UniProtKB/TrEMBL;Acc:Q93WL4]
TRINITY_DN75750_c6_g3	13371	11820	-1.13122	0.047649	13540	11927	-1.13507	0.00902364	B	TRINITY_DN75750_c6_g3_i1	CAA43633.1	1.71e-32	light harvesting chlorophyll a /b binding protein of PSII, partial [Euglena gracilis]	TRINITY_DN75750_c6_g3_i1	P12330.2	1.11e-22	RecName: Full=Chlorophyll a-b binding protein 1, chloroplastic; AltName: Full=LHCII type I CAB-1; Short=LHCP; Flags: Precursor	TRINITY_DN75750_c6_g3_i1	AT2G05100.1	6.18e-21	photosystem II light harvesting complex gene 2.1 [Source:TAIR;Acc:AT2G05100]	TRINITY_DN75750_c6_g3_i1	EDP02923	3.29e-21	Chlorophyll a-b binding protein, chloroplastic [Source:UniProtKB/TrEMBL;Acc:Q93WE0]
TRINITY_DN75802_c5_g1	118	84	-1.40252	0.0133957	120	85	-1.40647	0.00452988	B
TRINITY_DN75815_c2_g1	148	105	-1.40647	0.00831973	150	106	-1.41044	0.00465071	B
TRINITY_DN75865_c0_g1	353	421	1.192	0.0236334	357	425	1.188	0.0245212	B
TRINITY_DN75964_c0_g1	398	289	-1.38122	7.07483e-05	403	292	-1.38504	0.000196713	B	TRINITY_DN75964_c0_g1_i4	BAC05484.2	0	ascorbate peroxidase [Euglena gracilis]	TRINITY_DN75964_c0_g1_i9	Q0JEQ2.1	5.81e-91	RecName: Full=Probable L-ascorbate peroxidase 3, peroxisomal; AltName: Full=OsAPx3	TRINITY_DN75964_c0_g1_i9	AT4G35000.1	1.68e-86	L-ascorbate peroxidase 3, peroxisomal [Source:UniProtKB/Swiss-Prot;Acc:Q42564]	TRINITY_DN75964_c0_g1_i9	EDP00040	3.83e-84	Cytochrome c peroxidase [Source:UniProtKB/TrEMBL;Acc:A8J7X9]	TRINITY_DN75964_c0_g1_i9	BAA17975	8.64e-25	catalase hpi
TRINITY_DN75969_c2_g2	2544	3272	1.286	5.68199e-20	2576	3301	1.281	4.78374e-15	B	TRINITY_DN75969_c2_g2_i6	XP_013897766.1	1.59e-28	Inorganic phosphate transporter 1-6 [Monoraphidium neglectum]	TRINITY_DN75969_c2_g2_i6	Q9SYQ1.2	2.6e-24	RecName: Full=Probable inorganic phosphate transporter 1-8; Short=AtPht1;8; AltName: Full=H(+)/Pi cotransporter	TRINITY_DN75969_c2_g2_i6	AT1G20860.2	2.34e-25	phosphate transporter 1;8 [Source:TAIR;Acc:AT1G20860]	TRINITY_DN75969_c2_g2_i6	EDP04438	1.15e-10	Proton/phosphate symporter, splice variant b [Source:UniProtKB/TrEMBL;Acc:A8ISD6]
TRINITY_DN76005_c0_g1	155	1111	7.162	9.29915e-89	156	1120	7.132	2.7003e-146	B	TRINITY_DN76005_c0_g1_i2	KWU45845.1	2.27e-107	40S ribosomal protein S11 [Rhodotorula sp. JG-1b]	TRINITY_DN76005_c0_g1_i2	P0CX47.1	7.71e-74	RecName: Full=40S ribosomal protein S11-A; AltName: Full=RP41; AltName: Full=S18; AltName: Full=Small ribosomal subunit protein uS17-A; AltName: Full=YS12	TRINITY_DN76005_c0_g1_i2	AT5G23740.1	1.36e-64	RPS11-BETA [Source:UniProtKB/TrEMBL;Acc:A0A178UPD3]	TRINITY_DN76005_c0_g1_i2	EDO96718	2.75e-67	Ribosomal protein S11 [Source:UniProtKB/TrEMBL;Acc:A8JHC3]	TRINITY_DN76005_c0_g1_i2	BAA17340	1.71e-06	30S ribosomal protein S17	TRINITY_DN76005_c0_g1_i2	ENSP00000270625.1	1.54e-64	ribosomal protein S11 [Source:HGNC Symbol;Acc:HGNC:10384]	TRINITY_DN76005_c0_g1_i2	EAN77486	1.47e-57	40S ribosomal proteins S11, putative
TRINITY_DN76093_c4_g1	2791	2102	-1.32626	9.56851e-24	2826	2121	-1.33156	2.23229e-18	B	TRINITY_DN76093_c4_g1_i1	KXN74365.1	0	2-isopropylmalate synthase [Conidiobolus coronatus NRRL 28638]	TRINITY_DN76093_c4_g1_i1	O04974.1	9.06e-171	RecName: Full=2-isopropylmalate synthase B; AltName: Full=Alpha-IPM synthase B; AltName: Full=Alpha-isopropylmalate synthase B	TRINITY_DN76093_c4_g1_i1	AT1G74040.1	1.83e-166	2-isopropylmalate synthase 2, chloroplastic [Source:UniProtKB/Swiss-Prot;Acc:Q9C550]	TRINITY_DN76093_c4_g1_i1	EDP08580	1.06e-122	Isopropylmalate synthase [Source:UniProtKB/TrEMBL;Acc:A8HXS9]	TRINITY_DN76093_c4_g1_i1	BAA10079	1.78e-165	2-isopropylmalate synthase	TRINITY_DN76093_c4_g1_i7	ENSP00000381654.2	5.55e-06	3-hydroxymethyl-3-methylglutaryl-CoA lyase like 1 [Source:HGNC Symbol;Acc:HGNC:21359]
TRINITY_DN76124_c4_g1	119	85	-1.40845	0.0274248	121	85	-1.41443	0.0185929	B
TRINITY_DN76130_c14_g2	201	245	1.218	0.0336848	204	247	1.213	0.01055	B	TRINITY_DN76130_c14_g2_i7	XP_020259394.1	9.22e-27	mitogen-activated protein kinase kinase kinase NPK1-like isoform X1 [Asparagus officinalis]	TRINITY_DN76130_c14_g2_i7	O22040.2	3.41e-26	RecName: Full=Mitogen-activated protein kinase kinase kinase ANP1; AltName: Full=Arabidopsis NPK1-related kinase 1	TRINITY_DN76130_c14_g2_i7	AT1G09000.1	4.03e-27	Mitogen-activated protein kinase kinase kinase ANP1 [Source:UniProtKB/Swiss-Prot;Acc:O22040]	TRINITY_DN76130_c14_g2_i7	EDO98466	1.28e-27	Predicted protein [Source:UniProtKB/TrEMBL;Acc:A8JC72]					TRINITY_DN76130_c14_g2_i7	ENSP00000351140.4	3.2e-20	mitogen-activated protein kinase kinase kinase 19 [Source:HGNC Symbol;Acc:HGNC:26249]	TRINITY_DN76130_c14_g2_i7	EAN78428	1.16e-19	protein kinase, putative
TRINITY_DN76138_c0_g1	140	98	-1.4245	0.0320648	141	99	-1.43062	0.0243498	B
TRINITY_DN76289_c2_g1	15004	16655	1.11	8.7964e-07	15190	16803	1.106	6.82132e-05	B	TRINITY_DN76289_c2_g1_i5	OLP92008.1	3.54e-20	Tankyrase [Symbiodinium microadriaticum]	TRINITY_DN76289_c2_g1_i5	Q9SAR5.2	4.67e-13	RecName: Full=Ankyrin repeat domain-containing protein 2A; Short=AtAKR2	TRINITY_DN76289_c2_g1_i5	AT4G35450.4	3.75e-14	Ankyrin repeat domain-containing protein 2 [Source:UniProtKB/TrEMBL;Acc:F4JN13]	TRINITY_DN76289_c2_g1_i5	EDP01160	1.72e-16	Flagellar associated protein [Source:UniProtKB/TrEMBL;Acc:A8J3J0]					TRINITY_DN76289_c2_g1_i5	ENSP00000384392.1	5.66e-12	ankyrin repeat domain 54 [Source:HGNC Symbol;Acc:HGNC:25185]	TRINITY_DN76289_c2_g1_i5	EAN79772	4.66e-09	hypothetical protein, conserved
TRINITY_DN76289_c2_g2	34054	36563	1.074	0.0150348	34475	36887	1.07	0.0239432	B	TRINITY_DN76289_c2_g2_i2	OLP92008.1	2.12e-45	Tankyrase [Symbiodinium microadriaticum]	TRINITY_DN76289_c2_g2_i2	Q9SAR5.2	1.76e-24	RecName: Full=Ankyrin repeat domain-containing protein 2A; Short=AtAKR2	TRINITY_DN76289_c2_g2_i2	AT4G35450.4	1.24e-25	Ankyrin repeat domain-containing protein 2 [Source:UniProtKB/TrEMBL;Acc:F4JN13]	TRINITY_DN76289_c2_g2_i2	EDP01160	2.79e-26	Flagellar associated protein [Source:UniProtKB/TrEMBL;Acc:A8J3J0]					TRINITY_DN76289_c2_g2_i2	ENSP00000215941.4	7.89e-15	ankyrin repeat domain 54 [Source:HGNC Symbol;Acc:HGNC:25185]	TRINITY_DN76289_c2_g2_i2	EAN79772	2.73e-11	hypothetical protein, conserved
TRINITY_DN76289_c2_g3	26900	28801	1.071	0.0151658	27232	29056	1.067	0.0307501	B	TRINITY_DN76289_c2_g3_i2	OLP92008.1	8.93e-22	Tankyrase [Symbiodinium microadriaticum]	TRINITY_DN76289_c2_g3_i2	Q9SAR5.2	3.05e-09	RecName: Full=Ankyrin repeat domain-containing protein 2A; Short=AtAKR2	TRINITY_DN76289_c2_g3_i2	AT4G35450.1	3.61e-10	Ankyrin repeat domain-containing protein 2 [Source:UniProtKB/TrEMBL;Acc:F4JN13]	TRINITY_DN76289_c2_g3_i2	EDP04867	6.65e-12	Predicted protein [Source:UniProtKB/TrEMBL;Acc:A8IQA5]
TRINITY_DN76289_c2_g5	45929	50134	1.092	0.00690421	46493	50579	1.088	0.00711712	B
TRINITY_DN76289_c2_g6	22235	24875	1.119	0.000728896	22509	25096	1.115	0.00239483	B
TRINITY_DN76326_c2_g2	884	799	-1.10619	0.0403456	895	806	-1.10988	0.0383336	B	TRINITY_DN76326_c2_g2_i1	CUF98996.1	3.63e-21	Hypothetical protein, putative [Bodo saltans]																					TRINITY_DN76326_c2_g2_i1	EAN76739	3.71e-17	hypothetical protein, conserved
TRINITY_DN76342_c1_g1	294	231	-1.26743	0.0025792	297	234	-1.27226	0.000662314	B	TRINITY_DN76342_c1_g1_i1	OPX19114.1	1.68e-29	hypothetical protein BZ151_10950, partial [Desulfobacca sp. 4484_104]	TRINITY_DN76342_c1_g1_i1	P40138.3	8.48e-19	RecName: Full=Adenylate cyclase 2; AltName: Full=ATP pyrophosphate-lyase 2; AltName: Full=Adenylyl cyclase 2; Short=AC2					TRINITY_DN76342_c1_g1_i1	EDP08107	6.18e-06	Guanylate cyclase [Source:UniProtKB/TrEMBL;Acc:A8I1G7]	TRINITY_DN76342_c1_g1_i1	BAA16969	1.97e-18	adenylate cyclase	TRINITY_DN76342_c1_g1_i1	ENSP00000393177.2	5.22e-06	adenylate cyclase 4 [Source:HGNC Symbol;Acc:HGNC:235]
TRINITY_DN76371_c0_g2	479	551	1.15	0.0232078	485	556	1.146	0.027492	B	TRINITY_DN76371_c0_g2_i10	XP_001681215.1	3.74e-103	putative protein kinase [Leishmania major strain Friedlin]	TRINITY_DN76371_c0_g2_i10	P51566.2	2.08e-96	RecName: Full=Serine/threonine-protein kinase AFC1	TRINITY_DN76371_c0_g2_i10	AT3G53570.1	2.45e-97	AT3G53570 protein [Source:UniProtKB/TrEMBL;Acc:B9DH08]	TRINITY_DN76371_c0_g2_i10	EDP02773	2.75e-81	Predicted protein [Source:UniProtKB/TrEMBL;Acc:A8IZ65]	TRINITY_DN76371_c0_g2_i10	BAA18552	1.5e-11	serine/threonine protein kinase	TRINITY_DN76371_c0_g2_i10	ENSP00000326830.4	6.54e-77	CDC like kinase 1 [Source:HGNC Symbol;Acc:HGNC:2068]	TRINITY_DN76371_c0_g2_i10	EAN80192	5.78e-101	protein kinase, putative
TRINITY_DN76389_c7_g1	2475	2109	-1.17371	7.6249e-07	2506	2128	-1.17786	8.9813e-06	B	TRINITY_DN76389_c7_g1_i1	XP_005838997.1	0	Isopropylmalate dehydratase [Guillardia theta CCMP2712]	TRINITY_DN76389_c7_g1_i1	P55251.1	0	RecName: Full=3-isopropylmalate dehydratase; AltName: Full=Alpha-IPM isomerase; Short=IPMI; AltName: Full=Isopropylmalate isomerase	TRINITY_DN76389_c7_g1_i7	AT4G13430.1	9.64e-60	3-isopropylmalate dehydratase large subunit, chloroplastic [Source:UniProtKB/Swiss-Prot;Acc:Q94AR8]	TRINITY_DN76389_c7_g1_i7	EDO97224	6.85e-52	Isopropylmalate dehydratase, large subunit [Source:UniProtKB/TrEMBL;Acc:A8JG03]	TRINITY_DN76389_c7_g1_i7	BAA18738	4.31e-157	3-isopropylmalate dehydratase	TRINITY_DN76389_c7_g1_i7	ENSP00000216254.4	5.23e-18	aconitase 2 [Source:HGNC Symbol;Acc:HGNC:118]	TRINITY_DN76389_c7_g1_i7	EAN78771	4.2e-16	aconitase
TRINITY_DN76420_c4_g1	139	90	-1.55763	0.000706908	141	90	-1.5625	0.000566761	B
TRINITY_DN76421_c3_g1	3280	3636	1.108	0.00033311	3320	3668	1.105	0.00245717	B	TRINITY_DN76421_c3_g1_i3	WP_095248724.1	1.64e-110	NO-inducible flavohemoprotein [Bacillus sp. 7884-1]	TRINITY_DN76421_c3_g1_i2	Q7WUM8.2	4.67e-107	RecName: Full=Flavohemoprotein; AltName: Full=Flavohemoglobin; AltName: Full=Hemoglobin-like protein; AltName: Full=Nitric oxide dioxygenase; Short=NO oxygenase; Short=NOD	TRINITY_DN76421_c3_g1_i1	AT3G10520.1	5.26e-07	Non-symbiotic hemoglobin 2 [Source:UniProtKB/Swiss-Prot;Acc:O24521]									TRINITY_DN76421_c3_g1_i1	ENSP00000298352.4	5.3e-08	neuroglobin [Source:HGNC Symbol;Acc:HGNC:14077]
TRINITY_DN76436_c0_g1	171	239	1.404	0.00255887	173	241	1.398	0.00313959	B
TRINITY_DN76462_c2_g1	173	136	-1.27714	0.0484198	175	137	-1.28205	0.0194443	B
TRINITY_DN76494_c0_g1	2710	3105	1.146	1.29175e-07	2744	3132	1.142	9.95292e-06	B	TRINITY_DN76494_c0_g1_i8	XP_002951653.1	2.24e-149	hypothetical protein VOLCADRAFT_105176 [Volvox carteri f. nagariensis]	TRINITY_DN76494_c0_g1_i8	P12522.1	4.29e-137	RecName: Full=Probable proton ATPase 1B; AltName: Full=LdH1B	TRINITY_DN76494_c0_g1_i8	AT4G30190.1	2.33e-64	Plasma membrane ATPase [Source:UniProtKB/TrEMBL;Acc:F4JPJ7]	TRINITY_DN76494_c0_g1_i8	EDP06054	1.15e-157	Plasma membrane ATPase [Source:UniProtKB/TrEMBL;Acc:A8IFK0]	TRINITY_DN76494_c0_g1_i8	BAA17897	2.45e-27	cation-transporting ATPase; E1-E2 ATPase	TRINITY_DN76494_c0_g1_i8	ENSP00000295598.5	1.21e-27	ATPase Na+/K+ transporting subunit alpha 1 [Source:HGNC Symbol;Acc:HGNC:799]	TRINITY_DN76494_c0_g1_i8	EAN78627	1.6e-145	P-type H+-ATPase, putative
TRINITY_DN76518_c3_g1	141	212	1.503	0.000861514	143	214	1.498	0.00121319	B
TRINITY_DN76548_c3_g2	37958	41058	1.082	0.0334128	38423	41426	1.078	0.0376041	B	TRINITY_DN76548_c3_g2_i4	ABW06946.1	1.06e-70	chloroplast light-harvesting complex I protein precursor, partial [Euglena gracilis]	TRINITY_DN76548_c3_g2_i4	P08976.1	9.22e-63	RecName: Full=Light-harvesting complex I LH38 proteins; Contains: RecName: Full=LH38 protein 1; Contains: RecName: Full=LH38 protein 2; Contains: RecName: Full=LH38 protein 3; Flags: Precursor	TRINITY_DN76548_c3_g2_i4	AT2G05070.1	1.97e-16	Chlorophyll a-b binding protein 2.2, chloroplastic [Source:UniProtKB/Swiss-Prot;Acc:Q9S7J7]	TRINITY_DN76548_c3_g2_i4	EDP02923	5.38e-17	Chlorophyll a-b binding protein, chloroplastic [Source:UniProtKB/TrEMBL;Acc:Q93WE0]
TRINITY_DN76569_c3_g3	186	143	-1.31062	0.041834	188	144	-1.31406	0.0247156	B	TRINITY_DN76569_c3_g3_i3	CCC96183.1	1.07e-07	unnamed protein product [Trypanosoma congolense IL3000]																					TRINITY_DN76569_c3_g3_i3	AAZ10966	2.07e-09	receptor-type adenylate cyclase GRESAG 4, putative
TRINITY_DN76579_c1_g1	4139	2722	-1.51976	2.32327e-12	4193	2747	-1.52672	4.82934e-18	B
TRINITY_DN76579_c1_g2	1203	849	-1.41443	5.06266e-13	1218	856	-1.42045	1.37201e-10	B
TRINITY_DN76579_c1_g3	1033	751	-1.37552	0.00773522	1047	758	-1.38122	0.000135735	B
TRINITY_DN76629_c0_g3	67	104	1.547	0.000401976	68	104	1.541	5.59829e-05	B	TRINITY_DN76629_c0_g3_i1	EPS66158.1	3.13e-14	hypothetical protein M569_08619 [Genlisea aurea]
TRINITY_DN76677_c0_g1	336	268	-1.25313	0.00088716	340	271	-1.25786	0.000186919	B	TRINITY_DN76677_c0_g1_i1	WP_004359853.1	1.6e-28	collagen-binding protein [Thauera phenylacetica]	TRINITY_DN76677_c0_g1_i1	Q2G0L4.1	1.43e-19	RecName: Full=Serine-aspartate repeat-containing protein D; Flags: Precursor
TRINITY_DN76723_c0_g1	1140	755	-1.5083	0.00231227	1155	762	-1.51515	1.03411e-05	B
TRINITY_DN76757_c0_g1	652	544	-1.19617	0.0154423	659	549	-1.20048	0.0207896	B	TRINITY_DN76757_c0_g1_i20	KOO23544.1	1.18e-29	ADP-ribosyltransferase 1 precursor [Chrysochromulina sp. CCMP291]
TRINITY_DN76782_c1_g1	1116	1010	-1.10497	0.0183688	1130	1019	-1.10865	0.0214917	B	TRINITY_DN76782_c1_g1_i4	WP_093026894.1	3.8e-32	DsbA family oxidoreductase [Ruegeria marina]					TRINITY_DN76782_c1_g1_i4	AT5G38900.1	2.21e-25	Thioredoxin superfamily protein [Source:TAIR;Acc:AT5G38900]	TRINITY_DN76782_c1_g1_i4	EDP03088	2.29e-13	Thioredoxin superfamily protein [Source:Projected from Arabidopsis thaliana (AT5G38900) TAIR;Acc:AT5G38900]
TRINITY_DN76811_c2_g1	143	96	-1.49925	0.00389638	145	96	-1.50602	0.00334476	B	TRINITY_DN76811_c2_g1_i2	WP_029637034.1	3.23e-19	hypothetical protein [[Scytonema hofmanni] UTEX B 1581]	TRINITY_DN76811_c2_g1_i2	Q69ZR2.2	3.07e-14	RecName: Full=E3 ubiquitin-protein ligase HECTD1; AltName: Full=HECT domain-containing protein 1; AltName: Full=HECT-type E3 ubiquitin transferase HECTD1; AltName: Full=Protein open mind	TRINITY_DN76811_c2_g1_i2	AT2G30600.5	4.84e-12	BTB/POZ domain-containing protein [Source:UniProtKB/TrEMBL;Acc:F4INV5]	TRINITY_DN76811_c2_g1_i2	EDP00099	1.25e-10	Predicted protein [Source:UniProtKB/TrEMBL;Acc:A8J7F7]					TRINITY_DN76811_c2_g1_i2	ENSP00000451860.1	4.59e-15	HECT domain E3 ubiquitin protein ligase 1 [Source:HGNC Symbol;Acc:HGNC:20157]
TRINITY_DN76818_c5_g1	6190	6641	1.073	0.00303341	6267	6700	1.069	0.0281839	B	TRINITY_DN76818_c5_g1_i3	AAU11483.1	0	chloroplast phosphoglycerate kinase precursor, partial [Euglena gracilis]	TRINITY_DN76818_c5_g1_i3	P07205.3	2.08e-146	RecName: Full=Phosphoglycerate kinase 2; AltName: Full=Phosphoglycerate kinase, testis specific	TRINITY_DN76818_c5_g1_i3	AT3G12780.1	5.71e-83	Phosphoglycerate kinase [Source:UniProtKB/TrEMBL;Acc:A0A178V5M8]	TRINITY_DN76818_c5_g1_i3	EDO98586	1.03e-81	Phosphoglycerate kinase [Source:UniProtKB/TrEMBL;Acc:A8JC04]	TRINITY_DN76818_c5_g1_i3	BAA18521	3.38e-66	phosphoglycerate kinase	TRINITY_DN76818_c5_g1_i3	ENSP00000305995.3	4.55e-147	phosphoglycerate kinase 2 [Source:HGNC Symbol;Acc:HGNC:8898]	TRINITY_DN76818_c5_g1_i3	CAJ15978	1.16e-71	phosphoglycerate kinase
TRINITY_DN76820_c11_g1	7540	8314	1.103	0.000852145	7633	8387	1.099	0.00689374	B	TRINITY_DN76820_c11_g1_i1	ALI53531.1	9.55e-43	cytosolic heat shock protein 90, partial [Entosiphon oblongum]	TRINITY_DN76820_c11_g1_i1	P27890.1	1.04e-37	RecName: Full=Heat shock protein 83; Short=HSP 83; AltName: Full=HSP 90	TRINITY_DN76820_c11_g1_i1	AT5G52640.1	1.02e-35	Heat shock protein 90-1 [Source:UniProtKB/Swiss-Prot;Acc:P27323]	TRINITY_DN76820_c11_g1_i1	EDP01972	6.11e-36	Heat shock protein 90A [Source:UniProtKB/TrEMBL;Acc:A8J1U1]					TRINITY_DN76820_c11_g1_i1	ENSP00000335153.7	1.73e-36	heat shock protein 90 alpha family class A member 1 [Source:HGNC Symbol;Acc:HGNC:5253]	TRINITY_DN76820_c11_g1_i1	EAN78479	5.48e-37	heat shock protein 83
TRINITY_DN76820_c4_g1	1961	1800	-1.08932	0.0209354	1986	1815	-1.09409	0.0262188	B	TRINITY_DN76820_c4_g1_i3	ANA05362.1	8.49e-119	heat shock protein 90 [Euglena agilis]	TRINITY_DN76820_c4_g1_i3	P12861.1	6.73e-95	RecName: Full=Heat shock protein 83	TRINITY_DN76820_c4_g1_i3	AT5G56030.1	2.8e-95	Heat shock protein 81-2 [Source:UniProtKB/TrEMBL;Acc:F4K6B6]	TRINITY_DN76820_c4_g1_i3	EDP01972	2.82e-90	Heat shock protein 90A [Source:UniProtKB/TrEMBL;Acc:A8J1U1]	TRINITY_DN76820_c4_g1_i3	BAA18821	3.5e-25	heat shock protein	TRINITY_DN76820_c4_g1_i3	ENSP00000216281.7	3.68e-85	heat shock protein 90 alpha family class A member 1 [Source:HGNC Symbol;Acc:HGNC:5253]	TRINITY_DN76820_c4_g1_i3	EAN78479	1.44e-96	heat shock protein 83
TRINITY_DN76820_c5_g1	6065	6680	1.101	0.000245558	6141	6739	1.098	0.00353652	B	TRINITY_DN76820_c5_g1_i3	ANA05362.1	7.99e-19	heat shock protein 90 [Euglena agilis]	TRINITY_DN76820_c5_g1_i3	P20147.1	2.98e-13	RecName: Full=Heat shock 90 kDa protein homolog	TRINITY_DN76820_c5_g1_i3	AT5G52640.1	2.03e-10	Heat shock protein 90-1 [Source:UniProtKB/Swiss-Prot;Acc:P27323]	TRINITY_DN76820_c5_g1_i3	EDP01972	6.8e-11	Heat shock protein 90A [Source:UniProtKB/TrEMBL;Acc:A8J1U1]					TRINITY_DN76820_c5_g1_i3	ENSP00000216281.7	4.36e-09	heat shock protein 90 alpha family class A member 1 [Source:HGNC Symbol;Acc:HGNC:5253]	TRINITY_DN76820_c5_g1_i3	EAN78479	8.94e-14	heat shock protein 83
TRINITY_DN76820_c5_g2	32518	35483	1.091	0.00291578	32922	35794	1.087	0.00594387	B	TRINITY_DN76820_c5_g2_i8	AMN16512.1	2.36e-136	heat shock protein 90, partial [Euglena agilis]	TRINITY_DN76820_c5_g2_i8	P12861.1	3.74e-102	RecName: Full=Heat shock protein 83	TRINITY_DN76820_c5_g2_i8	AT5G52640.1	1.24e-101	Heat shock protein 90-1 [Source:UniProtKB/Swiss-Prot;Acc:P27323]	TRINITY_DN76820_c5_g2_i8	EDP01972	3.33e-105	Heat shock protein 90A [Source:UniProtKB/TrEMBL;Acc:A8J1U1]					TRINITY_DN76820_c5_g2_i8	ENSP00000481908.1	1.52e-86	heat shock protein 90 alpha family class B member 1 [Source:HGNC Symbol;Acc:HGNC:5258]	TRINITY_DN76820_c5_g2_i8	EAN78479	1.4e-104	heat shock protein 83
TRINITY_DN76839_c1_g1	1858	2129	1.146	3.38474e-06	1880	2148	1.142	7.34918e-05	B	TRINITY_DN76839_c1_g1_i3	OLQ13473.1	9.17e-72	Purple acid phosphatase 18 [Symbiodinium microadriaticum]	TRINITY_DN76839_c1_g1_i4	Q8S340.1	3.22e-41	RecName: Full=Purple acid phosphatase 22; Flags: Precursor	TRINITY_DN76839_c1_g1_i4	AT3G52820.1	3.81e-42	Purple acid phosphatase 22 [Source:UniProtKB/Swiss-Prot;Acc:Q8S340]	TRINITY_DN76839_c1_g1_i4	EDP08805	6.41e-30	Purple acid phosphatase [Source:UniProtKB/TrEMBL;Acc:A8HTI5]	TRINITY_DN76839_c1_g1_i3	BAA16722	8.36e-08	alkaline phosphatase	TRINITY_DN76839_c1_g1_i4	ENSP00000327557.4	2.71e-16	acid phosphatase 7, tartrate resistant (putative) [Source:HGNC Symbol;Acc:HGNC:33781]
TRINITY_DN76874_c11_g2	50	306	6.1	4.84725e-25	51	309	6.065	3.34138e-47	B	TRINITY_DN76874_c11_g2_i2	KWU44836.1	8.33e-71	hypothetical protein RHOSPDRAFT_33657 [Rhodotorula sp. JG-1b]	TRINITY_DN76874_c11_g2_i2	Q9XGL4.1	6.46e-30	RecName: Full=60S ribosomal protein L31	TRINITY_DN76874_c11_g2_i2	AT4G26230.1	4.16e-18	Putative ribosomal protein [Source:UniProtKB/TrEMBL;Acc:Q0WRN2]	TRINITY_DN76874_c11_g2_i2	EDP05369	7.29e-18	Ribosomal protein L31 [Source:UniProtKB/TrEMBL;Acc:A8ILG8]					TRINITY_DN76874_c11_g2_i2	ENSP00000386681.1	7.67e-29	ribosomal protein L31 [Source:HGNC Symbol;Acc:HGNC:10334]	TRINITY_DN76874_c11_g2_i2	EAN77142	6.82e-11	60S ribosomal subunit protein L31, putative
TRINITY_DN76900_c11_g2	398	497	1.249	0.00158249	403	501	1.243	0.00455174	B	TRINITY_DN76900_c11_g2_i1	OWZ09451.1	9.93e-19	DNA replication complex GINS protein PSF1 [Phytophthora megakarya]	TRINITY_DN76900_c11_g2_i1	Q54HR6.1	5.92e-16	RecName: Full=Probable DNA replication complex GINS protein PSF1; AltName: Full=GINS complex subunit 1	TRINITY_DN76900_c11_g2_i1	AT1G80190.4	9.93e-10	partner of SLD five 1 [Source:TAIR;Acc:AT1G80190]									TRINITY_DN76900_c11_g2_i1	ENSP00000262460.4	2.15e-08	GINS complex subunit 1 [Source:HGNC Symbol;Acc:HGNC:28980]	TRINITY_DN76900_c11_g2_i1	EAN76569	3.55e-13	hypothetical protein, conserved
TRINITY_DN76924_c1_g3	452	303	-1.49254	1.94267e-08	458	306	-1.49925	3.71165e-07	B
TRINITY_DN76944_c0_g1	615	369	-1.66667	0.00462755	624	372	-1.67504	2.90327e-05	B
TRINITY_DN76956_c3_g1	3677	4036	1.098	0.0148243	3722	4071	1.094	0.0330018	B	TRINITY_DN76956_c3_g1_i5	P08976.1	4.5e-46	RecName: Full=Light-harvesting complex I LH38 proteins; Contains: RecName: Full=LH38 protein 1; Contains: RecName: Full=LH38 protein 2; Contains: RecName: Full=LH38 protein 3; Flags: Precursor	TRINITY_DN76956_c3_g1_i5	P08976.1	1.59e-48	RecName: Full=Light-harvesting complex I LH38 proteins; Contains: RecName: Full=LH38 protein 1; Contains: RecName: Full=LH38 protein 2; Contains: RecName: Full=LH38 protein 3; Flags: Precursor	TRINITY_DN76956_c3_g1_i5	AT3G54890.3	2.71e-06	Chlorophyll a-b binding protein, chloroplastic [Source:UniProtKB/TrEMBL;Acc:A0A178VBT7]	TRINITY_DN76956_c3_g1_i5	EDP07628	6e-06	Chlorophyll a-b binding protein, chloroplastic [Source:UniProtKB/TrEMBL;Acc:A8I3C6]
TRINITY_DN76963_c2_g1	1064	785	-1.35318	3.53223e-12	1078	792	-1.3587	4.60477e-10	B	TRINITY_DN76963_c2_g1_i3	WP_082374209.1	5.32e-10	hypothetical protein [Ardenticatena maritima]
TRINITY_DN76963_c3_g2	435	497	1.141	0.027831	441	501	1.137	0.0224504	B	TRINITY_DN76963_c3_g2_i7	XP_009312165.1	7.7e-175	adenylosuccinate synthetase [Trypanosoma grayi]	TRINITY_DN76963_c3_g2_i7	Q4CWX1.1	1.19e-170	RecName: Full=Adenylosuccinate synthetase 2; Short=AMPSase 2; Short=AdSS 2; AltName: Full=IMP--aspartate ligase 2	TRINITY_DN76963_c3_g2_i5	AT3G57610.1	4.38e-17	Adenylosuccinate synthetase, chloroplastic [Source:UniProtKB/Swiss-Prot;Acc:Q96529]	TRINITY_DN76963_c3_g2_i5	EDP03502	3.61e-20	Adenylosuccinate synthetase, chloroplastic [Source:UniProtKB/Swiss-Prot;Acc:A8IW34]	TRINITY_DN76963_c3_g2_i5	BAA17318	4.79e-13	adenylosuccinate synthetase	TRINITY_DN76963_c3_g2_i5	ENSP00000331260.2	1.07e-15	adenylosuccinate synthase like 1 [Source:HGNC Symbol;Acc:HGNC:20093]	TRINITY_DN76963_c3_g2_i3	EAN79334	2.18e-162	adenylosuccinate synthetase, putative
TRINITY_DN76976_c6_g1	1916	1406	-1.3624	2.29888e-27	1941	1419	-1.36799	1.94443e-20	B	TRINITY_DN76976_c6_g1_i2	XP_008881007.1	9.43e-07	2-isopropylmalate synthase [Aphanomyces invadans]
TRINITY_DN77011_c0_g1	684	568	-1.20627	0.0001802	693	573	-1.21065	0.000549602	B
TRINITY_DN77032_c1_g1	200	142	-1.40647	0.00333674	203	144	-1.41044	0.00238754	B
TRINITY_DN77055_c1_g2	7342	8042	1.095	0.000747499	7433	8113	1.091	0.00518698	B	TRINITY_DN77055_c1_g2_i6	OLS14603.1	1.34e-176	acetyl-CoA acetyltransferase [Candidatus Lokiarchaeota archaeon CR_4]	TRINITY_DN77055_c1_g2_i6	Q18AR0.1	1.1e-94	RecName: Full=Acetyl-CoA acetyltransferase; AltName: Full=Acetoacetyl-CoA thiolase	TRINITY_DN77055_c1_g2_i6	AT5G47720.3	1.12e-68	Probable acetyl-CoA acetyltransferase, cytosolic 2 [Source:UniProtKB/Swiss-Prot;Acc:Q9FIK7]	TRINITY_DN77055_c1_g2_i9	EDP02040	1.29e-54	Predicted protein [Source:UniProtKB/TrEMBL;Acc:A8J0X4]	TRINITY_DN77055_c1_g2_i6	BAA17882	3.56e-63	acetyl coenzyme A acetyltransferase (thiolase)	TRINITY_DN77055_c1_g2_i6	ENSP00000285093.8	2.07e-84	acetyl-CoA acyltransferase 2 [Source:HGNC Symbol;Acc:HGNC:83]
TRINITY_DN77066_c1_g1	2619	2866	1.094	0.00523832	2651	2892	1.09	0.0203681	B	TRINITY_DN77066_c1_g1_i2	APF46015.1	1.13e-156	plastid porphobilinogen deaminase, partial [Euglena gracilis]	TRINITY_DN77066_c1_g1_i2	P13446.1	7.28e-154	RecName: Full=Porphobilinogen deaminase, chloroplastic; Short=PBG; AltName: Full=Hydroxymethylbilane synthase; Short=HMBS; AltName: Full=Pre-uroporphyrinogen synthase; Flags: Precursor	TRINITY_DN77066_c1_g1_i2	AT5G08280.1	6.28e-37	Porphobilinogen deaminase, chloroplastic [Source:UniProtKB/Swiss-Prot;Acc:Q43316]	TRINITY_DN77066_c1_g1_i2	EDO97482	2.83e-43	Porphobilinogen deaminase [Source:UniProtKB/TrEMBL;Acc:A8JFB1]	TRINITY_DN77066_c1_g1_i2	BAA17705	5.2e-52	porphobilinogen deaminase	TRINITY_DN77066_c1_g1_i2	ENSP00000376584.1	2.58e-48	hydroxymethylbilane synthase [Source:HGNC Symbol;Acc:HGNC:4982]
TRINITY_DN77108_c1_g1	1900	1767	-1.07527	0.0378562	1924	1783	-1.07875	0.0424541	B
TRINITY_DN77143_c0_g1	178	86	-2.07469	0.000373903	181	87	-2.079	2.15706e-06	B
TRINITY_DN77219_c1_g1	235	174	-1.34953	0.0142425	238	176	-1.35318	0.0106553	B	TRINITY_DN77219_c1_g1_i1	BAD20740.1	1.37e-19	putative membrane-bound adenylyl cyclase [Euglena gracilis]
TRINITY_DN77237_c0_g1	317	261	-1.21803	0.0162108	322	263	-1.221	0.006286	B
TRINITY_DN77256_c1_g2	13264	14304	1.078	0.00990191	13426	14432	1.075	0.0258757	B	TRINITY_DN77256_c1_g2_i2	CAA78363.1	9.2e-09	cytoskeletal protein [Euglena gracilis]
TRINITY_DN77272_c2_g3	4043	4851	1.2	1.79448e-10	4092	4894	1.196	1.26424e-08	B	TRINITY_DN77272_c2_g3_i2	WP_015845739.1	3.32e-37	NAD(P)-dependent alcohol dehydrogenase [Paenibacillus sp. JDR-2]	TRINITY_DN77272_c2_g3_i2	P0CH36.1	1.58e-36	RecName: Full=NADP-dependent alcohol dehydrogenase C 1; Short=Ms-ADHC 1	TRINITY_DN77272_c2_g3_i2	AT4G37970.2	6.95e-30	Probable cinnamyl alcohol dehydrogenase 6 [Source:UniProtKB/Swiss-Prot;Acc:O65621]	TRINITY_DN77272_c2_g3_i2	EDP03196	3.52e-35	Predicted protein [Source:UniProtKB/TrEMBL;Acc:A8IX47]	TRINITY_DN77272_c2_g3_i2	BAA18840	7.62e-12	zinc-containing alcohol dehydrogenase family	TRINITY_DN77272_c2_g3_i10	ENSP00000423571.1	4.7e-08	alcohol dehydrogenase 4 (class II), pi polypeptide [Source:HGNC Symbol;Acc:HGNC:252]
TRINITY_DN77387_c1_g1	224	144	-1.55763	0.0308453	227	145	-1.56495	0.0014794	B
TRINITY_DN77436_c1_g3	7674	8588	1.119	7.98343e-06	7768	8664	1.115	0.000134259	B	TRINITY_DN77436_c1_g3_i1	ABW06947.1	6.89e-172	chloroplast light-harvesting complex I protein precursor [Euglena gracilis]	TRINITY_DN77436_c1_g3_i1	P08976.1	9.04e-97	RecName: Full=Light-harvesting complex I LH38 proteins; Contains: RecName: Full=LH38 protein 1; Contains: RecName: Full=LH38 protein 2; Contains: RecName: Full=LH38 protein 3; Flags: Precursor	TRINITY_DN77436_c1_g3_i1	AT2G34420.1	6.55e-35	Chlorophyll a-b binding protein, chloroplastic [Source:UniProtKB/TrEMBL;Acc:Q39141]	TRINITY_DN77436_c1_g3_i1	EDP00188	3.46e-38	Chlorophyll a-b binding protein, chloroplastic [Source:UniProtKB/TrEMBL;Acc:Q9ZSJ4]
TRINITY_DN77436_c1_g5	7568	8213	1.085	0.00489991	7661	8286	1.081	0.0171041	B	TRINITY_DN77436_c1_g5_i1	P08975.1	3.93e-61	RecName: Full=Light-harvesting complex I LH35 proteins; Contains: RecName: Full=LH35 protein 1; Contains: RecName: Full=LH35 protein 2; Flags: Precursor	TRINITY_DN77436_c1_g5_i1	P08975.1	1.39e-63	RecName: Full=Light-harvesting complex I LH35 proteins; Contains: RecName: Full=LH35 protein 1; Contains: RecName: Full=LH35 protein 2; Flags: Precursor	TRINITY_DN77436_c1_g5_i1	AT5G54270.1	1.72e-11	Chlorophyll a-b binding protein 3, chloroplastic [Source:UniProtKB/Swiss-Prot;Acc:Q9S7M0]	TRINITY_DN77436_c1_g5_i1	EDP00188	1.62e-11	Chlorophyll a-b binding protein, chloroplastic [Source:UniProtKB/TrEMBL;Acc:Q9ZSJ4]
TRINITY_DN77442_c2_g1	1124	1020	-1.10254	0.0428738	1137	1028	-1.10619	0.0379361	B	TRINITY_DN77442_c2_g1_i2	XP_009309594.1	1.91e-15	hypothetical protein DQ04_01931010 [Trypanosoma grayi]																					TRINITY_DN77442_c2_g1_i2	AAZ12332	5.31e-17	hypothetical protein, conserved
TRINITY_DN77501_c4_g1	173	104	-1.66113	0.000606641	176	105	-1.66945	0.000872996	B
TRINITY_DN77512_c3_g1	3341	3906	1.169	4.28067e-08	3382	3940	1.165	2.40071e-06	B
TRINITY_DN77528_c0_g1	678	383	-1.76991	0.00112757	687	387	-1.7762	1.94979e-06	B
TRINITY_DN77556_c4_g1	61	1132	18.705	4.09802e-15	61	1142	18.613	7.5582e-24	B
TRINITY_DN77586_c8_g3	2160	2411	1.116	0.0247446	2186	2433	1.112	0.0433513	B
TRINITY_DN77631_c7_g1	354	285	-1.24069	0.0142405	358	288	-1.24378	0.0118591	B	TRINITY_DN77631_c7_g1_i1	OLP77942.1	1.69e-102	Puromycin-sensitive aminopeptidase [Symbiodinium microadriaticum]	TRINITY_DN77631_c7_g1_i1	P55786.2	1.22e-44	RecName: Full=Puromycin-sensitive aminopeptidase; Short=PSA; AltName: Full=Cytosol alanyl aminopeptidase; Short=AAP-S	TRINITY_DN77631_c7_g1_i1	AT4G33090.1	4.34e-41	ATAPM1 [Source:UniProtKB/TrEMBL;Acc:A0A178UWR6]	TRINITY_DN77631_c7_g1_i2	EDO98513	2.76e-07	Predicted protein [Source:UniProtKB/TrEMBL;Acc:A8JC99]	TRINITY_DN77631_c7_g1_i2	BAA18632	3.42e-07	aminopeptidase	TRINITY_DN77631_c7_g1_i1	ENSP00000320324.4	2.68e-45	aminopeptidase puromycin sensitive [Source:HGNC Symbol;Acc:HGNC:7900]	TRINITY_DN77631_c7_g1_i1	EAN79326	5.09e-44	aminopeptidase, putative
TRINITY_DN77668_c0_g2	6164	6949	1.127	6.52174e-06	6240	7010	1.123	0.000219023	B
TRINITY_DN77686_c1_g1	142	92	-1.53846	0.000753513	144	93	-1.54321	0.00052406	B
TRINITY_DN77689_c2_g2	573	661	1.153	0.0191153	580	667	1.149	0.0370815	B
TRINITY_DN77702_c2_g1	432	368	-1.17096	0.0490574	437	372	-1.17509	0.0453733	B	TRINITY_DN77702_c2_g1_i4	BAD20740.1	1.39e-78	putative membrane-bound adenylyl cyclase [Euglena gracilis]	TRINITY_DN77702_c2_g1_i4	Q27675.1	2.76e-42	RecName: Full=Receptor-type adenylate cyclase A; AltName: Full=ATP pyrophosphate-lyase; AltName: Full=Adenylyl cyclase					TRINITY_DN77702_c2_g1_i4	EDP03336	1.57e-14	Predicted protein [Source:UniProtKB/TrEMBL;Acc:A8IX39]									TRINITY_DN77702_c2_g1_i4	AAZ12669	3.63e-43	receptor-type adenylate cyclase GRESAG 4, putative
TRINITY_DN77704_c7_g1	207	273	1.32	0.0165589	210	276	1.315	0.0169936	B
TRINITY_DN77730_c1_g1	1311	1138	-1.15207	0.00106869	1327	1148	-1.15607	0.0022215	B	TRINITY_DN77730_c1_g1_i5	CEG48410.1	1.58e-09	camk protein kinase [Plasmopara halstedii]	TRINITY_DN77730_c1_g1_i5	Q90ZY4.1	4.46e-10	RecName: Full=Serine/threonine-protein kinase SBK1; AltName: Full=Brain-specific protein kinase BSK146; AltName: Full=SH3-binding kinase 1	TRINITY_DN77730_c1_g1_i1	AT1G09000.2	1.33e-07	Mitogen-activated protein kinase kinase kinase ANP1 [Source:UniProtKB/Swiss-Prot;Acc:O22040]	TRINITY_DN77730_c1_g1_i5	EDP07929	3.54e-09	Predicted protein [Source:UniProtKB/TrEMBL;Acc:A8I1H8]					TRINITY_DN77730_c1_g1_i8	ENSP00000262752.2	3.35e-09	ribosomal protein S6 kinase A6 [Source:HGNC Symbol;Acc:HGNC:10435]	TRINITY_DN77730_c1_g1_i5	EAN78477	6.71e-10	protein kinase, putative
TRINITY_DN77750_c4_g1	124	83	-1.5083	0.0135967	126	83	-1.51286	0.0121043	B
TRINITY_DN77783_c0_g3	122	165	1.356	0.0193474	123	166	1.351	0.012425	B
TRINITY_DN77799_c2_g1	800	681	-1.17509	0.000140827	811	687	-1.17925	0.000255909	B	TRINITY_DN77799_c2_g1_i2	KPK14864.1	0	hypothetical protein AMJ62_11495 [Myxococcales bacterium SG8_38]	TRINITY_DN77799_c2_g1_i2	Q9FGS4.1	5.37e-155	RecName: Full=Quinolinate synthase, chloroplastic; AltName: Full=Protein ONSET OF LEAF DEATH 5; AltName: Full=Protein SULFUR E 3; Flags: Precursor	TRINITY_DN77799_c2_g1_i2	AT5G50210.1	6.35e-156	SUFE3 [Source:UniProtKB/TrEMBL;Acc:A0A178UIT6]	TRINITY_DN77799_c2_g1_i6	EDP08391	3.43e-69	Quinolinate synthetase A-like protein [Source:UniProtKB/TrEMBL;Acc:A8HYN1]	TRINITY_DN77799_c2_g1_i2	BAA18685	2.92e-12	quinolinate synthetase
TRINITY_DN77856_c2_g1	1520	1387	-1.09649	0.0477848	1539	1400	-1.10011	0.0488168	B	TRINITY_DN77856_c2_g1_i3	XP_001020922.3	1.1e-32	ABC transporter family protein [Tetrahymena thermophila SB210]	TRINITY_DN77856_c2_g1_i7	Q80W57.1	3.41e-28	RecName: Full=ATP-binding cassette sub-family G member 2; AltName: Full=Breast cancer resistance protein 1 homolog; AltName: Full=Urate exporter; AltName: CD_antigen=CD338	TRINITY_DN77856_c2_g1_i3	AT5G06530.3	3.2e-29	ABC transporter G family member 22 [Source:UniProtKB/Swiss-Prot;Acc:Q93YS4]	TRINITY_DN77856_c2_g1_i3	EDP03608	2.39e-27	Predicted protein [Source:UniProtKB/TrEMBL;Acc:A8IVZ2]	TRINITY_DN77856_c2_g1_i3	BAA18655	4.6e-17	sulfate transport system permease protein	TRINITY_DN77856_c2_g1_i3	ENSP00000426917.1	1.68e-25	ATP binding cassette subfamily G member 2 (Junior blood group) [Source:HGNC Symbol;Acc:HGNC:74]	TRINITY_DN77856_c2_g1_i3	EAN78143	3.32e-26	ATP-binding cassette protein, putative
TRINITY_DN77877_c3_g2	125	94	-1.33333	0.0448936	127	95	-1.33869	0.0224593	B	TRINITY_DN77877_c3_g2_i10	XP_003054979.1	3.52e-19	hypothetical protein MICPUCDRAFT_50248 [Micromonas pusilla CCMP1545]	TRINITY_DN77877_c3_g2_i8	D3ZRW8.1	4.59e-07	RecName: Full=Ethanolamine kinase 2; Short=EKI 2; AltName: Full=Ethanolamine kinase-like protein
TRINITY_DN77978_c0_g1	1082	1189	1.099	0.0218781	1095	1199	1.095	0.0429231	B	TRINITY_DN77978_c0_g1_i4	XP_002681338.1	0	sec61-like protein [Naegleria gruberi]	TRINITY_DN77978_c0_g1_i4	Q54XK2.1	0	RecName: Full=Protein transport protein Sec61 subunit alpha; AltName: Full=Secretory 61 complex subunit alpha	TRINITY_DN77978_c0_g1_i4	AT2G34250.1	0	AT2G34250 protein [Source:UniProtKB/TrEMBL;Acc:O80774]	TRINITY_DN77978_c0_g1_i4	EDP05993	0	SEC61-alpha subunit of ER-translocon [Source:UniProtKB/TrEMBL;Acc:A8IEL6]					TRINITY_DN77978_c0_g1_i4	ENSP00000418493.1	0	Sec61 translocon alpha 1 subunit [Source:HGNC Symbol;Acc:HGNC:18276]	TRINITY_DN77978_c0_g1_i4	EAN79585	0	pretranslocation protein, alpha subunit, putative
TRINITY_DN78023_c9_g1	146	82	-1.77936	1.04903e-05	148	83	-1.78253	1.49164e-05	B
TRINITY_DN78056_c2_g1	98	134	1.362	0.0122973	100	135	1.356	0.00359442	B	TRINITY_DN78056_c2_g1_i10	WP_091855572.1	3.84e-10	hypothetical protein [Bosea robiniae]	TRINITY_DN78056_c2_g1_i10	Q6GBR4.1	1.4e-06	RecName: Full=Putative proline/betaine transporter
TRINITY_DN78076_c5_g2	920	752	-1.22249	3.45319e-05	932	759	-1.22699	0.000210116	B
TRINITY_DN78160_c16_g1	9504	10410	1.095	0.00410752	9622	10502	1.091	0.0182901	B	TRINITY_DN78160_c16_g1_i1	BAD44718.1	1.1e-20	alpha-type IP39 [Euglena gracilis]
TRINITY_DN78160_c9_g2	25472	27883	1.095	0.000690414	25785	28131	1.091	0.00219845	B	TRINITY_DN78160_c9_g2_i3	BAD44718.1	1.71e-86	alpha-type IP39 [Euglena gracilis]
TRINITY_DN78160_c9_g4	35229	37639	1.068	0.0331742	35665	37973	1.065	0.0477042	B	TRINITY_DN78160_c9_g4_i1	BAD44719.1	4.77e-48	beta-type IP39 [Euglena gracilis]
TRINITY_DN78168_c4_g1	15565	17348	1.115	3.59389e-08	15757	17502	1.111	6.25531e-06	B	TRINITY_DN78168_c4_g1_i5	XP_002177890.1	0	predicted protein [Phaeodactylum tricornutum CCAP 1055/1]	TRINITY_DN78168_c4_g1_i6	Q6TU48.1	1.26e-156	RecName: Full=NADP-dependent malic enzyme; Short=NADP-ME; AltName: Full=SrfA-induced gene A protein	TRINITY_DN78168_c4_g1_i6	AT4G00570.1	1.15e-147	NAD-dependent malic enzyme 2, mitochondrial [Source:UniProtKB/Swiss-Prot;Acc:Q8L7K9]	TRINITY_DN78168_c4_g1_i6	EDP08217	7.58e-149	NAD malic enzyme [Source:UniProtKB/TrEMBL;Acc:A8HWC2]	TRINITY_DN78168_c4_g1_i6	BAA16663	1.39e-22	malic enzyme	TRINITY_DN78168_c4_g1_i6	ENSP00000358719.3	9.61e-137	malic enzyme 1 [Source:HGNC Symbol;Acc:HGNC:6983]	TRINITY_DN78168_c4_g1_i6	EAN79508	3.64e-124	malic enzyme, putative
TRINITY_DN78168_c4_g3	35609	39963	1.122	4.10557e-05	36054	40319	1.118	0.000256361	B	TRINITY_DN78168_c4_g3_i2	XP_009042683.1	1.8e-30	hypothetical protein AURANDRAFT_35069, partial [Aureococcus anophagefferens]	TRINITY_DN78168_c4_g3_i2	P78715.1	4.05e-31	RecName: Full=Malic enzyme, hydrogenosomal; Short=ME; Flags: Precursor	TRINITY_DN78168_c4_g3_i2	AT2G13560.1	1.38e-24	NAD-dependent malic enzyme 1, mitochondrial [Source:UniProtKB/Swiss-Prot;Acc:Q9SIU0]	TRINITY_DN78168_c4_g3_i2	EDP08217	1.86e-25	NAD malic enzyme [Source:UniProtKB/TrEMBL;Acc:A8HWC2]					TRINITY_DN78168_c4_g3_i2	ENSP00000321070.5	1.08e-21	malic enzyme 2 [Source:HGNC Symbol;Acc:HGNC:6984]	TRINITY_DN78168_c4_g3_i2	EAN79508	4.33e-18	malic enzyme, putative
TRINITY_DN78174_c0_g1	480	418	-1.14943	0.0288874	486	422	-1.1534	0.0169473	B	TRINITY_DN78174_c0_g1_i7	XP_012658209.1	4.12e-22	PREDICTED: multiple C2 and transmembrane domain-containing protein 1 isoform X2 [Otolemur garnettii]	TRINITY_DN78174_c0_g1_i6	D4ABL6.4	1.87e-15	RecName: Full=Multiple C2 and transmembrane domain-containing protein 1	TRINITY_DN78174_c0_g1_i6	AT5G47710.4	4.3e-12	Protein C2-DOMAIN ABA-RELATED 11 [Source:UniProtKB/Swiss-Prot;Acc:Q9FIK8]	TRINITY_DN78174_c0_g1_i6	EDP04972	5.16e-09	Predicted protein [Source:UniProtKB/TrEMBL;Acc:A8IN25]					TRINITY_DN78174_c0_g1_i6	ENSP00000423410.1	1.46e-23	multiple C2 and transmembrane domain containing 1 [Source:HGNC Symbol;Acc:HGNC:26183]	TRINITY_DN78174_c0_g1_i7	AAZ13572	5.62e-10	hypothetical protein, conserved
TRINITY_DN78355_c0_g1	188	142	-1.31926	0.0236051	191	144	-1.3245	0.0124835	B
TRINITY_DN78442_c2_g1	430	515	1.197	0.000987483	435	520	1.193	0.0013144	B	TRINITY_DN78442_c2_g1_i3	OJJ69561.1	1.34e-31	hypothetical protein ASPBRDRAFT_32389 [Aspergillus brasiliensis CBS 101740]
TRINITY_DN78444_c0_g1	58	330	5.629	2.48196e-82	59	333	5.603	4.85346e-84	B	TRINITY_DN78444_c0_g1_i1	KWU47406.1	1.42e-147	ribosomal protein S7 [Rhodotorula sp. JG-1b]	TRINITY_DN78444_c0_g1_i1	Q7RVI1.2	9.61e-113	RecName: Full=40S ribosomal protein S5	TRINITY_DN78444_c0_g1_i1	AT3G11940.2	6.16e-102	40S ribosomal protein S5-2 [Source:UniProtKB/Swiss-Prot;Acc:P51427]	TRINITY_DN78444_c0_g1_i1	EDP01658	1.84e-100	Ribosomal protein S5 [Source:UniProtKB/TrEMBL;Acc:A8J2I5]					TRINITY_DN78444_c0_g1_i1	ENSP00000196551.3	2.55e-100	ribosomal protein S5 [Source:HGNC Symbol;Acc:HGNC:10426]	TRINITY_DN78444_c0_g1_i1	EAN79592	7.5e-86	40S ribosomal protein S5, putative
TRINITY_DN78463_c1_g1	1446	1216	-1.18906	1.79005e-06	1464	1226	-1.19332	1.71213e-05	B	TRINITY_DN78463_c1_g1_i2	WP_026869258.1	3.62e-57	3-isopropylmalate dehydratase small subunit [Inquilinus limosus]	TRINITY_DN78463_c1_g1_i2	Q5LX07.1	3.58e-55	RecName: Full=3-isopropylmalate dehydratase small subunit; AltName: Full=Alpha-IPM isomerase; Short=IPMI; AltName: Full=Isopropylmalate isomerase					TRINITY_DN78463_c1_g1_i2	EDP08379	3.29e-07	Isopropylmalate dehydratase, small subunit [Source:UniProtKB/TrEMBL;Acc:A8HYG8]	TRINITY_DN78463_c1_g1_i2	BAA18298	6.2e-13	3-isopropylmalate dehydratase
TRINITY_DN78491_c1_g1	769	614	-1.25313	4.00273e-05	779	619	-1.25786	0.000255909	B	TRINITY_DN78491_c1_g1_i19	WP_082583901.1	2.36e-49	hypothetical protein [Noviherbaspirillum sp. Root189]	TRINITY_DN78491_c1_g1_i21	Q54YZ9.2	6.19e-35	RecName: Full=Hybrid signal transduction histidine kinase J	TRINITY_DN78491_c1_g1_i21	AT1G27320.1	1.17e-30	HK3 [Source:UniProtKB/TrEMBL;Acc:A0A178WL02]	TRINITY_DN78491_c1_g1_i22	EDP06651	6.42e-33	Predicted protein [Source:UniProtKB/TrEMBL;Acc:A8IAL5]	TRINITY_DN78491_c1_g1_i19	BAA17998	2.19e-40	hybrid sensory kinase
TRINITY_DN78584_c0_g1	621	538	-1.15207	0.0173977	629	543	-1.15741	0.0214181	B
TRINITY_DN78611_c0_g1	585	734	1.256	0.0397967	593	741	1.251	0.00818608	B					TRINITY_DN78611_c0_g1_i3	P40507.1	2.82e-07	RecName: Full=Protein AIR1; AltName: Full=Arginine methyltransferase-interacting RING finger protein 1	TRINITY_DN78611_c0_g1_i3	AT5G52380.1	1.82e-06	At5g52380 [Source:UniProtKB/TrEMBL;Acc:Q9FHC2]
TRINITY_DN78656_c2_g1	11	126	10.945	3.07648e-46	12	127	10.81	1.76187e-50	B	TRINITY_DN78656_c2_g1_i2	KWU42447.1	2.12e-33	NADH-ubiquinone oxidoreductase B12 subunit [Rhodotorula sp. JG-1b]	TRINITY_DN78656_c2_g1_i2	Q9M9R9.1	5.6e-08	RecName: Full=NADH dehydrogenase [ubiquinone] 1 beta subcomplex subunit 3-B	TRINITY_DN78656_c2_g1_i2	AT1G14450.1	6.62e-09	NADH dehydrogenase (ubiquinone)s [Source:TAIR;Acc:AT1G14450]	TRINITY_DN78656_c2_g1_i2	EDP07174	2.87e-11	Mitochondrial putative NADH:ubiquinone oxidoreductase 6.5 kDa subunit [Source:UniProtKB/TrEMBL;Acc:Q6QIV8]					TRINITY_DN78656_c2_g1_i2	ENSP00000407336.1	3.97e-07	NADH:ubiquinone oxidoreductase subunit B3 [Source:HGNC Symbol;Acc:HGNC:7698]
TRINITY_DN78684_c3_g1	169	107	-1.56986	6.75267e-05	171	108	-1.5748	4.34833e-05	B	TRINITY_DN78684_c3_g1_i1	CUG34590.1	2.62e-21	receptor-type adenylate cyclase, putative [Bodo saltans]	TRINITY_DN78684_c3_g1_i1	Q25263.1	5.69e-21	RecName: Full=Receptor-type adenylate cyclase B; AltName: Full=ATP pyrophosphate-lyase; AltName: Full=Adenylyl cyclase					TRINITY_DN78684_c3_g1_i1	EDP09361	4.44e-10	Predicted protein [Source:UniProtKB/TrEMBL;Acc:A8HQV2]									TRINITY_DN78684_c3_g1_i1	EAN80318	5.25e-23	receptor-type adenylate cyclase GRESAG 4, putative
TRINITY_DN78695_c2_g1	366	424	1.158	0.0278327	371	428	1.154	0.0190405	B	TRINITY_DN78695_c2_g1_i3	XP_014235507.1	7.73e-15	PREDICTED: dual specificity protein phosphatase 3-like isoform X2 [Trichogramma pretiosum]	TRINITY_DN78695_c2_g1_i3	Q9ZR37.1	4.09e-11	RecName: Full=Dual specificity protein phosphatase 1; Short=AtDsPTP1	TRINITY_DN78695_c2_g1_i3	AT3G23610.2	2.25e-13	dual specificity protein phosphatase 1 [Source:TAIR;Acc:AT3G23610]	TRINITY_DN78695_c2_g1_i3	EDO96325	1.16e-11	Predicted protein [Source:UniProtKB/TrEMBL;Acc:A8JIF9]					TRINITY_DN78695_c2_g1_i3	ENSP00000226004.2	9.38e-11	dual specificity phosphatase 3 [Source:HGNC Symbol;Acc:HGNC:3069]	TRINITY_DN78695_c2_g1_i3	EAN77591	2.12e-09	dual specificity protein phosphatase, putative
TRINITY_DN78790_c5_g2	1113	904	-1.23153	4.79208e-07	1127	912	-1.23457	3.4019e-06	B
TRINITY_DN78928_c0_g4	218	174	-1.25	0.0361301	221	176	-1.25471	0.0147167	B
TRINITY_DN78946_c2_g4	159	118	-1.34771	0.00485949	161	119	-1.35318	0.000707517	B
TRINITY_DN79059_c0_g1	120	68	-1.75439	2.42928e-06	122	69	-1.76056	7.41165e-07	B
TRINITY_DN79088_c1_g1	1198	1068	-1.12108	0.0171622	1212	1078	-1.12486	0.0238312	B	TRINITY_DN79088_c1_g1_i16	XP_005843611.1	4.99e-08	hypothetical protein CHLNCDRAFT_140196 [Chlorella variabilis]
TRINITY_DN79099_c1_g2	159	116	-1.37174	0.0111006	161	117	-1.37741	0.00561853	B
TRINITY_DN79115_c1_g1	270	319	1.183	0.0237077	273	322	1.179	0.00585139	B
TRINITY_DN79116_c0_g1	289	169	-1.70648	0.000270611	294	171	-1.71233	1.21942e-06	B
TRINITY_DN79213_c5_g1	144	99	-1.46199	0.00132246	146	100	-1.46628	0.000329264	B
TRINITY_DN79221_c1_g3	591	487	-1.21507	0.000428033	599	491	-1.21951	0.000824842	B	TRINITY_DN79221_c1_g3_i2	XP_015794469.1	7.86e-12	PREDICTED: mitogen-activated protein kinase kinase kinase 13-like [Tetranychus urticae]	TRINITY_DN79221_c1_g3_i1	Q8T0S6.1	2.03e-11	RecName: Full=Serine/threonine-protein kinase hippo; AltName: Full=Drosophila homolog of MST1 and MST2; AltName: Full=STE20-like kinase MST; AltName: Full=dMST	TRINITY_DN79221_c1_g3_i1	AT1G53570.6	2.25e-11	Mitogen-activated protein kinase kinase kinase 3 [Source:UniProtKB/Swiss-Prot;Acc:F4HRJ4]	TRINITY_DN79221_c1_g3_i1	EDP04222	4.34e-10	Aurora-like kinase [Source:UniProtKB/TrEMBL;Acc:A8ISU1]					TRINITY_DN79221_c1_g3_i1	ENSP00000345434.5	1.53e-11	mitogen-activated protein kinase kinase kinase kinase 3 [Source:HGNC Symbol;Acc:HGNC:6865]	TRINITY_DN79221_c1_g3_i1	AAZ12422	1.38e-12	protein kinase, putative
TRINITY_DN79253_c2_g2	115	74	-1.54799	0.000262137	116	75	-1.55039	4.22251e-05	B	TRINITY_DN79253_c2_g2_i2	OIW15357.1	7.89e-17	hypothetical protein TanjilG_26730 [Lupinus angustifolius]	TRINITY_DN79253_c2_g2_i2	P51166.1	1.26e-14	RecName: Full=Cyclin-dependent-like kinase 5; AltName: Full=Cell division protein kinase 5; AltName: Full=Neuronal cyclin-dependent kinase 5	TRINITY_DN79253_c2_g2_i2	AT2G40120.1	2.95e-13	Hypothetical Ser-Thr protein kinase [Source:UniProtKB/TrEMBL;Acc:Q9XEE4]	TRINITY_DN79253_c2_g2_i2	EDP05715	2.92e-15	NimA-related protein kinase 8 [Source:UniProtKB/TrEMBL;Acc:A8IHF8]	TRINITY_DN79253_c2_g2_i2	BAA18552	3.16e-08	serine/threonine protein kinase	TRINITY_DN79253_c2_g2_i2	ENSP00000419782.1	5.13e-15	cyclin dependent kinase 5 [Source:HGNC Symbol;Acc:HGNC:1774]	TRINITY_DN79253_c2_g2_i2	EAN77537	1.76e-15	cell division protein kinase 2 homolog 1
TRINITY_DN79273_c2_g1	300	232	-1.29199	0.00148877	304	234	-1.29702	0.00052406	B	TRINITY_DN79273_c2_g1_i3	XP_014159095.1	1.01e-36	hypothetical protein SARC_02612 [Sphaeroforma arctica JP610]	TRINITY_DN79273_c2_g1_i3	P19485.2	1.09e-26	RecName: Full=Adenylate cyclase 1; AltName: Full=ATP pyrophosphate-lyase 1; AltName: Full=Adenylyl cyclase 1					TRINITY_DN79273_c2_g1_i7	EDP08107	1.14e-07	Guanylate cyclase [Source:UniProtKB/TrEMBL;Acc:A8I1G7]	TRINITY_DN79273_c2_g1_i7	BAA16969	1.17e-15	adenylate cyclase	TRINITY_DN79273_c2_g1_i9	ENSP00000254854.4	6.64e-06	guanylate cyclase 2D, retinal [Source:HGNC Symbol;Acc:HGNC:4689]
TRINITY_DN79277_c5_g1	3159	3650	1.155	1.76161e-09	3198	3682	1.151	5.53182e-07	B	TRINITY_DN79277_c5_g1_i10	XP_002313723.2	8.13e-18	hypothetical protein POPTR_0009s13460g [Populus trichocarpa]	TRINITY_DN79277_c5_g1_i4	P27484.1	1.45e-14	RecName: Full=Glycine-rich protein 2	TRINITY_DN79277_c5_g1_i10	AT2G17870.1	4.68e-14	Cold shock domain-containing protein 3 [Source:UniProtKB/Swiss-Prot;Acc:Q94C69]	TRINITY_DN79277_c5_g1_i4	EDP08495	3.78e-06	Nucleic acid binding protein [Source:UniProtKB/TrEMBL;Acc:Q8GV23]					TRINITY_DN79277_c5_g1_i10	ENSP00000489735.1	3.14e-08	lin-28 homolog B [Source:HGNC Symbol;Acc:HGNC:32207]	TRINITY_DN79277_c5_g1_i4	EAN79753	5.14e-12	mitochondrial RNA binding protein
TRINITY_DN79287_c2_g1	146	84	-1.73913	2.76725e-07	148	84	-1.7452	4.38218e-08	B
TRINITY_DN79288_c1_g2	864	615	-1.40647	0.0245697	874	620	-1.41044	0.000529404	B
TRINITY_DN79288_c1_g4	9762	10486	1.074	0.00513278	9883	10579	1.07	0.0235408	B	TRINITY_DN79288_c1_g4_i1	AAF71706.1	0	elongation factor 2, partial [Euglena gracilis]	TRINITY_DN79288_c1_g4_i1	Q754C8.1	2.59e-142	RecName: Full=Elongation factor 2; Short=EF-2	TRINITY_DN79288_c1_g4_i1	AT1G56070.1	3.91e-140	Elongation factor 2 [Source:UniProtKB/Swiss-Prot;Acc:Q9ASR1]	TRINITY_DN79288_c1_g4_i1	EDO96511	5.87e-141	Elongation factor 2 [Source:UniProtKB/TrEMBL;Acc:A8JHX9]	TRINITY_DN79288_c1_g4_i3	BAA16764	8.36e-23	elongation factor EF-G	TRINITY_DN79288_c1_g4_i1	ENSP00000307940.5	2.43e-120	eukaryotic translation elongation factor 2 [Source:HGNC Symbol;Acc:HGNC:3214]	TRINITY_DN79288_c1_g4_i1	EAN77875	3.04e-164	elongation factor 2
TRINITY_DN79294_c0_g2	122	161	1.328	0.0154647	123	163	1.323	0.00642379	B
TRINITY_DN79341_c5_g1	548	657	1.198	0.000381128	555	662	1.194	0.000939923	B
TRINITY_DN79341_c5_g4	14385	15442	1.073	0.013174	14564	15579	1.07	0.0434911	B	TRINITY_DN79341_c5_g4_i1	BAD44718.1	1.72e-07	alpha-type IP39 [Euglena gracilis]
TRINITY_DN79355_c3_g1	7524	8126	1.08	0.00985606	7616	8197	1.076	0.0301175	B	TRINITY_DN79355_c3_g1_i2	EFX84211.1	2.55e-28	hypothetical protein DAPPUDRAFT_301332 [Daphnia pulex]	TRINITY_DN79355_c3_g1_i2	P17078.3	2.71e-29	RecName: Full=60S ribosomal protein L35	TRINITY_DN79355_c3_g1_i2	AT2G39390.1	3.33e-26	60S ribosomal protein L35-2 [Source:UniProtKB/Swiss-Prot;Acc:O80626]	TRINITY_DN79355_c3_g1_i2	EDP09570	6.01e-16	Ribosomal protein L35 [Source:UniProtKB/TrEMBL;Acc:A8HNX3]					TRINITY_DN79355_c3_g1_i2	ENSP00000259469.4	1.19e-29	ribosomal protein L35 [Source:HGNC Symbol;Acc:HGNC:10344]	TRINITY_DN79355_c3_g1_i2	EAN76301	6.11e-20	60S ribosomal protein L35, putative
TRINITY_DN79396_c1_g1	115	71	-1.6129	0.000347505	116	72	-1.61812	0.000226446	B
TRINITY_DN79427_c3_g1	174	129	-1.3459	0.00387095	176	130	-1.34953	0.000740655	B	TRINITY_DN79427_c3_g1_i1	KFK29863.1	1.43e-33	hypothetical protein AALP_AA7G188700 [Arabis alpina]					TRINITY_DN79427_c3_g1_i1	AT1G16080.1	2.61e-34	Putative uncharacterized protein At1g16080 [Source:UniProtKB/TrEMBL;Acc:Q9S9M7]	TRINITY_DN79427_c3_g1_i1	EDP05665	8.17e-28	Predicted protein [Source:UniProtKB/TrEMBL;Acc:A8IGI0]
TRINITY_DN79468_c0_g1	241	194	-1.24688	0.0198484	244	195	-1.25156	0.00607309	B
TRINITY_DN79522_c0_g1	110	73	-1.51515	0.0132863	112	73	-1.51976	0.0115171	B
TRINITY_DN79533_c1_g1	100	61	-1.63132	0.0010646	101	62	-1.63399	0.000890214	B	TRINITY_DN79533_c1_g1_i1	XP_019259835.1	6.81e-28	PREDICTED: serine/threonine-protein kinase HT1-like [Nicotiana attenuata]	TRINITY_DN79533_c1_g1_i1	Q2MHE4.1	2.98e-28	RecName: Full=Serine/threonine-protein kinase HT1; AltName: Full=High leaf temperature protein 1	TRINITY_DN79533_c1_g1_i1	AT1G62400.1	3.53e-29	Serine/threonine-protein kinase HT1 [Source:UniProtKB/Swiss-Prot;Acc:Q2MHE4]	TRINITY_DN79533_c1_g1_i1	EDP07092	5.9e-26	Predicted protein [Source:UniProtKB/TrEMBL;Acc:A8I6W6]	TRINITY_DN79533_c1_g1_i1	BAA17235	2.55e-08	serine/threonine protein kinase	TRINITY_DN79533_c1_g1_i1	ENSP00000309597.3	7.44e-21	mitogen-activated protein kinase kinase kinase 11 [Source:HGNC Symbol;Acc:HGNC:6850]	TRINITY_DN79533_c1_g1_i1	AAZ12422	1.54e-16	protein kinase, putative
TRINITY_DN79539_c0_g1	7248	7978	1.101	9.94093e-06	7337	8048	1.097	0.000402735	B	TRINITY_DN79539_c0_g1_i1	AAX13964.1	0	chloroplast phosphoribulokinase [Euglena gracilis]	TRINITY_DN79539_c0_g1_i10	P19824.1	1.02e-134	RecName: Full=Phosphoribulokinase, chloroplastic; Short=PRK; Short=PRKase; AltName: Full=Phosphopentokinase; Flags: Precursor	TRINITY_DN79539_c0_g1_i10	AT1G32060.1	1.19e-133	Phosphoribulokinase [Source:UniProtKB/TrEMBL;Acc:A0A178WLP9]	TRINITY_DN79539_c0_g1_i10	EDP02974	3.81e-136	Phosphoribulokinase, chloroplastic [Source:UniProtKB/Swiss-Prot;Acc:P19824]	TRINITY_DN79539_c0_g1_i10	BAA18458	1.07e-125	phosphoribulokinase	TRINITY_DN79539_c0_g1_i1	ENSP00000346155.6	6.9e-13	uridine-cytidine kinase 1 like 1 [Source:HGNC Symbol;Acc:HGNC:15938]
TRINITY_DN79576_c0_g2	320	374	1.168	0.0346134	324	377	1.164	0.022931	B
TRINITY_DN79628_c0_g2	1061	934	-1.13636	0.00542455	1074	942	-1.14025	0.00838828	B
TRINITY_DN79648_c3_g1	27365	30558	1.117	0.00281752	27706	30831	1.113	0.0079126	B	TRINITY_DN79648_c3_g1_i5	OGO77302.1	8.15e-15	zinc-binding protein [Clostridiales bacterium GWB2_37_7]
TRINITY_DN79648_c3_g5	240	187	-1.28205	0.0051912	243	189	-1.287	0.00119776	B
TRINITY_DN79663_c3_g2	78	108	1.375	0.0196637	79	108	1.37	0.00727246	B	TRINITY_DN79663_c3_g2_i4	KWU47547.1	0	hypothetical protein RHOSPDRAFT_30976 [Rhodotorula sp. JG-1b]
TRINITY_DN79698_c0_g1	139	90	-1.54321	0.000751207	141	91	-1.54799	0.000478545	B	TRINITY_DN79698_c0_g1_i2	OJJ20075.1	1.34e-10	hypothetical protein BKI52_16510 [marine bacterium AO1-C]
TRINITY_DN79722_c2_g1	143	97	-1.47493	0.00793353	145	98	-1.47929	0.0065912	B	TRINITY_DN79722_c2_g1_i12	OLE32868.1	2.82e-10	hypothetical protein AUG47_05535 [Alphaproteobacteria bacterium 13_1_20CM_3_64_12]	TRINITY_DN79722_c2_g1_i3	Q10029.2	2.67e-09	RecName: Full=Receptor-type guanylate cyclase gcy-2; Flags: Precursor					TRINITY_DN79722_c2_g1_i12	EDP00254	2.4e-10	Guanylate cyclase [Source:UniProtKB/TrEMBL;Acc:A8J745]					TRINITY_DN79722_c2_g1_i12	ENSP00000341083.2	3.45e-09	natriuretic peptide receptor 2 [Source:HGNC Symbol;Acc:HGNC:7944]
TRINITY_DN79772_c1_g2	2086	1909	-1.0929	0.0135126	2111	1926	-1.09649	0.0159513	B	TRINITY_DN79772_c1_g2_i8	XP_005782625.1	2.47e-15	hypothetical protein EMIHUDRAFT_113418, partial [Emiliania huxleyi CCMP1516]	TRINITY_DN79772_c1_g2_i7	A2AVA0.1	2.28e-07	RecName: Full=Sushi, von Willebrand factor type A, EGF and pentraxin domain-containing protein 1; AltName: Full=Polydom; Flags: Precursor													TRINITY_DN79772_c1_g2_i2	ENSP00000417874.1	9.2e-08	vitrin [Source:HGNC Symbol;Acc:HGNC:12697]
TRINITY_DN79791_c2_g1	1762	1612	-1.0929	0.0215413	1784	1627	-1.09649	0.0269262	B
TRINITY_DN79865_c1_g1	2388	2747	1.15	1.65956e-06	2418	2771	1.146	3.27127e-05	B	TRINITY_DN79865_c1_g1_i2	OLP86687.1	1.33e-22	Elongation factor 2 [Symbiodinium microadriaticum]	TRINITY_DN79865_c1_g1_i12	Q8RWQ5.1	5.55e-08	RecName: Full=Probable folate-biopterin transporter 4	TRINITY_DN79865_c1_g1_i12	AT5G54860.1	6.57e-09	Probable folate-biopterin transporter 4 [Source:UniProtKB/Swiss-Prot;Acc:Q8RWQ5]
TRINITY_DN79919_c4_g3	103	141	1.368	0.0105196	104	142	1.363	0.00375101	B
TRINITY_DN79970_c2_g1	948	1092	1.153	0.0161428	960	1102	1.149	0.0309564	B													TRINITY_DN79970_c2_g1_i1	EDP08357	8.64e-06	Nuclear pre-mRNA splicing factor, component of splicing factor 3b [Source:UniProtKB/TrEMBL;Acc:A8HY93]
TRINITY_DN79973_c0_g2	324	236	-1.37552	0.000187597	328	238	-1.38122	0.000221365	B
TRINITY_DN79973_c0_g3	252	206	-1.22249	0.018754	255	207	-1.22699	0.00335234	B	TRINITY_DN79973_c0_g3_i1	XP_004337150.1	6.45e-25	MIF4G domain containing protein [Acanthamoeba castellanii str. Neff]	TRINITY_DN79973_c0_g3_i1	O82233.1	1.31e-21	RecName: Full=Eukaryotic translation initiation factor isoform 4G-2; Short=eIF(iso)4G-2	TRINITY_DN79973_c0_g3_i1	AT2G24050.1	1.55e-22	Eukaryotic translation initiation factor isoform 4G-2 [Source:UniProtKB/Swiss-Prot;Acc:O82233]	TRINITY_DN79973_c0_g3_i1	EDP04765	1.01e-17	Predicted protein [Source:UniProtKB/TrEMBL;Acc:A8IQZ3]					TRINITY_DN79973_c0_g3_i6	ENSP00000383274.2	5.15e-20	eukaryotic translation initiation factor 4 gamma 3 [Source:HGNC Symbol;Acc:HGNC:3298]	TRINITY_DN79973_c0_g3_i6	AAZ11264	5.69e-13	hypothetical protein, conserved
TRINITY_DN80030_c3_g5	11381	12304	1.081	0.00620319	11521	12413	1.077	0.0206423	B	TRINITY_DN80030_c3_g5_i3	OLP87595.1	7.64e-84	Mitochondrial 2-oxodicarboxylate carrier 2 [Symbiodinium microadriaticum]	TRINITY_DN80030_c3_g5_i3	Q99297.1	2.83e-14	RecName: Full=Mitochondrial 2-oxodicarboxylate carrier 2	TRINITY_DN80030_c3_g5_i3	AT5G19760.1	1.18e-09	Mitochondrial dicarboxylate/tricarboxylate transporter DTC [Source:UniProtKB/Swiss-Prot;Acc:Q9C5M0]	TRINITY_DN80030_c3_g5_i3	EDP02403	7.74e-12	Predicted protein [Source:UniProtKB/TrEMBL;Acc:A8J0L0]					TRINITY_DN80030_c3_g5_i3	ENSP00000359058.4	1.45e-07	solute carrier family 25 member 24 [Source:HGNC Symbol;Acc:HGNC:20662]	TRINITY_DN80030_c3_g5_i4	EAN79492	4.72e-06	mitochondrial carrier protein, putative
TRINITY_DN80039_c0_g1	101	72	-1.39276	0.0263328	102	73	-1.39665	0.0110205	B	TRINITY_DN80039_c0_g1_i4	OLP81914.1	4.58e-14	putative E3 ubiquitin-protein ligase HERC2 [Symbiodinium microadriaticum]	TRINITY_DN80039_c0_g1_i2	O95199.1	2.04e-10	RecName: Full=RCC1 and BTB domain-containing protein 2; AltName: Full=Chromosome condensation 1-like; Short=CHC1-L; AltName: Full=RCC1-like G exchanging factor; AltName: Full=Regulator of chromosome condensation and BTB domain-containing protein 2	TRINITY_DN80039_c0_g1_i2	AT5G63860.1	2.99e-07	Ultraviolet-B receptor UVR8 [Source:UniProtKB/Swiss-Prot;Acc:Q9FN03]	TRINITY_DN80039_c0_g1_i2	EDO97078	7.64e-08	Regulator of chromosome condensation (RCC1) family protein [Source:Projected from Arabidopsis thaliana (AT5G63860) TAIR;Acc:AT5G63860]					TRINITY_DN80039_c0_g1_i2	ENSP00000389910.2	4.41e-11	RCC1 and BTB domain containing protein 2 [Source:HGNC Symbol;Acc:HGNC:1914]	TRINITY_DN80039_c0_g1_i2	AAZ12696	8.86e-09	hypothetical protein, conserved
TRINITY_DN80043_c2_g1	172	134	-1.28205	0.0403708	174	135	-1.287	0.016669	B
TRINITY_DN80068_c0_g1	152	198	1.307	0.0351923	154	200	1.303	0.0245792	B
TRINITY_DN80069_c1_g1	431	372	-1.16009	0.0299233	436	375	-1.16414	0.0174854	B	TRINITY_DN80069_c1_g1_i19	WP_090254565.1	1.74e-68	glutathione peroxidase [Ectothiorhodospira marina]	TRINITY_DN80069_c1_g1_i19	P74250.1	2.11e-58	RecName: Full=Hydroperoxy fatty acid reductase gpx1	TRINITY_DN80069_c1_g1_i16	AT2G31570.1	7.29e-56	Probable glutathione peroxidase 2 [Source:UniProtKB/Swiss-Prot;Acc:O04922]	TRINITY_DN80069_c1_g1_i19	EDP03176	2.03e-56	Glutathione peroxidase [Source:UniProtKB/TrEMBL;Acc:A8IWW7]	TRINITY_DN80069_c1_g1_i19	BAA18344	1.36e-60	glutathione peroxidase	TRINITY_DN80069_c1_g1_i19	ENSP00000354677.4	2.05e-38	glutathione peroxidase 7 [Source:HGNC Symbol;Acc:HGNC:4559]	TRINITY_DN80069_c1_g1_i19	AAZ12179	7.25e-50	trypanothione/tryparedoxin dependent peroxidase 3
TRINITY_DN80082_c3_g2	259	210	-1.23153	0.0110856	262	212	-1.23609	0.00167218	B
TRINITY_DN80132_c2_g1	1182	1473	1.247	3.05964e-12	1197	1486	1.242	1.08516e-09	B	TRINITY_DN80132_c2_g1_i4	CDP21514.1	8.67e-13	unnamed protein product, partial [Coffea canephora]	TRINITY_DN80132_c2_g1_i4	Q96303.1	9.91e-13	RecName: Full=Inorganic phosphate transporter 1-4; Short=AtPht1;4; AltName: Full=H(+)/Pi cotransporter	TRINITY_DN80132_c2_g1_i4	AT2G38940.1	1.17e-13	PHT1 [Source:UniProtKB/TrEMBL;Acc:A0A178VRB1]
TRINITY_DN80132_c2_g7	981	1265	1.291	6.34798e-13	993	1276	1.286	1.50155e-10	B	TRINITY_DN80132_c2_g7_i1	XP_013897766.1	4.87e-29	Inorganic phosphate transporter 1-6 [Monoraphidium neglectum]	TRINITY_DN80132_c2_g7_i1	Q7RVX9.2	4.95e-25	RecName: Full=Repressible high-affinity phosphate permease	TRINITY_DN80132_c2_g7_i1	AT1G20860.1	8.12e-23	phosphate transporter 1;8 [Source:TAIR;Acc:AT1G20860]	TRINITY_DN80132_c2_g7_i1	EDP04438	1.1e-07	Proton/phosphate symporter, splice variant b [Source:UniProtKB/TrEMBL;Acc:A8ISD6]
TRINITY_DN80172_c10_g1	154	192	1.249	0.0492519	156	194	1.244	0.0203681	B	TRINITY_DN80172_c10_g1_i7	XP_002181602.1	2.5e-28	predicted protein [Phaeodactylum tricornutum CCAP 1055/1]
TRINITY_DN80186_c2_g5	4770	5184	1.087	0.00437155	4829	5230	1.083	0.0213185	B
TRINITY_DN80187_c0_g4	118	85	-1.40647	0.0462097	120	85	-1.41044	0.0297188	B	TRINITY_DN80187_c0_g4_i2	WP_022911446.1	1.65e-25	alpha/beta hydrolase [Frankia sp. Iso899]	TRINITY_DN80187_c0_g4_i2	Q54528.1	6.85e-12	RecName: Full=Aclacinomycin methylesterase RdmC																	TRINITY_DN80187_c0_g4_i2	AAZ11353	1.7e-26	hydrolase, alpha/beta fold family, putative
TRINITY_DN80204_c2_g1	298	224	-1.32626	0.0103079	302	226	-1.33333	0.0112003	B	TRINITY_DN80204_c2_g1_i2	GAQ77581.1	4.94e-17	ABC transporter C family member 2 [Klebsormidium nitens]	TRINITY_DN80204_c2_g1_i2	Q9C8H0.1	1.04e-15	RecName: Full=ABC transporter C family member 12; Short=ABC transporter ABCC.12; Short=AtABCC12; AltName: Full=ATP-energized glutathione S-conjugate pump 13; AltName: Full=Glutathione S-conjugate-transporting ATPase 13; AltName: Full=Multidrug resistance-	TRINITY_DN80204_c2_g1_i2	AT1G30410.5	1.23e-16	multidrug resistance-associated protein 13 [Source:TAIR;Acc:AT1G30410]	TRINITY_DN80204_c2_g1_i2	EDP03509	4.35e-19	ABC transporter, multidrug resistance associated protein [Source:UniProtKB/TrEMBL;Acc:A8IW55]	TRINITY_DN80204_c2_g1_i2	BAA17573	3.27e-06	ABC transporter	TRINITY_DN80204_c2_g1_i2	ENSP00000311326.6	3.3e-14	ATP binding cassette subfamily C member 11 [Source:HGNC Symbol;Acc:HGNC:14639]	TRINITY_DN80204_c2_g1_i2	AAZ11039	1.33e-14	multidrug resistance protein E
TRINITY_DN80207_c1_g3	218	173	-1.25628	0.0117588	220	174	-1.26103	0.0014794	B	TRINITY_DN80207_c1_g3_i9	XP_002287536.1	4.37e-11	predicted protein [Thalassiosira pseudonana CCMP1335]	TRINITY_DN80207_c1_g3_i5	Q8C854.1	6.18e-09	RecName: Full=Myelin expression factor 2; Short=MEF-2; Short=MyEF-2					TRINITY_DN80207_c1_g3_i5	EDP00497	8.01e-07	Predicted protein [Source:UniProtKB/TrEMBL;Acc:A8J6M7]					TRINITY_DN80207_c1_g3_i5	ENSP00000452918.1	9.55e-10	myelin expression factor 2 [Source:HGNC Symbol;Acc:HGNC:17940]	TRINITY_DN80207_c1_g3_i11	EAN78473	2.82e-08	RNA-binding protein, putative
TRINITY_DN80207_c1_g4	163	118	-1.38889	0.00636411	166	118	-1.3947	0.00303374	B
TRINITY_DN80243_c1_g1	227	272	1.201	0.0310521	229	274	1.197	0.0078972	B
TRINITY_DN80245_c1_g1	737	867	1.176	0.000696472	746	874	1.172	0.00235218	B
TRINITY_DN80249_c5_g1	128	95	-1.35135	0.0171116	130	96	-1.35501	0.00365882	B	TRINITY_DN80249_c5_g1_i13	ORY87700.1	9.35e-20	hypothetical protein BCR37DRAFT_390230 [Protomyces lactucaedebilis]
TRINITY_DN80263_c3_g2	936	1069	1.141	0.00296653	948	1078	1.137	0.0078972	B	TRINITY_DN80263_c3_g2_i1	XP_012716738.1	3.61e-24	WD repeat-containing protein 54 [Fundulus heteroclitus]	TRINITY_DN80263_c3_g2_i1	Q9R0D8.1	9.1e-15	RecName: Full=WD repeat-containing protein 54													TRINITY_DN80263_c3_g2_i1	ENSP00000387236.1	1.31e-15	WD repeat domain 54 [Source:HGNC Symbol;Acc:HGNC:25770]	TRINITY_DN80263_c3_g2_i1	AAZ12636	4.08e-12	hypothetical protein, conserved
TRINITY_DN80271_c2_g1	23050	25162	1.092	0.0011464	23334	25384	1.088	0.00333901	B	TRINITY_DN80271_c2_g1_i6	WP_056126056.1	1.31e-74	MULTISPECIES: FMN-dependent NADH-azoreductase [Massilia]	TRINITY_DN80271_c2_g1_i6	Q47G91.1	1.07e-73	RecName: Full=FMN-dependent NADH-azoreductase; AltName: Full=Azo-dye reductase; AltName: Full=FMN-dependent NADH-azo compound oxidoreductase
TRINITY_DN80350_c1_g1	2299	1981	-1.16009	4.97139e-06	2328	1999	-1.16414	7.07385e-05	B	TRINITY_DN80350_c1_g1_i7	OYW29114.1	4.95e-12	hypothetical protein B7Z47_05135 [Chthoniobacter sp. 12-60-6]	TRINITY_DN80350_c1_g1_i4	A2AAJ9.2	2.64e-09	RecName: Full=Obscurin; AltName: Full=Obscurin-RhoGEF; AltName: Full=Obscurin-myosin light chain kinase; Short=Obscurin-MLCK	TRINITY_DN80350_c1_g1_i4	AT3G27580.1	1.6e-06	Serine/threonine-protein kinase D6PKL3 [Source:UniProtKB/Swiss-Prot;Acc:Q05999]	TRINITY_DN80350_c1_g1_i3	EDP05768	1.13e-08	NIMA-related kinase 5 [Source:UniProtKB/TrEMBL;Acc:Q6UPR1]					TRINITY_DN80350_c1_g1_i7	ENSP00000425662.1	1.15e-09	NIMA related kinase 11 [Source:HGNC Symbol;Acc:HGNC:18593]	TRINITY_DN80350_c1_g1_i7	AAZ10363	1.07e-06	protein kinase, putative
TRINITY_DN80366_c3_g1	3766	5527	1.468	1.01545e-10	3811	5576	1.463	3.55627e-17	B	TRINITY_DN80366_c3_g1_i2	SCV72917.1	6.98e-07	BQ2448_8155 [Microbotryum intermedium]									TRINITY_DN80366_c3_g1_i2	EDO95983	5.26e-07	Predicted protein [Source:UniProtKB/TrEMBL;Acc:A8JJG4]
TRINITY_DN80369_c3_g1	619	740	1.195	0.00213763	626	746	1.191	0.00505727	B	TRINITY_DN80369_c3_g1_i8	EPY23705.1	2.77e-18	S-phase kinase-associated protein 1 [Strigomonas culicis]									TRINITY_DN80369_c3_g1_i8	EDP05410	7.28e-06	E3 ubiquitin ligase [Source:UniProtKB/TrEMBL;Acc:A8IJ79]									TRINITY_DN80369_c3_g1_i8	EAN79575	2.97e-16	S-phase kinase-associated protein, putative
TRINITY_DN80419_c1_g1	3981	4329	1.087	0.00131548	4031	4367	1.083	0.011713	B	TRINITY_DN80419_c1_g1_i5	XP_005845811.1	9.86e-60	hypothetical protein CHLNCDRAFT_58489 [Chlorella variabilis]	TRINITY_DN80419_c1_g1_i5	O80832.1	4.2e-32	RecName: Full=UPF0187 protein At2g45870, chloroplastic; Flags: Precursor	TRINITY_DN80419_c1_g1_i5	AT2G45870.1	4.97e-33	UPF0187 protein At2g45870, chloroplastic [Source:UniProtKB/Swiss-Prot;Acc:O80832]	TRINITY_DN80419_c1_g1_i5	EDO99835	1.51e-56	Predicted protein [Source:UniProtKB/TrEMBL;Acc:A8J8S2]	TRINITY_DN80419_c1_g1_i5	BAA16943	1.03e-23
TRINITY_DN80458_c0_g2	1777	2093	1.178	1.69187e-09	1798	2112	1.174	1.30413e-07	B
TRINITY_DN80471_c3_g4	956	1086	1.136	0.00123993	968	1096	1.132	0.00431154	B
TRINITY_DN80499_c1_g2	4832	5192	1.074	0.00713829	4891	5238	1.071	0.0303938	B	TRINITY_DN80499_c1_g2_i10	ABQ23342.1	0	plastid transketolase [Euglena gracilis]	TRINITY_DN80499_c1_g2_i2	Q43848.1	0	RecName: Full=Transketolase, chloroplastic; Short=TK; Flags: Precursor	TRINITY_DN80499_c1_g2_i2	AT2G45290.2	0	Transketolase-2, chloroplastic [Source:UniProtKB/Swiss-Prot;Acc:F4IW47]	TRINITY_DN80499_c1_g2_i10	EDP06856	0	Transketolase [Source:UniProtKB/TrEMBL;Acc:A8IAN1]	TRINITY_DN80499_c1_g2_i2	BAA17310	0	transketolase	TRINITY_DN80499_c1_g2_i11	ENSP00000405455.2	2.87e-36	transketolase [Source:HGNC Symbol;Acc:HGNC:11834]	TRINITY_DN80499_c1_g2_i2	AAZ13381	0	transketolase, putative
TRINITY_DN80504_c2_g1	219	158	-1.38696	9.81595e-05	222	159	-1.39082	7.69022e-06	B	TRINITY_DN80504_c2_g1_i11	CEP02225.1	3.27e-11	hypothetical protein PBRA_002490 [Plasmodiophora brassicae]
TRINITY_DN80648_c2_g2	110	144	1.318	0.0244974	111	146	1.313	0.00775618	B
TRINITY_DN80682_c5_g1	297	371	1.25	0.000844305	300	374	1.245	0.000411276	B
TRINITY_DN80682_c5_g2	530	752	1.418	4.62571e-11	537	759	1.413	5.32024e-09	B
TRINITY_DN80684_c1_g4	38	155	4.036	2.71631e-32	39	156	4.015	1.10912e-33	B	TRINITY_DN80684_c1_g4_i2	AIK01831.1	2.83e-49	metallothionein [Rhodotorula mucilaginosa]
TRINITY_DN80752_c1_g1	116	80	-1.46413	0.00564747	118	80	-1.46843	0.00254136	B	TRINITY_DN80752_c1_g1_i10	KJE98040.1	1.33e-09	hypothetical protein CAOG_008076 [Capsaspora owczarzaki ATCC 30864]																					TRINITY_DN80752_c1_g1_i10	AAZ12172	1.84e-07	RNA-editing complex protein MP100
TRINITY_DN80756_c1_g3	810	694	-1.16822	0.0202759	820	700	-1.17233	0.0250208	B	TRINITY_DN80756_c1_g3_i6	KOM32441.1	9.94e-41	hypothetical protein LR48_Vigan01g199700 [Vigna angularis]	TRINITY_DN80756_c1_g3_i6	Q8GU92.1	1.05e-38	RecName: Full=ABC transporter G family member 35; Short=OsABCG35; AltName: Full=Pleiotropic drug resistance protein 11; Short=OsPDR11	TRINITY_DN80756_c1_g3_i6	AT1G66950.1	1.14e-38	ABC transporter G family member 39 [Source:UniProtKB/Swiss-Prot;Acc:Q7PC84]	TRINITY_DN80756_c1_g3_i6	EDP04156	1.14e-36	Predicted protein [Source:UniProtKB/TrEMBL;Acc:A8IT35]	TRINITY_DN80756_c1_g3_i3	BAA17440	1.07e-07	ABC transporter	TRINITY_DN80756_c1_g3_i6	ENSP00000339744.3	5.48e-20	ATP binding cassette subfamily G member 1 [Source:HGNC Symbol;Acc:HGNC:73]	TRINITY_DN80756_c1_g3_i6	EAN76672	8.28e-20	ABC transporter, putative
TRINITY_DN80799_c0_g1	198	240	1.211	0.0459026	201	243	1.207	0.0160229	B
TRINITY_DN80812_c6_g3	127	79	-1.61031	0.000277486	128	80	-1.6129	0.0001658	B
TRINITY_DN80870_c6_g1	188	136	-1.38313	0.0050468	191	137	-1.38696	0.00276879	B
TRINITY_DN80913_c1_g1	14	175	11.898	3.21525e-57	14	177	11.792	2.36934e-56	B	TRINITY_DN80913_c1_g1_i2	XP_016274531.1	7.28e-16	mitochondrial ATPase, F1 complex, epsilon subunit [Rhodotorula toruloides NP11]
TRINITY_DN80977_c1_g1	326	274	-1.18483	0.0310406	330	277	-1.18906	0.00840977	B	TRINITY_DN80977_c1_g1_i7	GAX96070.1	4.49e-22	phosphatidylinositol-4-phosphate 5 kinase-like protein [Pythium insidiosum]	TRINITY_DN80977_c1_g1_i7	O13853.3	2.84e-14	RecName: Full=Phosphatidylinositol 4-phosphate 5-kinase its3; AltName: Full=1-phosphatidylinositol 4-phosphate kinase; AltName: Full=Diphosphoinositide kinase; AltName: Full=PIP5K; AltName: Full=PtdIns(4)P-5-kinase	TRINITY_DN80977_c1_g1_i7	AT1G21980.1	9.78e-13	Phosphatidylinositol 4-phosphate 5-kinase 1 [Source:UniProtKB/Swiss-Prot;Acc:Q56YP2]	TRINITY_DN80977_c1_g1_i7	EDO99970	4.09e-12	Predicted protein [Source:UniProtKB/TrEMBL;Acc:A8J7V0]					TRINITY_DN80977_c1_g1_i7	ENSP00000357885.4	2.26e-11	phosphatidylinositol-4-phosphate 5-kinase type 1 alpha [Source:HGNC Symbol;Acc:HGNC:8994]	TRINITY_DN80977_c1_g1_i7	AAZ10753	8.49e-12	phosphatidylinositol 4-phosphate 5-kinase alpha, putative
TRINITY_DN80992_c2_g1	889	1038	1.168	0.00286653	900	1047	1.164	0.0075261	B
TRINITY_DN80992_c2_g2	722	853	1.181	0.000333228	730	860	1.177	0.001882	B
TRINITY_DN81002_c1_g1	936	789	-1.18624	0.000311543	948	796	-1.19048	0.00073702	B	TRINITY_DN81002_c1_g1_i5	AKT76079.1	1.16e-09	phytochrome, partial [Chroomonas sp. ROZZ_2007332]					TRINITY_DN81002_c1_g1_i6	AT3G17750.1	4.06e-08	AT3g17750/MIG5_4 [Source:UniProtKB/TrEMBL;Acc:Q8RX85]	TRINITY_DN81002_c1_g1_i4	EDO98269	2.29e-07	Predicted protein [Source:UniProtKB/TrEMBL;Acc:A8JD18]									TRINITY_DN81002_c1_g1_i3	AAZ11902	3.33e-07	protein kinase, putative
TRINITY_DN81032_c0_g1	520	400	-1.2987	0.000314963	526	403	-1.30378	0.00104862	B
TRINITY_DN81037_c2_g1	1370	921	-1.4881	6.10866e-09	1388	930	-1.49477	1.99339e-12	B	TRINITY_DN81037_c2_g1_i6	WP_074718558.1	4.64e-07	hypothetical protein [Ruminococcus flavefaciens]
TRINITY_DN81070_c1_g1	1704	1896	1.113	0.0246153	1725	1913	1.109	0.0470782	B
TRINITY_DN81071_c1_g3	216	163	-1.3245	0.00655905	219	164	-1.32979	0.00283328	B	TRINITY_DN81071_c1_g3_i4	XP_013754926.1	9.98e-33	hypothetical protein AMSG_08960 [Thecamonas trahens ATCC 50062]	TRINITY_DN81071_c1_g3_i4	P08678.2	1.25e-26	RecName: Full=Adenylate cyclase; AltName: Full=ATP pyrophosphate-lyase; AltName: Full=Adenylyl cyclase					TRINITY_DN81071_c1_g3_i2	EDP02563	3.97e-17	Predicted protein [Source:UniProtKB/TrEMBL;Acc:A8IZQ7]									TRINITY_DN81071_c1_g3_i4	EAN79557	6.83e-27	receptor-type adenylate cyclase GRESAG 4, putative
TRINITY_DN81095_c0_g2	261	312	1.197	0.0247845	264	315	1.192	0.0100223	B	TRINITY_DN81095_c0_g2_i8	XP_001773528.1	3.74e-80	predicted protein [Physcomitrella patens]	TRINITY_DN81095_c0_g2_i8	Q680K2.1	3.95e-38	RecName: Full=Haloacid dehalogenase-like hydrolase domain-containing protein At4g39970; Flags: Precursor	TRINITY_DN81095_c0_g2_i8	AT1G16080.1	1e-74	Putative uncharacterized protein At1g16080 [Source:UniProtKB/TrEMBL;Acc:Q9S9M7]	TRINITY_DN81095_c0_g2_i8	EDP05665	6.74e-75	Predicted protein [Source:UniProtKB/TrEMBL;Acc:A8IGI0]
TRINITY_DN81103_c2_g1	122	157	1.287	0.0214474	124	158	1.283	0.00336675	B
TRINITY_DN81140_c1_g2	162	114	-1.41643	0.00203314	164	115	-1.42248	0.000691115	B	TRINITY_DN81140_c1_g2_i4	XP_003064878.1	1.45e-15	predicted protein [Micromonas pusilla CCMP1545]
TRINITY_DN81168_c3_g2	1212	1078	-1.12486	0.00109802	1227	1087	-1.12867	0.00206282	B	TRINITY_DN81168_c3_g2_i2	XP_003384841.1	6.14e-24	PREDICTED: cytosolic acyl coenzyme A thioester hydrolase-like [Amphimedon queenslandica]	TRINITY_DN81168_c3_g2_i2	Q64559.4	4.99e-20	RecName: Full=Cytosolic acyl coenzyme A thioester hydrolase; AltName: Full=ACH1; AltName: Full=ACT; AltName: Full=Acyl-CoA thioesterase 7; AltName: Full=Brain acyl-CoA hydrolase; Short=BACH; AltName: Full=CTE-IIa; AltName: Full=CTE-IIb; Short=CTE-II; AltN													TRINITY_DN81168_c3_g2_i2	ENSP00000402532.1	3e-21	acyl-CoA thioesterase 7 [Source:HGNC Symbol;Acc:HGNC:24157]
TRINITY_DN81230_c1_g1	712	627	-1.13507	0.0348888	720	632	-1.13895	0.0378405	B	TRINITY_DN81230_c1_g1_i23	GAQ79605.1	8.09e-14	hypothetical protein KFL_000340085 [Klebsormidium nitens]	TRINITY_DN81230_c1_g1_i23	Q8GU87.3	5.29e-09	RecName: Full=ABC transporter G family member 31; Short=OsABCG31; AltName: Full=Pleiotropic drug resistance protein 6; Short=OsPDR6	TRINITY_DN81230_c1_g1_i23	AT4G15230.3	5.35e-06	ABC transporter G family member 30 [Source:UniProtKB/Swiss-Prot;Acc:Q8GZ52]	TRINITY_DN81230_c1_g1_i23	EDO99773	1.19e-06	ABC transporter [Source:UniProtKB/TrEMBL;Acc:A8J8F1]
TRINITY_DN81250_c1_g1	217	164	-1.31579	0.00295633	219	166	-1.321	0.00067509	B
TRINITY_DN81250_c2_g1	428	280	-1.52672	6.38002e-08	434	283	-1.53374	1.1087e-06	B
TRINITY_DN81270_c2_g2	3614	3932	1.088	0.00298036	3658	3967	1.084	0.0161662	B	TRINITY_DN81270_c2_g2_i4	CBN76659.1	1.21e-102	ATP synthase gamma chain [Ectocarpus siliculosus]	TRINITY_DN81270_c2_g2_i4	Q06908.1	7.58e-100	RecName: Full=ATP synthase gamma chain, chloroplastic; AltName: Full=F-ATPase gamma subunit; Flags: Precursor	TRINITY_DN81270_c2_g2_i4	AT4G04640.1	1.95e-90	ATP synthase gamma chain 1, chloroplastic [Source:UniProtKB/Swiss-Prot;Acc:Q01908]	TRINITY_DN81270_c2_g2_i4	EDP08312	3.34e-97	ATP synthase gamma chain, chloroplastic [Source:UniProtKB/Swiss-Prot;Acc:P12113]	TRINITY_DN81270_c2_g2_i4	BAA16734	2.66e-89	ATP synthase g subunit	TRINITY_DN81270_c2_g2_i16	ENSP00000349142.7	8.6e-22	ATP synthase, H+ transporting, mitochondrial F1 complex, gamma polypeptide 1 [Source:HGNC Symbol;Acc:HGNC:833]
TRINITY_DN81332_c0_g1	149	106	-1.3986	0.0328971	150	108	-1.40449	0.0263675	B
TRINITY_DN81403_c4_g1	107	73	-1.46199	0.015093	108	74	-1.46628	0.01096	B
TRINITY_DN81435_c4_g2	185	144	-1.28205	0.014919	187	146	-1.28535	0.0024951	B
TRINITY_DN81445_c1_g1	6100	6767	1.109	3.75235e-05	6175	6827	1.105	0.000624893	B	TRINITY_DN81445_c1_g1_i7	XP_005830009.1	4.16e-73	hypothetical protein GUITHDRAFT_153427, partial [Guillardia theta CCMP2712]	TRINITY_DN81445_c1_g1_i7	P83299.1	1.16e-31	RecName: Full=Carbonic anhydrase 1; AltName: Full=Carbonate dehydratase I; AltName: Full=Carbonic anhydrase I; Short=CA-I; AltName: Full=Ice-CA	TRINITY_DN81445_c1_g1_i7	AT1G08080.1	8.24e-15	Alpha carbonic anhydrase 7 [Source:UniProtKB/Swiss-Prot;Acc:Q8L817]	TRINITY_DN81445_c1_g1_i7	EDP00852	6.22e-10	Carbonic anhydrase 3 [Source:UniProtKB/TrEMBL;Acc:A8J4Z8]					TRINITY_DN81445_c1_g1_i7	ENSP00000285381.2	5.91e-28	carbonic anhydrase 3 [Source:HGNC Symbol;Acc:HGNC:1374]
TRINITY_DN81481_c3_g1	6217	6720	1.081	0.0179165	6294	6779	1.077	0.0422326	B	TRINITY_DN81481_c3_g1_i2	ALR69571.1	4.54e-52	ribulose-1,5-bisphosphate carboxylase/oxygenase subunit, partial [Euglena hiemalis]	TRINITY_DN81481_c3_g1_i2	P16881.1	6.92e-53	RecName: Full=Ribulose bisphosphate carboxylase small chains, chloroplastic; Short=RuBisCO small subunits; Contains: RecName: Full=Ribulose bisphosphate carboxylase small chain P1, chloroplastic; Contains: RecName: Full=Ribulose bisphosphate carboxylase s	TRINITY_DN81481_c3_g1_i2	AT5G38410.1	9.59e-18	Ribulose bisphosphate carboxylase small chain [Source:UniProtKB/TrEMBL;Acc:B3H5S2]	TRINITY_DN81481_c3_g1_i2	EDO96904	2.45e-30	Ribulose bisphosphate carboxylase small chain 1, chloroplastic [Source:UniProtKB/Swiss-Prot;Acc:P00873]	TRINITY_DN81481_c3_g1_i2	BAA10192	3.12e-09	ribulose bisphosphate carboxylase small subunit
TRINITY_DN81524_c0_g1	195	245	1.255	0.0418236	198	247	1.25	0.0294708	B	TRINITY_DN81524_c0_g1_i9	KZV41864.1	2.35e-25	cation/calcium exchanger 4-like [Dorcoceras hygrometricum]	TRINITY_DN81524_c0_g1_i9	Q9LJI2.1	1.21e-23	RecName: Full=Cation/calcium exchanger 3; Short=AtCCX3; AltName: Full=Protein CATION CALCIUM EXCHANGER 3; AltName: Full=Protein CATION EXCHANGER 9	TRINITY_DN81524_c0_g1_i9	AT3G14070.1	1.43e-24	Cation/calcium exchanger 3 [Source:UniProtKB/Swiss-Prot;Acc:Q9LJI2]	TRINITY_DN81524_c0_g1_i2	EDO99207	1.75e-09	CAX family of cation antiporters, membrane protein [Source:UniProtKB/TrEMBL;Acc:A8JA92]					TRINITY_DN81524_c0_g1_i9	ENSP00000202831.3	1.44e-16	solute carrier family 8 member B1 [Source:HGNC Symbol;Acc:HGNC:26175]
TRINITY_DN81532_c2_g2	696	779	1.119	0.0281662	705	786	1.115	0.0407375	B	TRINITY_DN81532_c2_g2_i15	EPY27932.1	1.19e-93	hypothetical protein STCU_05406 [Strigomonas culicis]	TRINITY_DN81532_c2_g2_i15	Q8YV57.1	7.78e-32	RecName: Full=Uncharacterized WD repeat-containing protein all2124	TRINITY_DN81532_c2_g2_i15	AT5G23430.2	1.41e-22	Katanin p80 WD40 repeat-containing subunit B1 homolog [Source:UniProtKB/Swiss-Prot;Acc:Q8H0T9]	TRINITY_DN81532_c2_g2_i15	EDP01058	3.63e-30	Predicted protein [Source:UniProtKB/TrEMBL;Acc:A8J3X0]	TRINITY_DN81532_c2_g2_i15	BAA10064	1.5e-23	beta transducin-like protein	TRINITY_DN81532_c2_g2_i15	ENSP00000330381.4	6.91e-25	WD repeat domain 5B [Source:HGNC Symbol;Acc:HGNC:17826]	TRINITY_DN81532_c2_g2_i15	AAZ12694	8.1e-82	hypothetical protein, conserved
TRINITY_DN81558_c1_g1	1383	1228	-1.12613	0.00837734	1400	1239	-1.12994	0.0138544	B	TRINITY_DN81558_c1_g1_i4	OFY88481.1	3.38e-10	hypothetical protein A2236_10660 [Bacteroidetes bacterium RIFOXYA2_FULL_33_7]
TRINITY_DN81617_c2_g1	378	306	-1.23305	0.0116568	383	309	-1.23609	0.0087998	B	TRINITY_DN81617_c2_g1_i5	WP_006725538.1	8e-13	guanylate cyclase [Agrobacterium albertimagni]	TRINITY_DN81617_c2_g1_i5	Q553Y7.1	4.27e-11	RecName: Full=Guanylyl cyclase, membrane; AltName: Full=DdGCA; Short=GCA					TRINITY_DN81617_c2_g1_i5	EDP02416	2.45e-12	Guanylate cyclase [Source:UniProtKB/TrEMBL;Acc:A8IZI3]	TRINITY_DN81617_c2_g1_i1	BAA16969	3.6e-06	adenylate cyclase	TRINITY_DN81617_c2_g1_i1	ENSP00000341083.2	6.36e-10	natriuretic peptide receptor 2 [Source:HGNC Symbol;Acc:HGNC:7944]
TRINITY_DN81665_c7_g2	517	638	1.235	6.68912e-06	523	644	1.23	2.67266e-05	B
TRINITY_DN81673_c1_g1	897	764	-1.17509	0.00769589	908	770	-1.17925	0.0102488	B
TRINITY_DN81673_c2_g1	227	162	-1.40252	0.0030521	230	164	-1.40647	0.00234107	B
TRINITY_DN81751_c1_g1	4475	3736	-1.1976	2.5323e-10	4532	3769	-1.20192	4.59863e-08	B	TRINITY_DN81751_c1_g1_i16	XP_007918997.1	1.17e-159	putative anaerobic ribonucleoside-triphosphate reductase protein [Phaeoacremonium minimum UCRPA7]	TRINITY_DN81751_c1_g1_i3	Q58624.1	2.22e-24	RecName: Full=Putative glycyl-radical enzyme activating enzyme MJ1227; Short=GRE activating enzyme MJ1227
TRINITY_DN81764_c10_g1	3116	2760	-1.12867	1.02623e-06	3156	2784	-1.13379	4.23683e-05	B	TRINITY_DN81764_c10_g1_i1	CEM32862.1	0	unnamed protein product, partial [Vitrella brassicaformis CCMP3155]	TRINITY_DN81764_c10_g1_i1	O05394.1	2.24e-108	RecName: Full=Cystathionine gamma-lyase; AltName: Full=Gamma-cystathionase; AltName: Full=Homocysteine gamma-lyase	TRINITY_DN81764_c10_g1_i1	AT3G01120.1	1.47e-72	MTO1 [Source:UniProtKB/TrEMBL;Acc:A0A178VB36]	TRINITY_DN81764_c10_g1_i1	EDP01529	1.09e-73	Cystathionine gamma-synthase [Source:UniProtKB/TrEMBL;Acc:A8J355]					TRINITY_DN81764_c10_g1_i1	ENSP00000359976.3	3.17e-83	cystathionine gamma-lyase [Source:HGNC Symbol;Acc:HGNC:2501]	TRINITY_DN81764_c10_g1_i1	EAN77147	0	cystathione gamma lyase, putative
TRINITY_DN8189_c0_g1	81	432	5.325	2.75178e-103	82	436	5.302	3.12509e-102	B	TRINITY_DN8189_c0_g1_i1	KWU44456.1	6.14e-88	ribosomal protein S8 [Rhodotorula sp. JG-1b]	TRINITY_DN8189_c0_g1_i1	P0C0W1.2	1.86e-73	RecName: Full=40S ribosomal protein S22-A; AltName: Full=RP50; AltName: Full=S24; AltName: Full=Small ribosomal subunit protein uS8-A; AltName: Full=YP58; AltName: Full=YS22	TRINITY_DN8189_c0_g1_i1	AT3G46040.1	2.91e-69	RPS15AD [Source:UniProtKB/TrEMBL;Acc:A0A178VIE3]	TRINITY_DN8189_c0_g1_i1	EDO97894	2.31e-67	Ribosomal protein S15a [Source:UniProtKB/TrEMBL;Acc:A8JE07]	TRINITY_DN8189_c0_g1_i1	BAA17336	1.97e-06	30S ribosomal protein S8	TRINITY_DN8189_c0_g1_i1	ENSP00000458115.1	7.5e-68	ribosomal protein S15a [Source:HGNC Symbol;Acc:HGNC:10389]	TRINITY_DN8189_c0_g1_i1	AAZ10469	6.22e-62	40S ribosomal protein S15a, putative
TRINITY_DN81911_c8_g2	515	592	1.15	0.0204482	521	598	1.146	0.0244364	B
TRINITY_DN81940_c1_g4	154	115	-1.33333	0.0305406	156	116	-1.3369	0.0161662	B
TRINITY_DN81971_c5_g1	1290	1521	1.178	1.05702e-08	1307	1534	1.174	8.14737e-07	B	TRINITY_DN81971_c5_g1_i1	CAX74259.1	5.34e-09	Cell division cycle and apoptosis regulator protein 1 [Schistosoma japonicum]	TRINITY_DN81971_c5_g1_i1	Q8IX12.2	3.85e-08	RecName: Full=Cell division cycle and apoptosis regulator protein 1; AltName: Full=Cell cycle and apoptosis regulatory protein 1; Short=CARP-1; AltName: Full=Death inducer with SAP domain													TRINITY_DN81971_c5_g1_i1	ENSP00000439642.1	7.89e-09	cell division cycle and apoptosis regulator 1 [Source:HGNC Symbol;Acc:HGNC:24236]
TRINITY_DN82003_c3_g1	558	651	1.167	0.00109668	565	656	1.162	0.00196068	B	TRINITY_DN82003_c3_g1_i2	PAA71373.1	5.93e-38	hypothetical protein BOX15_Mlig006686g1 [Macrostomum lignano]	TRINITY_DN82003_c3_g1_i2	Q5BP74.2	3e-37	RecName: Full=Casein kinase I isoform delta; Short=CKI-delta; Short=CKId	TRINITY_DN82003_c3_g1_i2	AT3G23340.1	5.22e-35	Casein kinase 1-like protein 10 [Source:UniProtKB/Swiss-Prot;Acc:Q9LW62]	TRINITY_DN82003_c3_g1_i2	EDP02935	2.96e-34	Ser/thr kinase [Source:UniProtKB/TrEMBL;Acc:A8IYG8]	TRINITY_DN82003_c3_g1_i7	BAA10726	4.09e-07	eukaryotic protein kinase	TRINITY_DN82003_c3_g1_i2	ENSP00000407235.2	6.38e-38	casein kinase 1 epsilon [Source:HGNC Symbol;Acc:HGNC:2453]	TRINITY_DN82003_c3_g1_i2	AAZ11194	1.97e-30	casein kinase I, epsilon isoform, putative
TRINITY_DN82041_c0_g4	869	745	-1.16686	0.000344487	880	752	-1.17096	0.000900071	B
TRINITY_DN82056_c0_g1	700	806	1.15	0.0109457	708	813	1.146	0.0165547	B	TRINITY_DN82056_c0_g1_i3	NP_001151538.1	0	eukaryotic peptide chain release factor subunit 1-1 [Zea mays]	TRINITY_DN82056_c0_g1_i3	Q9GR88.1	0	RecName: Full=Eukaryotic peptide chain release factor subunit 1; Short=Eukaryotic release factor 1; Short=eRF1	TRINITY_DN82056_c0_g1_i3	AT3G26618.1	0	ERF1-3 [Source:UniProtKB/TrEMBL;Acc:A0A178VIS2]	TRINITY_DN82056_c0_g1_i3	EDP09124	0	Eukaryotic release factor 1 [Source:UniProtKB/TrEMBL;Acc:Q8VZZ5]					TRINITY_DN82056_c0_g1_i3	ENSP00000353741.5	0	eukaryotic translation termination factor 1 [Source:HGNC Symbol;Acc:HGNC:3477]	TRINITY_DN82056_c0_g1_i5	EAN79202	0	eukaryotic peptide chain release factor subunit 1, putative
TRINITY_DN82106_c1_g3	166	203	1.23	0.0340604	167	205	1.226	0.00588405	B	TRINITY_DN82106_c1_g3_i2	OMJ81769.1	4.49e-20	hypothetical protein SteCoe_17712 [Stentor coeruleus]	TRINITY_DN82106_c1_g3_i2	Q91820.1	1.14e-18	RecName: Full=Aurora kinase A-A; AltName: Full=Aurora/IPL1-related kinase 1; Short=ARK-1; Short=Aurora-related kinase 1; AltName: Full=Serine/threonine-protein kinase 6-A; AltName: Full=Serine/threonine-protein kinase Eg2-A; Short=pEg2; AltName: Full=Seri	TRINITY_DN82106_c1_g3_i2	AT5G04510.3	7.13e-17	3-phosphoinositide-dependent protein kinase 1 [Source:UniProtKB/Swiss-Prot;Acc:Q9XF67]	TRINITY_DN82106_c1_g3_i2	EDO97494	4.08e-18	3-phosphoinoside dependent protein kinase [Source:UniProtKB/TrEMBL;Acc:A8JF16]	TRINITY_DN82106_c1_g3_i3	BAA18391	1.33e-06	eukariotic protein kinase	TRINITY_DN82106_c1_g3_i2	ENSP00000373876.3	8.86e-18	3-phosphoinositide dependent protein kinase 1 [Source:HGNC Symbol;Acc:HGNC:8816]	TRINITY_DN82106_c1_g3_i2	EAN78675	1e-15	protein kinase A catalytic subunit
TRINITY_DN82109_c0_g1	4441	3841	-1.15607	0.00012557	4498	3875	-1.16009	0.000759193	B	TRINITY_DN82109_c0_g1_i32	PAA69705.1	3.59e-12	hypothetical protein BOX15_Mlig028670g1, partial [Macrostomum lignano]																	TRINITY_DN82109_c0_g1_i9	ENSP00000478469.1	1.77e-06	ADAM metallopeptidase domain 29 [Source:HGNC Symbol;Acc:HGNC:207]
TRINITY_DN82135_c2_g2	209	159	-1.31062	0.00542573	211	161	-1.31579	0.00116811	B
TRINITY_DN82165_c2_g5	7789	8504	1.092	0.00207777	7885	8580	1.088	0.00946437	B	TRINITY_DN82165_c2_g5_i1	OZJ05598.1	2.43e-150	Guanine nucleotide-binding protein subunit beta-2-like 1 [Bifiguratus adelaidae]	TRINITY_DN82165_c2_g5_i1	P63245.3	2.83e-149	RecName: Full=Receptor of activated protein C kinase 1; AltName: Full=Guanine nucleotide-binding protein subunit beta-2-like 1; AltName: Full=Receptor for activated C kinase; AltName: Full=Receptor of activated protein kinase C 1; Contains: RecName: Full=	TRINITY_DN82165_c2_g5_i1	AT3G18130.1	2.6e-136	Receptor for activated C kinase 1C [Source:UniProtKB/Swiss-Prot;Acc:Q9LV28]	TRINITY_DN82165_c2_g5_i1	EDO99650	1.32e-146	Receptor of activated protein kinase C 1 [Source:UniProtKB/TrEMBL;Acc:A8J8Y1]	TRINITY_DN82165_c2_g5_i1	BAA10064	2.43e-25	beta transducin-like protein	TRINITY_DN82165_c2_g5_i1	ENSP00000426909.1	6.2e-150	receptor for activated C kinase 1 [Source:HGNC Symbol;Acc:HGNC:4399]	TRINITY_DN82165_c2_g5_i1	EAN80090	3.91e-128	guanine nucleotide-binding protein beta subunit-like protein
TRINITY_DN82167_c1_g1	730	590	-1.23916	0.00145598	740	595	-1.24378	0.00426988	B	TRINITY_DN82167_c1_g1_i12	OLP78261.1	5.16e-11	putative ribosome biogenesis protein C8F11.04 [Symbiodinium microadriaticum]
TRINITY_DN82234_c0_g1	110	146	1.324	0.0252212	111	147	1.319	0.0110465	B
TRINITY_DN82317_c1_g4	69	361	5.202	3.48429e-80	70	364	5.176	3.73375e-76	B	TRINITY_DN82317_c1_g4_i2	KWU46079.1	1.75e-56	histone-fold-containing protein [Rhodotorula sp. JG-1b]	TRINITY_DN82317_c1_g4_i2	Q4HTT2.3	7.03e-54	RecName: Full=Histone H2B	TRINITY_DN82317_c1_g4_i2	AT2G28720.1	4.97e-47	Histone H2B.3 [Source:UniProtKB/Swiss-Prot;Acc:Q9SI96]	TRINITY_DN82317_c1_g4_i2	EDO95841	3.41e-48	Histone H2B [Source:UniProtKB/TrEMBL;Acc:A8JJV5]					TRINITY_DN82317_c1_g4_i2	ENSP00000366618.2	3.96e-50	histone cluster 1, H2bl [Source:HGNC Symbol;Acc:HGNC:4748]	TRINITY_DN82317_c1_g4_i2	EAN78438	1.05e-27	histone H2B, putative
TRINITY_DN82415_c2_g1	99	69	-1.43885	0.0457702	100	70	-1.44509	0.0362809	B
TRINITY_DN82445_c1_g1	115	77	-1.49925	0.00791777	116	77	-1.50376	0.0048247	B
TRINITY_DN82456_c0_g1	597	503	-1.18765	0.000301485	605	507	-1.1919	0.000221365	B
TRINITY_DN82479_c2_g1	8005	8656	1.081	0.0015133	8104	8732	1.077	0.0143678	B	TRINITY_DN82479_c2_g1_i3	AQL03896.1	7.5e-22	ATP/GTP-binding protein family [Zea mays]	TRINITY_DN82479_c2_g1_i2	Q8IX12.2	2.29e-19	RecName: Full=Cell division cycle and apoptosis regulator protein 1; AltName: Full=Cell cycle and apoptosis regulatory protein 1; Short=CARP-1; AltName: Full=Death inducer with SAP domain	TRINITY_DN82479_c2_g1_i3	AT2G03150.1	9e-16	ATP/GTP-binding protein-like protein [Source:UniProtKB/TrEMBL;Acc:F4IS91]									TRINITY_DN82479_c2_g1_i2	ENSP00000438610.1	1.6e-20	cell division cycle and apoptosis regulator 1 [Source:HGNC Symbol;Acc:HGNC:24236]
TRINITY_DN82520_c0_g5	6785	7421	1.094	0.0061745	6868	7487	1.09	0.0201604	B	TRINITY_DN82520_c0_g5_i2	ADH43284.1	1.3e-108	methionine S-adenosyl transferase [Euglena gracilis]	TRINITY_DN82520_c0_g5_i2	Q54F07.1	3.52e-59	RecName: Full=S-adenosylmethionine synthase; Short=AdoMet synthase; AltName: Full=Methionine adenosyltransferase; Short=MAT	TRINITY_DN82520_c0_g5_i2	AT4G01850.1	2.47e-57	S-adenosylmethionine synthase [Source:UniProtKB/TrEMBL;Acc:A0A178V3V9]	TRINITY_DN82520_c0_g5_i2	EDP08638	1.7e-55	S-adenosylmethionine synthase [Source:UniProtKB/Swiss-Prot;Acc:A8HYU5]	TRINITY_DN82520_c0_g5_i2	BAA16887	7.34e-35	S-adenosylmethionine synthetase	TRINITY_DN82520_c0_g5_i2	ENSP00000303147.3	2.33e-56	methionine adenosyltransferase 2A [Source:HGNC Symbol;Acc:HGNC:6904]	TRINITY_DN82520_c0_g5_i2	AAZ12043	4.38e-50	S-adenosylmethionine synthetase, putative
TRINITY_DN82539_c0_g1	195	130	-1.50376	0.00180203	198	131	-1.5083	0.00238588	B	TRINITY_DN82539_c0_g1_i6	XP_019848794.1	4.58e-20	PREDICTED: ras and EF-hand domain-containing protein-like isoform X1 [Amphimedon queenslandica]	TRINITY_DN82539_c0_g1_i5	P63012.1	8.01e-18	RecName: Full=Ras-related protein Rab-3A	TRINITY_DN82539_c0_g1_i5	AT4G19640.1	1.95e-16	RABF2B [Source:UniProtKB/TrEMBL;Acc:A0A178UXV7]	TRINITY_DN82539_c0_g1_i5	EDP00649	2.11e-14	Small rab-related GTPase [Source:UniProtKB/TrEMBL;Acc:A8J6A0]					TRINITY_DN82539_c0_g1_i5	ENSP00000222256.3	1.84e-18	RAB3A, member RAS oncogene family [Source:HGNC Symbol;Acc:HGNC:9777]	TRINITY_DN82539_c0_g1_i5	AAQ15670	1.2e-16	small GTP-binding protein RAB6, putative
TRINITY_DN82555_c5_g1	87	121	1.385	0.0218748	88	122	1.38	0.0122914	B
TRINITY_DN82588_c0_g1	123	76	-1.62075	0.000154791	125	76	-1.62602	7.54689e-05	B																					TRINITY_DN82588_c0_g1_i3	ENSP00000220616.4	3.69e-06	thyroglobulin [Source:HGNC Symbol;Acc:HGNC:11764]
TRINITY_DN82588_c0_g5	431	336	-1.2837	0.00143886	437	339	-1.28866	0.0028664	B
TRINITY_DN82649_c2_g1	395	328	-1.20337	0.0109457	400	331	-1.20773	0.00862735	B	TRINITY_DN82649_c2_g1_i8	OEU07693.1	6.05e-22	hypothetical protein FRACYDRAFT_271910 [Fragilariopsis cylindrus CCMP1102]
TRINITY_DN82720_c2_g4	146	104	-1.40449	0.0361363	148	105	-1.41044	0.0286627	B
TRINITY_DN82721_c2_g1	172	137	-1.25156	0.0481504	174	138	-1.25471	0.0114584	B	TRINITY_DN82721_c2_g1_i6	XP_015913961.1	8.52e-07	oxysterol-binding protein-related protein 1 [Parasteatoda tepidariorum]
TRINITY_DN82735_c2_g2	103	74	-1.39082	0.0356074	104	74	-1.39665	0.0201249	B	TRINITY_DN82735_c2_g2_i1	EKD29963.1	5.23e-17	heat shock protein [uncultured bacterium (gcode 4)]	TRINITY_DN82735_c2_g2_i1	Q5FGQ8.1	5.17e-17	RecName: Full=Chaperone protein DnaJ	TRINITY_DN82735_c2_g2_i1	AT5G03160.1	6.19e-14	DnaJ protein P58IPK homolog [Source:UniProtKB/Swiss-Prot;Acc:Q9LYW9]	TRINITY_DN82735_c2_g2_i1	EDP07270	2.92e-15	DnaJ-like protein [Source:UniProtKB/TrEMBL;Acc:A8I6S3]	TRINITY_DN82735_c2_g2_i1	BAA10566	5.58e-19	DnaJ protein	TRINITY_DN82735_c2_g2_i1	ENSP00000407136.1	1.72e-13	DnaJ heat shock protein family (Hsp40) member A4 [Source:HGNC Symbol;Acc:HGNC:14885]	TRINITY_DN82735_c2_g2_i1	EAN78253	6.68e-14	chaperone protein DNAJ, putative
TRINITY_DN82742_c2_g2	112	153	1.365	0.00999853	114	154	1.36	0.00576024	B
TRINITY_DN82746_c0_g2	255	208	-1.22549	0.0313775	258	209	-1.23001	0.0120038	B
TRINITY_DN82811_c0_g3	1935	2158	1.115	0.00658264	1958	2177	1.111	0.0161662	B
TRINITY_DN82871_c3_g1	15911	13614	-1.16822	0.0051973	16116	13737	-1.17371	0.000563442	B	TRINITY_DN82871_c3_g1_i15	ABW06951.1	5.85e-49	chloroplast light-harvesting complex I protein precursor, partial [Euglena gracilis]	TRINITY_DN82871_c3_g1_i15	P08976.1	2.49e-12	RecName: Full=Light-harvesting complex I LH38 proteins; Contains: RecName: Full=LH38 protein 1; Contains: RecName: Full=LH38 protein 2; Contains: RecName: Full=LH38 protein 3; Flags: Precursor	TRINITY_DN82871_c3_g1_i1	AT3G08940.1	3.72e-12	Chlorophyll a-b binding protein CP29.2, chloroplastic [Source:UniProtKB/Swiss-Prot;Acc:Q9XF88]	TRINITY_DN82871_c3_g1_i15	EDP06509	1.78e-11	Chlorophyll a-b binding protein, chloroplastic [Source:UniProtKB/TrEMBL;Acc:Q75VY8]
TRINITY_DN82871_c3_g2	4770	4124	-1.15607	1.83783e-05	4831	4162	-1.16009	0.000362019	B	TRINITY_DN82871_c3_g2_i1	ABW06951.1	7.05e-67	chloroplast light-harvesting complex I protein precursor, partial [Euglena gracilis]	TRINITY_DN82871_c3_g2_i1	P08975.1	1.42e-15	RecName: Full=Light-harvesting complex I LH35 proteins; Contains: RecName: Full=LH35 protein 1; Contains: RecName: Full=LH35 protein 2; Flags: Precursor	TRINITY_DN82871_c3_g2_i1	AT3G61470.1	1.21e-07	Photosystem I chlorophyll a/b-binding protein 2, chloroplastic [Source:UniProtKB/Swiss-Prot;Acc:Q9SYW8]	TRINITY_DN82871_c3_g2_i1	EDP08012	1.74e-10
TRINITY_DN82884_c5_g1	138	178	1.294	0.0485237	140	180	1.289	0.0317728	B	TRINITY_DN82884_c5_g1_i6	KFD71838.1	1.47e-09	hypothetical protein M514_15948, partial [Trichuris suis]	TRINITY_DN82884_c5_g1_i6	Q8SSY6.2	2.42e-07	RecName: Full=Bifunctional serine/threonine-protein kinase/NEDD4-like E3 ubiquitin-protein ligase; Includes: RecName: Full=Probable serine/threonine-protein kinase DDB_G0276527; Includes: RecName: Full=Probable NEDD4-like E3 ubiquitin-protein ligase DDB_G	TRINITY_DN82884_c5_g1_i6	AT3G53830.3	1.99e-07	Regulator of chromosome condensation (RCC1) family protein [Source:UniProtKB/TrEMBL;Acc:A0A1I9LSN7]	TRINITY_DN82884_c5_g1_i6	EDO97078	1.9e-08	Regulator of chromosome condensation (RCC1) family protein [Source:Projected from Arabidopsis thaliana (AT5G63860) TAIR;Acc:AT5G63860]					TRINITY_DN82884_c5_g1_i6	ENSP00000264276.6	2.38e-07	ALS2, alsin Rho guanine nucleotide exchange factor [Source:HGNC Symbol;Acc:HGNC:443]	TRINITY_DN82884_c5_g1_i6	EAN79639	6.57e-08	chromatin binding protein, putative
TRINITY_DN82912_c3_g1	882	1050	1.19	9.16715e-07	893	1060	1.186	1.01872e-05	B	TRINITY_DN82912_c3_g1_i6	WP_027389679.1	1.68e-34	inorganic phosphate transporter [Chrysiogenes arsenatis]	TRINITY_DN82912_c3_g1_i4	Q6PFM1.1	1.85e-29	RecName: Full=Sodium-dependent phosphate transporter 1-B; AltName: Full=Solute carrier family 20 member 1-B	TRINITY_DN82912_c3_g1_i6	AT3G26570.2	1.33e-22	phosphate transporter 2;1 [Source:TAIR;Acc:AT3G26570]	TRINITY_DN82912_c3_g1_i6	EDP05393	1.1e-31	Sodium/phosphate symporter [Source:UniProtKB/TrEMBL;Acc:A8ILT7]					TRINITY_DN82912_c3_g1_i6	ENSP00000429712.1	8.35e-29	solute carrier family 20 member 2 [Source:HGNC Symbol;Acc:HGNC:10947]	TRINITY_DN82912_c3_g1_i4	CAJ15956	8.3e-28	phosphate-repressible phosphate permease, putative
TRINITY_DN82984_c9_g1	2244	2579	1.15	8.33351e-07	2272	2602	1.146	4.72465e-05	B
TRINITY_DN82994_c5_g1	889	990	1.113	0.0330777	900	999	1.109	0.0472715	B	TRINITY_DN82994_c5_g1_i1	XP_002117205.1	0	DEAD box ATP-dependent RNA helicase [Trichoplax adhaerens]	TRINITY_DN82994_c5_g1_i1	Q9VHS8.1	0	RecName: Full=Eukaryotic initiation factor 4A-III; Short=eIF-4A-III; Short=eIF4A-III	TRINITY_DN82994_c5_g1_i1	AT3G19760.1	0	DEAD-box ATP-dependent RNA helicase 2 [Source:UniProtKB/Swiss-Prot;Acc:Q94A52]	TRINITY_DN82994_c5_g1_i1	EDO98621	0	Eukaryotic initiation factor [Source:UniProtKB/TrEMBL;Acc:A8JBN7]	TRINITY_DN82994_c5_g1_i1	BAA10556	1.2e-84	ATP-dependent RNA helicase; DeaD	TRINITY_DN82994_c5_g1_i1	ENSP00000269349.3	0	eukaryotic translation initiation factor 4A3 [Source:HGNC Symbol;Acc:HGNC:18683]	TRINITY_DN82994_c5_g1_i1	EAN79829	0	ATP-dependent DEAD/H RNA helicase, putative
TRINITY_DN83086_c3_g1	2176	2399	1.102	0.00177941	2203	2421	1.099	0.00812089	B	TRINITY_DN83086_c3_g1_i4	XP_002172168.1	1.44e-59	SNARE Ykt6 [Schizosaccharomyces japonicus yFS275]	TRINITY_DN83086_c3_g1_i4	O15498.1	9.16e-53	RecName: Full=Synaptobrevin homolog YKT6; Flags: Precursor	TRINITY_DN83086_c3_g1_i4	AT5G58060.1	2.36e-51	VAMP-like protein YKT61 [Source:UniProtKB/TrEMBL;Acc:F4KDI1]	TRINITY_DN83086_c3_g1_i7	EDP00430	1.25e-56	R-SNARE protein, YKT6-family [Source:UniProtKB/TrEMBL;Acc:A8J6T1]					TRINITY_DN83086_c3_g1_i4	ENSP00000223369.2	2e-53	YKT6 v-SNARE homolog (S. cerevisiae) [Source:HGNC Symbol;Acc:HGNC:16959]	TRINITY_DN83086_c3_g1_i7	EAN77273	4.87e-56	vesicle-associated membrane protein, putative
TRINITY_DN83110_c4_g1	140	86	-1.65017	0.00153079	142	86	-1.65289	0.00203674	B
TRINITY_DN83145_c4_g2	2095	2316	1.105	0.0251198	2121	2336	1.101	0.0487886	B
TRINITY_DN83174_c5_g1	190	142	-1.34048	0.0180435	193	144	-1.34409	0.0116146	B
TRINITY_DN83176_c1_g1	110	76	-1.43472	0.0100615	111	77	-1.43885	0.00433493	B	TRINITY_DN83176_c1_g1_i8	ESL07438.1	1.25e-92	kinesin [Trypanosoma rangeli SC58]	TRINITY_DN83176_c1_g1_i8	Q86ZC1.1	1.51e-66	RecName: Full=Kinesin heavy chain	TRINITY_DN83176_c1_g1_i8	AT1G12430.2	3.45e-67	Kinesin-like protein [Source:UniProtKB/TrEMBL;Acc:F4IC87]	TRINITY_DN83176_c1_g1_i8	EDP00849	9.19e-58	Kinesin-like protein [Source:UniProtKB/TrEMBL;Acc:A8J4Z2]					TRINITY_DN83176_c1_g1_i8	ENSP00000408979.2	1.74e-63	kinesin family member 5A [Source:HGNC Symbol;Acc:HGNC:6323]	TRINITY_DN83176_c1_g1_i8	AAZ11997	6.23e-68	kinesin, putative
TRINITY_DN83216_c11_g1	10381	11268	1.085	0.000149456	10510	11368	1.082	0.00434938	B	TRINITY_DN83216_c11_g1_i2	ACO50110.1	1.52e-45	elongation factor 1 alpha [Euglena gracilis]	TRINITY_DN83216_c11_g1_i2	P14963.1	1.14e-39	RecName: Full=Elongation factor 1-alpha; Short=EF-1-alpha	TRINITY_DN83216_c11_g1_i2	AT1G07930.2	9.05e-34	Elongation factor 1-alpha 4 [Source:UniProtKB/Swiss-Prot;Acc:Q8GTY0]	TRINITY_DN83216_c11_g1_i1	EDP01730	5.77e-10	Elongation factor-like protein [Source:UniProtKB/TrEMBL;Acc:A8J280]					TRINITY_DN83216_c11_g1_i2	ENSP00000479609.1	5.18e-34	eukaryotic translation elongation factor 1 alpha 1 [Source:HGNC Symbol;Acc:HGNC:3189]	TRINITY_DN83216_c11_g1_i2	EAN77636	2.67e-34	elongation factor 1-alpha
[truncated: 3,212 more rows]

## Sheet: Table_S4
Table S4: Arabidopsis thaliana PANTHER Overrepresentation Test
GO biological process complete	Arabidopsis thaliana - REFLIST (27502)	arabadopsis-604.txt (490)	arabadopsis-604.txt (expected)	arabadopsis-604.txt (over/under)	arabadopsis-604.txt (fold Enrichment)	arabadopsis-604.txt (P-value)
Unclassified (UNCLASSIFIED)	5719	60	101.89	-	0.59	0
[truncated: 419 more rows]
